# Supplementary material
Source: MDPI journal article supplement (https://www.mdpi.com/2073-4352/9/6/319)
Supplement: s1 [file s1]

Archive with 3 entries (3 files):
- br_sq.cif
- br_sq_checkcif.pdf
- crystals-519846-su.pdf
