# Supplementary material
Source: MDPI journal article supplement (https://www.mdpi.com/2073-4352/9/6/319)
Supplement: s1 [file s1 › br_sq.cif]

 
data_br_sq
 
_audit_creation_method            'SHELXL-2017/1'
_shelx_SHELXL_version_number      '2017/1'
_chemical_name_systematic         ?
_chemical_name_common             ?
_chemical_melting_point           ?
_chemical_formula_moiety          'C12 H8 Br2 N2 O2 Ru, C6 F4 I2'
_chemical_formula_sum
 'C18 H8 Br2 F4 I2 N2 O2 Ru' 
_chemical_formula_weight          874.95

loop_
 _atom_type_symbol
 _atom_type_description
 _atom_type_scat_dispersion_real
 _atom_type_scat_dispersion_imag
 _atom_type_scat_source
 'C'  'C'   0.0033   0.0016
 'International Tables Vol C Tables 4.2.6.8 and 6.1.1.4'
 'H'  'H'   0.0000   0.0000
 'International Tables Vol C Tables 4.2.6.8 and 6.1.1.4'
 'Br'  'Br'  -0.2901   2.4595
 'International Tables Vol C Tables 4.2.6.8 and 6.1.1.4'
 'F'  'F'   0.0171   0.0103
 'International Tables Vol C Tables 4.2.6.8 and 6.1.1.4'
 'I'  'I'  -0.4742   1.8119
 'International Tables Vol C Tables 4.2.6.8 and 6.1.1.4'
 'N'  'N'   0.0061   0.0033
 'International Tables Vol C Tables 4.2.6.8 and 6.1.1.4'
 'O'  'O'   0.0106   0.0060
 'International Tables Vol C Tables 4.2.6.8 and 6.1.1.4'
 'Ru'  'Ru'  -1.2594   0.8363
 'International Tables Vol C Tables 4.2.6.8 and 6.1.1.4'
 
_space_group_crystal_system       monoclinic
_space_group_IT_number            15
_space_group_name_H-M_alt         'C 2/c'
_space_group_name_Hall            '-C 2yc'
 
_shelx_space_group_comment
;
The symmetry employed for this shelxl refinement is uniquely defined
by the following loop, which should always be used as a source of
symmetry information in preference to the above space-group names.
They are only intended as comments.
;
 
loop_
 _space_group_symop_operation_xyz
 'x, y, z'
 '-x, y, -z+1/2'
 'x+1/2, y+1/2, z'
 '-x+1/2, y+1/2, -z+1/2'
 '-x, -y, -z'
 'x, -y, z-1/2'
 '-x+1/2, -y+1/2, -z'
 'x+1/2, -y+1/2, z-1/2'
 
_cell_length_a                    12.2824(4)
_cell_length_b                    30.3634(11)
_cell_length_c                    6.8630(2)
_cell_angle_alpha                 90
_cell_angle_beta                  100.444(2)
_cell_angle_gamma                 90
_cell_volume                      2517.05(14)
_cell_formula_units_Z             4
_cell_measurement_temperature     120(2)
_cell_measurement_reflns_used     711
_cell_measurement_theta_max       25
_cell_measurement_theta_min       3.1
 
_exptl_crystal_description        block
_exptl_crystal_colour             yellow
_exptl_crystal_density_meas       ?
_exptl_crystal_density_method     ?
_exptl_crystal_density_diffrn     2.309          
_exptl_crystal_F_000              1608
_exptl_transmission_factor_min    ?
_exptl_transmission_factor_max    ?
_exptl_crystal_size_max           0.227
_exptl_crystal_size_mid           0.104
_exptl_crystal_size_min           0.091
_exptl_absorpt_coefficient_mu     6.297
_shelx_estimated_absorpt_T_min    0.329
_shelx_estimated_absorpt_T_max    0.598
_exptl_absorpt_correction_type    'multi-scan'
_exptl_absorpt_correction_T_max   0.7458
_exptl_absorpt_correction_T_min   0.5361
_exptl_absorpt_process_details
;
SADABS-2012/1 (Bruker,2012) was used for absorption correction. 
wR2(int) was 0.0854 before and 0.0595 after correction. The Ratio of
minimum to maximum transmission is 0.7188. 
The \l/2 correction factor is 0.0015.
;
_publ_section_exptl_refinement
;
The structure contained some residual electron density related to disordered
and partially lost solvent of crystalllization. The final structural model was 
refined without the solvent molecules. The contribution of the missing solvent 
to the calculated structure factors was taken into account by using the SQUEEZE
routine of PLATON (Spek, 2009). The missing solvent was not taken into account 
in the unit cell content. 
Hydrogen atoms were positioned geometrically and constrained to ride on their 
parent atoms, with C---H = 0.95 \%A and U~iso~ = 1.2~eq~(parent atom). The 
highest peak is located 1.42 \%A from atom H4 and the deepest hole is located 
0.80 \%A from atom Ru1.
;
_diffrn_ambient_temperature       120(2)
_diffrn_radiation_wavelength      0.71073
_diffrn_radiation_type            MoK\a
_diffrn_source                    'sealed X-Ray tube'
_diffrn_radiation_monochromator   'horizontally mounted graphite crystal'   
_diffrn_measurement_device_type   'Bruker KAPPA APEX II CCD'
_diffrn_measurement_method        '\f scans and \w scans with \k offset'
_diffrn_measurement_device        '\k-geometry diffractometer' 
_diffrn_detector_area_resol_mean   16
_diffrn_reflns_number             12583
_diffrn_reflns_av_unetI/netI      0.0298
_diffrn_reflns_av_R_equivalents   0.0292
_diffrn_reflns_limit_h_min        -16
_diffrn_reflns_limit_h_max        16
_diffrn_reflns_limit_k_min        -41
_diffrn_reflns_limit_k_max        39
_diffrn_reflns_limit_l_min        -8
_diffrn_reflns_limit_l_max        9
_diffrn_reflns_theta_min          2.626
_diffrn_reflns_theta_max          29.145
_diffrn_reflns_theta_full         26.000
_diffrn_measured_fraction_theta_max   0.993
_diffrn_measured_fraction_theta_full  0.994
_diffrn_reflns_Laue_measured_fraction_max    0.993
_diffrn_reflns_Laue_measured_fraction_full   0.994
_diffrn_reflns_point_group_measured_fraction_max   0.993
_diffrn_reflns_point_group_measured_fraction_full  0.994
_reflns_number_total              3387
_reflns_number_gt                 3032
_reflns_threshold_expression      'I > 2\s(I)'
_reflns_Friedel_coverage          0.000
_reflns_Friedel_fraction_max      .
_reflns_Friedel_fraction_full     .
 
_reflns_special_details
;
 Reflections were merged by SHELXL according to the crystal
 class for the calculation of statistics and refinement.
 
 Structure factors included contributions from the .fab file.
 
 _reflns_Friedel_fraction is defined as the number of unique
 Friedel pairs measured divided by the number that would be
 possible theoretically, ignoring centric projections and
 systematic absences.
;
 
_computing_data_collection        'Collect (Bruker AXS BV, 1997-2008)'
_computing_cell_refinement        'Denzo/Scalepack (Otwinowski & Minor, 1997)'
_computing_data_reduction         'Denzo/Scalepack (Otwinowski & Minor, 1997)'
_computing_structure_solution     'SUPERFLIP (Palatinus & Chapuis, 2007)'
_computing_structure_refinement   'SHELXL-2017 (Sheldrick, 2017)'
_computing_molecular_graphics     'UCSF Chimera (Petterssen et al. 2004)'
_computing_publication_material   'SHELXL-2017 (Sheldrick, 2017)'
_refine_special_details           ?
_refine_ls_structure_factor_coef  Fsqd
_refine_ls_matrix_type            full
_refine_ls_weighting_scheme       calc
_refine_ls_weighting_details
'w=1/[\s^2^(Fo^2^)+(0.0093P)^2^+12.0100P] where P=(Fo^2^+2Fc^2^)/3'
_atom_sites_solution_primary      ?
_atom_sites_solution_secondary    ?
_atom_sites_solution_hydrogens    geom
_refine_ls_hydrogen_treatment     constr
_refine_ls_extinction_method      none
_refine_ls_extinction_coef        .
_refine_ls_number_reflns          3387
_refine_ls_number_parameters      141
_refine_ls_number_restraints      0
_refine_ls_R_factor_all           0.0339
_refine_ls_R_factor_gt            0.0281
_refine_ls_wR_factor_ref          0.0607
_refine_ls_wR_factor_gt           0.0587
_refine_ls_goodness_of_fit_ref    1.147
_refine_ls_restrained_S_all       1.147
_refine_ls_shift/su_max           0.001
_refine_ls_shift/su_mean          0.000
 
loop_
 _atom_site_label
 _atom_site_type_symbol
 _atom_site_fract_x
 _atom_site_fract_y
 _atom_site_fract_z
 _atom_site_U_iso_or_equiv
 _atom_site_adp_type
 _atom_site_occupancy
 _atom_site_site_symmetry_order  
 _atom_site_calc_flag
 _atom_site_refinement_flags_posn
 _atom_site_refinement_flags_adp
 _atom_site_refinement_flags_occupancy
 _atom_site_disorder_assembly
 _atom_site_disorder_group
I1 I 0.17898(2) 0.58956(2) 0.49495(3) 0.02602(7) Uani 1 1 d . . . . .
Ru1 Ru 0.500000 0.68040(2) 0.750000 0.01902(8) Uani 1 2 d S T P . .
Br1 Br 0.31793(3) 0.68363(2) 0.51012(5) 0.02442(8) Uani 1 1 d . . . . .
F1 F 0.21293(17) 0.48475(7) 0.4597(3) 0.0314(5) Uani 1 1 d . . . . .
F2 F -0.07521(18) 0.58301(6) 0.5373(3) 0.0297(4) Uani 1 1 d . . . . .
N1 N 0.5516(2) 0.73470(8) 0.5965(4) 0.0176(5) Uani 1 1 d . . . . .
O1 O 0.4149(3) 0.61047(10) 0.9963(5) 0.0538(9) Uani 1 1 d . . . . .
C3 C 0.6184(3) 0.81051(11) 0.4232(5) 0.0242(7) Uani 1 1 d . . . . .
H3 H 0.642708 0.836327 0.365701 0.029 Uiso 1 1 calc R U . . .
C4 C 0.5630(3) 0.81348(10) 0.5821(5) 0.0231(7) Uani 1 1 d . . . . .
H4 H 0.547745 0.841465 0.632875 0.028 Uiso 1 1 calc R U . . .
C2 C 0.6376(3) 0.76941(11) 0.3503(5) 0.0236(6) Uani 1 1 d . . . . .
H2 H 0.673781 0.766556 0.239874 0.028 Uiso 1 1 calc R U . . .
C1 C 0.6034(2) 0.73252(11) 0.4401(5) 0.0201(6) Uani 1 1 d . . . . .
H1 H 0.616988 0.704355 0.389202 0.024 Uiso 1 1 calc R U . . .
C5 C 0.5300(2) 0.77515(10) 0.6663(4) 0.0176(6) Uani 1 1 d . . . . .
C6 C 0.4471(3) 0.63566(12) 0.9036(6) 0.0313(8) Uani 1 1 d . . . . .
C9 C -0.0364(3) 0.54192(10) 0.5167(5) 0.0231(6) Uani 1 1 d . . . . .
C7 C 0.1081(3) 0.49298(11) 0.4815(5) 0.0235(7) Uani 1 1 d . . . . .
C8 C 0.0724(3) 0.53608(10) 0.4975(5) 0.0227(7) Uani 1 1 d . . . . .
 
loop_
 _atom_site_aniso_label
 _atom_site_aniso_U_11
 _atom_site_aniso_U_22
 _atom_site_aniso_U_33
 _atom_site_aniso_U_23
 _atom_site_aniso_U_13
 _atom_site_aniso_U_12
I1 0.03036(12) 0.02303(11) 0.02438(12) 0.00079(8) 0.00416(9) -0.00946(8)
Ru1 0.02317(18) 0.01287(15) 0.02115(18) 0.000 0.00438(13) 0.000
Br1 0.02378(16) 0.02333(16) 0.02580(18) -0.00015(13) 0.00355(13) -0.00769(12)
F1 0.0274(11) 0.0314(11) 0.0369(12) -0.0013(9) 0.0096(9) -0.0028(9)
F2 0.0390(12) 0.0183(9) 0.0321(11) -0.0007(8) 0.0075(9) -0.0020(8)
N1 0.0149(11) 0.0169(12) 0.0209(13) 0.0007(10) 0.0025(9) -0.0011(9)
O1 0.080(3) 0.0327(16) 0.050(2) 0.0112(15) 0.0171(18) -0.0163(16)
C3 0.0236(16) 0.0235(16) 0.0256(17) 0.0068(13) 0.0045(13) -0.0063(13)
C4 0.0274(17) 0.0169(14) 0.0249(17) 0.0000(13) 0.0046(13) -0.0006(12)
C2 0.0200(15) 0.0291(17) 0.0221(16) 0.0016(14) 0.0051(12) -0.0021(13)
C1 0.0169(14) 0.0220(15) 0.0204(15) -0.0013(12) 0.0007(11) 0.0028(11)
C5 0.0173(14) 0.0147(13) 0.0203(15) 0.0012(11) 0.0017(11) -0.0007(11)
C6 0.039(2) 0.0208(16) 0.0324(19) -0.0045(15) 0.0017(15) -0.0026(15)
C9 0.0330(17) 0.0168(14) 0.0195(15) 0.0003(12) 0.0049(13) -0.0042(13)
C7 0.0280(17) 0.0250(16) 0.0182(15) -0.0013(13) 0.0062(12) -0.0047(13)
C8 0.0303(17) 0.0190(15) 0.0180(15) 0.0025(12) 0.0022(12) -0.0085(13)
 
_geom_special_details
;
 All esds (except the esd in the dihedral angle between two l.s. planes)
 are estimated using the full covariance matrix.  The cell esds are taken
 into account individually in the estimation of esds in distances, angles
 and torsion angles; correlations between esds in cell parameters are only
 used when they are defined by crystal symmetry.  An approximate (isotropic)
 treatment of cell esds is used for estimating esds involving l.s. planes.
;
 
loop_
 _geom_bond_atom_site_label_1
 _geom_bond_atom_site_label_2
 _geom_bond_distance
 _geom_bond_site_symmetry_2
 _geom_bond_publ_flag
I1 C8 2.088(3) . yes
I1 Br1 3.3191(4) . yes
Ru1 C6 1.905(4) 2_656 yes
Ru1 C6 1.905(4) . yes
Ru1 N1 2.115(3) . yes
Ru1 N1 2.115(3) 2_656 yes
Ru1 Br1 2.5270(3) . yes
Ru1 Br1 2.5270(3) 2_656 yes
F1 C7 1.346(4) . ?
F2 C9 1.352(4) . ?
N1 C1 1.344(4) . ?
N1 C5 1.362(4) . ?
O1 C6 1.112(5) . ?
C3 C2 1.380(5) . ?
C3 C4 1.389(5) . ?
C3 H3 0.9500 . ?
C4 C5 1.392(4) . ?
C4 H4 0.9500 . ?
C2 C1 1.380(5) . ?
C2 H2 0.9500 . ?
C1 H1 0.9500 . ?
C5 C5 1.472(6) 2_656 ?
C9 C8 1.378(5) . ?
C9 C7 1.379(4) 5_566 ?
C7 C8 1.391(5) . ?
 
loop_
 _geom_angle_atom_site_label_1
 _geom_angle_atom_site_label_2
 _geom_angle_atom_site_label_3
 _geom_angle
 _geom_angle_site_symmetry_1
 _geom_angle_site_symmetry_3
 _geom_angle_publ_flag
C8 I1 Br1 171.34(10) . . yes
C6 Ru1 C6 89.0(2) 2_656 . ?
C6 Ru1 N1 96.71(13) 2_656 . ?
C6 Ru1 N1 174.26(13) . . ?
C6 Ru1 N1 174.26(13) 2_656 2_656 ?
C6 Ru1 N1 96.72(13) . 2_656 ?
N1 Ru1 N1 77.56(14) . 2_656 ?
C6 Ru1 Br1 91.01(12) 2_656 . ?
C6 Ru1 Br1 92.16(12) . . ?
N1 Ru1 Br1 87.43(7) . . ?
N1 Ru1 Br1 89.11(7) 2_656 . ?
C6 Ru1 Br1 92.15(12) 2_656 2_656 ?
C6 Ru1 Br1 91.01(12) . 2_656 ?
N1 Ru1 Br1 89.11(7) . 2_656 ?
N1 Ru1 Br1 87.43(7) 2_656 2_656 ?
Br1 Ru1 Br1 175.56(2) . 2_656 ?
Ru1 Br1 I1 112.108(14) . . yes
C1 N1 C5 118.4(3) . . ?
C1 N1 Ru1 125.9(2) . . ?
C5 N1 Ru1 115.6(2) . . ?
C2 C3 C4 118.9(3) . . ?
C2 C3 H3 120.6 . . ?
C4 C3 H3 120.6 . . ?
C3 C4 C5 119.5(3) . . ?
C3 C4 H4 120.2 . . ?
C5 C4 H4 120.2 . . ?
C1 C2 C3 119.1(3) . . ?
C1 C2 H2 120.5 . . ?
C3 C2 H2 120.5 . . ?
N1 C1 C2 122.9(3) . . ?
N1 C1 H1 118.6 . . ?
C2 C1 H1 118.6 . . ?
N1 C5 C4 121.2(3) . . ?
N1 C5 C5 115.58(17) . 2_656 ?
C4 C5 C5 123.26(19) . 2_656 ?
O1 C6 Ru1 178.0(4) . . ?
F2 C9 C8 119.6(3) . . ?
F2 C9 C7 118.1(3) . 5_566 ?
C8 C9 C7 122.3(3) . 5_566 ?
F1 C7 C9 118.9(3) . 5_566 ?
F1 C7 C8 120.4(3) . . ?
C9 C7 C8 120.7(3) 5_566 . ?
C9 C8 C7 117.0(3) . . ?
C9 C8 I1 121.4(2) . . ?
C7 C8 I1 121.6(2) . . ?
 
loop_
 _geom_torsion_atom_site_label_1
 _geom_torsion_atom_site_label_2
 _geom_torsion_atom_site_label_3
 _geom_torsion_atom_site_label_4
 _geom_torsion
 _geom_torsion_site_symmetry_1
 _geom_torsion_site_symmetry_2
 _geom_torsion_site_symmetry_3
 _geom_torsion_site_symmetry_4
 _geom_torsion_publ_flag
C2 C3 C4 C5 1.2(5) . . . . ?
C4 C3 C2 C1 -1.4(5) . . . . ?
C5 N1 C1 C2 1.5(4) . . . . ?
Ru1 N1 C1 C2 -178.1(2) . . . . ?
C3 C2 C1 N1 0.1(5) . . . . ?
C1 N1 C5 C4 -1.7(4) . . . . ?
Ru1 N1 C5 C4 177.9(2) . . . . ?
C1 N1 C5 C5 178.1(3) . . . 2_656 ?
Ru1 N1 C5 C5 -2.2(4) . . . 2_656 ?
C3 C4 C5 N1 0.4(5) . . . . ?
C3 C4 C5 C5 -179.5(4) . . . 2_656 ?
F2 C9 C8 C7 178.5(3) . . . . ?
C7 C9 C8 C7 -0.6(5) 5_566 . . . ?
F2 C9 C8 I1 -1.0(4) . . . . ?
C7 C9 C8 I1 179.9(2) 5_566 . . . ?
F1 C7 C8 C9 179.2(3) . . . . ?
C9 C7 C8 C9 0.6(5) 5_566 . . . ?
F1 C7 C8 I1 -1.4(4) . . . . ?
C9 C7 C8 I1 -179.9(2) 5_566 . . . ?
 
_refine_diff_density_max    0.597
_refine_diff_density_min   -0.623
_refine_diff_density_rms    0.118

# SQUEEZE RESULTS (Version = 270519)
# Note: Data are Listed for all Voids in the P1 Unit Cell
# i.e. Centre of Gravity, Solvent Accessible Volume,
# Recovered number of Electrons in the Void and
# Details about the Squeezed Material
loop_
  _platon_squeeze_void_nr                          
  _platon_squeeze_void_average_x                   
  _platon_squeeze_void_average_y                   
  _platon_squeeze_void_average_z                   
  _platon_squeeze_void_volume                      
  _platon_squeeze_void_count_electrons             
  _platon_squeeze_void_content                     
   1  0.000 -0.000 -0.019       158        74 ' '
   2  0.500  0.500  0.002       158        74 ' '
_platon_squeeze_void_probe_radius                  1.20
_platon_squeeze_details                           
;
The contribution of the missing solvent to the calculated structure factors
was taken into account with the BYPASS algorithm (van der Sluis & Spek, 1990),
implemented as the SQUEEZE option in PLATON (Spek, 2009).
;

_shelx_res_file
;
TITL br_sq in C2/c (SF, yellow block)
    br_sq.res
    created by SHELXL-2017/1 at 11:16:22 on 02-Jun-2019
CELL 0.71073 12.2824 30.3634 6.863 90 100.444 90
ZERR 4 0.0004 0.0011 0.0002 0 0.002 0
LATT 7
SYMM -X,+Y,0.5-Z
SFAC C H BR F I N O Ru
UNIT 72 32 8 16 8 8 8 4
LIST 4
L.S. 5 0   21
PLAN  -10
SIZE 0.091 0.104 0.227
TEMP -153.14(10)
BIND BR1 I1
MORE -1
OMIT 1 1 0
OMIT 2 2 0
OMIT 2 0 0
BOND $H
CONF
FMAP 2 53
ACTA 52
ABIN
WGHT    0.009300   12.010000
FVAR       0.05708
I1    5    0.178976    0.589563    0.494950    11.00000    0.03036    0.02303 =
         0.02438    0.00079    0.00416   -0.00946
RU1   8    0.500000    0.680401    0.750000    10.50000    0.02317    0.01287 =
         0.02115    0.00000    0.00438    0.00000
BR1   3    0.317935    0.683627    0.510122    11.00000    0.02378    0.02333 =
         0.02580   -0.00015    0.00355   -0.00769
F1    4    0.212929    0.484751    0.459729    11.00000    0.02741    0.03143 =
         0.03686   -0.00133    0.00964   -0.00279
F2    4   -0.075212    0.583010    0.537347    11.00000    0.03897    0.01832 =
         0.03211   -0.00069    0.00753   -0.00195
N1    6    0.551640    0.734702    0.596482    11.00000    0.01485    0.01687 =
         0.02085    0.00074    0.00251   -0.00114
O1    7    0.414889    0.610469    0.996333    11.00000    0.08009    0.03272 =
         0.05043    0.01123    0.01711   -0.01628
C3    1    0.618396    0.810507    0.423236    11.00000    0.02356    0.02347 =
         0.02564    0.00679    0.00445   -0.00632
AFIX  43
H3    2    0.642708    0.836327    0.365701    11.00000   -1.20000
AFIX   0
C4    1    0.562996    0.813478    0.582057    11.00000    0.02739    0.01693 =
         0.02488   -0.00003    0.00461   -0.00059
AFIX  43
H4    2    0.547745    0.841465    0.632875    11.00000   -1.20000
AFIX   0
C2    1    0.637556    0.769406    0.350339    11.00000    0.01997    0.02905 =
         0.02213    0.00160    0.00514   -0.00212
AFIX  43
H2    2    0.673781    0.766556    0.239874    11.00000   -1.20000
AFIX   0
C1    1    0.603371    0.732518    0.440117    11.00000    0.01687    0.02203 =
         0.02037   -0.00126    0.00073    0.00277
AFIX  43
H1    2    0.616988    0.704355    0.389202    11.00000   -1.20000
AFIX   0
C5    1    0.529959    0.775146    0.666296    11.00000    0.01730    0.01472 =
         0.02028    0.00123    0.00170   -0.00067
C6    1    0.447051    0.635663    0.903607    11.00000    0.03900    0.02076 =
         0.03242   -0.00446    0.00168   -0.00256
C9    1   -0.036448    0.541917    0.516750    11.00000    0.03301    0.01676 =
         0.01953    0.00028    0.00489   -0.00420
C7    1    0.108143    0.492980    0.481465    11.00000    0.02802    0.02504 =
         0.01823   -0.00134    0.00616   -0.00467
C8    1    0.072370    0.536085    0.497481    11.00000    0.03030    0.01899 =
         0.01804    0.00249    0.00221   -0.00848

HKLF 4


REM  br_sq in C2/c (SF, yellow block)
REM R1 =  0.0281 for    3032 Fo > 4sig(Fo)  and  0.0339 for all    3387 data
REM    141 parameters refined using      0 restraints

END

WGHT      0.0093     12.0097

REM Highest difference peak  0.597,  deepest hole -0.623,  1-sigma level  0.118
Q1    1   0.6318  0.8223  0.7773  11.00000  0.05    0.60
Q2    1   0.5360  0.6380  0.6809  11.00000  0.05    0.51
Q3    1   0.3222  0.7224  0.4810  11.00000  0.05    0.47
Q4    1   0.0000  0.5937  0.2500  10.50000  0.05    0.46
Q5    1   0.5120  0.6808  0.6898  11.00000  0.05    0.43
Q6    1   0.3973  0.6596  0.6452  11.00000  0.05    0.43
Q7    1   0.4619  0.7221  0.8593  11.00000  0.05    0.43
Q8    1   0.5000  0.7763  0.7500  10.50000  0.05    0.43
Q9    1   0.4570  0.8197  0.5221  11.00000  0.05    0.42
Q10   1   0.3120  0.4987  0.5041  11.00000  0.05    0.40
;
_shelx_res_checksum   90122

_shelx_hkl_file
;
  -2   0   0    3.09    0.30
   2   0   0    3.06    0.24
   2   0   0    3.51    0.27
  -2   0   0    3.33    0.24
  -4   0   0    2.00    0.23
   4   0   0    1.71    0.28
   4   0   0    2.01    0.24
  -6   0   0  450.70   22.47
   6   0   0  477.26   18.59
  -6   0   0  451.38   17.75
  -8   0   0  278.58   13.58
   8   0   0  294.04   12.86
 -10   0   0   75.67    2.85
  10   0   0   80.13    4.22
 -12   0   0   59.76    3.77
  12   0   0   54.60    3.02
 -14   0   0   39.56    2.81
  14   0   0   43.25    2.40
   1  -1   0   -0.16    0.05
  -1  -1   0   -0.12    0.04
   1   1   0   -0.13    0.03
   1   1   0   -0.14    0.06
  -3  -1   0  339.69   18.35
   3  -1   0  338.13   14.39
  -3  -1   0  343.36   13.43
   3  -1   0  348.87   18.03
  -3   1   0  346.24   17.36
   3   1   0  347.80   15.55
   3   1   0  345.05   15.56
  -3   1   0  349.70   15.99
   5  -1   0   14.22    1.08
  -5  -1   0   14.59    0.68
   5  -1   0   14.12    0.77
  -5  -1   0   13.61    0.64
  -5   1   0   14.83    0.78
   5   1   0   13.99    0.75
  -5   1   0   15.81    0.82
  -7  -1   0   33.88    1.72
   7  -1   0   34.54    2.15
   7  -1   0   32.36    1.53
   7   1   0   34.85    1.67
  -7   1   0   35.23    1.80
  -9  -1   0   33.00    1.87
   9  -1   0   34.82    1.92
   9   1   0   32.03    1.75
  -9   1   0   31.70    1.51
  11  -1   0    4.95    0.64
 -11  -1   0    5.49    0.65
  11   1   0    6.18    0.54
 -11   1   0    6.12    0.74
  13  -1   0    5.02    0.57
 -13  -1   0    3.78    0.62
 -13   1   0    4.68    0.66
  13   1   0    4.56    0.91
 -15  -1   0    4.82    0.86
  15  -1   0    3.53    0.66
 -15   1   0    3.60    0.66
  15   1   0    2.89    0.71
  -2  -2   0   56.04    2.87
   2  -2   0   55.14    2.71
  -2  -2   0   56.56    2.78
   2  -2   0   55.57    2.39
  -2   2   0   55.48    2.36
  -2   2   0   57.40    2.65
   2   2   0   56.46    2.53
   2   2   0   56.45    2.13
  -4  -2   0    1.41    0.29
   4  -2   0    1.99    0.28
  -4  -2   0    1.35    0.27
   4  -2   0    1.47    0.28
  -4   2   0    1.72    0.23
   4   2   0    1.52    0.36
  -6  -2   0   32.36    1.45
   6  -2   0   37.05    1.20
  -6  -2   0   32.65    1.39
   6   2   0   34.02    1.32
  -6   2   0   31.86    1.48
  -6   2   0   29.92    1.21
   8  -2   0   17.74    1.07
  -8  -2   0   17.25    1.14
   8  -2   0   18.14    1.16
  -8   2   0   20.62    1.64
   8   2   0   19.74    0.96
  10  -2   0    2.19    0.51
 -10  -2   0    2.17    0.61
 -10   2   0    1.85    0.57
  12  -2   0    1.03    0.41
  12   2   0    0.70    0.62
 -12   2   0    0.52    0.47
 -14  -2   0   -0.07    0.39
  14  -2   0   -0.69    0.65
 -14   2   0    0.26    0.38
  14   2   0   -0.63    0.46
  16  -2   0    2.81    0.79
  16   2   0    3.57    0.77
  -1  -3   0  201.39   10.89
   1  -3   0  200.90   14.10
  -3  -3   0   15.27    0.78
   3  -3   0   15.13    0.77
   3  -3   0   16.23    0.68
  -3  -3   0   14.01    0.55
   3   3   0   16.38    0.87
  -3   3   0   15.13    0.73
  -3   3   0   16.53    0.81
   3   3   0   14.76    0.77
   5  -3   0  199.51    8.01
  -5  -3   0  193.46    7.57
  -5  -3   0  194.89    6.36
  -5   3   0  193.02    8.49
  -5   3   0  191.29    8.06
   5   3   0  200.16    8.94
   7  -3   0    0.30    0.34
  -7  -3   0   -0.16    0.29
   7   3   0    1.01    0.39
  -7   3   0    0.35    0.25
  -9  -3   0    3.38    0.56
   9  -3   0    2.64    0.50
   9  -3   0    3.24    0.22
  -9   3   0    3.22    0.64
 -11  -3   0   70.84    2.84
  11  -3   0   74.10    3.13
  11   3   0   73.84    3.16
 -11   3   0   74.89    3.89
 -13  -3   0   -0.09    0.54
  13  -3   0    0.19    0.96
 -13   3   0    0.38    0.44
  13   3   0    0.37    0.49
 -15  -3   0    2.21    0.74
  15   3   0    2.79    2.63
 -15   3   0    2.22    0.58
  -2  -4   0   69.72    3.47
   2  -4   0   72.78    3.56
  -2  -4   0   69.74    2.88
   2  -4   0   70.71    2.81
  -2   4   0   74.35    3.20
   2   4   0   70.04    3.29
   2   4   0   71.85    3.10
  -2   4   0   67.92    3.15
  -2   4   0   71.95    2.72
  -4  -4   0    9.21    0.50
  -4  -4   0   10.16    0.34
  -4  -4   0   10.53    0.49
   4  -4   0   10.39    0.46
   4  -4   0    9.49    0.65
  -4   4   0   10.44    0.51
  -4   4   0   10.56    0.63
   4   4   0    9.93    0.63
   4   4   0   10.30    0.42
   6  -4   0   90.34    3.96
  -6  -4   0   86.48    3.87
  -6  -4   0   86.66    3.59
   6   4   0   88.74    3.77
  -6   4   0   93.22    4.39
  -6   4   0   84.12    4.18
   8  -4   0   60.33    2.13
  -8  -4   0   62.95    2.04
  -8   4   0   64.66    2.95
   8   4   0   64.77    2.61
  10  -4   0    2.08    0.19
 -10  -4   0    1.76    0.42
  10   4   0    2.09    0.58
  12  -4   0   34.34    2.17
 -12  -4   0   34.90    1.71
  12   4   0   33.12    1.65
 -12   4   0   32.59    1.56
 -14  -4   0    6.18    0.88
  14  -4   0    7.59    0.85
  14   4   0    7.74    1.40
 -16  -4   0    3.98    0.67
  16  -4   0    4.74    1.06
  16   4   0    6.61    0.86
 -16   4   0    6.19    0.82
   1  -5   0  237.53   11.61
   1  -5   0  222.95   11.25
  -1  -5   0  224.82   10.94
  -1  -5   0  234.27    9.26
   1   5   0  231.12    7.80
  -1   5   0  231.06   10.46
   1   5   0  225.60   11.63
  -1   5   0  227.61    9.51
  -3  -5   0  336.13   14.32
   3  -5   0  330.21   14.18
  -3  -5   0  327.01   14.08
  -3   5   0  313.74   14.39
   3   5   0  314.98   11.55
  -3   5   0  331.67   11.85
   3   5   0  339.00   12.26
  -3   5   0  330.66   13.29
  -5  -5   0  685.02   24.93
   5  -5   0  685.48   26.74
  -5  -5   0  687.68   30.39
  -5   5   0  692.07   29.45
   5   5   0  684.86   29.77
  -5   5   0  671.71   30.36
   7  -5   0   18.58    1.14
  -7  -5   0   18.01    0.62
  -7   5   0   18.12    0.93
   7   5   0   18.32    0.84
   9  -5   0   93.01    3.30
  -9  -5   0   98.48    3.92
   9   5   0   99.80    2.89
  -9   5   0   92.57    3.96
 -11  -5   0  287.78    9.59
  11  -5   0  281.88   13.27
  11   5   0  278.64    9.09
 -11   5   0  288.97   10.14
 -13  -5   0    4.97    0.75
 -13   5   0    5.01    0.68
  13   5   0    4.64    0.91
 -15  -5   0    0.31    0.40
  15  -5   0    1.29    0.84
 -15   5   0    0.35    0.41
  15   5   0    1.00    0.48
   0  -6   0    4.25    0.24
   0  -6   0    4.45    0.27
   0   6   0    4.12    0.22
   2  -6   0   82.73    3.32
   2  -6   0   79.66    3.70
  -2  -6   0   81.41    4.11
  -2  -6   0   82.52    3.44
   2   6   0   83.16    3.93
  -2   6   0   79.85    3.54
   2   6   0   81.01    3.27
  -2   6   0   83.03    3.70
   4  -6   0  123.31    5.24
  -4  -6   0  117.21    3.62
  -4  -6   0  120.22    4.84
   4   6   0  122.23    4.43
   4   6   0  113.84    4.10
  -4   6   0  121.97    4.03
  -4   6   0  115.78    5.06
  -4   6   0  119.52    4.84
   6  -6   0    0.79    0.28
  -6  -6   0    0.88    0.23
  -6  -6   0    1.55    0.44
  -6   6   0    1.21    0.29
  -6   6   0    0.74    0.31
  -8  -6   0   87.02    3.69
   8  -6   0  100.45    3.69
   8   6   0   95.05    3.13
  -8   6   0   86.81    3.34
  10  -6   0   18.18    0.96
 -10  -6   0   20.78    1.12
  10  -6   0   18.12    0.88
 -10   6   0   20.42    1.12
  10   6   0   18.60    1.26
  12  -6   0    0.50    0.63
 -12  -6   0    0.17    0.35
  12   6   0    0.24    0.66
 -12   6   0   -0.13    0.43
 -14  -6   0   16.97    1.13
  14  -6   0   14.76    1.45
  14   6   0   16.06    1.47
 -14   6   0   16.63    1.45
 -16  -6   0    1.08    0.57
  16  -6   0    1.89    0.56
  16   6   0    2.08    0.73
 -16   6   0    1.35    0.67
   1  -7   0  111.53    5.12
  -1  -7   0  118.85    4.10
  -1  -7   0  107.99    5.60
   1  -7   0  113.15    5.92
  -1   7   0  115.05    4.31
   1   7   0  116.03    5.19
  -1   7   0  110.80    3.69
   1   7   0  110.73    4.36
   3  -7   0   35.84    1.48
  -3  -7   0   37.84    1.29
   3  -7   0   36.56    1.66
  -3  -7   0   37.36    1.50
  -3   7   0   37.16    1.53
   3   7   0   36.07    1.50
  -3   7   0   38.33    1.78
  -3   7   0   36.73    1.30
   3   7   0   38.48    1.39
   5  -7   0   30.35    0.87
  -5  -7   0   33.12    1.17
  -5  -7   0   34.07    1.53
  -5   7   0   32.77    1.05
  -5   7   0   32.68    1.26
   5   7   0   33.81    1.50
  -7  -7   0    0.09    0.45
   7  -7   0    1.09    0.27
  -9  -7   0   48.00    1.98
   9  -7   0   54.93    2.44
  -9   7   0   56.09    2.07
   9   7   0   50.77    1.66
  11  -7   0   12.32    0.93
 -11  -7   0    9.16    1.10
  11   7   0   11.35    0.97
 -11   7   0   13.36    1.05
 -13  -7   0    1.85    0.45
  13  -7   0    1.22    0.47
 -13   7   0    1.68    0.56
  13   7   0    1.36    0.64
 -15  -7   0    0.63    0.44
  15  -7   0    0.83    0.84
  15   7   0    0.13    0.52
   0  -8   0  328.25   13.60
   0  -8   0  336.16   20.59
   0  -8   0  345.18   15.10
   0   8   0  331.59   11.59
   2  -8   0   14.28    0.59
   2  -8   0   15.57    0.73
  -2  -8   0   18.01    0.76
  -2  -8   0   14.03    0.71
   2   8   0   14.67    0.67
  -2   8   0   14.73    0.51
   2   8   0   17.64    0.74
  -2   8   0   14.81    0.58
   4  -8   0   16.48    0.84
  -4  -8   0   16.53    1.51
  -4  -8   0   19.21    1.78
  -4   8   0   15.85    0.71
   4   8   0   15.81    0.83
  -4   8   0   15.89    0.72
  -4   8   0   18.38    0.85
   4   8   0   16.33    1.61
   6  -8   0  251.29   10.36
  -6  -8   0  238.69   12.56
  -6  -8   0  244.46    7.67
  -6  -8   0  238.02   12.35
  -6   8   0  246.35   12.06
  -6   8   0  247.54   11.84
   6   8   0  253.15    7.35
   8  -8   0   30.64    1.39
  -8  -8   0   32.24    1.40
  -8   8   0   34.49    1.49
   8   8   0   34.55    1.23
  10  -8   0   45.67    1.77
 -10  -8   0   42.01    2.72
 -10   8   0   46.19    2.03
  10   8   0   45.74    2.13
  12  -8   0   32.98    2.03
 -12  -8   0   37.27    1.70
 -12   8   0   36.56    1.89
  12   8   0   36.67    1.55
 -14  -8   0    3.63    0.73
 -14   8   0    4.41    0.71
  14   8   0    4.52    0.70
 -16  -8   0   29.98    2.76
  16  -8   0   26.15    2.11
 -16   8   0   27.56    2.66
  16   8   0   26.53    3.28
  -1  -9   0   37.81    1.82
   1  -9   0   37.76    1.83
   1  -9   0   38.94    1.62
  -1  -9   0   39.35    1.14
  -1   9   0   36.67    1.35
   1   9   0   39.33    1.44
  -1   9   0   38.62    1.39
   1   9   0   36.15    1.69
  -3  -9   0  138.56    4.37
   3  -9   0  131.00    5.28
  -3  -9   0  135.44    5.97
   3  -9   0  136.08    6.28
   3   9   0  137.14    6.18
  -3   9   0  139.55    4.07
  -3   9   0  133.16    5.73
   3   9   0  133.25    5.76
  -3   9   0  128.80    5.86
   5  -9   0  277.74   11.23
  -5  -9   0  276.82   15.28
  -5  -9   0  274.45   11.47
  -5   9   0  270.39   10.09
   5   9   0  278.23   12.32
  -5   9   0  268.21    9.52
   7  -9   0   40.59    1.65
  -7  -9   0   39.21    1.44
  -7  -9   0   37.09    1.09
  -7   9   0   40.19    1.61
   7   9   0   42.21    1.64
  -9  -9   0    1.36    0.35
  -9   9   0    1.96    0.48
   9   9   0    1.68    0.63
 -11  -9   0   58.10    2.82
  11  -9   0   58.15    2.91
  11   9   0   60.33    2.38
 -11   9   0   59.93    3.18
  13  -9   0    0.29    0.48
  13   9   0   -0.64    0.56
 -13   9   0    0.47    0.55
  15  -9   0    0.32    0.69
 -15  -9   0    0.59    0.46
  15   9   0    0.44    0.58
 -15   9   0   -0.04    0.64
  -2 -10   0  140.91   10.42
   2 -10   0  143.09    6.00
   2 -10   0  146.42    5.52
  -2 -10   0  142.93   16.38
   2  10   0  148.74   10.88
  -2  10   0  140.68    4.45
  -2  10   0  142.24    4.65
  -4 -10   0   12.85    0.69
   4 -10   0   11.84    0.71
  -4 -10   0   11.63    0.55
   4 -10   0   12.49    0.64
  -4  10   0   11.11    0.61
  -4  10   0   11.59    0.62
   4  10   0   11.87    0.61
  -4  10   0   11.94    0.54
   6 -10   0  186.06    7.17
  -6 -10   0  179.01    8.15
  -6  10   0  174.63   11.38
   6  10   0  187.88    5.26
  -6  10   0  186.19    7.72
  -8 -10   0   85.26    3.48
   8 -10   0   86.76    2.30
  -8 -10   0   87.37    3.25
  -8  10   0   89.83    4.18
   8  10   0   89.90    2.57
 -10 -10   0   37.74    1.45
  10 -10   0   37.29    1.80
  10  10   0   40.23    1.96
 -10  10   0   38.46    1.72
 -12 -10   0   26.74    1.75
  12 -10   0   28.80    1.90
 -12  10   0   25.58    1.72
  12  10   0   33.10    2.11
 -14 -10   0   18.16    1.42
  14 -10   0   20.58    1.40
 -14  10   0   18.87    1.59
  14  10   0   21.07    1.45
 -16 -10   0   13.56    1.64
 -16  10   0   12.82    1.56
  16  10   0   12.54    1.57
  -1 -11   0    0.81    0.24
  -1 -11   0    0.64    0.13
   1 -11   0    0.46    0.22
   1 -11   0    0.78    0.22
  -1  11   0    0.72    0.17
   1  11   0    0.78    0.15
  -1  11   0    0.60    0.20
   1  11   0    0.87    0.22
  -3 -11   0  220.58    6.27
  -3 -11   0  224.57    8.36
   3 -11   0  211.68    9.44
   3 -11   0  219.22    8.66
   3  11   0  221.60    7.95
  -3  11   0  218.94    7.64
   3  11   0  215.76   10.17
  -3  11   0  212.31    8.45
  -5 -11   0   47.39    1.91
   5 -11   0   48.84    1.66
  -5 -11   0   52.25    2.66
  -5  11   0   45.52    1.72
  -5  11   0   43.06    1.98
   5  11   0   49.01    9.56
   7 -11   0   68.41    2.66
  -7 -11   0   65.75    2.12
  -7 -11   0   68.36    2.24
   7  11   0   69.20    2.01
  -7  11   0   67.72    2.79
  -9 -11   0   44.14    1.86
   9 -11   0   38.97    1.88
  -9  11   0   44.53    1.78
   9  11   0   41.32    1.55
 -11 -11   0    1.62    0.57
  11 -11   0    1.05    0.49
 -11  11   0    1.30    0.53
  13 -11   0    6.93    0.88
  13  11   0    6.86    0.80
 -13  11   0    6.32    0.76
 -15 -11   0    8.79    1.02
  15 -11   0    7.56    1.11
  15  11   0    8.70    1.32
 -15  11   0    9.43    1.01
   0 -12   0  629.51   25.28
   0 -12   0  632.02   19.79
   0 -12   0  657.18   28.73
   0  12   0  590.50   24.84
   2 -12   0   93.92    3.41
  -2 -12   0   94.21    4.25
   2 -12   0   96.93    3.82
  -2 -12   0   93.61    2.57
   2  12   0   93.51    3.38
   2  12   0   93.32    2.78
  -2  12   0   91.80    3.95
  -2  12   0   89.56    3.23
  -4 -12   0    2.35    0.27
   4 -12   0    2.73    0.26
  -4  12   0    2.36    0.22
  -4  12   0    1.73    0.39
   4  12   0    2.26    0.30
   6 -12   0  205.75    6.62
  -6 -12   0  204.03    9.78
   6  12   0  210.29    7.19
  -6  12   0  205.49    7.09
   8 -12   0   74.57    2.59
  -8 -12   0   69.03    2.10
  -8 -12   0   73.96    2.22
   8  12   0   74.19    2.85
  -8  12   0   76.08    2.48
  10 -12   0   51.03   30.25
 -10 -12   0   30.05    1.42
 -10  12   0   33.35    8.00
  10  12   0   28.37    1.49
  12 -12   0   29.40    1.67
 -12 -12   0   33.43    1.74
 -12  12   0   32.16    1.89
  12  12   0   32.70    2.06
 -14 -12   0   12.56    1.16
  14 -12   0   14.86    1.51
 -14  12   0   13.13    1.13
  14  12   0   14.30    1.20
  -1 -13   0  102.67    2.87
   1 -13   0  103.43    4.19
   1 -13   0  103.33    4.21
  -1 -13   0  104.98    3.87
   1  13   0  101.89    4.59
  -1  13   0  101.89    5.00
   1  13   0  111.50    4.65
   3 -13   0  204.27    8.74
   3 -13   0  202.63    6.13
  -3 -13   0  204.75    6.42
  -3 -13   0  205.37    8.66
  -3  13   0  194.88    7.10
  -3  13   0  191.32   10.78
   3  13   0  207.70    7.18
   5 -13   0  239.44    9.41
  -5 -13   0  233.58    8.57
  -5 -13   0  230.61   12.37
  -5  13   0  235.24   14.34
   5  13   0  245.34    8.22
  -5  13   0  220.50    8.75
  -7 -13   0    1.11    0.40
   7  13   0    1.36    0.47
  -7  13   0    1.51    0.30
   9 -13   0    6.61    0.68
  -9 -13   0    5.51    0.34
  -9 -13   0    6.86    0.49
   9  13   0    6.10    0.62
  -9  13   0    6.63    0.71
  11 -13   0   96.77    3.80
 -11 -13   0  108.20    4.68
  11  13   0   98.37    3.98
 -11  13   0   99.12    4.67
 -13 -13   0    5.21    0.73
  13 -13   0    4.83    0.76
  13  13   0    4.85    0.81
 -13  13   0    4.99    0.91
  15 -13   0    1.20    0.61
 -15  13   0    1.05    0.40
  15  13   0    0.81    0.47
   0 -14   0  333.18   12.37
   0 -14   0  321.96   13.59
   0 -14   0  325.92   13.14
   0  14   0  333.55   13.76
  -2 -14   0    4.44    0.27
   2 -14   0    5.24    0.34
   2 -14   0    5.50    0.36
  -2 -14   0    5.82    0.71
  -2  14   0    4.95    0.42
   2  14   0    4.49    0.68
  -2  14   0    4.46    0.29
   4 -14   0    7.92    0.62
   4 -14   0    8.32    0.53
  -4 -14   0    7.40    0.54
  -4 -14   0    7.54    0.50
  -4  14   0    7.99    0.35
   4  14   0    7.80    0.58
  -4  14   0    7.71    0.44
   6 -14   0  124.15    3.76
  -6 -14   0  129.39    4.43
   6  14   0  128.04    3.74
  -6  14   0  122.17    4.23
  -8 -14   0    5.59    0.60
   8 -14   0    5.19    0.54
  -8 -14   0    4.50    0.29
  -8  14   0    4.63    0.66
   8  14   0    5.34    0.70
 -10 -14   0   15.95    1.25
  10 -14   0   12.59    1.00
  10  14   0   14.72    0.93
 -10  14   0   16.99    1.15
 -12 -14   0   29.67    2.25
  12 -14   0   33.19    1.53
 -12  14   0   33.55    1.91
  12  14   0   30.71    1.97
 -14 -14   0    1.77    0.47
 -14  14   0    1.45    0.60
  14  14   0    0.78    0.85
   1 -15   0    5.61    0.74
   1 -15   0    5.34    0.34
  -1 -15   0    6.36    0.44
  -1 -15   0    5.50    0.31
   1 -15   0    6.35    0.61
   1  15   0    5.58    0.50
  -1  15   0    5.79    0.38
   1  15   0    6.02    0.48
  -3 -15   0   69.92    2.97
  -3 -15   0   71.56    2.29
   3 -15   0   72.34    2.56
   3 -15   0   73.67    1.92
  -3  15   0   68.24    2.93
   3  15   0   68.49    2.28
  -5 -15   0   43.04    1.39
   5 -15   0   42.00    1.63
   5 -15   0   40.98    1.56
  -5  15   0   42.06    1.68
   5  15   0   42.07    1.46
  -7 -15   0    0.37    0.36
   7 -15   0    0.57    0.28
  -7  15   0    1.31    0.48
   9 -15   0   36.18    1.42
  -9 -15   0   36.38    2.79
  -9 -15   0   41.97    2.31
   9  15   0   38.00    1.64
  -9  15   0   36.34    1.78
  11 -15   0    5.02    0.56
 -11 -15   0    4.27    0.86
  11  15   0    4.55    0.57
 -11  15   0    3.10    0.69
 -13 -15   0    1.05    0.50
  13 -15   0    1.89    0.44
 -13  15   0    1.65    0.50
  13  15   0    1.22    0.55
 -15 -15   0    1.91    0.75
  15  15   0    1.29    0.55
   0 -16   0    1.35    1.33
   0 -16   0    1.17    1.33
   0  16   0    1.31    0.21
  -2 -16   0   39.06    1.30
   2 -16   0   36.05    1.43
  -2 -16   0   35.90    1.38
   2 -16   0   36.38    1.42
  -2  16   0   35.15    1.83
   2  16   0   37.13    1.43
   4 -16   0   22.81    0.74
  -4 -16   0   24.09    1.08
   4 -16   0   25.38    1.00
   4  16   0   24.36    0.87
  -4  16   0   23.02    1.58
   6 -16   0    0.51    0.26
  -6 -16   0    0.82    0.37
   6  16   0    0.54    0.46
  -6  16   0    0.40    0.44
   8 -16   0   28.90    1.62
  -8 -16   0   34.43    1.56
   8  16   0   28.15    1.24
  -8  16   0   31.14    1.34
 -10 -16   0   19.90    1.26
  10 -16   0   19.83    1.37
  10  16   0   17.02    0.97
 -10  16   0   16.41    1.11
 -12 -16   0    2.03    0.65
  12 -16   0    1.71    0.51
 -12  16   0    1.65    0.49
 -14 -16   0    4.76    0.87
  14 -16   0    6.37    0.88
 -14  16   0    5.66    0.73
   1 -17   0  333.43   11.95
   1 -17   0  314.51   11.00
  -1 -17   0  313.24   10.46
  -1 -17   0  326.07   11.62
   1 -17   0  315.95   13.25
  -3 -17   0  166.98    5.98
  -3 -17   0  154.87    9.45
   3 -17   0  164.07    5.39
   3 -17   0  163.26    4.61
   3  17   0  165.32    5.88
  -3  17   0  152.15    9.38
   5 -17   0  306.76   11.16
   5 -17   0  281.40   11.08
  -5 -17   0  296.19   10.12
   5  17   0  306.55    8.36
  -5  17   0  304.06   10.41
  -7 -17   0    0.61    0.32
   7 -17   0    0.81    0.38
   7  17   0    0.41    0.32
  -7  17   0    1.11    0.35
  -9 -17   0   39.45    4.14
  -9 -17   0   38.45    1.84
   9 -17   0   40.98    1.55
  -9  17   0   42.23    1.43
   9  17   0   44.83    1.98
  11 -17   0  191.08    9.16
 -11 -17   0  172.72    7.71
 -11  17   0  182.60    8.95
  11  17   0  175.96    9.45
 -13 -17   0    1.49    0.51
  13 -17   0    1.14    0.40
  13  17   0    0.82    0.61
 -13  17   0    1.13    0.41
  15 -17   0   -0.64    0.67
 -15 -17   0    1.02    0.56
  15  17   0    1.53    0.71
   0 -18   0  226.31    8.78
   0 -18   0  210.64    6.15
   0 -18   0  225.27    9.01
  -2 -18   0   72.42    2.98
   2 -18   0   75.64    3.02
   2 -18   0   72.85    2.36
  -2 -18   0   72.00    3.94
   2  18   0   76.72    2.66
   4 -18   0    1.36    0.24
   4 -18   0    1.51    0.31
   4  18   0    1.62    0.28
   6 -18   0   48.89    1.88
  -6 -18   0   51.45    7.12
  -6  18   0   45.36    2.02
   6  18   0   69.31   13.21
   8 -18   0  115.70    4.46
  -8 -18   0  116.19    3.64
   8  18   0  115.08    5.00
  -8  18   0  114.08    4.34
 -10 -18   0    9.57    0.73
  10 -18   0   10.20    1.04
  10  18   0    8.89    0.88
 -10  18   0    8.87    0.67
  12 -18   0    5.40    0.82
 -12 -18   0    4.57    0.83
  12  18   0    5.74    0.69
 -12  18   0    4.27    0.77
 -14 -18   0    8.53    1.34
  14 -18   0    8.11    1.17
 -14  18   0    9.59    1.22
  14  18   0    6.73    0.96
   1 -19   0   33.21    1.53
   1 -19   0   34.67    1.07
  -1 -19   0   32.83    1.26
  -1 -19   0   32.21    1.48
  -1 -19   0   34.18    1.59
   1 -19   0   32.70    1.67
   3 -19   0    3.20    0.31
   3 -19   0    4.21    0.41
  -3 -19   0    3.50    0.41
   3  19   0    3.52    0.39
   5 -19   0   73.40    2.36
  -5 -19   0   78.66    2.89
   5 -19   0   73.88    2.92
   5  19   0   73.69    1.78
  -5  19   0   72.28    2.00
  -7 -19   0   21.54    1.08
   7 -19   0   25.67    0.97
   7  19   0   26.52    1.04
  -7  19   0   23.25    1.02
  -9 -19   0    0.42    0.58
   9 -19   0    0.81    0.35
   9  19   0   -0.09    0.33
  -9  19   0    0.50    0.49
  11 -19   0   22.62    1.57
 -11 -19   0   21.85    1.61
  11  19   0   21.06    1.56
 -11  19   0   21.90    1.42
  13 -19   0    0.82    0.65
  13  19   0    0.73    0.68
 -13  19   0    1.26    0.37
   0 -20   0   63.18    2.93
   0 -20   0   63.82    2.55
   0 -20   0   65.83    2.67
   2 -20   0   18.64    0.81
   2 -20   0   20.20    0.85
  -2 -20   0   20.15    0.84
   2  20   0   18.00    0.60
   4 -20   0   24.20    1.00
  -4 -20   0   24.06    0.92
   4 -20   0   24.56    1.25
   4  20   0   24.63    1.30
   6 -20   0   11.25    0.66
   6 -20   0   10.16    0.68
  -6 -20   0   11.35    0.84
  -6  20   0   11.49    0.77
   6  20   0    9.48    0.73
  -8 -20   0    1.78    0.41
   8 -20   0    2.35    0.42
   8  20   0    2.59    0.40
  -8  20   0    1.85    0.33
  10 -20   0   11.16    0.80
 -10 -20   0   11.73    0.95
  10  20   0   10.05    1.04
 -10  20   0    9.97    0.86
 -12 -20   0    1.75    0.56
  12 -20   0    1.88    0.81
 -12  20   0    1.64    0.51
  12  20   0    2.30    0.68
 -14 -20   0    2.49    0.82
  14 -20   0    2.27    0.60
 -14  20   0    2.43    0.69
  14  20   0    2.82    0.62
  -1 -21   0    2.58    0.33
   1 -21   0    3.05    0.37
  -1 -21   0    3.05    0.32
   1 -21   0    3.07    0.40
   3 -21   0   36.56    1.33
   3 -21   0   35.38    1.32
  -3 -21   0   34.75    1.14
   3  21   0   35.07    1.20
  -5 -21   0    0.41    0.39
   5 -21   0    1.17    0.51
   5  21   0    0.59    0.32
  -5  21   0    0.72    0.27
  -7 -21   0    5.06    0.71
   7 -21   0    4.66    1.92
  -7  21   0    5.62    1.67
   7  21   0    4.07    0.81
  -9 -21   0   13.36    0.90
   9 -21   0   11.82    0.80
  -9  21   0   13.47    1.21
   9  21   0   13.91    0.89
  11 -21   0    0.53    0.52
 -11 -21   0    1.36    0.44
  11  21   0    0.94    0.62
 -11  21   0    1.19    0.35
 -13 -21   0    1.09    0.44
  13 -21   0    1.10    0.48
 -13  21   0    0.19    0.54
  13  21   0    0.14    0.56
   0 -22   0  831.26   29.69
   0 -22   0  852.95   30.69
  -2 -22   0   11.49    0.53
   2 -22   0   11.44    0.65
   2 -22   0   12.34    0.64
  -4 -22   0    0.47    0.45
   4 -22   0    0.53    0.37
   4  22   0    0.28    0.46
  -6 -22   0  303.67    9.13
   6 -22   0  287.42   10.35
   6 -22   0  295.15   12.72
  -6  22   0  299.17   11.70
   6  22   0  290.79    8.67
   8 -22   0   92.07   13.45
  -8 -22   0   82.20    4.04
  -8  22   0   80.60    6.28
   8  22   0   84.84    3.16
 -10 -22   0   21.90    1.11
  10 -22   0   19.20    1.46
  10  22   0   19.54    1.13
 -10  22   0   20.20    1.41
 -12 -22   0   40.75    2.74
  12 -22   0   39.34    2.61
 -12  22   0   39.63    1.79
  12  22   0   36.97    2.73
 -14 -22   0   25.25    2.97
  14 -22   0   24.62    2.55
  14  22   0   24.44    2.37
 -14  22   0   26.63    2.96
   1 -23   0   17.84    0.73
  -1 -23   0   17.51    0.62
  -1 -23   0   17.21    0.87
   1 -23   0   19.09    0.92
   3 -23   0   91.96    3.18
  -3 -23   0   88.05    3.03
   3 -23   0   87.70    2.90
   3  23   0   91.31    2.53
   5 -23   0    7.00    0.55
  -5 -23   0    6.73    0.61
   5 -23   0    7.14    0.54
  -5  23   0    6.84    0.80
   5  23   0    5.88    0.44
   7 -23   0   22.59    1.18
  -7 -23   0   22.23    1.16
   7  23   0   23.70    1.11
  -7  23   0   22.80    1.12
   9 -23   0   40.58    2.15
  -9 -23   0   34.55    1.60
  -9  23   0   41.17    1.97
   9  23   0   36.53    2.22
 -11 -23   0   11.02    0.88
  11 -23   0    9.68    1.31
 -11  23   0    9.56    1.07
  11  23   0   11.16    1.00
  13 -23   0   13.52    1.70
 -13  23   0   14.41    1.34
  13  23   0   15.82    1.44
   0 -24   0   16.59    2.09
   0 -24   0   16.26    1.68
  -2 -24   0    4.56    0.34
   2 -24   0    5.39    0.58
  -2 -24   0    5.52    0.47
   2 -24   0    5.49    0.42
   4 -24   0    3.32    0.50
  -4 -24   0    3.34    0.41
   4 -24   0    3.72    0.43
   4  24   0    3.10    0.47
  -6 -24   0    3.03    0.57
   6 -24   0    3.09    0.70
   6 -24   0    3.35    0.75
  -6  24   0    2.86    0.62
   6  24   0    2.95    0.49
  -8 -24   0    7.27    0.68
   8 -24   0    8.13    0.53
   8  24   0    7.59    0.72
  -8  24   0    6.54    0.56
 -10 -24   0    1.69    0.54
  10  24   0    1.99    0.53
  12 -24   0   -0.26    0.71
 -12 -24   0    0.75    0.71
  12  24   0   -0.20    0.47
 -12  24   0    0.20    0.31
   1 -25   0   71.43    2.53
  -1 -25   0   71.55    2.44
   1 -25   0   72.31    2.25
  -1 -25   0   74.87    2.09
   3 -25   0    1.19    0.43
  -3 -25   0    0.51    0.37
   3 -25   0    0.68    0.23
  -5 -25   0   65.52    1.91
   5 -25   0   69.19    2.53
   5 -25   0   66.10    2.17
  -5  25   0   63.86    2.55
   5  25   0   67.81    2.61
  -7 -25   0    2.66    0.55
   7 -25   0    1.47    0.55
  -7  25   0    1.88    0.40
   9 -25   0    0.17    0.33
  -9 -25   0    0.08    0.51
  -9  25   0    0.06    0.49
   9  25   0    0.71    0.50
 -11 -25   0   44.11    2.55
  11 -25   0   41.25    3.62
  11  25   0   42.20    3.32
 -11  25   0   43.13    3.38
  13 -25   0   -0.11    0.46
 -13 -25   0   -0.35    0.45
  13  25   0    0.50    0.49
 -13  25   0    0.48    0.35
   0 -26   0    1.12    0.47
   0 -26   0    0.94    0.25
  -2 -26   0    7.85    0.57
   2 -26   0    9.07    0.50
  -2 -26   0    7.26    0.42
   2 -26   0    8.35    0.60
   4 -26   0    2.26    0.32
   4 -26   0    1.72    0.45
  -4 -26   0    2.01    0.33
   4  26   0    2.47    0.33
  -6 -26   0   41.36    1.88
   6 -26   0   45.52    1.61
   6 -26   0   40.57    1.64
  -6  26   0   41.24    2.10
   6  26   0   40.93    1.80
   8 -26   0    0.25    0.48
  -8 -26   0    0.37    0.56
   8  26   0    0.35    0.56
  -8  26   0    0.14    0.25
 -10 -26   0    0.33    0.44
  10 -26   0    0.50    0.44
 -10  26   0    0.30    0.29
  10  26   0   -0.65    0.50
 -12 -26   0   12.65    1.12
  12 -26   0   16.74    1.58
 -12  26   0   15.47    1.48
  12  26   0   11.90    1.63
  -1 -27   0   44.74    1.99
   1 -27   0   41.11    1.43
   1 -27   0   41.56    1.46
  -1 -27   0   43.85    1.45
  -3 -27   0  141.77    4.54
   3 -27   0  141.32    4.53
   3 -27   0  151.77    4.68
  -3 -27   0  143.98    8.39
   5 -27   0  182.50    6.87
   5 -27   0  191.25    6.71
  -5 -27   0  181.35    6.84
   5  27   0  184.29    6.98
  -5  27   0  181.49    6.49
  -7 -27   0    4.05    0.56
   7 -27   0    5.17    0.62
   7  27   0    3.80    0.52
  -7  27   0    3.97    0.60
  -9 -27   0   14.70    0.95
   9 -27   0   13.99    1.06
  -9  27   0   13.90    0.89
   9  27   0   13.83    1.30
 -11 -27   0   90.88    7.55
  11 -27   0   82.25    7.89
  11  27   0   85.70    6.77
 -11  27   0   88.72    8.29
   0 -28   0    7.41    0.67
   0 -28   0    8.40    0.62
   2 -28   0   64.36    2.73
  -2 -28   0   62.67    2.31
   2 -28   0   63.78    2.47
  -2 -28   0   66.96    2.45
   4 -28   0   25.63    1.39
  -4 -28   0   24.10    1.24
   4 -28   0   23.21    1.11
   4  28   0   25.50    1.20
   6 -28   0    0.59    0.35
   6 -28   0    1.13    0.52
  -6 -28   0   -0.20    0.45
   6  28   0    0.55    0.59
  -6  28   0    0.56    0.35
   8 -28   0   31.42    1.63
  -8 -28   0   35.37    1.89
   8  28   0   32.23    2.43
  -8  28   0   34.05    2.33
  10 -28   0    2.48    0.74
 -10 -28   0    2.56    0.46
  10  28   0    2.34    0.47
 -12 -28   0    2.74    0.47
 -12  28   0    2.40    0.47
   1 -29   0   25.06    1.41
   1 -29   0   28.26    1.25
  -1 -29   0   24.22    1.18
  -1 -29   0   26.89    1.42
  -3 -29   0   12.97    0.83
  -3 -29   0   14.43    0.72
   3 -29   0   12.84    0.71
   3 -29   0   13.03    0.71
   5 -29   0   11.34    0.60
  -5 -29   0   12.24    0.64
   5 -29   0   11.38    0.92
  -5  29   0   12.59    0.73
   5  29   0   12.55    0.78
  -7 -29   0    0.20    0.47
   7 -29   0    0.28    0.37
   7  29   0    0.64    0.44
  -7  29   0    0.39    0.50
  -9 -29   0    4.87    0.87
   9  29   0    4.65    0.89
  -9  29   0    5.18    0.81
  11 -29   0    3.02    0.70
 -11 -29   0    3.11    0.70
 -11  29   0    1.72    0.45
  11  29   0    2.31    0.64
   0 -30   0  135.82    4.33
   0 -30   0  139.46    6.56
  -2 -30   0   10.39    0.54
  -2 -30   0   10.03    0.63
   2 -30   0   10.23    0.52
   4 -30   0    8.99    0.72
   4 -30   0    9.67    0.97
  -4 -30   0    9.63    0.60
   6 -30   0   61.91    3.48
   6 -30   0   62.03    4.06
  -6 -30   0   65.46    3.41
   6  30   0   66.41    3.98
  -6  30   0   70.87    4.23
   8 -30   0   16.80    1.27
  -8 -30   0   16.89    1.43
  -8  30   0   18.01    1.07
   8  30   0   15.74    1.30
 -10 -30   0   32.10    2.70
  10 -30   0   31.57    2.05
  10  30   0   34.48    2.62
 -10  30   0   35.07    2.84
  -1 -31   0   30.22    1.63
   1 -31   0   29.44    1.29
  -1 -31   0   29.97    1.33
   1 -31   0   30.04    1.63
  -3 -31   0    0.34    0.36
  -3 -31   0    0.10    0.39
   3 -31   0    0.57    0.33
   3 -31   0   -0.08    0.44
   5 -31   0    9.50    1.12
  -5 -31   0   10.96    0.68
   5 -31   0   13.12    1.19
  -5  31   0   11.60    1.12
   5  31   0   11.93    0.94
   7 -31   0   27.77    1.77
  -7 -31   0   25.55    1.46
   7  31   0   24.23    1.31
  -7  31   0   27.08    2.21
  -9 -31   0    1.04    0.63
   9 -31   0    0.67    0.44
  -9  31   0    1.01    0.31
   9  31   0    1.13    0.50
  11 -31   0    8.60    0.99
 -11 -31   0    9.26    0.80
 -11  31   0   10.12    1.14
  11  31   0   10.08    1.16
   0 -32   0   48.77    2.77
   0 -32   0   47.78    2.62
  -2 -32   0   23.81    1.18
   2 -32   0   23.19    1.21
   2 -32   0   22.98    1.19
  -2 -32   0   22.29    1.53
  -4 -32   0    1.90    0.56
  -4 -32   0    1.55    0.54
   4 -32   0    1.19    0.35
   6 -32   0   49.46    3.02
  -6 -32   0   48.98    2.87
   6 -32   0   44.15    2.19
   6  32   0   50.34    2.61
  -6  32   0   54.10    2.95
  -8 -32   0   18.96    1.43
   8 -32   0   18.45    1.58
   8  32   0   18.73    1.43
  -8  32   0   18.62    2.46
 -10 -32   0    3.73    0.87
  10 -32   0    3.17    0.53
 -10  32   0    2.29    0.38
  10  32   0    2.61    0.56
   1 -33   0    3.96    0.50
   1 -33   0    3.84    0.45
  -1 -33   0    3.94    0.52
  -1 -33   0    4.50    0.55
  -3 -33   0   28.43    1.58
   3 -33   0   35.60    5.12
  -3 -33   0   28.77    1.33
   3 -33   0   39.97    6.29
  -5 -33   0    7.33    0.79
   5 -33   0    9.14    0.90
  -5 -33   0    9.96    0.91
   5 -33   0    7.26    0.63
  -5  33   0    7.84    1.10
   7 -33   0    5.85    0.63
  -7 -33   0    7.07    0.74
   7 -33   0    8.77    1.09
   7  33   0    7.90    0.83
  -7  33   0    8.71    1.02
   9 -33   0   18.27    1.96
  -9 -33   0   17.45    1.42
  -9  33   0   18.26    2.25
   9  33   0   18.04    1.79
   0 -34   0   69.35    4.86
   0 -34   0   65.53    4.07
  -2 -34   0    3.11    0.49
  -2 -34   0    3.37    0.46
   2 -34   0    2.61    0.49
   2 -34   0    2.92    0.43
  -4 -34   0    0.34    0.36
   4 -34   0    0.21    0.46
  -4 -34   0    0.06    0.31
   4 -34   0    0.27    0.51
   6 -34   0   40.36    3.05
   6 -34   0   44.17    2.29
  -6 -34   0   42.65    2.58
   6  34   0   40.85    2.76
  -6  34   0   41.48    4.06
  -8 -34   0    6.27    0.90
   8 -34   0    6.31    0.65
   8  34   0    4.03    0.91
   1 -35   0   13.31    1.08
   1 -35   0   12.07    0.90
  -1 -35   0   13.92    1.00
  -1 -35   0   12.54    0.97
  -3 -35   0   31.71    2.27
   3 -35   0   33.72    2.33
   3 -35   0   37.67    2.32
  -3 -35   0   34.62    2.45
   5 -35   0   50.33    3.67
   5 -35   0   52.59    3.27
  -5 -35   0   56.31    4.74
  -5 -35   0   58.91    2.96
  -5  35   0   52.42    4.71
   7 -35   0   -0.14    0.38
  -7 -35   0    1.20    0.56
   7  35   0   -0.61    0.62
   0 -36   0   23.15    2.01
   0 -36   0   28.61    2.09
   2 -36   0    1.62    0.35
   2 -36   0    2.08    0.47
  -2 -36   0    2.45    0.41
  -4 -36   0    4.35    0.65
   4 -36   0    4.36    0.65
   4 -36   0    5.12    0.65
  -4 -36   0    4.92    0.60
  -6 -36   0   22.60    2.25
   6 -36   0   22.28    2.58
  -6 -36   0   23.96    1.86
   6 -36   0   24.41    1.83
  -6  36   0   24.04    1.95
   8 -36   0    1.87    0.54
  -8 -36   0    1.60    0.60
  -8  36   0    1.75    0.55
   8  36   0    1.86    0.42
   1 -37   0    0.32    0.42
  -1 -37   0    0.58    0.28
   1 -37   0    0.95    0.48
  -1 -37   0   -0.17    0.43
  -3 -37   0   16.51    1.30
   3 -37   0   16.77    1.33
  -3 -37   0   16.08    1.66
   3 -37   0   15.46    1.29
   5 -37   0    2.75    0.72
  -5 -37   0    3.35    0.53
  -5  37   0    2.68    0.58
   7 -37   0    0.51    0.41
  -7 -37   0    0.02    0.41
  -7  37   0   -0.13    0.42
   0 -38   0    1.46    0.52
   0 -38   0    0.35    0.32
  -2 -38   0    6.35    0.69
  -2 -38   0    4.54    0.65
   2 -38   0    4.15    0.69
   2 -38   0    6.47    0.59
  -4 -38   0    2.33    0.70
   4 -38   0    2.01    0.72
  -4 -38   0    3.37    0.56
   4 -38   0    2.47    0.62
   6 -38   0    0.27    0.36
  -6 -38   0    0.51    0.42
  -6 -38   0   -0.35    0.52
   6 -38   0    0.33    0.37
  -6  38   0    0.35    0.33
  -1 -39   0   40.67    4.00
   1 -39   0   46.07    2.63
   1 -39   0   42.92    2.15
  -1 -39   0   42.32    4.56
   3 -39   0   12.56    1.03
  -3 -39   0   12.38    1.41
   3 -39   0   10.40    1.27
  -3 -39   0   12.99    0.99
  -5 -39   0   46.90    3.80
   5 -39   0   45.37    4.93
   5 -39   0   45.31    4.14
  -5 -39   0   44.60    3.65
  -5  39   0   46.32    6.36
   0 -40   0   53.57    4.99
   0 -40   0   54.00    4.92
  -2 -40   0   13.63    1.68
  -2 -40   0   11.90    1.11
   2 -40   0   15.03    2.03
   2 -40   0   16.84    2.16
   4 -40   0    1.26    0.42
   4 -40   0    1.80    0.54
  -4 -40   0    0.80    0.50
   1 -41   0    4.93    0.89
  -1 -41   0    5.50    0.77
   1 -41   0    5.14    0.75
  -1 -41   0    4.87    0.93
  16   0  -1    0.48    0.42
 -16   0   1   -0.52    0.38
  14   0  -1    0.89    0.56
 -12   0   1   -0.08    0.31
  12   0  -1    0.13    0.33
 -10   0   1    0.32    0.33
  10   0  -1   -0.38    0.41
   8   0  -1    0.32    0.38
  -8   0   1   -0.26    0.29
   6   0  -1    0.29    0.26
  -6   0   1    0.24    0.22
   4   0  -1   -0.49    0.22
  -4   0   1   -0.66    0.23
  -4   0   1   -0.52    0.12
  -4   0   1   -0.64    0.14
   4   0  -1   -0.69    0.19
  -2   0   1    0.73    0.11
   2   0  -1    0.71    0.12
   0   0   1    0.30    0.09
   0   0   1    0.22    0.09
  -2   0  -1   -0.24    0.22
  -2   0  -1   -0.38    0.12
   2   0   1   -0.31    0.23
  -4   0  -1    0.01    0.25
   4   0   1   -0.25    0.21
   4   0   1   -0.61    0.26
   6   0   1    0.07    0.45
   8   0   1    0.14    0.09
  -8   0  -1    0.11    0.40
   8   0   1   -0.50    0.36
  10   0   1   -0.09    0.48
  12   0   1   -0.02    0.50
 -12   0  -1    0.60    0.54
  14   0   1    0.32    0.54
 -16   0  -1   -0.86    0.59
  16   0   1   -0.41    0.43
  15  -1  -1    7.17    1.07
 -15  -1   1    9.14    0.97
 -15   1   1    7.11    0.83
  15   1  -1    9.49    0.92
  13  -1  -1   77.32    4.05
 -13  -1   1   80.50    4.25
 -13   1   1   79.50    4.26
  13   1  -1   76.73    3.95
  11  -1  -1    4.08    0.50
 -11  -1   1    5.32    0.71
 -11   1   1    4.89    0.63
  11   1  -1    4.11    0.72
   9  -1  -1   51.36    2.33
  -9  -1   1   50.20    1.98
  -9   1   1   51.74    1.80
   9   1  -1   54.01    2.12
  -7  -1   1  359.29   12.06
  -7  -1   1  361.40   24.98
   7  -1  -1  373.31   16.93
   7   1  -1  371.57   14.47
  -7   1   1  363.33   11.39
  -7   1   1  365.10   15.72
   5  -1  -1   38.26    1.51
  -5  -1   1   34.47    1.62
   5  -1  -1   35.69    1.82
  -5  -1   1   36.14    1.49
  -5  -1   1   34.75    1.46
  -5   1   1   35.86    1.22
  -5   1   1   34.40    1.49
   5   1  -1   37.33    1.59
   5   1  -1   33.37    1.50
  -3  -1   1   29.44    1.35
   3  -1  -1   31.43    1.44
   3  -1  -1   29.63    1.08
  -3  -1   1   29.35    1.39
   3  -1  -1   29.99    1.15
   3   1  -1   30.19    1.35
  -3   1   1   29.76    1.27
  -3   1   1   30.69    1.22
   3   1  -1   30.90    1.42
  -3   1   1   31.17    1.18
   1  -1   1   11.79    0.52
  -1  -1  -1   11.97    0.52
  -1   1  -1   11.86    0.61
   1   1   1   11.90    0.59
  -1   1  -1   12.43    0.52
   3   1   1  819.43   30.93
  -3   1  -1  832.80   24.95
  -5  -1  -1  534.75   16.62
  -5  -1  -1  517.86   23.49
   5  -1   1  533.56   22.98
  -5   1  -1  510.15   25.14
  -5   1  -1  530.66   15.32
   5   1   1  528.31   23.66
  -7  -1  -1  139.92    6.41
   7  -1   1  141.75    5.78
   7   1   1  148.70    4.71
  -7   1  -1  142.31    6.58
   7   1   1  142.80    5.38
   9  -1   1  102.92    4.85
   9  -1   1  113.26    3.37
  -9  -1  -1  113.40    4.32
  -9   1  -1  106.43    4.95
   9   1   1  110.77    4.01
 -11  -1  -1   14.34    1.09
  11  -1   1   14.55    0.79
 -11   1  -1   16.58    1.03
  11   1   1   17.73    1.25
  13  -1   1   18.96    1.29
 -13  -1  -1   21.13    1.86
  13   1   1   19.65    1.59
 -13   1  -1   17.62    1.18
  15  -1   1   31.39    2.05
 -15  -1  -1   33.12    2.68
  15   1   1   33.48    2.72
 -15   1  -1   34.86    2.98
  16  -2  -1    8.52    1.24
 -16  -2   1    9.53    1.45
  16   2  -1    9.48    1.03
 -16   2   1    9.02    1.10
 -14  -2   1    1.28    0.47
  14  -2  -1    1.51    0.69
  14   2  -1    1.28    0.42
  12  -2  -1    0.64    0.49
 -12  -2   1    0.85    0.67
  12   2  -1    1.02    0.60
 -10  -2   1   55.61    2.40
  10  -2  -1   49.01    2.31
  10   2  -1   55.35    2.32
 -10   2   1   53.40    2.81
  -8  -2   1    1.71    0.32
   8  -2  -1    1.30    0.49
  -8   2   1    1.67    0.39
   8   2  -1    1.90    0.42
   6  -2  -1    8.86    0.41
   6  -2  -1   10.25    0.51
  -6  -2   1    9.00    0.47
  -6  -2   1    8.19    0.55
  -6   2   1    9.19    0.58
  -6   2   1    8.87    0.55
   6   2  -1    9.46    0.53
   4  -2  -1  140.11    6.57
  -4  -2   1  143.43    5.42
   4  -2  -1  141.83    9.53
  -4  -2   1  138.33    4.63
   4  -2  -1  137.90    6.59
  -4   2   1  137.55    5.37
   4   2  -1  133.85    4.82
   4   2  -1  141.87    7.97
  -4   2   1  137.80    4.92
   2  -2  -1    1.66    0.20
   2  -2  -1    1.64    0.11
  -2  -2   1    1.61    0.16
   2  -2  -1    1.69    0.17
  -2  -2   1    2.02    0.13
  -2   2   1    1.83    0.17
   2   2  -1    2.00    0.14
  -2   2   1    1.54    0.15
   2   2  -1    1.82    0.14
  -2   2   1    1.95    0.21
   0  -2  -1   92.09    4.24
   0  -2  -1   92.29    3.28
   0  -2   1   87.69    4.49
   0  -2   1   88.00    3.66
   0   2  -1   93.06    3.51
   0   2   1   92.09    5.20
   0   2  -1   92.39    3.82
  -2  -2  -1  152.79    6.92
  -2  -2  -1  154.62    6.93
   2  -2   1  156.37    6.38
  -2   2  -1  155.57    5.34
   2   2   1  148.84    6.16
   2   2   1  150.47    7.26
  -2   2  -1  151.17    5.57
   2   2   1  153.56    6.07
  -4  -2  -1    4.15    0.42
   4  -2   1    3.26    0.30
  -4  -2  -1    3.29    0.33
   4   2   1    3.56    0.20
   4   2   1    3.30    0.29
   4   2   1    3.48    0.43
  -4   2  -1    3.51    0.25
  -4   2  -1    3.22    0.41
  -6  -2  -1   36.88    1.59
   6  -2   1   33.19    1.99
  -6  -2  -1   32.87    1.33
   6   2   1   35.67    1.34
  -6   2  -1   32.90    1.47
   6   2   1   33.57    1.62
  -6   2  -1   33.10    1.78
   8  -2   1   37.50    1.42
  -8  -2  -1   36.95    1.53
   8   2   1   38.00    1.80
  -8   2  -1   34.89    1.73
 -10  -2  -1    2.39    0.58
  10  -2   1    1.49    0.08
  10   2   1    2.26    0.60
 -10   2  -1    1.82    0.54
 -12  -2  -1   13.46    1.02
  12  -2   1   10.06    1.10
 -12   2  -1   11.70    1.17
  12   2   1   12.74    1.15
  14  -2   1    6.55    0.89
  14   2   1    7.04    0.84
 -14   2  -1    7.49    0.84
  16  -2   1   -0.02    0.55
 -16  -2  -1   -0.58    0.54
  16   2   1   -0.86    0.48
 -16   2  -1    0.78    0.54
  15  -3  -1   12.77    1.12
 -15  -3   1   14.13    1.42
 -15   3   1   16.43    1.60
  15   3  -1   12.11    1.02
 -13  -3   1    9.80    0.99
  13  -3  -1   14.34    1.07
  13   3  -1   12.97    1.27
 -13   3   1   11.80    0.93
 -11  -3   1    4.23    0.85
  11  -3  -1    3.86    0.63
  11   3  -1    3.08    0.45
 -11   3   1    1.70    1.57
   9  -3  -1   12.97    0.87
  -9  -3   1   14.66    0.89
  -9   3   1   11.07    0.82
   9   3  -1   12.19    0.83
   7  -3  -1  119.80    4.74
  -7  -3   1  120.63    3.90
   7  -3  -1  121.43    5.17
  -7   3   1  119.14    4.29
  -7   3   1  119.07    5.88
   7   3  -1  121.98    4.98
   5  -3  -1  180.08   11.72
  -5  -3   1  181.01    7.05
  -5  -3   1  183.64    5.23
   5  -3  -1  180.85    7.30
   5  -3  -1  194.05    9.24
  -5   3   1  189.77    6.75
  -5   3   1  184.28    8.52
   5   3  -1  189.34    8.02
   3  -3  -1   86.13    3.29
  -3  -3   1   91.60    3.93
   3  -3  -1   88.02    3.26
   3  -3  -1   87.21    4.17
  -3  -3   1   90.65    3.34
  -3   3   1   88.70    3.97
   3   3  -1   93.87    4.76
  -3   3   1   88.97    3.93
   3   3  -1   87.58    2.62
  -1  -3   1  148.26    6.41
   1  -3  -1  141.38    5.96
  -1  -3   1  140.33    6.41
  -1   3   1  138.39    6.70
   1   3  -1  144.07    6.59
   1   3  -1  146.88    6.33
   1  -3   1  320.99   16.99
   1  -3   1  329.74   16.20
  -1  -3  -1  324.23   18.05
   1   3   1  325.91   17.85
   1   3   1  320.63   12.45
  -1   3  -1  330.65   12.86
  -1   3  -1  324.20   14.10
   3  -3   1    9.25    0.62
  -3  -3  -1   10.34    0.47
   3   3   1   10.21    0.45
   3   3   1   10.14    0.50
  -3   3  -1    8.95    0.46
  -3   3  -1    9.13    0.64
   3   3   1    9.36    0.45
  -3   3  -1   10.05    0.47
   5  -3   1   59.26    1.67
  -5  -3  -1   52.81    2.05
  -5  -3  -1   51.31    1.94
   5   3   1   55.85    2.08
   5   3   1   51.42    1.53
  -5   3  -1   55.10    2.30
  -5   3  -1   56.35    2.36
   7  -3   1   93.48    3.76
  -7  -3  -1   94.51    3.30
   7   3   1   97.25    3.50
  -7   3  -1   88.39    3.57
   9  -3   1   10.05    0.97
  -9  -3  -1    8.59    0.74
   9   3   1    9.35    0.97
  -9   3  -1    8.03    0.79
  11  -3   1    0.34    0.68
 -11  -3  -1    0.39    0.34
  11   3   1    0.37    0.42
 -11   3  -1    0.06    0.36
 -13  -3  -1   18.25    1.31
  13  -3   1   20.03    1.36
 -13   3  -1   21.62    1.47
  13   3   1   18.92    1.18
  15  -3   1    7.48    1.13
 -15  -3  -1    8.58    0.95
 -15   3  -1    8.23    1.12
  15   3   1   10.35    1.06
 -16  -4   1    1.20    0.54
  16  -4  -1   -0.09    0.39
  16   4  -1    0.59    0.57
 -16   4   1    0.07    0.44
  14  -4  -1    1.28    0.59
  14   4  -1    0.29    0.66
 -14   4   1    0.47    0.40
  12  -4  -1  153.63    6.49
 -12  -4   1  155.27    6.96
 -12   4   1  148.98    5.09
  12   4  -1  147.33    6.57
  10  -4  -1   85.46    3.88
 -10  -4   1   80.74    3.20
 -10   4   1   80.43    2.89
  10   4  -1   84.76    3.05
  -8  -4   1  131.72    4.05
   8  -4  -1  138.52    4.53
   8  -4  -1  132.71    4.90
   8   4  -1  134.35    3.45
  -8   4   1  134.57    5.12
  -6  -4   1  255.28   10.38
  -6  -4   1  261.30   11.21
  -6  -4   1  264.80   11.85
   6  -4  -1  262.79   10.82
   6  -4  -1  263.56    8.89
  -6   4   1  262.76   10.52
  -6   4   1  260.78   11.26
   6   4  -1  269.25   12.05
   4  -4  -1  416.14   18.26
   4  -4  -1  428.71   24.00
  -4  -4   1  415.94   18.56
  -4  -4   1  424.09   12.83
   4  -4  -1  405.71   18.20
   4   4  -1  410.17   13.33
  -4   4   1  424.84   16.50
  -4   4   1  431.95   29.10
   4   4  -1  438.70   21.48
   0  -4   1   74.93    3.15
   0  -4   1   75.22    3.11
   0  -4  -1   77.11    3.78
   0  -4  -1   78.20    3.61
   0  -4  -1   75.74    3.39
   0   4  -1   76.70    2.47
   0   4  -1   77.61    2.82
   0   4   1   75.86    3.20
  -2  -4  -1  293.14   13.64
   2  -4   1  294.75   11.42
  -2  -4  -1  292.67   12.64
   2  -4   1  291.00   15.60
  -2  -4  -1  287.82   11.56
   2   4   1  291.24   13.56
   2   4   1  288.75   11.40
  -2   4  -1  290.52    8.60
   2   4   1  292.28   13.06
  -2   4  -1  282.71   10.83
   4  -4   1  894.31   39.77
  -4  -4  -1  884.73   29.31
  -4  -4  -1  870.53   40.93
  -4   4  -1  856.47   45.05
  -4   4  -1  890.92   35.29
   4   4   1  871.98   22.51
  -4   4  -1  908.53   31.76
   4   4   1  872.76   39.31
  -6  -4  -1    1.71    0.48
  -6  -4  -1    1.51    0.33
   6  -4   1    1.30    0.34
   6   4   1    1.24    0.57
  -6   4  -1    1.69    0.42
  -8  -4  -1    1.27    0.38
   8  -4   1    1.13    0.28
  -8   4  -1    1.30    0.45
  10  -4   1  256.70   10.62
 -10  -4  -1  242.95    9.74
 -10   4  -1  257.53   11.33
  10   4   1  265.97    9.62
 -12  -4  -1   31.56    2.09
  12  -4   1   31.92    1.82
 -12   4  -1   31.95    1.75
  12   4   1   30.73    2.19
 -14  -4  -1   11.65    1.14
  14  -4   1   10.26    1.26
  14   4   1   12.26    1.56
 -14   4  -1   12.41    1.24
 -16  -4  -1   24.22    2.85
  16  -4   1   22.00    2.55
 -16   4  -1   27.21    2.74
  16   4   1   26.41    1.58
 -15  -5   1    2.25    0.50
  15  -5  -1    1.79    0.65
 -15   5   1    1.48    0.53
  15   5  -1    1.45    0.79
 -13  -5   1    5.38    0.76
  13  -5  -1    4.02    0.85
  13   5  -1    4.92    1.04
 -13   5   1    4.96    0.61
  11  -5  -1   19.04   16.97
 -11  -5   1   11.28    1.02
  11   5  -1   11.42    0.84
 -11   5   1   18.95   10.96
   9  -5  -1   11.45    0.89
  -9  -5   1   11.42    0.71
   9  -5  -1   13.78    0.76
   9   5  -1   11.03    0.67
  -9   5   1   14.02    0.82
   7  -5  -1   13.17    0.66
  -7  -5   1   14.23    0.94
   7  -5  -1   14.14    0.84
  -7   5   1   14.06    0.62
   7   5  -1   15.00    0.77
  -7   5   1   13.19    0.74
   5  -5  -1   14.15    0.65
   5  -5  -1   12.52    0.61
  -5  -5   1   13.99    0.85
  -5  -5   1   12.96    0.57
   5  -5  -1   12.64    0.59
  -5   5   1   13.69    0.63
   5   5  -1   14.38    0.58
  -5   5   1   12.83    0.52
  -3  -5   1    6.62    0.35
   3  -5  -1    6.45    1.03
  -3  -5   1    7.62    0.36
   3  -5  -1    7.61    2.04
   3   5  -1    6.90    0.37
  -3   5   1    7.15    0.38
  -3   5   1    7.08    0.59
  -3   5   1    6.64    0.69
   3   5  -1    7.64    0.42
  -1  -5   1   76.25    2.81
  -1  -5   1   77.09    3.11
   1  -5  -1   75.50    2.74
   1  -5  -1   74.12    3.16
   1  -5  -1   71.47    2.83
   1  -5  -1   72.21    2.62
   1   5  -1   73.68    2.86
  -1   5   1   72.47    2.41
   1   5  -1   76.48    3.77
   1  -5   1    9.74    0.49
  -1  -5  -1    8.31    0.45
  -1  -5  -1    8.24    0.43
  -1  -5  -1    8.72    0.37
   1  -5   1    8.68    0.42
  -1   5  -1    8.57    0.38
   1   5   1    8.22    0.40
  -1   5  -1    9.21    0.42
   1   5   1    8.13    0.32
  -3  -5  -1    1.64    0.18
  -3  -5  -1    2.25    0.32
   3  -5   1    1.84    0.31
  -3  -5  -1    1.69    0.20
  -3   5  -1    1.63    0.20
   3   5   1    1.53    0.25
  -3   5  -1    1.43    0.26
   3   5   1    1.91    0.19
  -5  -5  -1    3.98    1.80
   5  -5   1    4.10    0.49
  -5  -5  -1    3.55    0.27
  -5   5  -1    4.12    0.44
   5   5   1    3.96    0.98
  -5   5  -1    3.87    0.35
  -7  -5  -1    4.68    0.50
   7  -5   1    5.27    0.47
  -7   5  -1    5.48    0.42
   7   5   1    3.97    0.59
  -9  -5  -1    3.57    0.37
   9  -5   1    3.04    0.48
   9   5   1    4.35    0.50
 -11  -5  -1    0.33    0.38
  11  -5   1    0.65    0.35
 -13  -5  -1    2.47    0.72
  13  -5   1    2.31    0.86
  13   5   1    1.81    0.79
 -13   5  -1    2.53    0.75
 -15  -5  -1    2.12    0.82
  15  -5   1    1.37    0.58
 -15   5  -1    1.58    0.74
  16  -6  -1   -0.19    0.50
 -16  -6   1   -0.84    0.52
 -16   6   1   -0.01    0.52
  16   6  -1    0.78    0.88
 -14  -6   1   -0.13    0.42
  14  -6  -1    1.32    0.56
  14   6  -1    1.17    0.51
 -14   6   1    0.32    0.77
 -12  -6   1   26.75    1.72
  12  -6  -1   28.30    1.48
  12   6  -1   25.77    1.51
 -12   6   1   27.58    1.55
  10  -6  -1    3.96    0.26
  10  -6  -1    4.34    0.53
 -10  -6   1    4.19    0.61
 -10   6   1    4.27    0.56
  10   6  -1    4.53    0.77
  -8  -6   1   34.26    1.72
   8  -6  -1   33.45    1.71
   8  -6  -1   34.30    2.07
  -8   6   1   34.69    1.40
   8   6  -1   35.93    1.29
  -6  -6   1  110.02    5.24
  -6  -6   1  109.08    4.25
   6  -6  -1  109.10    4.54
   6  -6  -1  111.72    4.21
  -6   6   1  109.63    5.92
  -6   6   1  111.21    4.87
   6   6  -1  108.82    4.53
   4  -6  -1   47.99    1.69
  -4  -6   1   50.58    1.86
  -4  -6   1   48.52    1.96
   4  -6  -1   50.44    2.05
  -4   6   1   49.70    1.93
   4   6  -1   45.76    2.19
  -4   6   1   49.80    2.31
   4   6  -1   45.58    2.06
  -4   6   1   50.62    2.09
   2  -6  -1  256.51   11.58
   2  -6  -1  262.95   10.20
  -2  -6   1  265.50    9.37
  -2  -6   1  270.30   13.45
   2  -6  -1  264.26   14.03
   2   6  -1  258.25   11.23
  -2   6   1  262.66   11.61
  -2   6   1  265.84   11.36
  -2   6   1  271.64   11.39
   2   6  -1  256.59   10.64
   0  -6   1   25.86    1.00
   0  -6  -1   25.75    1.09
   0  -6  -1   24.80    1.13
   0  -6   1   25.23    1.01
   0   6  -1   25.39    1.19
   0   6   1   26.16    0.82
   0   6   1   24.82    0.93
  -2  -6  -1  156.34    7.62
   2  -6   1  151.84    6.64
   2  -6   1  154.30    6.55
  -2  -6  -1  157.56    7.83
  -2  -6  -1  158.65    7.61
   2   6   1  160.81    7.39
  -2   6  -1  155.81    5.96
   2   6   1  158.42    6.30
  -2   6  -1  154.89    7.93
  -4  -6  -1  141.91    5.41
   4  -6   1  126.79    5.49
  -4  -6  -1  141.34    4.68
   4   6   1  135.18    4.67
   4   6   1  138.57   10.83
  -4   6  -1  131.19    5.27
  -4   6  -1  119.38    5.31
  -6  -6  -1    4.98    0.36
   6  -6   1    5.40    0.51
  -6  -6  -1    4.27    0.38
   6   6   1    5.39    0.43
  -6   6  -1    4.66    0.47
  -8  -6  -1   -0.04    0.26
   8  -6   1    0.21    0.27
  -8   6  -1    0.29    0.30
   8   6   1    0.71    0.44
  10  -6   1   30.81    2.03
 -10  -6  -1   35.30    1.61
 -10   6  -1   33.32    1.85
  10   6   1   35.03    2.27
  12  -6   1    6.55    1.09
 -12  -6  -1    5.89    0.86
  12   6   1    6.74    0.94
 -12   6  -1    5.45    0.70
 -14  -6  -1    4.98    0.57
  14  -6   1    3.51    1.07
  14   6   1    5.22    0.82
 -15  -7   1    3.26    0.69
  15  -7  -1    5.11    1.02
 -15   7   1    4.78    0.80
  15   7  -1    4.80    0.91
  13  -7  -1    7.77    0.84
 -13  -7   1    8.37    0.94
  13   7  -1    8.64    1.08
 -13   7   1    9.03    0.81
 -11  -7   1   16.14    1.13
  11  -7  -1   16.97    1.20
 -11   7   1   18.10    0.87
  11   7  -1   19.05    1.03
  -9  -7   1    4.69    0.64
   9  -7  -1    3.78    0.29
   9  -7  -1    4.57    0.46
  -9   7   1    4.65    0.45
   9   7  -1    3.81    0.44
   7  -7  -1   19.08    0.94
   7  -7  -1   17.99    0.96
  -7  -7   1   18.50    1.14
   7   7  -1   19.51    0.95
  -7   7   1   18.38    0.85
  -7   7   1   18.81    1.30
  -5  -7   1   95.11    3.70
  -5  -7   1   93.00    4.81
   5  -7  -1   95.46    4.23
   5  -7  -1   90.64    3.19
   5   7  -1   90.02    3.52
  -5   7   1   93.37    3.61
  -5   7   1   91.33    4.21
  -5   7   1   94.34    5.13
   3  -7  -1  144.81    5.40
  -3  -7   1  141.37    4.09
   3  -7  -1  147.09    5.92
  -3  -7   1  146.40    6.90
   3   7  -1  141.59    5.44
  -3   7   1  146.76    6.40
   3   7  -1  143.17    6.71
  -3   7   1  152.35    4.82
  -3   7   1  150.23    5.83
   1  -7  -1   59.01    2.82
  -1  -7   1   60.52    2.40
   1  -7  -1   58.23    2.41
  -1  -7   1   60.83    2.41
  -1   7   1   60.16    2.30
  -1   7   1   59.24    2.60
   1   7  -1   61.54    3.05
  -1   7   1   60.64    2.48
   1   7  -1   59.76    2.95
   1  -7   1   71.87    3.36
  -1  -7  -1   79.65    3.12
   1  -7   1   76.13    3.35
  -1  -7  -1   76.52    3.11
   1   7   1   78.98    2.96
   1   7   1   75.68    2.91
  -1   7  -1   70.55    2.55
  -1   7  -1   74.70    3.08
   3  -7   1    1.31    0.29
  -3  -7  -1    1.30    0.16
  -3  -7  -1    0.90    0.26
   3  -7   1    1.45    0.24
  -3  -7  -1    1.43    0.21
   3   7   1    1.45    0.16
   3   7   1    1.42    0.21
  -3   7  -1    1.58    0.22
  -3   7  -1    1.48    0.18
  -5  -7  -1    6.69    0.27
   5  -7   1    7.98    0.50
  -5  -7  -1    7.12    0.59
  -5  -7  -1    6.70    0.40
   5   7   1    7.40    0.51
  -5   7  -1    6.74    0.44
  -5   7  -1    6.80    0.47
  -7  -7  -1   47.96    1.79
   7  -7   1   45.63    1.86
  -7   7  -1   44.53    2.11
   7   7   1   47.17    1.99
   9  -7   1   32.98    1.70
  -9  -7  -1   34.69    1.78
  -9   7  -1   38.15    2.21
   9   7   1   36.52    1.22
 -11  -7  -1   12.92    0.93
  11  -7   1   17.03    1.25
  11   7   1   13.62    1.18
 -11   7  -1   15.16    1.06
 -13  -7  -1   12.86    1.00
  13  -7   1    9.81    0.96
  13   7   1   11.42    1.05
 -13   7  -1   10.80    1.12
  15  -7   1    7.95    2.75
 -15  -7  -1    5.60    0.98
  15   7   1    5.05    0.98
 -15   7  -1    4.21    0.77
  16  -8  -1   16.92    1.69
 -16  -8   1   17.51    1.63
  16   8  -1   13.57    1.74
 -16   8   1   15.30    1.54
  14  -8  -1    0.76    0.47
 -14  -8   1    0.54    0.54
 -14   8   1    0.92    0.52
  14   8  -1    0.24    0.45
  12  -8  -1   67.40    3.25
 -12  -8   1   67.02    3.02
  12   8  -1   63.43    2.95
 -12   8   1   69.11    2.81
 -10  -8   1   35.05    1.70
  10  -8  -1   38.59    1.49
  10  -8  -1   36.59    3.46
  10   8  -1   39.23    1.77
 -10   8   1   42.25    1.88
   8  -8  -1   45.10    2.29
   8  -8  -1   38.56    2.64
  -8  -8   1   40.18    1.62
  -8   8   1   41.67    1.60
   8   8  -1   39.45    1.96
  -6  -8   1  113.30    7.23
  -6  -8   1  123.32    5.74
   6  -8  -1  118.33    4.91
  -6   8   1  123.25    7.12
   6   8  -1  120.64    4.91
  -6   8   1  118.79    3.93
   4  -8  -1  232.88   10.25
  -4  -8   1  236.16    9.79
  -4  -8   1  236.20    8.92
   4  -8  -1  240.43    9.59
   4   8  -1  232.67   10.46
  -4   8   1  235.14    9.60
  -4   8   1  236.46    9.92
  -4   8   1  236.82    8.48
   2  -8  -1  452.54   21.63
   2  -8  -1  430.93   17.17
  -2  -8   1  435.27   18.05
  -2  -8   1  424.28   23.26
   2   8  -1  429.71   21.26
   2   8  -1  411.47   15.96
  -2   8   1  437.00   14.06
  -2   8   1  421.62   16.08
   0  -8   1   20.82    0.85
   0  -8  -1   19.97    0.80
   0  -8   1   20.34    0.89
   0  -8   1   21.30    0.87
   0  -8  -1   19.02    0.95
   0   8  -1   19.39    1.01
   0   8   1   20.39    0.90
   0   8   1   19.96    0.80
  -2  -8  -1  187.03    7.82
  -2  -8  -1  185.16    8.36
   2  -8   1  182.21    7.44
   2  -8   1  179.43    7.62
  -2  -8  -1  186.59    7.72
   2   8   1  184.15    5.19
  -2   8  -1  180.72    6.71
  -2   8  -1  184.72    6.23
   2   8   1  185.32    6.63
  -4  -8  -1  524.32   21.96
   4  -8   1  539.22   23.63
  -4  -8  -1  517.61   18.30
  -4  -8  -1  520.77   14.50
   4   8   1  523.45   20.83
  -4   8  -1  539.33   19.61
   4   8   1  525.51   17.65
  -4   8  -1  529.05   22.28
  -6  -8  -1   21.84    1.19
   6  -8   1   19.16    0.90
  -6   8  -1   20.19    0.75
   6   8   1   21.91    1.28
   8  -8   1    7.73    0.72
  -8  -8  -1   11.34    0.75
   8   8   1   10.10    0.74
  -8   8  -1    8.70    0.65
  10  -8   1  100.54    4.31
 -10  -8  -1   99.58    3.79
  10   8   1  100.40    3.77
 -10   8  -1  101.01    5.42
  12  -8   1   31.70    2.02
 -12  -8  -1   27.71    1.47
  12   8   1   25.15    1.63
 -12   8  -1   31.48    1.79
 -14  -8  -1   -0.15    0.41
  14  -8   1    0.04    0.47
  14   8   1    0.25    0.68
 -15  -9   1   26.52    2.53
  15  -9  -1   24.11    1.87
  15   9  -1   25.84    2.51
 -15   9   1   26.55    2.14
  13  -9  -1   79.14    4.98
 -13  -9   1   81.70    5.45
 -13   9   1   88.29    4.88
  13   9  -1   87.00    4.29
  11  -9  -1   18.49    1.07
 -11  -9   1   16.95    0.91
 -11   9   1   19.72    1.05
  11   9  -1   16.58    0.93
  -9  -9   1   37.33    1.60
   9  -9  -1   37.98    1.70
   9  -9  -1   36.76    2.29
  -9   9   1   39.22    1.50
   9   9  -1   39.97    1.41
  -7  -9   1  595.30   21.83
   7  -9  -1  586.25   22.47
  -7   9   1  571.69   21.45
   7   9  -1  595.39   20.71
  -5  -9   1   50.45    1.63
  -5  -9   1   47.80    2.26
   5  -9  -1   51.78    1.87
  -5   9   1   48.51    1.61
  -5   9   1   51.24    2.39
   5   9  -1   50.69    2.10
  -5   9   1   48.99    2.01
   3  -9  -1   79.24    3.01
   3  -9  -1   75.58    3.15
  -3  -9   1   80.24    2.65
  -3  -9   1   74.56    3.52
  -3   9   1   76.43    3.07
  -3   9   1   78.37    3.38
   3   9  -1   77.61    3.22
   3   9  -1   77.70    2.71
  -3   9   1   80.34    3.13
   1   9  -1  878.48   26.61
  -1  -9  -1  485.52   21.08
  -1  -9  -1  484.88   21.28
   1  -9   1  491.06   23.83
   1  -9   1  474.46   20.46
   1   9   1  486.67   14.66
  -1   9  -1  483.70   19.68
  -1   9  -1  462.63   18.22
   3  -9   1  151.02    5.79
   3  -9   1  148.12    6.35
  -3  -9  -1  151.05    7.05
  -3  -9  -1  152.50    5.84
  -3  -9  -1  154.22    5.96
   3   9   1  155.68    4.38
  -3   9  -1  152.77    5.77
   3   9   1  152.64    4.61
  -5  -9  -1  298.64   15.44
  -5  -9  -1  300.66   10.86
  -5  -9  -1  290.78    7.55
   5  -9   1  306.64   10.89
   5   9   1  300.78   10.61
  -5   9  -1  302.20   14.70
  -5   9  -1  302.07   14.68
   7  -9   1  247.94    9.64
  -7  -9  -1  240.27   11.35
  -7   9  -1  236.54    8.62
   7   9   1  233.00    6.78
  -9  -9  -1  132.07    5.02
   9  -9   1  133.56    5.23
   9   9   1  135.01    4.47
  -9   9  -1  132.79    5.25
  11  -9   1    4.40    0.66
 -11  -9  -1    3.28    0.58
  11   9   1    5.44    0.68
 -11   9  -1    4.32    0.64
  13  -9   1   23.08    2.23
 -13  -9  -1   21.59    1.62
 -13   9  -1   21.72    2.30
  13   9   1   23.31    1.89
  15  -9   1   54.45    4.64
 -15  -9  -1   58.76    4.96
 -15   9  -1   60.44    4.17
  15   9   1   55.08    5.32
 -16 -10   1    0.53    0.55
  16 -10  -1    1.12    0.72
 -16  10   1    0.68    0.51
 -14 -10   1    0.63    0.54
  14 -10  -1    0.47    0.48
  14  10  -1    1.10    0.66
  12 -10  -1   10.40    0.95
 -12 -10   1    7.08    0.75
  12  10  -1    8.33    0.95
 -12  10   1   10.73    1.13
 -10 -10   1    3.90    0.53
  10 -10  -1    3.88    0.47
  10  10  -1    3.01    0.66
 -10  10   1    4.03    0.47
  -8 -10   1   10.22    0.63
   8 -10  -1   14.17    0.73
   8  10  -1   12.52    0.75
  -8  10   1   12.51    0.67
  -6 -10   1   24.36    1.28
   6 -10  -1   23.94    0.96
  -6  10   1   24.65    0.98
   6  10  -1   24.84    0.84
  -6  10   1   22.73    1.19
   4 -10  -1  230.85    8.99
  -4 -10   1  223.84    9.19
  -4 -10   1  217.29    9.89
   4  10  -1  216.64    9.71
  -4  10   1  227.06    8.81
  -4  10   1  232.27    8.07
  -4  10   1  234.33    8.75
   2 -10  -1  146.99    5.54
   2 -10  -1  154.45    6.60
  -2 -10   1  146.12    6.31
  -2 -10   1  147.15    4.73
   2  10  -1  144.46    8.75
  -2  10   1  146.69    9.22
  -2  10   1  146.80    5.55
  -2  10   1  147.88    5.62
   2  10  -1  147.28    6.02
   0 -10   1   32.08    1.51
   0 -10   1   29.57    1.23
   0 -10   1   30.04    1.19
   0 -10  -1   30.87    1.04
   0 -10  -1   31.43    1.12
   0  10   1   31.66    1.24
   0  10  -1   30.15    0.91
   2 -10   1    4.90    0.43
  -2 -10  -1    4.56    0.35
   2 -10   1    5.20    0.34
  -2 -10  -1    4.83    0.30
   2  10   1    4.06    0.22
   2  10   1    4.08    0.25
  -2  10  -1    4.92    0.32
  -2  10  -1    4.54    0.35
   4 -10   1    5.81    0.44
  -4 -10  -1    5.36    0.41
  -4 -10  -1    5.82    0.51
  -4 -10  -1    5.24    0.36
   4 -10   1    5.92    0.63
  -4  10  -1    4.97    0.37
   4  10   1    4.64    0.44
   4  10   1    4.69    0.35
  -6 -10  -1   31.43    1.19
   6 -10   1   32.26    1.28
  -6 -10  -1   35.63    1.70
  -6  10  -1   33.87    1.43
   6  10   1   31.10    1.23
   8 -10   1   37.31    1.14
  -8 -10  -1   35.93    1.40
  -8  10  -1   35.14    1.68
   8  10   1   36.36    1.50
  10 -10   1   48.96    2.37
 -10 -10  -1   49.76    2.19
  10  10   1   43.39    1.74
 -10  10  -1   43.29    2.63
 -12 -10  -1   12.35    0.93
  12 -10   1   11.05    1.11
  12  10   1   14.05    1.16
 -12  10  -1   13.45    1.25
 -14 -10  -1    2.75    0.83
  14 -10   1    2.07    0.61
  14  10   1    2.99    0.66
 -14  10  -1    2.18    0.61
 -15 -11   1   -0.62    0.42
  15 -11  -1   -0.43    0.66
 -15  11   1    0.60    0.55
  15  11  -1    0.64    0.75
 -13 -11   1   -0.67    0.72
  13 -11  -1    0.37    0.43
 -13  11   1    0.39    0.56
  13  11  -1    0.66    0.48
  11 -11  -1    3.04    0.80
 -11 -11   1    3.76    0.64
 -11  11   1    3.63    0.44
  11  11  -1    4.08    0.63
   9 -11  -1    0.22    0.49
  -9 -11   1    0.38    0.28
   9  11  -1    0.24    0.35
  -9  11   1   -0.17    0.28
   7 -11  -1    0.68    0.37
  -7 -11   1   -0.23    0.53
  -7  11   1   -0.14    0.30
   7  11  -1    1.06    0.47
  -5 -11   1    0.80    0.28
  -5 -11   1    0.55    0.17
  -5  11   1    0.39    0.14
  -5  11   1    0.54    0.28
  -5  11   1    0.66    0.15
   5  11  -1    0.28    0.24
  -3 -11   1    2.19    0.28
   3 -11  -1    2.35    0.32
  -3 -11   1    1.89    0.28
   3 -11  -1    2.17    0.28
   3  11  -1    1.98    0.38
  -3  11   1    2.20    0.27
  -3  11   1    2.35    0.16
  -3  11   1    2.20    0.19
   1 -11  -1   11.60    0.48
   1 -11  -1   10.63    0.45
   1 -11  -1   10.92    0.59
  -1 -11   1   11.55    0.56
  -1 -11   1   10.74    0.50
   1  11  -1   11.02    0.47
   1  11  -1   12.29    0.61
  -1  11   1   11.37    0.34
   1 -11   1    8.40    0.49
   1 -11   1    8.57    0.65
  -1 -11  -1    7.76    0.44
  -1 -11  -1    8.40    0.38
  -1  11  -1    8.71    0.55
   1  11   1    8.78    0.43
   1  11   1    8.75    0.33
  -1  11  -1    8.42    0.44
   3 -11   1    3.98    0.28
   3 -11   1    3.15    0.38
  -3 -11  -1    3.22    0.27
  -3 -11  -1    4.41    0.32
   3  11   1    3.23    0.30
  -3  11  -1    4.09    0.31
   3  11   1    3.40    0.28
  -5 -11  -1    1.24    0.27
  -5 -11  -1    1.37    0.16
   5 -11   1    1.42    0.30
   5  11   1    1.23    0.32
  -5  11  -1    1.71    0.33
  -7 -11  -1    0.86    0.15
  -7 -11  -1    1.18    0.23
  -7  11  -1    1.76    0.50
  -9 -11  -1    1.70    0.46
  -9  11  -1    1.35    0.46
 -11 -11  -1    1.86    0.65
  11 -11   1    2.76    0.60
  11  11   1    2.86    0.56
  13 -11   1    1.37    0.52
 -13 -11  -1    1.23    0.79
  13  11   1    1.11    0.70
 -15 -11  -1    0.92    0.43
  15 -11   1    0.93    0.50
 -15  11  -1    1.40    0.58
  15  11   1    0.69    0.73
  16 -12  -1    0.18    0.58
 -16 -12   1   -0.20    0.39
 -16  12   1   -0.23    0.68
  16  12  -1    0.24    0.83
 -14 -12   1    2.25    0.69
  14 -12  -1    3.75    0.62
 -14  12   1    4.09    0.64
  14  12  -1    2.76    0.64
 -12 -12   1   25.79    1.51
  12 -12  -1   25.19    1.79
 -12  12   1   24.22    1.63
  12  12  -1   21.59    1.27
  10 -12  -1   24.30    2.51
 -10 -12   1   21.98    1.25
  10 -12  -1   20.05    1.96
 -10  12   1   22.45    1.91
  10  12  -1   21.24    1.37
   8 -12  -1    3.97    0.43
  -8 -12   1    3.91    0.56
   8  12  -1    3.48    0.59
  -8  12   1    3.49    0.52
  -6 -12   1   98.70    4.06
   6 -12  -1  102.82    3.23
  -6  12   1   98.05    5.13
  -6  12   1  100.93    4.42
   6  12  -1   97.22    3.33
   4 -12  -1   17.34    0.75
  -4 -12   1   17.49    0.86
   4 -12  -1   17.12    0.81
  -4 -12   1   17.82    0.81
   4  12  -1   17.16    0.83
  -4  12   1   17.95    0.72
  -4  12   1   17.05    0.70
  -4  12   1   15.59    0.69
  -2 -12   1  107.57    5.27
   2 -12  -1  107.97    3.89
  -2 -12   1  110.91    2.94
   2 -12  -1  110.21    4.81
  -2  12   1  112.51    3.75
   2  12  -1  112.32    5.19
  -2  12   1  108.91    3.59
   0 -12  -1   44.08    1.59
   0 -12  -1   44.33    1.92
   0 -12   1   40.27    1.56
   0 -12   1   44.33    1.82
   0 -12  -1   44.33    1.69
   0 -12   1   43.85    2.01
   0  12  -1   41.52    1.89
   0  12   1   43.46    1.44
  -2 -12  -1    0.56    0.16
   2 -12   1    0.61    0.30
   2 -12   1    1.04    0.38
  -2 -12  -1    0.64    0.15
  -2  12  -1    0.72    0.19
   4 -12   1   80.57    3.28
  -4 -12  -1   77.68    2.60
   4 -12   1   75.33    3.88
  -4 -12  -1   77.42    2.69
  -4  12  -1   75.58    4.59
   4  12   1   77.39    2.60
  -6 -12  -1    0.63    0.16
   6 -12   1    0.43    0.39
  -6  12  -1    1.11    0.34
   6  12   1    0.29    0.20
  -8 -12  -1   46.79    2.49
   8 -12   1   51.61    2.27
  -8  12  -1   48.88    2.01
   8  12   1   50.21    1.80
 -10 -12  -1   23.54    1.42
  10 -12   1   27.94    1.59
 -10  12  -1   23.79    1.28
  10  12   1   24.37    1.58
 -12 -12  -1    1.04    0.52
  12 -12   1   -0.04    0.38
 -12  12  -1   -0.42    0.36
  12  12   1    0.24    0.60
 -14 -12  -1   11.40    1.18
  14 -12   1   12.38    1.15
 -14  12  -1   10.62    1.26
  14  12   1   10.58    1.18
 -15 -13   1   10.87    1.31
  15 -13  -1   11.94    0.70
 -15  13   1   12.11    1.42
  15  13  -1    9.07    1.33
 -13 -13   1   91.49    5.62
  13 -13  -1   83.02    5.45
 -13  13   1   88.19    3.93
  13  13  -1   89.53    5.07
  11 -13  -1    0.07    0.46
 -11 -13   1    0.34    0.41
 -11  13   1    0.26    0.47
  -9 -13   1   11.22    0.84
   9 -13  -1   11.60    0.81
  -9  13   1   10.87    0.67
   9  13  -1   10.64    0.84
  -7 -13   1  444.23   16.62
   7 -13  -1  428.17   13.20
   7  13  -1  441.26   13.98
  -7  13   1  423.13   14.79
   5 -13  -1   46.10    2.41
  -5 -13   1   45.24    2.30
  -5  13   1   45.34    3.21
  -5  13   1   43.20    1.83
   5  13  -1   44.43    2.34
  -5  13   1   46.20    2.03
   3 -13  -1    0.30    0.21
   3 -13  -1    0.80    0.24
  -3 -13   1    0.48    0.20
  -3  13   1    0.58    0.11
  -3  13   1    0.80    0.38
   1 -13  -1  443.51   18.34
   1 -13  -1  428.58   17.16
   1 -13  -1  447.03   19.04
  -1 -13   1  439.21   14.41
  -1 -13   1  447.98   17.59
  -1  13   1  435.68   15.51
  -1 -13  -1  105.15    2.91
  -1 -13  -1   99.63    3.85
   1 -13   1  103.68    4.67
   1 -13   1  101.10    4.00
  -1  13  -1  101.56    4.67
   1  13   1  104.49    3.82
   1  13   1  100.97    3.91
   3 -13   1   88.19    3.44
  -3 -13  -1   86.48    3.97
   3 -13   1   89.99    3.40
  -3 -13  -1   87.99    3.43
  -3  13  -1   89.52    3.63
   3  13   1   86.90    3.49
   3  13   1   88.13    3.33
  -5 -13  -1  258.04   14.89
  -5 -13  -1  268.80   37.09
   5 -13   1  270.99    9.45
  -5 -13  -1  264.10    9.22
   5  13   1  262.76    9.65
  -5  13  -1  254.02    8.14
  -7 -13  -1  125.79    4.05
  -7 -13  -1  118.81    6.08
   7 -13   1  126.36    4.58
   7  13   1  130.77    3.93
  -7  13  -1  132.57    5.47
   9 -13   1   78.20    2.35
  -9 -13  -1   71.29    2.95
   9  13   1   73.35    2.82
  -9  13  -1   75.02    3.35
  11 -13   1   32.46    2.26
 -11 -13  -1   27.87    1.54
  11  13   1   25.97    1.45
 -11  13  -1   26.08    1.12
 -13 -13  -1   21.19    1.87
  13 -13   1   23.20    1.63
  13  13   1   18.27    1.99
 -13  13  -1   23.04    1.75
  15 -13   1   40.10    3.63
 -15 -13  -1   36.07    3.72
 -15  13  -1   41.00    3.96
  15  13   1   36.79    3.91
  14 -14  -1    4.32    0.77
 -14 -14   1    5.09    0.73
  14  14  -1    4.46    0.85
 -14  14   1    6.39    0.84
 -12 -14   1   63.42    2.76
  12 -14  -1   68.67    3.93
 -12  14   1   65.60    3.77
  12  14  -1   67.82    3.63
 -10 -14   1   76.44    3.60
 -10 -14   1   69.73    4.50
  10 -14  -1   79.29    3.45
  10  14  -1   73.08    2.79
 -10  14   1   75.89    3.28
   8 -14  -1   43.11    1.83
  -8 -14   1   42.82    1.39
   8  14  -1   44.28    1.51
  -8  14   1   42.40    1.86
  -6 -14   1   69.28    2.80
   6 -14  -1   69.35    2.14
   6  14  -1   67.42    2.36
  -6  14   1   67.59    4.70
  -6  14   1   65.76    2.22
  -4 -14   1  234.14    7.53
   4 -14  -1  238.27    8.64
  -4 -14   1  228.69   13.06
   4 -14  -1  235.47    8.25
  -4  14   1  226.15   12.28
  -4  14   1  229.98   11.21
  -4  14   1  236.41    9.55
   4  14  -1  228.17    8.60
   2 -14  -1  214.43    6.82
   2 -14  -1  216.76    8.32
  -2 -14   1  205.50    9.22
  -2 -14   1  214.58    6.42
   2  14  -1  216.90    9.47
  -2  14   1  212.09    6.90
  -2  14   1  209.20   12.68
   0 -14   1    0.42    0.16
   0 -14  -1    0.18    0.18
   0 -14   1    0.29    0.31
   0 -14  -1    0.29    0.14
   0 -14   1    0.53    0.30
   0  14   1    0.20    0.14
   2 -14   1  151.10    5.81
  -2 -14  -1  150.33    6.76
   2 -14   1  149.25    5.69
  -2 -14  -1  149.90    5.17
  -2  14  -1  152.73   11.30
   2  14   1  149.32    6.08
   2  14   1  155.95    4.79
   4 -14   1  293.87   10.95
  -4 -14  -1  304.86   10.96
   4 -14   1  297.39   11.99
  -4 -14  -1  303.84   12.08
   4  14   1  299.04    9.95
  -6 -14  -1   25.20    1.39
   6 -14   1   25.15    0.94
  -6 -14  -1   26.20    0.98
  -6  14  -1   27.03    1.33
   6  14   1   26.78    0.90
  -8 -14  -1   20.41    1.43
  -8 -14  -1   18.26    1.08
   8 -14   1   21.05    1.02
  -8  14  -1   18.36    1.13
   8  14   1   17.69    1.01
  10 -14   1  118.97    5.56
 -10 -14  -1  114.95    5.55
  10  14   1  123.22    4.72
 -10  14  -1  116.57    4.32
 -12 -14  -1   43.70    2.03
  12 -14   1   39.35    2.29
 -12  14  -1   38.62    2.88
  12  14   1   40.47    2.41
  14 -14   1    0.60    0.74
 -14 -14  -1    0.98    0.58
  14  14   1    1.14    0.53
 -14  14  -1    0.79    0.67
 -15 -15   1    8.64    1.16
  15 -15  -1   11.98    1.22
 -15  15   1   11.99    1.11
  15  15  -1    7.93    1.32
 -13 -15   1    3.26    0.75
  13 -15  -1    2.08    0.48
 -13  15   1    1.91    0.46
 -11 -15   1   20.86    1.22
  11 -15  -1   18.65    1.14
  11  15  -1   17.47    1.14
 -11  15   1   14.64    1.06
   9 -15  -1   13.82   11.20
  -9 -15   1    8.51    0.64
  -9  15   1    9.88    0.85
   9  15  -1    9.87    0.79
  -7 -15   1    2.56    0.38
  -7  15   1    2.88    0.48
   7  15  -1    1.78    0.35
   5 -15  -1   51.32    1.81
  -5 -15   1   49.73    2.39
   5  15  -1   50.84    1.83
  -5  15   1   48.95    3.33
  -5  15   1   50.57    1.49
   3 -15  -1   12.05    0.42
  -3 -15   1   14.16    0.83
  -3 -15   1   13.21    0.71
   3 -15  -1   13.53    0.60
  -3  15   1   12.75    0.54
  -3  15   1   13.31    0.57
   3  15  -1   14.33    0.75
  -3  15   1   12.60    0.54
   1 -15  -1   31.30    1.52
  -1 -15   1   28.06    0.90
   1 -15  -1   30.73    1.14
   1 -15  -1   30.68    1.12
  -1 -15   1   29.01    1.08
  -1 -15   1   29.93    1.12
  -1  15   1   28.73    1.07
   1 -15   1   44.31    1.97
   1 -15   1   42.15    1.95
  -1 -15  -1   43.58    1.21
  -1 -15  -1   43.27    1.55
   1  15   1   44.31    1.56
   1  15   1   42.44    1.31
   3 -15   1   28.45    1.19
  -3 -15  -1   30.46    1.20
   3 -15   1   31.37    1.23
  -3 -15  -1   27.86    1.35
   3  15   1   27.64    0.95
  -3  15  -1   26.53    1.56
   3  15   1   28.80    1.67
   5 -15   1    6.60    0.44
  -5 -15  -1    7.00    0.47
   5 -15   1    6.99    0.55
   5  15   1    7.98    0.44
  -5  15  -1    5.54    0.60
   7 -15   1   26.86    1.22
  -7 -15  -1   32.74    2.66
  -7  15  -1   25.87    1.33
   9 -15   1   13.37    0.94
  -9 -15  -1   12.98    0.82
   9  15   1   14.08    0.78
  -9  15  -1   12.51    0.93
 -11 -15  -1    6.23    0.59
  11 -15   1    4.59    0.70
  11  15   1    5.32    0.77
 -11  15  -1    5.90    0.83
 -13 -15  -1   11.86    1.05
  13 -15   1   12.72    1.10
 -13  15  -1   11.79    1.03
  13  15   1   11.13    1.02
 -15 -15  -1    1.96    0.78
  15 -15   1    0.77    0.79
 -15  15  -1    1.42    0.77
 -14 -16   1   -0.04    0.64
  14 -16  -1   -0.06    0.50
  14  16  -1    0.84    0.72
 -14  16   1    0.75    0.39
 -12 -16   1   28.54    2.13
  12 -16  -1   29.70    1.95
 -12  16   1   31.99    2.35
  12  16  -1   31.67    2.52
 -10 -16   1    6.92    0.78
  10 -16  -1    5.51    0.50
 -10  16   1    5.99    0.59
  10  16  -1    7.88    0.65
  -8 -16   1   66.81    2.55
   8 -16  -1   64.05    2.64
  -8  16   1   68.64    3.03
   8  16  -1   69.12    2.43
  -6 -16   1   55.80    2.45
   6 -16  -1   60.00    2.16
  -6  16   1   58.48    2.17
   6  16  -1   58.68    2.05
   4 -16  -1   66.58    2.65
   4 -16  -1   66.10    2.46
  -4 -16   1   63.30   10.43
   4  16  -1   66.24    8.81
  -4  16   1   63.93    1.90
  -4  16   1   65.64    2.24
  -4  16   1   66.49    3.79
  -2 -16   1   29.44    1.19
   2 -16  -1   29.12    1.11
   2 -16  -1   28.76    0.86
  -2 -16   1   27.23    1.12
   2 -16  -1   29.08    0.92
   2  16  -1   29.89    1.29
  -2  16   1   27.33    0.84
   0 -16   1   11.91    0.67
   0 -16  -1   12.74    0.47
   0 -16  -1   13.31    0.50
   0 -16  -1   14.37    0.62
   0 -16   1   12.48    0.68
   0 -16   1   12.09    0.83
   0  16   1   12.86    0.56
   2 -16   1    0.75    0.42
  -2 -16  -1    0.80    0.17
   2 -16   1    0.37    0.26
  -2  16  -1    0.54    0.17
   2  16   1    0.98    0.16
   4 -16   1  173.06    7.23
   4 -16   1  169.81    6.11
  -4 -16  -1  164.53   11.39
  -4 -16  -1  163.05    4.35
   4  16   1  160.57    4.57
  -6 -16  -1    0.98    1.42
   6 -16   1    0.75    0.33
  -6 -16  -1    0.74    0.26
   6  16   1    0.61    0.41
  -6  16  -1    0.58    0.41
  -8 -16  -1    5.58    0.57
   8 -16   1    5.57    0.79
  -8 -16  -1    7.53    0.52
   8  16   1    7.35    0.69
  -8  16  -1    7.71    0.71
  10 -16   1   27.83    1.63
 -10 -16  -1   29.19    2.02
  10  16   1   27.40    1.34
 -10  16  -1   28.07    1.48
  12 -16   1    7.76    3.06
 -12 -16  -1    2.00    0.52
  12  16   1    3.21    0.67
 -14 -16  -1    3.46    0.64
  14 -16   1    4.75    0.73
 -14  16  -1    4.10    0.61
  14  16   1    2.92    0.56
 -15 -17   1    0.59    0.51
 -15  17   1    0.33    0.44
  15  17  -1   -0.51    0.56
  13 -17  -1    7.25    0.83
 -13 -17   1    8.46    1.11
 -13  17   1    7.92    0.75
  13  17  -1    5.63    0.89
 -11 -17   1   12.03    0.73
  11 -17  -1   13.36    0.88
  11  17  -1   14.35    1.02
 -11  17   1   11.02    1.04
   9 -17  -1    1.36    0.60
  -9 -17   1    2.38    0.52
  -9  17   1    2.41    0.48
   9  17  -1    1.51    0.52
   7 -17  -1   34.24    1.40
  -7 -17   1   35.63    1.90
  -7  17   1   37.13    1.29
   7  17  -1   33.69    1.32
   5 -17  -1    0.55    0.22
   5 -17  -1    0.20    0.29
  -5 -17   1    1.12    0.43
   5  17  -1    0.07    0.38
  -5  17   1    0.65    0.32
  -5  17   1    0.76    0.19
   3  17  -1    0.98    0.37
  -3  17   1    0.98    0.21
  -3  17   1    0.91    0.17
   1 -17  -1   14.34    0.62
  -1 -17   1   14.73    0.86
  -1 -17   1   14.23    0.56
  -1 -17   1   15.52    0.77
   1 -17  -1   14.55    0.71
   1 -17  -1   13.58    0.65
  -1  17   1   13.88    0.51
   1 -17   1    1.64    0.29
   1 -17   1    1.22    0.30
   1 -17   1    1.67    0.21
  -1 -17  -1    1.92    0.20
  -1 -17  -1    1.76    0.27
   1  17   1    1.91    0.21
   1  17   1    1.83    0.29
   3 -17   1   24.51    1.27
  -3 -17  -1   24.80    1.02
   3 -17   1   23.16    1.40
  -3 -17  -1   22.79    1.05
   3  17   1   24.22    0.88
   5 -17   1   10.55    0.78
  -5 -17  -1   10.46    0.52
   5 -17   1   11.02    0.71
   5  17   1   11.33    0.53
   7 -17   1    6.71    0.67
  -7 -17  -1    5.59    0.49
  -7 -17  -1    6.64    0.54
  -7  17  -1    6.08    0.73
   7  17   1    6.49    0.50
  -9 -17  -1    8.30    0.81
   9 -17   1    7.73    0.71
  -9  17  -1    8.15    0.90
   9  17   1    7.18    1.24
  11 -17   1    0.09    0.37
 -11 -17  -1   -0.33    0.42
 -11  17  -1   -0.19    0.54
 -13 -17  -1    0.89    0.61
  13 -17   1    0.06    0.49
 -13  17  -1    1.54    0.80
  13  17   1    1.52    0.65
 -14 -18   1    4.87    0.68
  14  18  -1    5.10    0.88
 -14  18   1    5.89    0.71
 -12 -18   1   57.60    3.29
  12 -18  -1   60.60    3.47
  12  18  -1   58.37    3.29
 -12  18   1   57.10    3.10
 -10 -18   1   38.89    2.07
  10 -18  -1   35.25    1.74
 -10  18   1   42.49    1.72
  10  18  -1   35.44    1.76
   8 -18  -1   55.39    2.13
  -8 -18   1   51.57    2.60
  -8  18   1   52.91    2.36
   8  18  -1   49.40    1.74
  -6 -18   1  140.29   16.79
   6 -18  -1  131.66    5.21
   6  18  -1  145.10   20.67
  -6  18   1  130.74    3.87
   4 -18  -1  142.44    4.84
   4 -18  -1  143.54    4.19
  -4 -18   1  138.43    5.15
  -4  18   1  136.94    7.72
   4  18  -1  146.46    4.05
  -4  18   1  144.54    5.19
   2 -18  -1  405.36   11.49
  -2 -18   1  393.12   13.97
   2 -18  -1  394.99   12.70
   2 -18  -1  407.11   15.49
  -2  18   1  392.37   27.18
   2  18  -1  399.21   12.98
   0 -18   1   68.69    3.49
   0 -18  -1   68.33    2.10
   0 -18  -1   66.70    2.63
   0 -18  -1   71.45    2.89
   0 -18   1   68.54    3.18
   0  18   1   68.20    3.65
  -2 -18  -1   88.90    2.69
   2 -18   1   95.19    3.60
  -2 -18  -1   94.15    3.50
   2 -18   1   88.59    3.27
   2  18   1   92.47    3.78
   2  18   1   90.35    2.90
  -4 -18  -1  466.86   14.62
   4 -18   1  465.28   17.04
   4 -18   1  446.20   17.18
   4  18   1  477.20   13.38
  -6 -18  -1    0.21    0.20
   6 -18   1    0.54    0.33
  -6  18  -1    0.46    0.31
   8 -18   1    0.79    0.43
  -8  18  -1    0.09    0.30
 -10 -18  -1  142.16    6.00
  10 -18   1  142.83    8.79
 -10  18  -1  136.12    7.24
  10  18   1  134.57    5.28
  12 -18   1    6.54    0.97
  12  18   1    4.72    0.61
 -12  18  -1    5.29    0.50
  14 -18   1    1.72    0.78
 -14  18  -1    2.20    0.67
  14  18   1    2.41    0.90
 -13 -19   1    6.39    0.84
  13 -19  -1    8.65    1.02
 -13  19   1    7.35    0.95
  13  19  -1    8.03    1.17
 -11 -19   1    1.96    0.61
  11 -19  -1    2.00    0.60
  11  19  -1    1.16    0.56
 -11  19   1    0.96    0.42
   9 -19  -1   53.20    2.25
  -9 -19   1   51.21    2.35
   9  19  -1   49.96    1.68
  -9  19   1   56.22    2.32
  -7 -19   1   27.64    1.38
   7 -19  -1   32.99    1.67
   7  19  -1   36.97    1.33
  -7  19   1   30.25    1.29
   5 -19  -1   74.20    2.45
   5 -19  -1   68.90    2.21
  -5 -19   1   69.78    2.02
  -5  19   1   71.16    2.37
   5  19  -1   72.13    2.51
  -3 -19   1   52.37    2.19
   3 -19  -1   52.08    1.37
   3 -19  -1   53.39    1.62
   3  19  -1   55.14    1.64
  -3  19   1   48.80    3.21
  -3  19   1   53.78    3.06
   1 -19  -1  105.29    3.05
   1 -19  -1  102.02    2.99
   1 -19  -1  103.58    3.14
  -1 -19   1   99.47    3.48
  -1 -19   1  106.05    2.63
  -1  19   1   99.66    7.00
  -1 -19  -1  255.42   10.82
   1 -19   1  252.24    8.32
   1 -19   1  251.46    7.35
  -1 -19  -1  265.37    7.97
   1  19   1  248.80   12.79
   3 -19   1    1.52    0.32
  -3 -19  -1    1.32    0.33
   3 -19   1    1.40    0.29
   3  19   1    0.97    0.19
   5 -19   1   14.42    1.02
   5 -19   1   14.64    0.97
  -5 -19  -1   13.50    0.75
   5  19   1   15.17    0.76
  -7 -19  -1   88.70    5.32
   7 -19   1   93.08    2.66
  -7 -19  -1   90.16    3.42
   7  19   1   96.70    3.53
  -7  19  -1   91.91    3.49
   9 -19   1   13.22    0.79
  -9 -19  -1   13.18    0.96
   9  19   1   13.79    0.94
  -9  19  -1   14.62    0.79
 -11 -19  -1    1.04    0.60
  11 -19   1    1.56    0.66
  11  19   1    0.99    0.46
 -11  19  -1    0.85    0.44
 -13 -19  -1   15.62    1.62
  13 -19   1   15.56    1.18
 -13  19  -1   15.90    1.34
  13  19   1   15.79    1.91
 -14 -20   1    1.33    0.75
  14 -20  -1   -0.03    0.42
  14  20  -1    0.54    0.41
 -14  20   1    0.77    0.47
 -12 -20   1    0.51    0.46
  12 -20  -1   -0.32    0.60
 -12  20   1    0.05    0.36
  12  20  -1    0.72    0.60
 -10 -20   1   11.69    1.08
  10 -20  -1   11.49    0.96
 -10  20   1   14.30    0.94
  10  20  -1   10.89    0.71
  -8 -20   1    0.55    0.40
   8 -20  -1   -0.18    0.25
  -8  20   1    0.44    0.28
   8  20  -1   -0.42    0.31
   6 -20  -1    0.67    0.37
  -6 -20   1    0.52    0.34
  -6  20   1    0.76    0.35
   6  20  -1    0.09    0.36
   4 -20  -1   68.51    2.58
  -4 -20   1   74.16    2.55
   4 -20  -1   75.24    2.53
   4  20  -1   74.94    2.71
  -4  20   1   70.63    4.88
  -4  20   1   74.50    2.34
   2 -20  -1    0.65    0.25
  -2 -20   1    0.47    0.25
   2 -20  -1    0.71    0.29
  -2  20   1    0.90    0.22
   0 -20  -1   20.90    0.99
   0 -20  -1   21.92    0.81
   0 -20   1   22.38    1.16
   0 -20   1   20.92    1.06
   0 -20  -1   23.57    0.81
   0  20   1   20.67    1.03
   2 -20   1   65.58    1.99
  -2 -20  -1   58.15    2.89
  -2 -20  -1   58.88    1.68
   2 -20   1   60.30    2.61
   2  20   1   58.84    2.12
   4 -20   1    9.25    0.65
  -4 -20  -1    8.23    0.48
   4 -20   1   10.91    0.72
   4  20   1    9.00    0.49
   6 -20   1   25.20    1.25
  -6 -20  -1   24.40    1.21
   6 -20   1   24.02    0.93
   6  20   1   25.61    1.04
  -6  20  -1   24.40    1.20
  -8 -20  -1   10.01    0.84
   8 -20   1   11.39    1.18
  -8 -20  -1   11.01    1.04
   8  20   1   11.95    0.65
  -8  20  -1   10.56    0.85
 -10 -20  -1    1.44    0.56
  10 -20   1    0.57    0.42
 -10  20  -1    0.76    0.52
  10  20   1    0.85    0.70
  12 -20   1    5.08    0.70
 -12 -20  -1    4.52    0.65
 -12  20  -1    6.79    1.00
  12  20   1    4.78    0.71
  14 -20   1    2.99    0.88
  14  20   1    1.96    0.49
 -14  20  -1    2.06    0.51
 -13 -21   1   38.43    2.49
  13 -21  -1   39.11    3.66
  13  21  -1   34.93    3.32
 -13  21   1   36.40    2.70
 -11 -21   1    9.08    1.14
  11 -21  -1    8.23    1.14
 -11  21   1    7.60    0.80
  11  21  -1    7.38    0.89
   9 -21  -1   26.98    1.35
  -9 -21   1   26.37    1.86
   9  21  -1   24.55    1.31
  -9  21   1   28.57    1.51
  -7 -21   1  174.26    6.60
   7 -21  -1  173.11    5.74
   7  21  -1  176.20    6.84
  -7  21   1  172.54    6.72
   5 -21  -1    5.58    0.66
  -5 -21   1    5.52    0.49
   5 -21  -1    6.10    0.64
   5  21  -1    5.10    0.49
  -5  21   1    5.62    0.49
   3 -21  -1    1.46    0.17
   3 -21  -1    1.50    0.24
   3 -21  -1    1.62    0.29
   1 -21  -1  393.48   14.08
   1 -21  -1  388.86   12.67
   1 -21  -1  401.64   13.45
  -1 -21   1  397.41   16.34
  -1 -21   1  388.70   12.06
  -1 -21  -1   60.97    1.95
  -1 -21  -1   63.33    1.97
  -1 -21  -1   57.99    2.51
   1 -21   1   60.45    2.82
   1 -21   1   59.65    2.26
   3 -21   1  123.02    3.74
   3 -21   1  126.02    4.28
  -3 -21  -1  129.86    3.50
   3  21   1  132.60    3.22
   5 -21   1  189.91    6.60
   5 -21   1  185.12    7.79
  -5 -21  -1  186.02    7.97
   5  21   1  184.60    6.02
  -7 -21  -1   37.82    1.28
   7 -21   1   40.49    1.50
  -7  21  -1   40.51    1.56
   7  21   1   36.86    1.75
  -9 -21  -1   98.17    4.16
   9 -21   1  101.71    4.50
   9  21   1  100.47    4.56
  -9  21  -1  103.51    4.69
  11 -21   1    4.82    0.63
 -11 -21  -1    5.90    0.69
 -11  21  -1    6.78    0.84
  11  21   1    4.94    0.49
  13 -21   1    6.54    1.04
 -13 -21  -1    5.94    0.91
 -13  21  -1    6.90    0.98
  13  21   1    5.19    0.71
  14 -22  -1    5.11    0.65
 -14 -22   1    7.86    0.93
 -14  22   1    8.12    1.02
  14  22  -1    6.33    1.00
 -12 -22   1    1.33    0.54
  12  22  -1    0.79    0.56
 -12  22   1    1.16    0.56
  10 -22  -1    1.41    0.54
  10  22  -1    1.59    0.44
 -10  22   1    1.75    0.50
  -8 -22   1    5.99    0.59
   8 -22  -1    5.96    0.52
   8  22  -1    5.35    0.76
  -8  22   1    5.38    0.44
   6 -22  -1    6.00    0.43
  -6 -22   1    5.33    0.58
   6 -22  -1    7.05    0.50
  -6  22   1    6.35    0.46
   6  22  -1    6.47    0.63
  -4 -22   1   44.30    1.66
   4 -22  -1   44.08    1.86
   4 -22  -1   43.48    1.41
   4  22  -1   48.16    1.84
  -4  22   1   45.05    1.80
  -2 -22   1    2.25    0.31
  -2 -22   1    1.92    0.47
   2 -22  -1    2.77    0.34
   2 -22  -1    2.57    0.30
   2 -22  -1    1.92    0.31
   0 -22  -1    0.14    0.25
   0 -22   1   -0.05    0.31
   0 -22   1    0.16    0.37
   0 -22  -1   -0.02    0.24
   0 -22  -1    0.33    0.21
   2 -22   1   16.67    0.73
   2 -22   1   14.19    0.78
  -2 -22  -1   15.86    0.73
   2  22   1   15.37    0.81
  -4 -22  -1   23.19    0.96
   4 -22   1   23.73    1.14
   4 -22   1   23.09    1.13
   4  22   1   27.64    0.94
   6 -22   1    8.45    0.59
  -6 -22  -1    8.53    0.68
   6 -22   1    7.74    0.66
   6  22   1    8.57    0.65
  -6  22  -1    8.77    0.47
  -8 -22  -1    2.02    1.15
   8 -22   1    0.65    0.44
   8  22   1    1.32    0.51
  -8  22  -1    1.33    0.39
 -10 -22  -1    0.04    0.43
  10 -22   1   -0.05    0.56
 -10  22  -1   -0.40    0.43
 -12 -22  -1    9.77    0.99
  12 -22   1    9.44    1.28
 -12  22  -1   10.62    1.16
  12  22   1   10.49    0.95
  13 -23  -1   39.67    3.07
 -13 -23   1   40.63    3.06
  13  23  -1   44.82    3.82
 -13  23   1   39.47    4.17
 -11 -23   1    0.55    0.38
  11 -23  -1    0.45    0.30
  11  23  -1    0.57    0.50
   9 -23  -1    9.80    0.71
  -9 -23   1    9.75    0.83
   9  23  -1    7.95    0.82
  -9  23   1    8.60    0.77
  -7 -23   1  132.09    4.91
   7 -23  -1  120.23    4.92
   7  23  -1  125.74    4.98
  -7  23   1  120.66    7.27
   5 -23  -1    9.86    0.75
  -5 -23   1    9.61    0.51
  -5  23   1    9.14    0.49
   5  23  -1    9.41    0.73
   3 -23  -1    1.69    0.35
   3 -23  -1    1.91    0.25
  -3 -23   1    1.20    0.38
   3  23  -1    1.20    0.29
   1 -23  -1  166.37    4.54
  -1 -23   1  163.89    5.29
   1 -23  -1  164.66   10.99
   1 -23  -1  172.43    5.33
  -1 -23   1  160.84    5.25
   1 -23   1    6.94    0.54
  -1 -23  -1    6.42    0.50
   1 -23   1    7.67    0.49
  -1 -23  -1    6.76    0.43
   3 -23   1   80.09    2.28
   3 -23   1   80.35    2.01
  -3 -23  -1   74.21    2.38
   3  23   1   75.93    3.19
  -5 -23  -1  120.80    3.58
   5 -23   1  120.38    4.22
   5 -23   1  125.29    5.29
   5  23   1  129.16    4.96
   7 -23   1   40.07    1.67
  -7 -23  -1   37.00    1.42
  -7  23  -1   39.94    1.46
   7  23   1   40.14    2.02
  -9 -23  -1   27.23    1.50
   9 -23   1   28.48    1.69
  -9  23  -1   28.39    2.01
   9  23   1   27.88    1.85
  11 -23   1   14.07    1.41
 -11 -23  -1   15.50    1.64
 -11  23  -1   15.19    1.49
  11  23   1   14.94    1.28
 -13 -23  -1    8.57    1.33
  13 -23   1    8.79    1.25
 -13  23  -1    8.98    1.15
  13  23   1   11.03    1.54
  12 -24  -1    2.04    0.66
 -12  24   1    1.57    0.55
  12  24  -1    2.03    0.62
  10 -24  -1   34.13    2.02
 -10 -24   1   33.12    2.04
  10  24  -1   32.34    1.52
 -10  24   1   30.82    1.66
  -8 -24   1   -0.03    0.59
   8 -24  -1    0.79    0.41
   8  24  -1    0.45    0.66
  -8  24   1    0.36    0.32
   6 -24  -1    6.76    0.60
  -6 -24   1    5.44    0.52
   6 -24  -1    5.90    0.45
  -6  24   1    5.75    0.59
   6  24  -1    6.07    0.65
   4 -24  -1   77.10    2.62
   4 -24  -1   75.53    1.74
  -4 -24   1   73.54    2.53
  -4  24   1   78.76    3.04
   4  24  -1   71.64    2.27
  -2 -24   1    4.51    0.50
   2 -24  -1    3.59    0.37
  -2 -24   1    4.03    0.51
   2 -24  -1    3.34    0.48
   0 -24  -1   15.65    0.69
   0 -24   1   18.47    0.87
   0 -24   1   16.44    0.84
   0 -24  -1   17.32    0.86
   2 -24   1   28.06    1.30
   2 -24   1   28.58    1.52
  -2 -24  -1   29.59    1.14
   4 -24   1    1.04    0.37
  -4 -24  -1    1.44    0.36
   6 -24   1   11.32    0.83
   6 -24   1   13.65    0.64
  -6 -24  -1   13.48    0.96
  -6  24  -1   13.03    0.85
   6  24   1   11.95    0.84
   8 -24   1   33.99    1.63
  -8 -24  -1   34.63    2.10
   8  24   1   33.85    1.90
  -8  24  -1   32.24    1.75
 -10 -24  -1    4.99    3.50
 -12 -24  -1    6.93    0.85
  12 -24   1    7.44    1.15
 -12  24  -1    7.07    0.68
  12  24   1    9.96    5.49
 -13 -25   1    6.35    0.92
  13 -25  -1    7.12    0.81
  13  25  -1    7.92    1.05
 -13  25   1    5.64    0.71
  11 -25  -1    3.50    0.68
 -11 -25   1    3.03    0.65
 -11  25   1    3.40    0.57
  11  25  -1    2.70    0.66
   9 -25  -1    1.88    0.50
   9  25  -1    0.55    0.51
  -9  25   1    1.04    0.33
  -7 -25   1   39.23    9.70
   7 -25  -1   29.46    1.56
  -7  25   1   27.80    1.64
   7  25  -1   28.70    9.55
   5 -25  -1   29.14    1.35
   5 -25  -1   32.05    1.10
  -5 -25   1   29.42    1.60
   5  25  -1   30.35    1.37
  -5  25   1   29.44    1.60
   3 -25  -1    0.28    0.20
   3 -25  -1    0.86    0.35
  -3 -25   1    0.07    0.34
   1 -25  -1   28.47    1.29
  -1 -25   1   30.93    1.34
  -1 -25   1   29.73    1.13
   1 -25  -1   27.61    1.26
  -1 -25  -1   45.65    1.52
   1 -25   1   42.34    1.44
  -1 -25  -1   43.98    1.70
   1 -25   1   45.12    1.52
   3 -25   1    3.95    0.51
  -3 -25  -1    4.84    0.37
   3 -25   1    3.59    0.61
   5 -25   1   12.44    1.14
   5 -25   1   12.55    0.82
  -5 -25  -1   13.28    0.73
   5  25   1   11.39    0.79
   7 -25   1   16.64    0.91
  -7 -25  -1   14.48    1.11
  -7  25  -1   15.57    0.99
   7  25   1   12.89    1.12
  -9 -25  -1    3.20    0.74
  -9  25  -1    2.93    1.61
   9  25   1    1.92    0.43
  11 -25   1    3.15    0.58
  11  25   1    4.08    0.73
 -12 -26   1   77.51    5.94
  12 -26  -1   70.35    5.92
 -12  26   1   74.03    8.41
  12  26  -1   75.66    7.18
 -10 -26   1   22.60    1.76
  10 -26  -1   22.29    1.84
 -10  26   1   24.23    1.79
  10  26  -1   23.52    1.40
  -8 -26   1   57.44    2.52
   8 -26  -1   55.49    3.58
   8  26  -1   54.40    2.60
  -8  26   1   53.87    3.40
   6 -26  -1  107.37    4.30
  -6 -26   1  109.47    4.81
   6 -26  -1  106.98    5.10
  -6  26   1  110.31    4.79
   6  26  -1  108.77    5.03
   4 -26  -1  121.17    4.19
  -4 -26   1  128.74    4.38
   4 -26  -1  117.48    3.92
   4  26  -1  120.53    4.92
  -4  26   1  126.96    5.09
  -2 -26   1  168.56    4.54
  -2 -26   1  169.92    4.69
   2 -26  -1  167.47    5.32
   2 -26  -1  163.86    6.54
   0 -26  -1   12.93    0.61
   0 -26  -1   14.52    0.75
   0 -26   1   14.24    0.87
   0 -26   1   14.06    0.80
   2 -26   1   45.94    1.50
   2 -26   1   45.96    1.92
  -2 -26  -1   46.93    1.82
  -2 -26  -1   48.63    2.03
   4 -26   1  291.94    7.40
   4 -26   1  290.92   10.69
  -4 -26  -1  287.76    9.36
   4  26   1  300.10   11.54
   6 -26   1    5.11    0.53
  -6 -26  -1    5.22    0.60
   6 -26   1    4.56    0.53
  -6  26  -1    5.38    0.61
   6  26   1    5.86    0.57
  -8 -26  -1    1.97    0.43
  -8  26  -1    1.12    0.57
   8  26   1    1.95    0.46
  10 -26   1  105.56    5.46
 -10 -26  -1  105.52    6.78
  10  26   1  100.30    7.36
 -10  26  -1  106.58    9.31
 -12 -26  -1   11.00    1.39
  12 -26   1    9.23    1.31
 -12  26  -1   13.95    1.11
  12  26   1   14.11    1.60
 -11 -27   1    1.25    0.51
  11 -27  -1    0.31    0.39
 -11  27   1   -0.23    0.38
  11  27  -1    0.44    0.40
   9 -27  -1   21.14    1.86
  -9 -27   1   25.54    1.73
  -9  27   1   23.15    1.73
   9  27  -1   22.93    2.10
   7 -27  -1    0.10    0.29
  -7 -27   1    0.27    0.33
  -7  27   1    0.21    0.34
   5 -27  -1    8.45    0.61
   5 -27  -1    9.14    0.70
  -5 -27   1   10.79    0.79
  -5  27   1    9.78    0.54
   5  27  -1    8.62    0.57
   3 -27  -1   42.00    1.56
  -3 -27   1   40.80    1.61
   3 -27  -1   38.22    1.63
  -3 -27   1   43.91    1.59
  -1 -27   1   10.98    0.56
   1 -27  -1   10.60    0.54
  -1 -27   1    9.85    0.78
   1 -27  -1   10.06    0.55
   1 -27   1   17.92    0.88
  -1 -27  -1   19.74    1.22
   1 -27   1   18.68    0.84
  -1 -27  -1   18.19    0.85
   3 -27   1    4.30    0.59
   3 -27   1    4.56    0.54
  -3 -27  -1    4.00    0.38
   5 -27   1    0.59    0.48
  -5 -27  -1    1.58    0.43
   5 -27   1    0.80    0.52
   5  27   1    1.11    0.27
   7 -27   1   34.21    5.41
  -7 -27  -1   28.03    1.79
  -7  27  -1   27.75    1.55
   7  27   1   31.08    1.37
  -9 -27  -1    0.29    0.35
   9 -27   1    0.01    0.49
  -9  27  -1    0.57    0.58
   9  27   1    0.52    0.36
  11 -27   1    5.53    1.11
 -11 -27  -1    4.84    0.62
  11  27   1    4.81    0.78
 -11  27  -1    5.71    0.69
  12 -28  -1    4.43    0.94
 -12 -28   1    4.73    0.56
  12  28  -1    4.89    1.01
 -12  28   1    5.46    0.69
 -10 -28   1    1.99    0.73
  10  28  -1    1.64    0.50
 -10  28   1    1.42    0.54
  -8 -28   1   10.67    0.95
   8 -28  -1   11.91    0.80
  -8  28   1   11.38    0.90
   8  28  -1   11.15    2.91
   6 -28  -1   15.67    0.81
   6 -28  -1   14.51    0.83
  -6 -28   1   15.71    0.95
  -6  28   1   14.29    1.08
   6  28  -1   14.71    0.87
   4 -28  -1    3.59    0.39
  -4 -28   1    4.74    0.49
   4 -28  -1    3.70    0.47
  -4  28   1    3.94    0.41
   2 -28  -1   41.39    1.91
  -2 -28   1   43.47    1.76
   2 -28  -1   44.60    2.04
  -2 -28   1   46.23    1.74
   0 -28  -1    0.29    0.27
   0 -28   1    0.58    0.30
   2 -28   1   41.58    1.52
   2 -28   1   35.21    1.96
  -2 -28  -1   38.26    1.30
  -2 -28  -1   42.27    1.84
   4 -28   1    7.67    0.66
   4 -28   1    5.49    0.52
  -4 -28  -1    7.88    0.61
   4  28   1    6.68    0.62
   6 -28   1    1.32    0.48
   6 -28   1    2.19    0.48
  -6  28  -1    2.01    0.42
   6  28   1    1.38    0.37
   8 -28   1    0.86    0.46
  -8  28  -1    0.57    0.62
 -10 -28  -1   13.19    1.40
  10 -28   1   11.84    1.12
  10  28   1   12.65    1.38
 -10  28  -1   11.03    1.19
 -11 -29   1   13.59    1.10
  11 -29  -1   13.60    1.38
 -11  29   1   12.79    1.04
  11  29  -1   12.67    1.18
  -9 -29   1    3.89    0.51
   9 -29  -1    4.74    0.62
   9  29  -1    4.42    0.75
  -7 -29   1   15.60    0.85
   7 -29  -1   15.14    1.05
   7  29  -1   17.88    0.88
  -7  29   1   17.75    1.19
   5 -29  -1   15.55    1.06
  -5 -29   1   13.94    1.02
   5 -29  -1   12.94    0.77
   5  29  -1   13.34    1.47
  -5  29   1   13.11    0.80
  -3 -29   1    2.60    0.69
  -3 -29   1    1.78    0.40
   3 -29  -1    2.22    0.49
   3 -29  -1    3.24    0.66
  -1 -29   1   11.07    0.74
   1 -29  -1   10.61    0.81
  -1 -29   1   12.20    0.92
   1 -29  -1   10.48    0.65
  -1 -29  -1   16.13    0.98
  -1 -29  -1   15.78    0.91
   1 -29   1   14.76    1.02
   1 -29   1   17.21    0.85
   3 -29   1   15.01    0.87
   3 -29   1   16.56    1.02
  -3 -29  -1   15.95    1.09
  -3 -29  -1   17.04    0.96
   5 -29   1    8.19    0.66
   5 -29   1    8.86    0.85
  -5 -29  -1   10.28    0.67
   5  29   1    8.68    0.65
  -7 -29  -1   12.20    0.98
   7 -29   1    9.12    1.10
  -7  29  -1    8.96    0.84
   7  29   1   11.04    0.74
  -9 -29  -1   12.02    1.16
   9 -29   1   10.53    0.95
  -9  29  -1   10.94    1.09
   9  29   1   11.36    1.01
  11 -29   1    1.37    0.62
 -11  29  -1    1.27    0.62
  11  29   1    1.18    0.43
  10 -30  -1   12.42    1.02
  10  30  -1   10.42    1.26
 -10  30   1   10.76    0.78
   8 -30  -1   18.42    1.31
  -8 -30   1   18.90    1.70
   8  30  -1   18.55    1.21
  -8  30   1   17.33    1.58
   6 -30  -1   12.00    0.73
   6 -30  -1   11.44    0.81
  -6  30   1   11.02    1.18
   6  30  -1   11.93    1.07
   4 -30  -1   21.99    1.25
  -4 -30   1   21.99    1.33
  -4 -30   1   20.75    1.22
   4 -30  -1   20.98    1.06
  -4  30   1   19.44    1.67
   2 -30  -1   61.15    2.58
   2 -30  -1   61.51    3.73
  -2 -30   1   58.85    2.37
  -2 -30   1   59.29    2.85
   0 -30   1    6.88    0.57
   0 -30   1    7.07    0.78
   0 -30  -1    7.14    0.62
   0 -30  -1    8.40    0.75
  -2 -30  -1    4.78    0.37
   2 -30   1    5.46    0.57
   2 -30   1    4.80    0.61
  -4 -30  -1   90.15    4.33
   4 -30   1   91.45    3.30
   4 -30   1   89.06    5.16
  -6 -30  -1    0.11    0.30
   6  30   1    0.43    0.42
  -6  30  -1    0.31    0.37
   8 -30   1    4.82    0.59
  -8 -30  -1    5.24    0.69
  -8  30  -1    4.49    0.60
   8  30   1    5.75    0.74
  10 -30   1   21.98    2.55
 -10 -30  -1   22.99    2.29
  10  30   1   25.14    2.37
 -10  30  -1   28.14    2.84
  11 -31  -1    3.15    0.70
 -11 -31   1    2.83    0.61
  11  31  -1    4.00    0.76
 -11  31   1    4.22    0.52
  -9 -31   1   16.17    1.24
   9 -31  -1   16.93    1.53
   9  31  -1   14.85    1.31
  -9  31   1   14.93    1.49
  -7 -31   1  140.78    7.68
   7 -31  -1  147.04    8.76
  -7  31   1  148.20    7.85
   7  31  -1  143.94    5.95
   5 -31  -1   13.26    0.88
  -5 -31   1   10.93    0.89
   5 -31  -1   12.55    0.83
  -5  31   1   13.91    0.92
  -3 -31   1    1.44    0.45
  -3 -31   1    2.10    0.34
   3 -31  -1    1.76    0.38
  -1 -31   1  197.26    6.22
   1 -31  -1  201.25    8.14
  -1 -31   1  205.11    8.41
   1 -31  -1  209.19   13.11
  -1 -31  -1   92.13    5.00
   1 -31   1   90.70    4.01
  -1 -31  -1   93.91    3.50
   1 -31   1   88.35    3.52
   3 -31   1   12.56    1.10
  -3 -31  -1   12.55    0.84
  -3 -31  -1   12.78    0.88
   3 -31   1   12.37    0.91
  -5 -31  -1   59.27    3.71
   5 -31   1   56.52    3.31
   5 -31   1   59.86    3.04
   5  31   1   57.92    3.27
  -7 -31  -1   59.17    3.84
   7 -31   1   57.20    3.08
   7 -31   1   65.01    3.27
   7  31   1   57.11    3.46
  -7  31  -1   64.95    4.34
   9 -31   1   42.92    3.70
  -9 -31  -1   44.15    3.69
   9  31   1   39.33    3.46
  -9  31  -1   45.99    4.13
 -10 -32   1    1.94    0.41
  10 -32  -1    2.29    0.64
  10  32  -1    2.03    0.52
 -10  32   1    2.98    0.58
   8 -32  -1    4.10    0.49
  -8  32   1    4.80    0.61
   8  32  -1    3.52    0.64
   6 -32  -1    4.95    0.43
  -6 -32   1    3.58    0.55
   6 -32  -1    3.91    0.62
   6  32  -1    3.60    0.79
  -6  32   1    4.94    0.51
  -4 -32   1   46.27    1.83
   4 -32  -1   45.23    1.74
  -4 -32   1   45.42    2.39
   4 -32  -1   43.42    2.84
  -4  32   1   44.89    3.30
   2 -32  -1    5.99    0.52
  -2 -32   1    5.71    0.66
   2 -32  -1    5.98    0.45
  -2 -32   1    6.42    0.67
   0 -32   1   12.71    1.00
   0 -32  -1   12.07    1.06
   0 -32   1   11.92    1.12
   0 -32  -1   11.76    1.00
   2 -32   1   28.07    1.35
  -2 -32  -1   25.92    1.88
  -2 -32  -1   26.62    1.73
   2 -32   1   27.41    1.22
  -4 -32  -1    0.82    0.24
  -4 -32  -1    0.99    0.44
   6 -32   1   15.01    1.32
  -6 -32  -1   15.49    1.18
   6 -32   1   14.72    1.15
   6  32   1   14.61    1.20
  -6  32  -1   16.51    1.24
  -8 -32  -1    7.92    0.84
   8 -32   1    6.01    0.89
   8  32   1    6.67    0.69
  -8  32  -1    8.89    0.98
 -10 -32  -1    5.78    0.73
  10 -32   1    5.42    0.95
  10  32   1    8.02    1.12
   9 -33  -1    1.57    0.37
  -9 -33   1    0.81    0.41
   9  33  -1    1.64    0.66
  -9  33   1    1.41    0.44
   7 -33  -1    0.49    0.51
  -7 -33   1    0.64    0.54
  -7  33   1    0.84    0.48
   7  33  -1    1.24    0.40
  -5 -33   1    0.15    0.35
  -5 -33   1    0.15    0.41
   5 -33  -1    0.85    0.41
   5 -33  -1    0.13    0.42
  -5  33   1   -0.24    0.24
   3 -33  -1   -0.03    0.32
  -3 -33   1    0.49    0.34
  -3 -33   1    0.19    0.33
   3 -33  -1    0.72    0.99
   1 -33  -1    0.40    0.39
  -1 -33   1    0.34    0.26
  -1 -33   1   -0.07    0.44
   1 -33   1    0.65    0.39
  -1 -33  -1    0.64    0.35
  -1 -33  -1    0.67    0.41
   1 -33   1    0.49    0.43
   3 -33   1    4.62    0.55
  -3 -33  -1    4.19    0.58
  -3 -33  -1    3.97    0.56
   3 -33   1    3.40    0.54
   5 -33   1    2.69    0.45
  -5 -33  -1    2.96    0.56
   5 -33   1    2.51    0.42
   7 -33   1    0.98    0.60
   7 -33   1   -0.58    0.52
  -7  33  -1   -0.53    0.42
  -9 -33  -1   -0.13    0.35
   9 -33   1   -0.12    0.49
  -9  33  -1   -0.20    0.39
  -8 -34   1    0.09    0.55
   8 -34  -1    0.50    0.33
   8  34  -1    0.14    0.56
  -6 -34   1   18.17    1.46
   6 -34  -1   16.75    1.31
   6 -34  -1   19.63    1.25
  -6  34   1   19.32    1.87
   4 -34  -1    0.72    0.28
  -4 -34   1   -0.35    0.59
  -4 -34   1    0.50    0.35
  -4  34   1    0.45    0.33
   2 -34  -1   16.83    1.10
   2 -34  -1   16.49    1.12
  -2 -34   1   19.82    1.59
  -2 -34   1   18.19    1.22
   0 -34  -1    6.66    0.63
   0 -34   1    5.00    0.68
   0 -34   1    5.76    0.69
   0 -34  -1    4.95    0.55
   2 -34   1    0.01    0.49
  -2 -34  -1   -0.11    0.23
  -2 -34  -1    0.40    0.39
   2 -34   1   -0.48    0.36
  -4 -34  -1   19.55    1.65
   4 -34   1   25.17    1.52
  -4 -34  -1   19.79    1.61
   4 -34   1   22.74    1.47
  -6 -34  -1    1.17    0.47
   6 -34   1   -0.28    0.40
   6 -34   1    0.34    0.59
  -8 -34  -1    8.42    1.00
   8 -34   1    9.15    0.98
   8  34   1    7.73    0.90
  -8  34  -1    6.77    0.96
  -9 -35   1    0.82    0.53
   9  35  -1    0.11    0.43
  -7 -35   1   65.42    3.43
   7 -35  -1   57.24    4.81
  -5 -35   1    0.96    0.54
   5 -35  -1    0.78    0.34
   5 -35  -1    0.79    0.38
  -5 -35   1    0.75    0.42
  -5  35   1    1.06    0.37
  -3 -35   1    4.15    0.69
  -3 -35   1    4.86    0.60
   3 -35  -1    3.45    0.58
   3 -35  -1    3.41    0.53
  -3  35   1    3.75    0.48
   1 -35  -1   77.99    4.11
   1 -35  -1   76.00    5.43
  -1 -35   1   75.54    4.78
  -1 -35   1   73.98    4.75
   1 -35   1    8.37    0.93
  -1 -35  -1    9.07    1.12
  -1 -35  -1    9.30    0.84
   1 -35   1   10.45    0.76
   3 -35   1    7.91    0.87
   3 -35   1    6.48    0.83
  -3 -35  -1    6.74    0.72
  -3 -35  -1    7.79    0.86
  -5 -35  -1   37.89    2.21
   5 -35   1   36.41    1.80
  -5 -35  -1   38.98    2.80
   5 -35   1   36.98    2.78
   7 -35   1    8.47    0.83
   7 -35   1    8.54    1.22
  -7 -35  -1    9.62    1.14
   7  35   1    8.22    0.98
  -7  35  -1    8.95    1.27
  -8 -36   1    0.17    0.46
   8  36  -1    1.67    0.46
  -6 -36   1   17.55    1.42
   6 -36  -1   14.14    1.08
  -6 -36   1   14.69    1.72
   6 -36  -1   14.51    0.97
  -4 -36   1   49.53    3.09
   4 -36  -1   46.77    3.39
  -4 -36   1   44.08    3.47
   4 -36  -1   46.92    2.79
  -4  36   1   51.44    5.15
   2 -36  -1   47.16    4.46
  -2 -36   1   43.58    2.10
  -2 -36   1   43.48    3.56
   2 -36  -1   46.23    2.65
   0 -36   1    0.20    0.41
   0 -36  -1    0.48    0.69
   0 -36   1    0.86    0.39
   0 -36  -1   -0.01    0.43
   2 -36   1   48.48    2.97
   2 -36   1   40.56    3.35
  -2 -36  -1   43.47    3.87
  -2 -36  -1   47.21    4.03
  -4 -36  -1   43.53    3.28
   4 -36   1   45.02    3.09
   4 -36   1   45.26    3.18
  -4 -36  -1   50.75    4.11
   6 -36   1   13.35    1.20
  -6 -36  -1   11.16    1.26
   6 -36   1   12.71    1.42
  -6  36  -1   12.91    1.25
  -7 -37   1    0.56    0.45
  -7 -37   1    1.28    0.49
  -5 -37   1    5.12    0.77
  -5 -37   1    5.01    0.81
   5 -37  -1    6.66    0.68
  -3 -37   1    8.22    0.75
   3 -37  -1    7.47    0.84
  -3 -37   1    9.45    0.89
   1 -37  -1    0.51    0.36
   1 -37  -1    0.79    0.42
  -1 -37   1    0.84    0.43
  -1 -37   1    1.00    0.38
   1 -37   1   16.93    1.38
  -1 -37  -1   18.75    1.69
  -1 -37  -1   18.60    1.62
   1 -37   1   18.75    1.63
  -3 -37  -1    5.00    0.67
   3 -37   1    4.44    0.57
   3 -37   1    5.66    0.81
  -3 -37  -1    3.69    0.67
   5 -37   1    2.42    0.46
  -5 -37  -1    3.26    0.61
   5 -37   1    3.96    0.70
  -5  37  -1    3.39    0.52
   7 -37   1   12.46    1.50
   7 -37   1   11.58    1.06
  -7  37  -1   10.85    1.43
   6 -38  -1   20.41    2.25
  -6 -38   1   21.78    2.14
  -6 -38   1   22.93    1.69
  -4 -38   1    1.49    0.50
   2 -38  -1   15.89    1.76
   2 -38  -1   16.00    1.37
  -2 -38   1   16.29    1.13
  -2 -38   1   16.03    1.71
   0 -38  -1    5.74    0.64
   0 -38   1    4.79    0.72
   0 -38  -1    4.92    0.56
   0 -38   1    4.43    0.72
  -2 -38  -1    0.16    0.35
   2 -38   1    0.12    0.49
  -2 -38  -1    0.31    0.43
   4 -38   1   30.80    2.04
  -4 -38  -1   29.33    2.72
  -4 -38  -1   32.60    2.91
   4 -38   1   32.23    1.89
  -6 -38  -1   -0.16    0.26
   6 -38   1   -0.30    0.37
  -6 -38  -1    0.16    0.33
   6 -38   1   -0.55    0.42
  -6  38  -1   -0.25    0.45
   5 -39  -1   -0.56    0.49
  -5 -39   1    0.36    0.38
  -5 -39   1   -0.15    0.40
   3 -39  -1    5.06    0.94
  -3 -39   1    7.66    0.74
  -3 -39   1    6.25    0.95
   1 -39  -1    7.40    0.77
  -1 -39   1    5.73    0.89
  -1 -39   1    6.81    0.79
   1 -39   1    1.59    0.49
  -1 -39  -1    2.36    0.58
   1 -39   1    1.23    0.38
   3 -39   1    9.86    0.75
  -3 -39  -1   10.75    0.95
   3 -39   1   11.74    1.19
   5 -39   1    2.72    0.54
  -5 -39  -1    2.53    0.44
  -5  39  -1    2.26    0.66
   4 -40  -1    3.91    0.71
  -4 -40   1    4.53    0.75
  -4 -40   1    4.30    0.66
  -2 -40   1   40.26    2.05
   2 -40  -1   34.30    3.56
  -2 -40   1   35.58    3.38
   0 -40   1    8.95    1.08
   0 -40   1   10.03    1.04
   0 -40  -1    7.49    0.84
   2 -40   1    0.74    0.50
   2 -40   1    0.73    0.35
  -2 -40  -1    1.64    0.52
  -1 -41   1    3.81    0.63
  -1 -41   1    3.31    0.54
   1 -41  -1    4.86    0.68
  -1 -41  -1   24.69    1.77
   1 -41   1   23.00    2.14
   1 -41   1   25.70    2.64
  16   0  -2    9.20    1.19
 -16   0   2    9.33    0.94
 -14   0   2  134.01    7.45
  14   0  -2  138.24    8.46
  12   0  -2    4.95    6.04
 -10   0   2    7.02    0.59
  10   0  -2    7.48    0.74
   8   0  -2  564.16   18.87
  -8   0   2  558.50   16.35
  -6   0   2  151.56    6.26
   6   0  -2  169.95    8.44
  -6   0   2  157.35    4.92
  -6   0   2  152.49    6.19
   4   0  -2   65.00    2.96
  -4   0   2   66.22    3.66
  -4   0   2   62.29    2.38
   4   0  -2   61.82    1.73
  -4   0   2   59.58    2.78
   2   0   2  297.09   12.83
  -2   0  -2  308.91   11.14
  -2   0  -2  311.84   12.77
  -4   0  -2  438.30   18.20
  -4   0  -2  406.54   23.68
   4   0   2  429.73   13.46
  -6   0  -2   15.76    0.84
   6   0   2   17.88    1.00
   8   0   2  628.69   20.57
   8   0   2  578.05   31.56
  -8   0  -2  611.75   28.52
  10   0   2    2.94    0.55
 -10   0  -2    3.53    0.65
  10   0   2    3.84    0.32
 -12   0  -2   16.59    0.99
  12   0   2   17.32    1.22
 -14   0  -2   79.09    5.23
  14   0   2   95.39    8.17
  15  -1  -2   -0.23    0.42
 -15  -1   2    0.91    0.53
 -15   1   2    0.90    0.49
  15   1  -2   -0.94    0.61
 -13  -1   2   -0.06    0.52
  13  -1  -2    1.05    0.46
 -13   1   2    0.54    0.37
  13   1  -2    0.35    0.72
 -11  -1   2   26.45    1.15
  11  -1  -2   26.01    1.48
  11   1  -2   25.68    1.14
 -11   1   2   25.15    1.42
   9   1  -2    3.08    0.53
  -9   1   2    3.48    0.45
  -7  -1   2    1.03    0.21
  -7  -1   2    1.24    0.21
  -7  -1   2    0.83    0.33
   7   1  -2    1.25    0.26
  -7   1   2    1.42    0.26
  -7   1   2    1.32    0.23
   5  -1  -2   72.53    4.15
   5  -1  -2   77.36    3.01
  -5  -1   2   75.55    3.01
  -5  -1   2   74.49    3.15
  -5  -1   2   74.12    2.51
  -5   1   2   79.63    2.38
   5   1  -2   73.69    3.63
  -5   1   2   74.26    3.13
  -5   1   2   77.72    2.47
   5   1  -2   77.25    3.15
  -3  -1   2   86.09    3.69
   3  -1  -2   87.52    3.62
   3  -1  -2   84.00    3.11
  -3  -1   2   89.93    2.99
  -3   1   2   88.75    3.51
  -3   1   2   87.83    3.66
   3   1  -2   82.26    3.31
  -3   1   2   83.99    3.34
   3   1  -2   85.41    3.52
  -1  -1   2  121.79    5.61
   1  -1  -2  126.03    4.92
  -1  -1   2  126.48    4.97
  -1  -1   2  127.34    4.48
  -1   1   2  126.14    4.55
   1   1  -2  124.86    5.34
  -1   1   2  122.34    5.36
  -1   1   2  123.66    5.39
   1  -1   2  320.74   11.05
  -1  -1  -2  306.49   12.93
  -1  -1  -2  315.96   11.77
   1   1   2  305.97   14.16
  -1   1  -2  309.91   15.54
  -1   1  -2  311.39   10.78
  -3  -1  -2   31.46    1.51
   3  -1   2   33.72    1.17
  -3  -1  -2   34.14    1.37
  -3   1  -2   33.93    0.88
  -3   1  -2   31.32    1.28
  -3   1  -2   32.40    1.08
   3   1   2   35.75    1.38
  -5  -1  -2   92.66    3.88
   5  -1   2   97.31    3.52
  -5  -1  -2   94.42    4.30
   5   1   2   94.99    3.58
  -5   1  -2   90.76    4.33
  -5   1  -2   96.63    4.00
  -7  -1  -2    0.28    0.38
   7  -1   2   -0.26    0.43
  -7   1  -2    0.03    0.37
   7   1   2    0.16    0.17
   7   1   2    0.17    0.36
   9  -1   2    5.83    0.74
   9  -1   2    6.58    0.39
  -9   1  -2    5.23    0.72
   9   1   2    5.89    0.83
   9   1   2    5.84    0.43
 -11  -1  -2   26.66    1.37
  11  -1   2   24.80    1.66
 -11   1  -2   23.88    1.44
  11   1   2   24.04    1.24
  13  -1   2   -0.46    0.49
 -13   1  -2    0.36    0.47
 -15  -1  -2   -0.43    0.45
 -15   1  -2    0.97    0.73
 -16  -2   2   -0.16    0.47
  16  -2  -2    0.32    0.65
 -16   2   2    0.58    0.44
  16   2  -2    0.65    0.60
  14  -2  -2    7.63    0.81
 -14  -2   2    7.68    0.94
  14   2  -2    5.88    0.96
 -14   2   2    5.67    0.93
 -12  -2   2    9.12    0.72
  12  -2  -2    7.73    0.78
 -12   2   2    8.86    0.82
  12   2  -2    8.27    0.85
  10  -2  -2    8.26    0.67
 -10  -2   2    5.93    0.54
  10   2  -2    7.54    0.65
 -10   2   2    7.38    0.56
  -8  -2   2    4.41    0.51
  -8  -2   2    5.18    0.29
   8   2  -2    5.27    0.51
  -8   2   2    5.93    0.76
   6  -2  -2   10.56    0.52
  -6  -2   2    9.17    0.38
  -6  -2   2    9.59    0.58
  -6  -2   2    9.41    0.56
  -6   2   2   10.06    0.56
   6   2  -2    9.74    0.56
  -6   2   2    9.22    0.56
  -6   2   2   10.18    0.60
   4  -2  -2    3.24    0.23
   4  -2  -2    2.29    0.28
  -4  -2   2    2.89    0.25
  -4  -2   2    2.66    0.34
  -4   2   2    2.86    0.20
   4   2  -2    2.41    0.21
  -4   2   2    2.94    0.33
  -4   2   2    2.87    0.27
  -2  -2   2   30.04    1.25
   2  -2  -2   32.14    1.66
   2  -2  -2   33.42    1.43
  -2  -2   2   28.49    0.99
   2   2  -2   30.60    1.39
   2   2  -2   33.29    1.24
  -2   2   2   33.65    1.13
  -2   2   2   31.76    1.30
  -2   2   2   31.22    1.38
   0  -2   2  154.00    6.22
   0  -2  -2  144.91    5.96
   0  -2   2  156.70    6.24
   0  -2  -2  149.83    6.61
   0   2   2  150.12    7.21
   0   2   2  150.94    6.33
   0   2  -2  156.10    6.23
   0   2  -2  158.84    6.63
  -2  -2  -2   24.70    1.14
   2  -2   2   24.89    1.03
  -2  -2  -2   26.16    1.05
   2   2   2   27.06    1.23
  -2   2  -2   23.73    0.98
  -2   2  -2   25.30    1.00
  -4  -2  -2   67.48    3.24
   4  -2   2   66.79    2.69
  -4  -2  -2   68.48    2.81
  -4   2  -2   67.35    2.93
   4   2   2   67.96    3.38
  -4   2  -2   62.84    3.49
   4   2   2   65.61    2.37
  -6  -2  -2   59.83    2.75
   6  -2   2   60.69    1.73
   6   2   2   60.70    2.22
  -6   2  -2   59.54    3.06
   6   2   2   58.74    2.07
   8  -2   2   11.63    0.89
  -8  -2  -2   10.23    0.81
  -8   2  -2   10.20    1.27
   8   2   2   10.01    0.62
  10  -2   2    3.24    0.34
 -10  -2  -2    2.75    0.50
  10  -2   2    3.11    0.48
 -10   2  -2    4.10    0.64
  10   2   2    2.80    0.42
 -12  -2  -2    1.00    0.64
  12  -2   2    0.31    0.54
  12   2   2    0.28    0.39
  14  -2   2    4.53    0.95
 -14  -2  -2    6.50    1.24
  14   2   2    4.37    0.78
  15  -3  -2    9.55    1.05
 -15  -3   2    8.49    0.72
 -15   3   2    6.19    0.80
  15   3  -2    6.03    1.15
  13  -3  -2   39.28    3.07
 -13  -3   2   45.08    2.06
  13   3  -2   38.91    2.76
 -13   3   2   41.80    2.66
 -11  -3   2    0.06    0.30
  11  -3  -2    0.22    0.50
 -11   3   2    0.45    0.31
  11   3  -2    0.04    0.49
  -9  -3   2   27.31    1.25
   9  -3  -2   27.88    0.95
  -9   3   2   32.28    1.44
   9   3  -2   30.94    1.31
   7  -3  -2  129.83    5.12
  -7  -3   2  128.15    5.31
  -7  -3   2  125.12    5.47
  -7   3   2  127.44    4.74
   7   3  -2  130.66    5.17
  -7   3   2  125.09    8.17
  -5  -3   2    1.34    0.24
   5  -3  -2    1.11    0.21
   5  -3  -2    1.24    0.24
  -5   3   2    1.20    0.19
  -5   3   2    1.13    0.23
  -5   3   2    0.81    0.20
   5   3  -2    0.85    0.36
  -3  -3   2  235.80   11.80
   3  -3  -2  222.86   11.05
   3  -3  -2  218.83   10.51
   3  -3  -2  234.43   12.37
  -3  -3   2  229.83    7.33
   3   3  -2  238.58    8.50
  -3   3   2  224.41   10.40
   3   3  -2  232.54    9.66
  -3   3   2  224.07    9.65
  -3   3   2  228.97    8.64
  -1  -3   2    0.50    0.14
  -1  -3   2    0.42    0.19
  -1  -3   2    0.53    0.20
   1  -3  -2    0.56    0.06
   1   3  -2    0.61    0.13
  -1   3   2    0.65    0.08
  -1   3   2    0.76    0.10
   1  -3   2   71.48   60.06
   1  -3   2   56.75   48.31
  -1  -3  -2   20.87    0.87
  -1   3  -2   61.64   49.91
   1   3   2   19.17    0.76
   1   3   2   19.23    1.00
  -1   3  -2   22.56    2.25
   3  -3   2  275.43   10.71
  -3  -3  -2  258.57   11.51
  -3  -3  -2  266.86   12.15
  -3   3  -2  278.51    8.55
   3   3   2  267.25   10.41
   3   3   2  259.03   11.09
  -3   3  -2  279.98   12.83
  -5  -3  -2    3.10    0.26
  -5  -3  -2    3.55    0.39
   5   3   2    3.72    0.36
  -5   3  -2    4.38    0.52
   5   3   2    4.44    0.30
  -5   3  -2    3.59    0.34
  -7  -3  -2   47.82    2.10
   7  -3   2   43.85    1.95
   7   3   2   44.78    1.82
  -7   3  -2   49.46    1.67
   7   3   2   45.68    2.03
   9  -3   2   55.46    2.99
  -9  -3  -2   56.65    3.01
  -9   3  -2   57.56    3.54
   9   3   2   57.74    2.88
 -11  -3  -2    2.22    0.47
 -11   3  -2    1.57    0.49
  11   3   2    1.49    0.53
 -13  -3  -2   16.24    1.39
  13  -3   2   16.42    1.81
  13   3   2   16.91    1.33
 -13   3  -2   17.29    1.24
  15  -3   2    4.48    0.74
 -15   3  -2    5.09    0.74
  15   3   2    4.57    0.60
 -16  -4   2    4.23    0.69
 -16   4   2    2.73    0.58
  16   4  -2    3.51    0.72
 -14  -4   2   14.67    1.57
  14  -4  -2   12.50    1.20
  14   4  -2   15.86    1.10
 -14   4   2   17.34    1.23
 -12  -4   2   10.82    0.89
  12  -4  -2    9.43    0.97
  12   4  -2    8.65    0.76
 -12   4   2   11.37    0.87
  10  -4  -2    0.35    0.41
 -10  -4   2   -0.28    0.47
  10   4  -2   -0.22    0.45
 -10   4   2    0.10    0.41
  -8  -4   2  111.11    4.59
  -8  -4   2  113.41    3.69
   8  -4  -2  118.87    4.72
   8   4  -2  113.99    5.14
  -8   4   2  110.39    3.58
  -6  -4   2   35.75    1.51
   6  -4  -2   37.96    1.54
   6  -4  -2   37.80    1.42
  -6  -4   2   40.53    1.67
   6   4  -2   38.37    1.26
  -6   4   2   37.42    1.34
  -6   4   2   38.34    1.45
  -4  -4   2   38.12    1.10
  -4  -4   2   40.54    1.46
   4  -4  -2   36.07    1.17
   4  -4  -2   37.52    1.59
   4  -4  -2   36.34    1.41
  -4   4   2   40.83    1.46
   4   4  -2   38.93    1.50
  -4   4   2   38.89    1.70
   4   4  -2   34.48    1.55
  -4   4   2   37.71    1.43
   2  -4  -2   23.03    0.92
  -2  -4   2   25.79    0.72
  -2  -4   2   24.12    1.08
   2  -4  -2   22.68    1.01
   2  -4  -2   24.94    1.21
  -2   4   2   24.45    1.21
   2   4  -2   25.87    1.23
  -2   4   2   23.71    1.02
   2   4  -2   24.89    0.73
   0  -4   2   95.74    4.25
   0  -4   2   96.27    4.31
   0  -4  -2   96.18    4.20
   0  -4  -2   97.61    4.11
   0   4  -2   91.98    4.23
   0   4   2  101.08    4.33
   0   4  -2   97.35    4.35
   0   4   2   96.29    5.47
   2  -4   2   64.31    2.51
  -2  -4  -2   62.19    2.74
   2  -4   2   67.37    2.62
  -2  -4  -2   62.88    3.29
   2   4   2   65.31    2.73
  -2   4  -2   67.10    2.11
   2   4   2   67.57    2.03
  -2   4  -2   61.10    2.59
  -4  -4  -2    8.60    0.63
  -4  -4  -2    9.17    0.53
   4  -4   2    9.78    0.71
   4   4   2    8.59    0.52
  -4   4  -2    9.32    0.52
   4   4   2    8.65    0.62
   4   4   2    8.43    0.49
  -6  -4  -2   92.56    3.69
   6  -4   2   91.43    2.68
   6   4   2   87.68    2.64
   6   4   2   89.77    3.47
  -6   4  -2   81.07    4.82
  -8  -4  -2   34.44    1.59
   8  -4   2   37.71    1.81
   8   4   2   39.42    1.75
  -8   4  -2   36.25    2.00
   8   4   2   36.48    1.39
  10  -4   2    2.42    0.64
 -10  -4  -2    3.13    0.67
  10   4   2    2.82    0.58
 -10   4  -2    2.52    0.61
 -12  -4  -2    9.14    0.89
  12  -4   2   11.99    1.33
 -12   4  -2    9.83    0.82
  14  -4   2   10.08    0.90
 -14  -4  -2    9.53    1.11
 -14   4  -2   10.38    1.16
  14   4   2    9.83    1.12
 -15  -5   2   10.54    1.32
  15  -5  -2   13.70    1.26
  15   5  -2   12.70    1.43
 -15   5   2   13.35    1.09
 -13  -5   2   71.50    4.59
  13  -5  -2   75.41    4.75
 -13   5   2   78.33    4.73
  13   5  -2   77.76    4.14
  11  -5  -2  122.38    5.60
 -11  -5   2  120.80    5.04
 -11   5   2  123.47    4.18
  11   5  -2  116.97    4.61
  -9  -5   2  209.65   12.40
  -9  -5   2  210.21    6.43
   9  -5  -2  227.26    7.57
   9   5  -2  234.49    6.99
  -9   5   2  222.24    6.75
  -7  -5   2   41.57    1.74
   7  -5  -2   40.90    1.52
   7  -5  -2   43.29    1.43
  -7   5   2   41.76    1.65
   7   5  -2   41.57    1.31
  -7   5   2   41.41    1.73
   5  -5  -2  161.01    7.64
  -5  -5   2  156.61    8.20
   5  -5  -2  159.01   10.74
  -5  -5   2  165.36    5.80
   5  -5  -2  161.91    6.14
  -5   5   2  166.44    6.74
   5   5  -2  159.33    6.72
  -5   5   2  160.96    5.74
  -3  -5   2 1000.00   32.37
   3  -5  -2  983.37   45.23
   3   5  -2  969.69   35.44
  -1  -5   2    3.38    0.24
  -1  -5   2    4.09    0.33
   1  -5  -2    3.60    0.11
  -1  -5   2    3.23    0.22
   1  -5  -2    3.53    0.34
   1   5  -2    3.07    0.28
  -1   5   2    4.41    0.38
  -1  -5  -2   11.58    0.64
   1  -5   2   11.03    0.48
  -1  -5  -2   12.07    0.55
   1  -5   2   11.75    0.58
  -1  -5  -2   12.09    0.60
   1   5   2   11.86    0.57
  -1   5  -2   11.33    0.61
  -1   5  -2   11.33    0.46
   1   5   2   12.37    0.55
  -3  -5  -2  664.34   32.15
   3  -5   2  709.91   27.14
  -3  -5  -2  710.39   23.13
   3   5   2  687.88   26.05
  -3   5  -2  706.43   21.09
   3   5   2  690.09   36.45
   5  -5   2  185.97    5.69
  -5  -5  -2  195.77    8.30
  -5  -5  -2  201.48    9.73
   5   5   2  195.12    6.83
   5   5   2  200.68    8.35
  -5   5  -2  194.80    9.79
  -7  -5  -2    2.03    0.60
   7  -5   2    2.35    0.34
   7   5   2    2.62    0.52
   7   5   2    2.95    1.13
   9  -5   2  243.71    9.33
  -9  -5  -2  257.18   11.52
  -9   5  -2  248.77    9.40
   9   5   2  257.57    7.93
  11  -5   2   64.08    2.42
 -11  -5  -2   62.35    2.37
 -11   5  -2   61.65    3.36
  11   5   2   62.79    2.33
 -13  -5  -2   26.35    1.42
  13  -5   2   22.85    1.85
 -13   5  -2   22.61    2.29
  13   5   2   22.88    1.69
  15  -5   2   11.64    1.22
 -15  -5  -2   12.63    1.92
  15   5   2   11.78    1.35
 -15   5  -2   10.62    1.25
  16  -6  -2    4.07    0.85
  16   6  -2    3.01    0.73
 -16   6   2    3.60    0.72
  14  -6  -2   -0.03    0.37
 -14  -6   2    0.62    0.49
 -14   6   2    1.23    0.47
  14   6  -2    0.35    0.64
 -12  -6   2   49.47    2.52
  12  -6  -2   48.52    2.49
 -12   6   2   46.12    2.57
  12   6  -2   48.54    2.30
 -10  -6   2   16.48    0.98
  10  -6  -2   17.96    0.86
  10   6  -2   14.97    1.13
 -10   6   2   16.04    0.89
  -8  -6   2    2.37    0.22
  -8  -6   2    2.24    0.36
   8  -6  -2    2.64    0.58
   8  -6  -2    1.94    0.27
  -8   6   2    2.56    0.38
   8   6  -2    3.22    0.67
   6  -6  -2  108.95    3.52
  -6  -6   2  104.51    5.16
  -6  -6   2  110.22    3.64
   6  -6  -2  109.19    4.73
  -6   6   2  107.39    3.69
  -6   6   2  104.86    4.35
   6   6  -2  110.22    4.41
  -4  -6   2    1.39    0.23
  -4  -6   2    1.78    0.24
   4  -6  -2    1.77    0.22
   4  -6  -2    1.70    0.20
  -4   6   2    2.07    0.22
   4   6  -2    1.57    0.37
  -4   6   2    1.89    0.21
   2  -6  -2   18.47    0.80
   2  -6  -2   17.85    0.94
  -2  -6   2   20.39    0.76
   2  -6  -2   18.40    0.64
  -2  -6   2   19.89    0.91
   2   6  -2   20.45    0.95
   2   6  -2   18.13    0.55
  -2   6   2   18.54    0.70
  -2   6   2   19.06    1.05
   0  -6  -2  195.13    6.16
   0  -6   2  195.85    8.85
   0  -6   2  199.90    8.43
   0  -6  -2  197.59    8.94
   0  -6  -2  200.43    7.70
   0   6   2  195.57    8.66
   0   6  -2  198.81    6.60
   0   6  -2  191.94    6.97
   2  -6   2   33.28    1.10
  -2  -6  -2   31.91    1.61
   2  -6   2   30.88    1.34
  -2  -6  -2   32.25    1.32
  -2  -6  -2   32.54    1.16
  -2   6  -2   32.54    1.30
   2   6   2   32.48    1.23
  -2   6  -2   31.28    1.23
   2   6   2   32.18    1.47
  -4  -6  -2   18.91    0.92
   4  -6   2   18.92    0.95
  -4  -6  -2   22.57    2.68
   4   6   2   19.96    0.91
   4   6   2   17.80    0.89
  -4   6  -2   17.61    0.98
   4   6   2   18.19    0.68
   6  -6   2   47.34    1.98
  -6  -6  -2   49.98    1.95
  -6   6  -2   47.61    2.59
   6   6   2   47.41    1.73
   6   6   2   45.67    1.66
   8   6   2    2.06    0.37
  -8   6  -2    2.16    0.53
 -10  -6  -2    1.90    0.49
  10  -6   2    2.72    0.58
  10   6   2    2.32    0.62
 -10   6  -2    2.75    0.61
 -12  -6  -2   18.56    1.28
  12  -6   2   19.54    1.41
 -12   6  -2   16.77    1.30
  12   6   2   18.40    1.25
 -14  -6  -2    0.17    0.43
  14  -6   2    0.41    0.51
 -14   6  -2   -0.23    0.61
  14   6   2    0.32    0.66
  15  -7  -2   -0.46    0.44
 -15  -7   2    0.50    0.47
 -15   7   2   -0.64    0.60
  15   7  -2    0.28    0.50
  13  -7  -2   -0.43    0.59
 -13  -7   2    0.62    0.48
 -13   7   2   -0.02    0.35
  13   7  -2    1.66    0.81
  11  -7  -2   37.08    1.72
 -11  -7   2   33.94    1.60
 -11   7   2   39.55    1.34
  11   7  -2   36.21    1.28
   9  -7  -2   35.32    1.82
  -9  -7   2   35.32    1.59
  -9  -7   2   35.60    1.91
   9  -7  -2   34.34    3.04
   9   7  -2   36.74    1.91
  -9   7   2   36.13    1.19
  -7  -7   2    0.64    0.28
   7  -7  -2    1.05    0.24
  -7   7   2    0.86    0.21
   7   7  -2    0.60    0.35
  -5  -7   2   54.52    2.09
   5  -7  -2   50.35    1.99
  -5  -7   2   53.33    2.45
   5  -7  -2   53.88    2.06
   5  -7  -2   51.79    2.16
  -5   7   2   51.85    2.40
  -5   7   2   54.65    2.24
   5   7  -2   53.80    2.36
  -3  -7   2   46.86    2.13
   3  -7  -2   43.89    2.27
   3  -7  -2   44.44    1.13
  -3  -7   2   47.36    1.39
   3  -7  -2   44.87    1.71
  -3   7   2   44.29    1.79
  -3   7   2   46.61    1.84
   3   7  -2   49.84    1.87
   3   7  -2   46.90    2.58
  -3   7   2   43.90    1.72
  -1  -7   2   25.16    0.85
  -1  -7   2   26.26    0.99
  -1  -7   2   26.43    1.13
   1  -7  -2   24.73    0.99
  -1   7   2   26.91    1.25
   1   7  -2   25.33    0.92
  -1  -7  -2   21.34    0.85
   1  -7   2   20.72    1.09
  -1  -7  -2   20.93    0.72
   1  -7   2   20.72    0.90
  -1  -7  -2   20.44    0.67
  -1   7  -2   21.61    0.76
   1   7   2   20.56    0.84
   1   7   2   19.29    0.67
  -1   7  -2   21.20    1.08
  -3  -7  -2   30.62    1.15
  -3  -7  -2   29.08    1.28
   3  -7   2   35.62    1.31
  -3  -7  -2   31.66    1.17
   3  -7   2   34.83    1.36
   3   7   2   31.58    1.47
   3   7   2   31.51    0.97
   3   7   2   29.34    1.41
  -3   7  -2   33.60    1.43
  -5  -7  -2   10.09    0.53
   5  -7   2   12.86    0.50
  -5  -7  -2   11.94    0.71
   5   7   2   11.49    0.63
  -5   7  -2   12.56    0.65
   7  -7   2    0.74    0.57
  -7  -7  -2   -0.02    0.40
  -7   7  -2    0.35    0.45
   9  -7   2   26.81    1.57
  -9  -7  -2   24.06    1.22
  -9   7  -2   26.82    1.82
   9   7   2   24.07    1.24
  11  -7   2   12.94    0.98
 -11  -7  -2   11.51    0.94
 -11   7  -2   10.78    1.11
  11   7   2    9.67    0.93
  13  -7   2    0.35    0.47
 -15  -7  -2   -0.44    0.57
  15   7   2   -1.08    0.78
 -15   7  -2    1.05    0.60
 -16  -8   2    5.12    1.17
  16  -8  -2    6.70    1.02
 -16   8   2    6.97    0.90
  16   8  -2    8.76    1.15
 -14  -8   2   37.71    2.66
  14  -8  -2   31.18    2.30
  14   8  -2   35.72    2.08
 -14   8   2   37.38    2.94
  12  -8  -2    0.95    0.58
 -12  -8   2    2.24    0.53
 -12   8   2    1.78    0.40
 -10  -8   2    0.72    0.10
  10  -8  -2    0.75    0.19
 -10  -8   2    0.08    0.51
 -10   8   2    0.09    0.41
  10   8  -2    1.61    0.52
   8  -8  -2  253.53   14.37
   8  -8  -2  273.01   11.36
  -8  -8   2  264.22    6.75
  -8   8   2  265.30    9.45
   8   8  -2  267.40    8.56
   6  -8  -2   11.34    0.59
  -6  -8   2   12.56    0.57
   6  -8  -2   12.43    0.60
  -6   8   2   11.74    0.68
   6   8  -2   13.44    0.61
  -6   8   2   10.68    0.61
  -6   8   2   10.29    0.51
   4  -8  -2   68.29    3.39
   4  -8  -2   67.58    2.26
  -4  -8   2   72.92    2.62
  -4  -8   2   70.05    3.25
   4  -8  -2   71.64    3.32
  -4   8   2   70.89    2.96
  -4   8   2   71.84    2.94
   4   8  -2   74.70    3.30
  -4   8   2   70.72    3.05
  -2  -8   2  277.13    9.32
  -2  -8   2  272.45   13.79
   2  -8  -2  270.53   11.37
   2  -8  -2  266.77   10.60
   2  -8  -2  267.11   10.30
   2   8  -2  258.18   14.21
   2   8  -2  278.34   14.10
   0  -8  -2   42.91    1.67
   0  -8  -2   39.61    1.84
   0  -8   2   46.33    2.30
   0  -8  -2   42.33    1.80
   0  -8   2   42.82    2.02
   0   8  -2   43.97    1.53
   0   8   2   43.84    1.82
   2  -8   2  137.02    6.39
  -2  -8  -2  146.43    7.03
  -2  -8  -2  146.99    6.75
  -2  -8  -2  143.65    6.78
   2  -8   2  140.45    5.35
   2   8   2  145.84    5.66
  -2   8  -2  145.47    5.54
   2   8   2  145.31    5.01
  -4  -8  -2   33.62    1.35
  -4  -8  -2   31.46    1.44
   4  -8   2   33.94    1.26
  -4   8  -2   35.09    1.57
   4   8   2   34.47    1.21
   4   8   2   34.11    1.20
   6  -8   2   38.44    1.33
  -6  -8  -2   36.31    1.54
  -6   8  -2   38.09    1.71
   6   8   2   38.77    1.12
   8  -8   2  138.32    4.85
  -8  -8  -2  136.77    5.70
   8   8   2  144.08    3.97
  -8   8  -2  137.61    5.13
  10  -8   2    2.85    0.50
 -10  -8  -2    3.06    0.42
  10   8   2    2.91    0.62
 -10   8  -2    2.38    0.44
  12  -8   2   -0.20    0.44
 -12  -8  -2    0.42    0.33
  12   8   2    0.56    0.45
 -12   8  -2    0.88    0.59
 -14  -8  -2   35.68    2.60
  14  -8   2   39.71    2.84
  14   8   2   34.63    2.81
 -14   8  -2   36.60    3.21
 -15  -9   2    4.70    0.69
  15  -9  -2    4.31    0.73
 -15   9   2    3.76    0.65
  15   9  -2    4.57    0.97
  13  -9  -2    5.67    0.61
 -13  -9   2    7.02    0.85
 -13   9   2    5.68    0.54
  13   9  -2    6.79    0.57
 -11  -9   2   15.91    0.92
  11  -9  -2   17.47    1.19
  11   9  -2   19.19    1.22
 -11   9   2   18.88    1.00
   9  -9  -2   54.06   12.23
  -9  -9   2   49.71    1.60
   9  -9  -2   59.53   14.29
   9   9  -2   52.83    1.70
  -9   9   2   52.30    6.82
   7  -9  -2   22.11    1.26
   7  -9  -2   17.89    1.16
  -7  -9   2   21.81    1.05
  -7   9   2   19.99    0.73
   7   9  -2   22.04    1.08
  -7   9   2   19.29    1.39
   5  -9  -2   35.30    1.63
   5  -9  -2   32.40    1.70
  -5  -9   2   32.66    1.62
  -5  -9   2   31.22    2.38
   5  -9  -2   31.00    1.73
  -5   9   2   34.89    1.65
  -5   9   2   32.86    1.34
   5   9  -2   33.05    1.25
  -5   9   2   32.45    1.46
  -3  -9   2  345.98   16.08
   3  -9  -2  348.41   11.89
   3  -9  -2  366.06   18.51
  -3  -9   2  366.08   11.54
   3  -9  -2  343.48   14.09
  -3   9   2  367.25   12.11
   3   9  -2  360.81   12.91
  -3   9   2  361.72   12.18
   1  -9  -2   52.40    2.31
  -1  -9   2   53.57    1.81
  -1  -9   2   57.82    1.96
   1  -9  -2   52.68    2.75
   1  -9  -2   55.64    2.22
  -1  -9   2   57.10    2.14
   1  -9  -2   55.48    2.13
   1   9  -2   53.84    3.10
  -1  -9  -2    4.10    0.26
   1  -9   2    4.15    0.42
  -1  -9  -2    3.61    0.23
   1  -9   2    4.01    0.45
  -1  -9  -2    4.34    0.36
   1   9   2    4.06    0.20
  -1   9  -2    4.39    0.39
  -3  -9  -2  300.92    8.43
   3  -9   2  294.50   13.08
  -3  -9  -2  294.30   12.65
  -3  -9  -2  307.44   13.84
   3  -9   2  301.90   11.05
  -3   9  -2  298.07   11.56
   3   9   2  315.95   11.66
   3   9   2  301.38    9.47
  -5  -9  -2   25.88    1.10
   5  -9   2   23.95    0.82
  -5  -9  -2   21.80    1.12
   5   9   2   25.99    1.01
  -5   9  -2   23.01    1.23
  -7  -9  -2    3.37    0.38
   7   9   2    3.00    0.48
  -7   9  -2    3.39    0.49
  -9  -9  -2   52.74    2.79
   9  -9   2   55.22    2.42
   9   9   2   54.88    2.31
  -9   9  -2   52.74    2.33
 -11  -9  -2    3.80    0.55
  11   9   2    3.04    0.71
  13  -9   2   15.42    1.56
 -13  -9  -2   14.37    0.91
  13   9   2   17.48    1.32
 -13   9  -2   15.84    1.34
  15  -9   2    7.02    1.19
 -15  -9  -2    7.15    0.66
 -15   9  -2    8.04    1.22
  15   9   2    6.10    0.93
 -16 -10   2    9.09    1.05
  16 -10  -2    6.91    1.19
 -16  10   2    8.05    0.99
  16  10  -2    9.00    1.02
  14 -10  -2   26.58    2.49
 -14 -10   2   25.72    2.20
 -14  10   2   31.92    1.69
  14  10  -2   28.56    2.44
  12 -10  -2    6.67    0.68
 -12 -10   2    6.65    0.73
 -12  10   2    6.31    0.58
  12  10  -2    6.93    0.62
 -10 -10   2   13.08    0.83
  10 -10  -2    9.70    1.23
  10 -10  -2   12.52    0.88
 -10 -10   2   11.79    0.79
 -10  10   2   12.73    0.68
  10  10  -2   13.41    0.96
  -8 -10   2  156.34    5.15
   8 -10  -2  147.34   11.38
   8 -10  -2  163.76    6.09
  -8  10   2  152.83    5.28
   8  10  -2  151.03    5.11
   6 -10  -2   65.63    2.87
   6 -10  -2   66.42    3.24
  -6 -10   2   67.47    2.75
  -6  10   2   68.08    2.64
  -6  10   2   62.46    3.61
   6  10  -2   61.61    2.45
  -6  10   2   68.55    2.13
   4 -10  -2   46.82    1.93
  -4 -10   2   46.33    2.08
  -4 -10   2   46.42    1.94
   4 -10  -2   49.87    2.26
   4 -10  -2   50.08    2.63
  -4  10   2   50.70    1.93
   4  10  -2   50.73    2.13
  -4  10   2   50.21    2.14
  -4  10   2   49.63    1.74
   2 -10  -2  331.66   10.41
   2 -10  -2  334.90   14.96
  -2 -10   2  323.82   13.53
   2 -10  -2  322.49   12.50
  -2 -10   2  314.11   13.32
  -2  10   2  331.64   13.68
   2  10  -2  331.19   18.07
   0 -10   2  409.73   16.72
   0 -10   2  382.17   19.07
   0 -10  -2  391.16   16.23
   0 -10  -2  411.66   17.19
   0 -10   2  396.37   18.39
   2 -10   2  149.43    6.04
  -2 -10  -2  155.12    7.63
  -2 -10  -2  149.34    6.41
   2 -10   2  153.17    5.77
  -2 -10  -2  150.76    5.41
   2  10   2  149.90    5.19
   2  10   2  157.27    5.37
  -2  10  -2  149.61    7.20
  -4 -10  -2   54.11    2.33
  -4 -10  -2   57.32    2.59
   4 -10   2   56.01    1.86
   4 -10   2   55.66    2.55
  -4 -10  -2   58.07    2.06
   4  10   2   58.49    1.80
   4  10   2   57.31    3.08
  -6 -10  -2  101.89    4.19
   6 -10   2  104.02    3.43
   6  10   2  103.27    3.16
  -6  10  -2   95.12    4.38
   8 -10   2  120.08    3.30
  -8 -10  -2  124.19    5.22
  -8  10  -2  121.81    4.35
   8  10   2  118.16    4.98
  10 -10   2    5.43    0.76
 -10 -10  -2    4.32    0.55
 -10  10  -2    5.81    0.63
  10  10   2    4.49    0.85
  12 -10   2    8.54    0.99
 -12 -10  -2    9.81    0.87
  12  10   2   10.47    0.97
 -12  10  -2    7.95    0.75
  14 -10   2   30.91    3.14
 -14 -10  -2   32.44    2.94
 -14  10  -2   31.42    2.90
  14  10   2   29.43    3.11
 -15 -11   2   -0.77    0.54
  15 -11  -2   -0.50    0.34
  15  11  -2   -0.32    0.72
 -15  11   2   -0.10    0.32
  13 -11  -2    1.30    0.52
 -13  11   2    0.71    0.38
  13  11  -2    0.74    0.65
 -11 -11   2   12.97    0.93
  11 -11  -2   12.93    1.18
 -11  11   2   13.48    0.83
  11  11  -2   13.32    0.97
   9 -11  -2    5.33    0.52
   9 -11  -2    5.80    0.55
  -9 -11   2    6.18    0.70
  -9  11   2    5.88    0.51
   9  11  -2    6.04    0.51
   7 -11  -2   60.76   28.98
   7 -11  -2   46.92    4.53
  -7 -11   2   47.81    1.99
  -7  11   2   44.61    3.95
  -7  11   2   55.12   17.29
   7  11  -2   43.46    2.10
   5 -11  -2   63.58    2.45
  -5 -11   2   59.98    2.33
   5 -11  -2   61.22    4.86
   5 -11  -2   60.10    3.12
  -5  11   2   62.34    2.13
  -5  11   2   61.78    3.48
   5  11  -2   65.71    2.99
  -5  11   2   62.18    2.58
   3 -11  -2    0.04    0.33
  -3 -11   2    0.09    0.22
   3 -11  -2    0.44    0.14
  -3 -11   2    0.39    0.24
   3 -11  -2    0.74    0.19
   3  11  -2    0.64    0.43
  -3  11   2    0.32    0.11
  -3  11   2    0.46    0.15
   1 -11  -2  182.56    5.99
  -1 -11   2  181.09    8.02
   1 -11  -2  184.13    8.52
   1 -11  -2  175.73    6.72
  -1 -11   2  176.17    7.88
  -1 -11   2  184.60    6.34
   1 -11  -2  192.31    7.90
   1 -11   2  173.76    6.15
  -1 -11  -2  175.34    8.73
  -1 -11  -2  175.43    6.43
   1 -11   2  174.76    7.64
  -1 -11  -2  178.17    7.99
  -1  11  -2  169.15    7.30
   1  11   2  174.16    6.46
   1  11   2  176.11    6.07
  -3 -11  -2    2.42    0.35
  -3 -11  -2    3.06    0.27
   3 -11   2    3.07    0.41
   3  11   2    2.33    0.28
  -3  11  -2    2.88    0.24
   3  11   2    2.66    0.20
  -5 -11  -2   28.78    1.35
   5 -11   2   28.03    0.89
  -5 -11  -2   28.97    2.08
  -5 -11  -2   28.09    1.33
   5  11   2   32.19    1.16
  -7 -11  -2    5.04    0.64
   7 -11   2    6.17    0.80
  -7  11  -2    6.05    0.52
   7  11   2    6.49    0.48
  -9 -11  -2    3.06    0.59
   9 -11   2    2.71    0.62
  -9  11  -2    1.76    0.45
   9  11   2    2.68    0.67
  11 -11   2   39.38    2.72
 -11 -11  -2   36.55    2.06
  11  11   2   35.15    2.26
 -11  11  -2   40.87    1.81
  13 -11   2   10.55    1.37
 -13 -11  -2   12.16    0.82
  13  11   2   10.70    1.34
 -13  11  -2   10.09    1.14
 -16 -12   2    3.91    0.75
  16 -12  -2    2.42    0.67
 -16  12   2    3.27    0.70
  14 -12  -2   42.35    2.88
 -14 -12   2   44.59    3.05
 -14  12   2   41.44    3.85
  14  12  -2   47.09    3.65
  12 -12  -2    5.18    0.68
 -12  12   2    4.22    0.43
  12  12  -2    3.52    0.96
  10 -12  -2    6.84    0.52
 -10 -12   2    5.76    0.56
 -10  12   2    6.00    0.61
  10  12  -2    7.11    0.76
   8 -12  -2  146.65    5.44
  -8 -12   2  150.73    4.45
  -8  12   2  148.91    6.35
   8  12  -2  153.47    4.88
  -6 -12   2   62.99    2.04
   6 -12  -2   57.84    3.39
   6 -12  -2   59.95    2.87
  -6  12   2   61.84    2.18
  -6  12   2   63.51    2.00
   6  12  -2   59.64    2.28
  -6  12   2   60.14    3.09
  -4 -12   2   35.98    1.35
   4 -12  -2   39.48    2.10
   4 -12  -2   37.82    1.97
   4  12  -2   39.14    1.41
  -4  12   2   38.15    1.70
  -4  12   2   38.08    1.44
  -4  12   2   39.00    1.44
  -2 -12   2  351.44   83.45
   2 -12  -2  296.76   11.71
   2 -12  -2  308.34   11.18
   2 -12  -2  298.56   11.68
  -2 -12   2  344.74   78.25
   2 -12  -2  290.77   13.37
   2  12  -2  358.66   57.73
   0 -12  -2  206.03    9.10
   0 -12  -2  210.09    9.15
   0 -12   2  222.95    9.04
   0 -12   2  205.34    7.57
   0 -12   2  211.01    8.26
   0 -12  -2  207.36    8.77
  -2 -12  -2  146.09    6.05
  -2 -12  -2  152.15    5.67
   2 -12   2  151.25    6.24
   2 -12   2  154.96    6.14
  -2 -12  -2  151.89    5.33
   2  12   2  149.76    4.06
   2  12   2  154.14    5.71
  -2  12  -2  149.17    8.03
  -4 -12  -2   51.03    2.11
  -4 -12  -2   47.25    2.96
  -4 -12  -2   48.30    1.58
   4 -12   2   51.08    1.80
   4 -12   2   50.58    1.95
   4  12   2   49.96    1.70
   4  12   2   48.58    2.09
  -6 -12  -2   64.26    2.85
  -6 -12  -2   68.83    2.29
   6 -12   2   69.51    2.52
   6  12   2   70.53    2.23
  -6  12  -2   74.26    2.66
   8 -12   2  136.69    5.03
  -8 -12  -2  127.44    5.19
  -8  12  -2  132.28    4.63
   8  12   2  126.13    4.53
 -10 -12  -2    0.18    0.32
  10 -12   2    0.56    0.54
 -10  12  -2    0.06    0.38
  10  12   2    0.21    0.31
 -12 -12  -2    7.87    0.71
  12 -12   2    8.02    0.93
  12  12   2    8.56    0.91
 -14 -12  -2   25.78    1.76
  14 -12   2   26.88    2.66
  14  12   2   28.13    1.98
 -14  12  -2   28.66    2.60
  15 -13  -2    1.11    0.71
 -15 -13   2    0.08    0.40
  15  13  -2    0.59    0.49
  13 -13  -2   13.73    1.13
 -13 -13   2   17.65    1.58
 -13  13   2   17.48    1.16
  13  13  -2   16.00    1.53
 -11 -13   2   69.00    2.71
 -11 -13   2   65.77    4.87
  11 -13  -2   73.81    4.07
  11  13  -2   78.18    3.28
 -11  13   2   70.99    2.90
   9 -13  -2   38.25    1.83
  -9 -13   2   34.05    1.25
  -9  13   2   35.37    1.71
   9  13  -2   35.50    1.47
  -7 -13   2   65.65    2.75
   7 -13  -2   67.68    2.52
  -7  13   2   66.30    3.35
  -7  13   2   69.68    2.66
   7  13  -2   65.58    2.39
   5 -13  -2   41.85    2.22
  -5 -13   2   43.37    1.51
   5 -13  -2   44.52    1.57
   5  13  -2   45.04    2.03
  -5  13   2   43.64    1.91
  -5  13   2   43.76    2.45
  -5  13   2   43.07    1.81
   3 -13  -2  391.28   20.95
   3 -13  -2  395.68   15.92
   3 -13  -2  410.13   13.58
  -3 -13   2  395.95   12.80
  -3 -13   2  389.55   17.05
  -3  13   2  414.69   16.43
  -3  13   2  393.50   13.71
   3  13  -2  405.42   17.57
  -3  13   2  396.10   10.18
  -1 -13   2    6.98   15.60
  -1 -13   2    3.82    1.18
   1 -13  -2    3.25    0.34
   1 -13  -2    3.38    0.18
   1 -13  -2    3.72    0.18
   1 -13  -2    3.27    0.20
   1 -13   2   16.10    0.83
  -1 -13  -2   14.89    0.73
  -1 -13  -2   15.06    0.52
   1 -13   2   14.94    0.82
  -1 -13  -2   14.39    0.84
  -1  13  -2   13.89    0.91
   1  13   2   13.51    0.56
   1  13   2   13.75    0.53
   3 -13   2  295.76   12.09
  -3 -13  -2  291.53   10.36
   3 -13   2  282.55   15.90
  -3 -13  -2  296.97   12.07
  -3 -13  -2  301.33   11.14
   3  13   2  295.90   12.15
   3  13   2  299.66    8.86
  -5 -13  -2   48.30    3.13
  -5 -13  -2   52.00    3.95
   5 -13   2   57.31    2.01
  -5 -13  -2   51.21    1.75
   5  13   2   51.51    1.40
   7 -13   2   13.78    0.77
  -7 -13  -2   15.34    0.84
  -7  13  -2   12.95    0.90
   7  13   2   11.53    0.68
   9 -13   2   54.28    2.06
  -9 -13  -2   56.73    2.46
  -9  13  -2   56.01    2.71
   9  13   2   52.31    1.93
 -11 -13  -2   18.56    1.24
  11 -13   2   19.76    1.17
 -11  13  -2   18.18    1.32
  11  13   2   17.77    1.25
  13 -13   2   31.30    2.57
 -13 -13  -2   29.17    2.40
  13  13   2   23.19    2.31
 -13  13  -2   27.90    2.36
  14 -14  -2   28.56    2.56
 -14 -14   2   33.74    3.65
  14  14  -2   31.46    2.23
 -14  14   2   31.57    2.37
  12 -14  -2    1.57    0.58
 -12 -14   2    1.29    0.50
 -12  14   2    1.39    0.38
  10 -14  -2   12.86    0.96
 -10 -14   2   12.92    0.92
  10  14  -2   12.83    0.78
 -10  14   2   13.27    0.79
  -8 -14   2  143.57    5.99
   8 -14  -2  140.35    4.96
  -8  14   2  140.95    4.91
   8  14  -2  136.90    4.01
  -6 -14   2    0.65    0.43
  -6  14   2    0.59    0.20
   6  14  -2    0.62    0.30
  -6  14   2    0.50    0.11
   4 -14  -2   49.78    2.03
  -4 -14   2   48.53    2.04
  -4  14   2   47.87    2.15
  -4  14   2   48.06    2.55
   4  14  -2   45.00    1.70
  -4  14   2   47.96    2.07
   2 -14  -2   93.83    3.62
  -2 -14   2   92.26    3.15
   2 -14  -2   96.01    2.98
  -2 -14   2   92.75    5.17
   2 -14  -2   92.58    3.64
   2  14  -2   95.89    4.84
  -2  14   2   95.55    3.05
   0 -14  -2   27.05    1.04
   0 -14   2   23.83    1.03
   0 -14  -2   25.66    0.94
   0 -14   2   25.54    1.03
   0 -14   2   23.62    1.36
   0 -14  -2   26.90    1.00
   0 -14  -2   27.91    1.04
   0  14   2   26.32    1.16
  -2 -14  -2   70.88    3.06
   2 -14   2   67.97    2.72
   2 -14   2   65.95    2.60
  -2 -14  -2   69.78    3.55
  -2 -14  -2   71.98    3.46
   2  14   2   68.66    1.81
   2  14   2   66.55    2.13
   4 -14   2   62.10    2.49
  -4 -14  -2   63.30    2.26
   4 -14   2   59.32    2.36
  -4 -14  -2   62.36    2.97
  -4 -14  -2   59.60    2.83
   4  14   2   60.95    3.13
   4  14   2   65.57    2.13
  -6 -14  -2    3.31    0.34
   6 -14   2    2.18    0.50
  -6  14  -2    2.96    0.33
   6  14   2    2.86    0.49
   8 -14   2   72.60    3.82
  -8 -14  -2   72.50    3.19
  -8  14  -2   67.31    2.87
   8  14   2   73.83    3.23
  10 -14   2    6.89    0.83
 -10 -14  -2    9.06    1.70
  10  14   2    9.48    3.36
 -10  14  -2    8.10    0.84
  12 -14   2    1.34    0.43
 -12 -14  -2    0.28    0.60
 -12  14  -2    1.52    0.45
  12  14   2    1.01    0.42
 -14 -14  -2   20.76    2.36
  14 -14   2   19.51    1.67
 -14  14  -2   20.22    2.26
  14  14   2   21.58    2.23
  15 -15  -2   -0.08    0.65
 -15 -15   2    0.03    0.66
 -15  15   2   -0.30    0.46
  15  15  -2    0.07    0.50
  13 -15  -2    0.49    0.40
  13  15  -2    0.37    0.37
 -13  15   2    0.90    0.41
  11 -15  -2   32.62    1.67
 -11 -15   2   31.18    2.05
  11  15  -2   32.44    1.83
 -11  15   2   30.74    1.82
   9 -15  -2   16.22    1.17
  -9 -15   2   16.67    1.04
  -9  15   2   17.01    1.09
   9  15  -2   16.35    0.96
  -7 -15   2    0.21    0.44
   7 -15  -2    0.36    0.33
  -7  15   2    0.45    0.25
  -7  15   2    0.68    0.16
   7  15  -2    0.10    0.29
   5 -15  -2   85.51    3.18
  -5 -15   2   85.55    2.45
  -5  15   2   84.31    4.78
  -5  15   2   84.04    2.78
   5  15  -2   79.60    3.15
  -5  15   2   84.09    2.68
   3 -15  -2   17.44    0.59
   3 -15  -2   17.58    0.70
  -3 -15   2   14.31    0.83
  -3  15   2   18.53    0.79
   3  15  -2   17.10    0.83
  -3  15   2   16.65    0.83
  -3  15   2   18.11    0.97
   1 -15  -2   12.04    0.35
   1 -15  -2   12.07    0.38
   1 -15  -2   11.11    0.35
  -1 -15   2   11.56    0.58
  -1 -15   2   11.06    0.62
  -1  15   2   11.43    0.47
  -1  15   2   11.30    0.47
  -1 -15  -2   17.74    0.75
  -1 -15  -2   16.72    1.14
  -1 -15  -2   17.43    0.69
   1 -15   2   17.17    0.90
   1 -15   2   19.13    0.76
   1  15   2   15.71    0.84
   1  15   2   18.28    0.75
  -3 -15  -2   21.38    1.31
   3 -15   2   19.52    1.31
   3 -15   2   20.67    0.82
  -3 -15  -2   21.51    0.96
  -3 -15  -2   22.13    1.25
   3  15   2   22.52    0.95
   3  15   2   20.35    1.32
  -5 -15  -2   50.91    1.94
   5 -15   2   47.54    2.09
  -5 -15  -2   48.74    3.35
   5 -15   2   46.39    1.75
   5  15   2   49.43    1.49
  -7 -15  -2    3.28    0.40
   7 -15   2    2.84    0.43
   7  15   2    2.72    0.48
  -9 -15  -2   11.31    0.92
   9 -15   2   11.49    0.88
   9  15   2   13.06    1.24
  -9  15  -2   10.56    0.96
 -11 -15  -2    7.46    0.63
  11 -15   2    8.88    0.85
  11  15   2    8.26    0.70
 -11  15  -2    8.66    0.90
 -13 -15  -2    0.59    0.48
  13 -15   2    0.04    0.62
 -13  15  -2    0.77    0.51
  13  15   2    0.96    0.84
  14 -16  -2    0.95    0.50
  14  16  -2    1.15    0.58
 -14  16   2    0.22    0.67
  12 -16  -2   44.99    2.10
 -12 -16   2   39.60    2.65
 -12  16   2   41.26    2.01
  12  16  -2   41.94    2.45
  10 -16  -2    3.36    0.62
 -10 -16   2    4.72    0.68
 -10  16   2    4.62    0.50
  10  16  -2    4.70    0.52
   8 -16  -2   -0.19    0.39
  -8 -16   2    0.22    0.41
   8  16  -2    0.75    0.47
  -8  16   2    0.44    0.36
   6 -16  -2   42.30    1.90
  -6 -16   2   41.68    1.21
   6  16  -2   39.99    1.45
  -6  16   2   41.62    1.62
  -6  16   2   42.15    3.87
  -6  16   2   37.31    3.19
   4 -16  -2    3.38    0.26
   4 -16  -2    2.70    0.34
  -4 -16   2    3.40    0.39
   4  16  -2    2.52    0.46
  -4  16   2    2.89    0.25
  -4  16   2    2.90    0.19
  -4  16   2    2.43    0.22
   2 -16  -2    4.16    0.21
   2 -16  -2    4.29    0.25
   2 -16  -2    4.38    0.28
  -2 -16   2    4.63    0.37
  -2  16   2    4.11    0.22
  -2  16   2    3.83    0.20
   0 -16  -2   66.08    2.57
   0 -16  -2   67.63    2.61
   0 -16  -2   66.58    2.46
   0 -16   2   69.13    3.14
   0 -16   2   68.24    2.46
   0  16   2   66.66    3.24
  -2 -16  -2    7.08    0.41
  -2 -16  -2    7.53    0.36
   2 -16   2    7.11    0.46
   2 -16   2    6.83    0.49
   2  16   2    6.69    0.34
   2  16   2    6.31    0.32
   4 -16   2   13.24    0.72
   4 -16   2   11.34    0.62
  -4 -16  -2   13.76    0.80
  -4 -16  -2   13.52    0.67
  -4 -16  -2   12.87    1.11
   4  16   2   12.23    0.59
   6 -16   2   40.98    1.93
  -6 -16  -2   42.91    2.62
  -6 -16  -2   44.70    1.45
   6  16   2   41.57    1.43
  -6  16  -2   44.10    1.87
   8 -16   2    1.21    0.47
  -8 -16  -2    0.37    0.48
   8  16   2    0.46    0.37
  -8  16  -2   -0.04    0.55
  10 -16   2    0.73    0.62
 -10 -16  -2    0.10    0.48
  10  16   2    0.39    0.45
 -10  16  -2   -0.32    0.38
  12 -16   2   11.55    1.72
 -12 -16  -2   10.28    0.99
  12  16   2   10.86    0.99
 -12  16  -2   10.24    1.03
  14 -16   2    0.47    0.44
 -14 -16  -2    0.59    0.53
 -14  16  -2    0.11    0.40
  14  16   2    0.52    0.53
  15 -17  -2   12.79    1.50
 -15 -17   2   10.36    1.47
  15  17  -2    9.98    1.34
 -15  17   2   11.64    0.89
  13 -17  -2   44.55    3.74
 -13 -17   2   46.92    3.29
  13  17  -2   41.85    3.42
 -13  17   2   45.42    4.52
 -11 -17   2   53.17    2.58
  11 -17  -2   58.44    2.92
 -11  17   2   54.01    3.21
  11  17  -2   56.15    2.74
  -9 -17   2  141.41    6.31
   9 -17  -2  128.66    4.32
  -9  17   2  135.47    7.02
   9  17  -2  128.94    4.29
  -7 -17   2   50.25    2.07
   7 -17  -2   49.63    1.86
   7  17  -2   51.40    1.96
  -7  17   2   48.00    1.83
  -5 -17   2   64.03    2.57
   5 -17  -2   60.49    2.17
  -5  17   2   61.82    3.55
  -5  17   2   61.13    3.15
   5  17  -2   59.97    2.28
  -5  17   2   61.41    2.15
  -3 -17   2  505.78   18.52
   3 -17  -2  509.12   17.25
   3 -17  -2  488.30   15.33
  -3  17   2  500.51   16.97
  -3  17   2  489.45   29.01
   3  17  -2  516.80   19.01
  -1 -17   2   30.15    0.96
   1 -17  -2   28.93    1.35
  -1 -17   2   31.10    1.17
   1 -17  -2   30.20    1.15
   1 -17  -2   31.24    0.87
  -1  17   2   29.24    1.02
  -1  17   2   27.95    0.91
  -1 -17  -2   61.55    2.47
   1 -17   2   60.71    2.62
   1 -17   2   64.96    2.90
  -1 -17  -2   60.18    2.23
   1  17   2   67.59    2.31
   1  17   2   61.02    2.36
   3 -17   2  465.99   13.25
   3 -17   2  462.61   12.10
  -3 -17  -2  457.95   29.23
  -3 -17  -2  484.24   14.43
   3  17   2  469.80   13.72
   3  17   2  442.55   32.18
   5 -17   2   52.08    2.21
  -5 -17  -2   52.12    1.75
   5 -17   2   53.30    1.52
   5  17   2   51.12    1.91
  -7 -17  -2   20.67    1.00
  -7 -17  -2   18.97    1.12
   7 -17   2   19.64    1.24
  -7  17  -2   20.97    1.17
   7  17   2   18.79    0.94
  -9 -17  -2  175.62    6.18
   9 -17   2  177.26    8.56
  -9  17  -2  171.94    6.85
   9  17   2  164.59    8.20
 -11 -17  -2   38.38    1.96
  11 -17   2   37.43    2.54
  11  17   2   36.37    2.45
 -11  17  -2   41.22    2.22
 -13 -17  -2   12.91    1.35
  13 -17   2   12.82    1.61
 -13  17  -2   13.29    1.16
  13  17   2   14.33    1.31
  14 -18  -2   12.38    1.08
 -14 -18   2   10.95    0.93
 -14  18   2   11.69    1.12
  12 -18  -2    0.37    0.52
 -12 -18   2    0.41    0.61
  12  18  -2    1.01    0.44
 -12  18   2    0.01    0.28
  10 -18  -2    5.45    0.68
 -10 -18   2    7.45    0.74
  10  18  -2    7.27    0.68
 -10  18   2    7.61    0.81
  -8 -18   2   89.39    3.92
   8 -18  -2   94.18    4.11
  -8  18   2   97.87    5.43
   8  18  -2   93.58    3.72
   6 -18  -2   83.34   43.81
  -6 -18   2   51.60    1.49
  -6  18   2   50.21    2.01
   6  18  -2   52.17    2.04
  -6  18   2   53.20    9.86
   4 -18  -2    0.20    0.20
  -4 -18   2    0.06    0.22
   4 -18  -2    0.56    0.22
  -4  18   2    0.05    0.11
  -4  18   2    0.02    0.15
   4  18  -2    0.31    0.34
  -4  18   2    0.15    0.12
  -2 -18   2   68.02    3.31
   2 -18  -2   71.33    2.55
   2 -18  -2   71.74    2.47
  -2 -18   2   67.45    1.79
   2 -18  -2   69.96    2.78
  -2  18   2   69.35    2.87
  -2  18   2   71.21    2.40
   0 -18  -2  211.86    7.44
   0 -18  -2  200.17    5.70
   0 -18  -2  210.32    5.75
   0 -18   2  213.73    7.26
   0 -18   2  209.30    9.00
   0  18   2  209.23    9.26
  -2 -18  -2   40.78    1.64
   2 -18   2   41.47    1.48
   2 -18   2   40.38    1.77
  -2 -18  -2   40.50    1.83
   2  18   2   41.66    1.59
   2  18   2   40.36    1.41
   4 -18   2    2.02    0.35
  -4 -18  -2    1.91    0.33
  -4 -18  -2    1.78    0.26
   4  18   2    1.98    0.39
   6 -18   2   63.34    2.37
  -6 -18  -2   64.21    2.10
  -6  18  -2   66.73    2.37
   6  18   2   64.61    2.02
  -8 -18  -2   63.85    5.50
  -8 -18  -2   73.18    3.26
   8 -18   2   67.98    2.73
  -8  18  -2   69.37    3.56
   8  18   2   71.97    3.46
  10 -18   2    5.99    0.69
 -10 -18  -2    5.44    0.62
  10  18   2    5.66    0.54
 -10  18  -2    5.75    0.72
  12 -18   2    7.33    1.07
 -12 -18  -2    7.14    0.76
 -12  18  -2    9.04    0.78
  13 -19  -2   24.34    1.61
 -13 -19   2   25.07    1.62
  13  19  -2   26.81    1.98
 -13  19   2   25.57    2.48
 -11 -19   2    0.26    0.45
  11 -19  -2    1.10    0.54
  11  19  -2    1.02    0.55
   9 -19  -2   21.71    1.15
  -9 -19   2   20.61    1.15
   9  19  -2   19.08    1.24
  -9  19   2   18.25    0.99
  -7 -19   2    4.86    0.71
   7 -19  -2    3.85    0.65
   7  19  -2    4.09    0.66
  -7  19   2    4.27    0.44
  -5 -19   2    0.36    0.33
   5 -19  -2    0.11    0.18
  -5  19   2    0.26    0.15
  -5  19   2    0.42    0.13
   5  19  -2    0.34    0.31
  -5  19   2    0.21    0.14
   3 -19  -2   56.99    1.93
  -3 -19   2   57.26    2.14
   3 -19  -2   57.53    2.06
   3 -19  -2   58.43    2.00
   3  19  -2   66.19    2.94
  -3  19   2   57.65    2.32
  -3  19   2   57.41    2.02
   1 -19  -2   16.01    0.59
  -1 -19   2   15.06    0.91
   1 -19  -2   15.26    0.63
   1 -19  -2   15.98    0.83
  -1 -19   2   15.66    0.78
  -1  19   2   14.85    0.64
   1 -19   2   20.87    0.87
  -1 -19  -2   18.66    1.12
  -1 -19  -2   20.30    0.77
   1 -19   2   20.99    0.95
   1  19   2   18.88    1.20
   3 -19   2   94.15    3.28
   3 -19   2   98.97    2.81
  -3 -19  -2   95.96    4.46
  -3 -19  -2   99.42    2.35
   3  19   2   95.16    5.52
   3  19   2  100.34    4.35
   5 -19   2    1.96    0.35
   5 -19   2    1.38    0.64
  -5 -19  -2    2.27    0.34
   5  19   2    2.82    0.35
   7 -19   2    4.64    0.59
   7  19   2    3.95    0.57
  -7  19  -2    4.36    0.50
  -9 -19  -2   32.46    1.38
   9 -19   2   28.26    1.89
  -9  19  -2   31.93    1.91
   9  19   2   32.93    1.79
  11 -19   2    0.01    0.64
 -11 -19  -2   -0.85    0.63
  11  19   2   -0.56    0.38
 -11  19  -2    0.71    0.46
 -13 -19  -2    3.66    0.75
  13 -19   2    5.03    0.94
 -13  19  -2    4.80    0.89
  13  19   2    5.15    0.71
  14 -20  -2    1.49    0.55
 -14 -20   2    0.53    0.73
  14  20  -2    1.56    0.63
 -14  20   2    1.84    0.54
 -12 -20   2    3.46    0.77
  12 -20  -2    2.62    0.86
 -12  20   2    4.51    0.59
  12  20  -2    3.85    0.67
 -10 -20   2   -0.28    0.60
  10 -20  -2   -0.45    0.45
 -10  20   2    0.59    0.32
  10  20  -2    0.71    0.52
   8 -20  -2   12.26    1.09
  -8 -20   2   13.93    1.13
   8  20  -2   14.52    0.82
  -8  20   2   12.86    1.09
  -6 -20   2   11.46    0.64
   6 -20  -2   12.46    0.78
  -6  20   2   11.95    0.89
  -6  20   2   11.82    1.07
   6  20  -2   12.78    0.71
   4 -20  -2    6.11    0.57
   4 -20  -2    5.08    0.60
  -4 -20   2    5.07    0.57
  -4  20   2    5.30    0.75
  -4  20   2    4.71    0.30
  -4  20   2    5.21    0.48
   2 -20  -2   33.41    1.15
   2 -20  -2   35.75    1.31
   2 -20  -2   38.92    1.72
  -2 -20   2   37.38    3.54
  -2 -20   2   39.36   12.08
  -2  20   2   35.29    1.10
  -2  20   2   33.24    1.84
   0 -20  -2   14.34    0.57
   0 -20  -2   14.22    0.62
   0 -20  -2   13.37    0.59
   0 -20   2   13.63    0.58
   0 -20   2   12.78    0.55
   0  20   2   13.86    0.79
  -2 -20  -2   22.04    0.93
   2 -20   2   20.83    1.04
  -2 -20  -2   21.23    0.87
   2 -20   2   23.52    1.18
   2  20   2   21.20    0.71
   2  20   2   19.60    1.55
   4 -20   2   16.28    1.36
  -4 -20  -2   18.57    0.69
   4 -20   2   19.39    1.02
   4  20   2   17.00    0.81
   6 -20   2   20.94    0.99
  -6 -20  -2   20.00    1.17
   6 -20   2   21.63    1.07
   6  20   2   20.58    1.02
  -8 -20  -2   21.05    1.45
   8 -20   2   24.16    1.60
   8  20   2   22.20    1.49
  -8  20  -2   25.13    1.40
 -10 -20  -2    1.30    0.40
  10 -20   2    0.56    0.48
  10  20   2    1.31    0.46
 -12 -20  -2    2.72    0.80
  12 -20   2    2.18    0.73
  12  20   2    3.13    0.48
 -12  20  -2    3.73    0.77
 -13 -21   2    1.42    0.59
  13 -21  -2    1.86    0.48
  13  21  -2    1.48    0.71
  11 -21  -2    5.54    0.59
 -11 -21   2    6.55    0.83
  11  21  -2    4.92    0.69
   9 -21  -2   10.34    0.96
  -9 -21   2   11.31    1.08
  -9  21   2   12.44    0.75
  -7 -21   2    6.15    0.67
   7 -21  -2    8.09    0.73
  -7  21   2    7.54    0.63
   7  21  -2    7.33    0.62
   5 -21  -2    3.10    1.07
  -5 -21   2    2.87    1.51
   5 -21  -2   10.73   13.57
  -5  21   2    4.74    2.21
  -5  21   2    2.80    0.56
  -5  21   2    3.37    2.73
   5  21  -2    4.09    5.52
   3 -21  -2   14.14    0.66
  -3 -21   2   12.20    0.86
   3 -21  -2   14.95    0.70
   3 -21  -2   13.23    0.78
  -3  21   2   13.66    0.66
  -3  21   2   12.41    0.69
   1 -21  -2   15.04    0.54
   1 -21  -2   13.08    0.63
   1 -21  -2   13.37    0.80
  -1 -21   2   14.61    0.60
  -1 -21   2   12.36    0.75
  -1  21   2   12.76    0.63
  -1 -21  -2   19.08    0.66
  -1 -21  -2   18.47    0.84
  -1 -21  -2   18.32    1.24
   1 -21   2   19.03    1.00
   1 -21   2   18.54    0.97
   1  21   2   18.17    1.33
  -3 -21  -2    1.15    0.28
   3 -21   2    1.11    0.34
  -3 -21  -2    1.38    0.34
   5 -21   2    3.57    0.43
  -5 -21  -2    3.91    0.40
   5  21   2    4.41    0.37
  -7 -21  -2   10.82    0.74
   7 -21   2    9.79    0.94
   7  21   2    8.63    0.63
  -7  21  -2   10.00    0.73
  -9 -21  -2    1.40    0.59
   9 -21   2    0.62    0.65
  -9  21  -2    1.21    0.65
   9  21   2    1.30    0.38
  11 -21   2    3.27    0.48
 -11 -21  -2    3.13    0.66
  11  21   2    3.82    0.70
 -11  21  -2    3.06    0.69
 -13 -21  -2    1.38    0.70
  13 -21   2    1.46    0.78
 -13  21  -2    0.78    0.77
 -14 -22   2   76.52    7.14
  14 -22  -2   75.79    8.17
  14  22  -2   75.69    6.43
 -14  22   2   78.94    6.22
  12 -22  -2    2.38    0.48
  12  22  -2    1.84    0.66
 -12  22   2    1.59    0.40
  10 -22  -2    0.68    0.39
 -10 -22   2   -0.01    0.46
 -10  22   2    0.80    0.34
  10  22  -2    0.28    0.37
   8 -22  -2  237.56   14.72
  -8 -22   2  238.42    8.70
  -8  22   2  242.60   15.11
   8  22  -2  231.78    8.73
   6 -22  -2  105.68    7.36
  -6 -22   2  104.93    4.16
  -6  22   2  104.62    6.74
   6  22  -2  101.33    3.93
   4 -22  -2   29.98    2.06
   4 -22  -2   27.99    1.31
   4 -22  -2   30.35    1.82
  -4  22   2   28.47    2.41
  -4  22   2   30.89    1.18
   4  22  -2   50.91   13.15
   2 -22  -2  232.40    8.43
   2 -22  -2  234.15    8.56
   2 -22  -2  247.62    7.21
  -2 -22   2  235.47   10.82
  -2 -22   2  230.46    6.83
  -2  22   2  237.34   11.36
  -2  22   2  225.46   15.60
   0 -22  -2  206.22   10.68
   0 -22  -2  205.77    5.29
   0 -22   2  208.67    8.87
   0 -22  -2  198.37   14.72
   0 -22   2  211.36    6.67
   0  22   2  203.26   13.74
   2 -22   2  152.75    5.16
   2 -22   2  162.63    4.63
  -2 -22  -2  156.16    4.86
  -2 -22  -2  149.57    5.79
   2  22   2  154.40   14.32
   2  22   2  157.02    4.25
   4 -22   2  103.07    3.82
   4 -22   2  106.85    5.41
  -4 -22  -2  104.53    4.34
   4  22   2  104.42    3.89
   6 -22   2   35.54    1.64
  -6 -22  -2   39.22    2.05
   6 -22   2   35.22    1.59
  -6  22  -2   32.97    1.92
   6  22   2   35.51    1.65
  -8 -22  -2  213.70   10.98
   8 -22   2  209.73    9.72
   8  22   2  225.98   11.97
  -8  22  -2  213.80    9.73
 -10 -22  -2    0.97    0.43
  10 -22   2    0.58    0.67
  10  22   2    0.49    0.37
 -10  22  -2    0.03    0.67
  12 -22   2    7.04    1.01
 -12  22  -2    7.48    0.94
  13 -23  -2    2.53    0.59
 -13  23   2    2.32    0.47
  13  23  -2    3.13    0.74
  11 -23  -2   42.59    4.14
 -11 -23   2   44.48    2.98
  11  23  -2   45.94    3.07
 -11  23   2   49.36    3.10
  -9 -23   2    1.52    0.63
   9  23  -2    2.83    0.58
  -9  23   2    1.92    0.42
  -7 -23   2   -0.25    0.43
   7 -23  -2    0.11    0.27
   7  23  -2    0.76    0.51
  -7  23   2   -0.12    0.26
   5 -23  -2   47.84    2.02
   5 -23  -2   47.19    2.04
  -5 -23   2   51.44    1.86
  -5  23   2   45.83    4.46
  -5  23   2   44.62    2.67
   5  23  -2   46.31    1.76
  -5  23   2   44.84    6.15
  -3 -23   2   25.76    0.94
   3 -23  -2   24.36    0.91
  -3 -23   2   25.48    1.28
   3 -23  -2   25.92    1.56
   3 -23  -2   26.09    1.05
  -3  23   2   25.75    1.60
  -3  23   2   24.18    1.35
   1 -23  -2   72.27    2.18
   1 -23  -2   74.17    3.34
  -1 -23   2   71.82    2.58
  -1 -23   2   78.68    2.50
   1 -23  -2   69.20    3.94
  -1  23   2   71.85    3.82
   1 -23   2   76.71    3.40
  -1 -23  -2   78.27    2.88
   1 -23   2   74.49    3.08
  -1 -23  -2   81.17    2.54
  -1 -23  -2   76.15    3.48
   1  23   2   76.70    6.20
   3 -23   2   18.54    1.06
   3 -23   2   14.14    1.00
  -3 -23  -2   17.21    0.89
   3  23   2   17.43    1.07
   5 -23   2   46.74    1.69
  -5 -23  -2   53.27    1.91
   5 -23   2   45.87    1.82
   5  23   2   46.04    2.34
  -7 -23  -2    0.18    0.27
   7 -23   2    0.81    0.63
   7  23   2   -0.20    0.23
  -7  23  -2    0.02    0.43
  -9 -23  -2    7.50    0.87
   9 -23   2    7.55    0.94
  -9  23  -2    7.92    0.83
   9  23   2    7.04    1.03
  11 -23   2   28.66    2.65
 -11 -23  -2   28.68    2.37
  11  23   2   30.74    2.23
 -11  23  -2   26.87    1.79
  12 -24  -2    3.03    0.65
 -12 -24   2    3.12    0.59
 -12  24   2    3.57    0.52
 -10 -24   2    2.41    0.53
 -10  24   2    2.47    0.40
  10  24  -2    3.00    0.67
  -8 -24   2    0.40    0.44
   8 -24  -2    0.70    0.28
  -8  24   2    0.29    0.25
   8  24  -2   -0.48    0.44
   6 -24  -2    1.04    0.22
  -6 -24   2    0.44    0.45
   6  24  -2    1.70    1.10
   4 -24  -2    0.40    0.18
   4 -24  -2    0.43    0.32
  -4 -24   2    0.22    0.35
   4  24  -2    0.90    0.45
  -4  24   2    0.46    0.17
   2 -24  -2   10.50    0.59
   2 -24  -2   13.25    0.57
  -2 -24   2   13.25    1.00
  -2 -24   2   12.46    0.78
   2 -24  -2   12.15    0.77
  -2  24   2   10.23    0.73
  -2  24   2   12.15    0.63
   0 -24   2   12.07    0.83
   0 -24  -2   10.17    0.86
   0 -24  -2   12.02    0.70
   0 -24   2   11.25    0.66
   0 -24  -2   11.26    0.55
   0  24   2   10.96    0.68
   2 -24   2   10.11    0.88
  -2 -24  -2   11.18    0.57
   2 -24   2   11.15    0.83
  -2 -24  -2   10.07    0.82
   2  24   2   10.26    1.08
   4 -24   2   17.60    1.22
  -4 -24  -2   19.99    1.30
   4 -24   2   19.43    1.02
   4  24   2   20.58    1.01
   6 -24   2   15.66    1.06
   6 -24   2   12.58    1.04
  -6 -24  -2   13.58    1.03
   6  24   2   15.45    0.87
  -8 -24  -2    2.73    0.45
   8 -24   2    2.72    0.44
  -8  24  -2    2.20    0.65
   8  24   2    1.90    0.36
 -10 -24  -2    0.54    0.51
  10  24   2    0.47    0.32
 -10  24  -2    0.85    0.56
 -12 -24  -2    0.47    0.35
  12 -24   2    0.53    0.68
 -12  24  -2    0.96    0.50
 -13 -25   2   22.95    1.94
  13 -25  -2   16.13    2.46
 -13  25   2   19.82    2.12
  13  25  -2   21.02    1.99
  11 -25  -2    1.54    0.53
 -11 -25   2    2.47    0.58
 -11  25   2    2.60    0.54
  -9 -25   2   34.12    2.15
   9 -25  -2   34.23    3.28
   9  25  -2   35.97    1.43
  -9  25   2   33.51    2.38
   7 -25  -2   46.38    2.76
  -7 -25   2   44.89    2.25
  -7  25   2   43.89    3.53
   7  25  -2   46.62    2.47
   5 -25  -2    0.88    0.35
  -5 -25   2    0.68    0.40
   5  25  -2    0.92    0.56
   3 -25  -2   79.62    7.01
   3 -25  -2   86.10    5.26
   3 -25  -2   82.93    3.86
  -3 -25   2   88.72    3.35
  -3 -25   2   84.30    2.76
  -3  25   2   75.60    6.82
  -3  25   2   76.54    5.97
  -1 -25   2    1.56    0.28
  -1 -25   2    1.34    0.37
   1 -25  -2    1.27    0.18
   1 -25  -2    1.39    0.23
  -1  25   2    1.07    0.19
   1 -25   2   -0.33    0.38
  -1 -25  -2    0.35    0.20
  -1 -25  -2    0.26    0.20
  -1 -25  -2    0.22    0.15
   1 -25   2   -0.10    0.36
   3 -25   2   56.07    1.54
  -3 -25  -2   55.85    1.88
   3 -25   2   56.55    2.46
   3  25   2   55.48    2.53
   5 -25   2    0.48    0.36
   5 -25   2    0.73    0.35
   5  25   2    0.39    0.29
   7 -25   2   14.70    1.16
  -7 -25  -2   14.18    0.95
  -7  25  -2   13.60    0.95
   7  25   2   14.77    1.30
  -9 -25  -2   28.41    1.25
   9 -25   2   31.14    2.36
  -9  25  -2   29.68    3.03
   9  25   2   28.68    1.79
 -11 -25  -2    0.91    0.60
  11 -25   2    0.06    0.48
 -11  25  -2    0.41    0.38
  12 -26  -2    3.28    0.48
 -12 -26   2    2.47    0.61
 -12  26   2    3.54    0.49
  12  26  -2    2.51    0.82
 -10 -26   2    5.81    0.94
  10 -26  -2    5.67    0.73
  10  26  -2    4.86    0.55
 -10  26   2    5.39    0.70
  -8 -26   2    5.99    0.85
   8 -26  -2    4.92    0.53
  -8  26   2    8.16    0.99
   6 -26  -2    5.77    0.48
  -6 -26   2    5.36    0.72
   6  26  -2    5.12    0.62
  -6  26   2    4.37    0.53
   4 -26  -2    3.67    0.45
  -4 -26   2    4.07    0.55
   4 -26  -2    4.66    0.52
  -4  26   2    3.76    0.42
  -2 -26   2   17.99    1.38
  -2 -26   2   19.24    0.82
   2 -26  -2   18.34    0.83
   2 -26  -2   17.78    1.82
   2 -26  -2   18.49    0.72
  -2  26   2   18.77    1.11
  -2  26   2   18.10    1.42
   0 -26   2   -0.28    0.26
   0 -26   2    0.29    0.42
   0 -26  -2    0.31    0.26
   0 -26  -2    0.14    0.14
   0 -26  -2   -0.02    0.18
  -2 -26  -2   37.01    2.35
   2 -26   2   33.88    1.97
   2 -26   2   36.87    1.23
  -2 -26  -2   35.48    1.65
  -4 -26  -2    5.44    0.50
   4 -26   2    5.99    0.77
   4 -26   2    6.95    0.77
   4  26   2    4.52    0.44
   6 -26   2   21.46    1.31
   6 -26   2   21.30    1.41
  -6 -26  -2   22.64    1.00
   6  26   2   22.25    1.78
   8 -26   2    3.09    0.61
  -8 -26  -2    1.73    0.33
  -8  26  -2    2.60    0.59
   8  26   2    2.42    0.39
  10 -26   2    6.21    1.01
 -10 -26  -2    5.02    0.67
 -10  26  -2    6.01    0.74
  10  26   2    4.94    0.98
  11 -27  -2   33.31    2.90
 -11 -27   2   33.99    2.14
 -11  27   2   32.33    3.77
  11  27  -2   37.60    2.78
   9 -27  -2   52.80    5.14
  -9 -27   2   52.39    3.13
   9  27  -2   57.00    3.83
  -9  27   2   55.19    5.44
  -7 -27   2   23.94    1.17
   7 -27  -2   21.15    1.41
  -7  27   2   21.17    2.24
   7  27  -2   19.73    1.54
   5 -27  -2   47.85    3.21
  -5 -27   2   48.89    2.00
   5 -27  -2   47.00    2.48
   5  27  -2   49.15    2.15
  -5  27   2   48.12    2.51
  -3 -27   2  268.61   12.96
   3 -27  -2  255.61   16.84
  -3 -27   2  255.61    8.78
   3 -27  -2  247.84   13.18
  -3  27   2  244.54   18.41
   1 -27  -2    0.89    0.26
   1 -27  -2    0.52    0.27
  -1 -27   2    0.67    0.31
  -1 -27   2    0.47    0.30
   1 -27   2   10.67    0.80
  -1 -27  -2   12.84    0.62
  -1 -27  -2   11.22    0.76
   1 -27   2   12.50    0.74
  -3 -27  -2  229.67   10.81
   3 -27   2  231.54    7.53
   3 -27   2  222.59    8.71
   3  27   2  230.86   13.74
  -5 -27  -2   70.69    2.80
   5 -27   2   69.93    3.65
   5 -27   2   67.71    2.50
   5  27   2   63.23    3.04
  -7 -27  -2   -0.13    0.26
   7 -27   2   -0.24    0.33
  -7  27  -2   -0.44    0.48
   7  27   2    0.43    0.42
   9 -27   2   55.73    2.94
  -9 -27  -2   60.28    3.09
   9  27   2   52.74    4.63
  -9  27  -2   54.85    4.13
  11 -27   2   18.54    1.73
 -11 -27  -2   20.52    1.57
  11  27   2   17.68    1.51
 -11  27  -2   19.42    2.19
  12  28  -2    5.69    0.80
 -10 -28   2   10.82    1.03
  10 -28  -2   10.42    1.03
  10  28  -2   13.01    0.87
 -10  28   2    9.80    1.44
   8 -28  -2   -0.04    0.30
  -8 -28   2    0.81    0.48
   8  28  -2   -0.36    0.63
  -8  28   2    0.82    0.30
   6 -28  -2   58.17    2.93
  -6 -28   2   56.14    2.38
   6 -28  -2   54.90    3.62
  -6  28   2   54.34    5.97
   6  28  -2   58.07    2.64
  -4 -28   2   12.01    0.88
   4 -28  -2   11.10    0.84
   4 -28  -2   11.79    1.55
  -4 -28   2   10.69    0.79
  -4  28   2   10.66    0.94
  -2 -28   2    2.95    0.46
   2 -28  -2    2.56    0.37
  -2 -28   2    2.61    0.56
   2 -28  -2    3.16    0.40
  -2  28   2    2.90    0.39
   0 -28  -2   76.92    3.97
   0 -28   2   74.16    2.66
   0 -28   2   71.44    2.98
   0 -28  -2   74.63    3.83
  -2 -28  -2    0.27    0.23
   2 -28   2    0.58    0.41
   2 -28   2    1.49    0.51
  -4 -28  -2    5.51    0.55
   4 -28   2    5.72    0.55
   4 -28   2    4.65    0.74
   4  28   2    5.06    0.57
   6 -28   2   31.25    1.51
  -6 -28  -2   31.55    1.62
   6 -28   2   29.89    1.97
  -6  28  -2   31.63    1.90
   6  28   2   28.90    1.56
   8 -28   2    0.16    0.40
  -8 -28  -2    0.10    0.27
  -8  28  -2    0.20    0.43
 -10 -28  -2   13.58    1.36
  10 -28   2   11.62    1.04
  10  28   2   12.49    1.24
 -10  28  -2   13.62    1.51
 -11 -29   2    1.90    0.56
  11  29  -2    2.30    0.85
   9 -29  -2    4.54    0.78
  -9 -29   2    3.79    0.76
   9  29  -2    4.02    0.68
  -7 -29   2    0.30    0.52
   7 -29  -2    0.24    0.36
  -7  29   2    0.10    0.27
   7  29  -2    0.17    0.37
  -5 -29   2   17.66    1.32
   5 -29  -2   14.42    0.87
   5 -29  -2   15.64    1.03
  -5  29   2   13.86    0.82
  -3 -29   2   17.49    1.13
  -3 -29   2   16.04    1.12
   3 -29  -2   16.40    0.97
   3 -29  -2   15.19    1.12
  -3  29   2   16.01    1.00
   1 -29  -2    2.74    0.39
  -1 -29   2    2.05    0.33
   1 -29  -2    2.11    0.40
   1 -29   2    7.41    0.56
  -1 -29  -2    6.56    0.46
  -1 -29  -2    5.20    0.53
   1 -29   2    5.23    0.66
  -3 -29  -2   29.57    2.13
   3 -29   2   30.95    1.67
  -3 -29  -2   30.40    1.76
   3 -29   2   29.30    1.55
   5 -29   2    1.27    0.46
  -5 -29  -2    0.61    0.29
   5 -29   2    0.17    0.36
   5  29   2    0.90    0.32
   7 -29   2    3.39    0.65
  -7 -29  -2    3.61    0.59
   7  29   2    3.50    0.45
  -7  29  -2    4.03    0.78
  -9 -29  -2    5.50    0.68
   9 -29   2    7.26    0.95
   9  29   2    4.78    0.69
  -9  29  -2    5.90    0.85
 -10 -30   2    1.75    0.47
  10  30  -2    2.12    0.52
  -8 -30   2   79.81    4.22
   8 -30  -2   82.49    3.75
   8  30  -2   77.85    4.95
  -6 -30   2    0.49    0.53
   6 -30  -2    0.36    0.35
   6 -30  -2    0.59    0.31
  -6  30   2    0.86    0.22
   6  30  -2    1.35    0.39
  -4 -30   2   10.39    1.02
  -4 -30   2    9.87    0.91
   4 -30  -2    9.56    0.61
   4 -30  -2    8.66    0.69
  -4  30   2    9.55    1.23
  -2 -30   2   97.86    5.97
   2 -30  -2   94.59    5.61
  -2 -30   2  100.25    3.93
   2 -30  -2  102.57    5.60
  -2  30   2   93.72    8.51
   0 -30   2   29.93    1.63
   0 -30  -2   30.89    1.85
   0 -30   2   27.93    1.52
   0 -30  -2   27.83    1.85
  -2 -30  -2   62.34    2.19
   2 -30   2   62.40    2.02
   2 -30   2   62.59    2.60
  -2 -30  -2   61.86    4.51
  -4 -30  -2   10.89    0.75
   4 -30   2   11.87    0.95
   4 -30   2   11.06    0.97
   4  30   2   10.86    0.84
   6 -30   2   16.41    1.13
  -6 -30  -2   14.81    1.00
   6 -30   2   15.50    1.19
   6  30   2   16.07    0.88
   8 -30   2   57.43    4.20
  -8 -30  -2   62.01    5.23
  -8  30  -2   61.14    3.87
   8  30   2   52.45    4.11
  10 -30   2   -0.27    0.47
 -10 -30  -2   -0.18    0.54
  10  30   2   -0.26    0.33
 -10  30  -2   -0.57    0.43
 -11 -31   2    1.00    0.53
  11  31  -2    0.04    0.56
  -9 -31   2   26.70    1.93
   9  31  -2   26.84    1.98
  -7 -31   2    1.82    1.46
  -5 -31   2    0.95    0.48
   5 -31  -2    1.81    0.40
  -5 -31   2    1.44    0.49
   5 -31  -2    1.73    0.37
   3 -31  -2   33.21    1.79
  -3 -31   2   31.34    1.98
  -3 -31   2   35.98    2.10
   3 -31  -2   33.36    2.37
  -3  31   2   29.64    3.61
   1 -31  -2    2.49    0.26
   1 -31  -2    3.18    0.41
  -1 -31   2    2.96    0.50
  -1 -31   2    3.49    0.51
  -1 -31  -2    3.80    0.43
   1 -31   2    3.06    0.61
   1 -31   2    3.68    0.47
  -3 -31  -2   34.49    2.04
   3 -31   2   34.42    1.51
  -3 -31  -2   36.00    2.69
   3 -31   2   34.95    1.68
   5 -31   2   12.52    1.02
  -5 -31  -2   12.55    0.98
   5 -31   2   12.34    1.01
   5  31   2   10.06    1.04
   7 -31   2    0.01    0.47
  -7 -31  -2    0.94    0.38
  -7  31  -2    0.86    0.61
   7  31   2    0.58    0.26
  -9 -31  -2   14.73    1.37
   9 -31   2   18.71    1.55
   9  31   2   16.95    1.42
  -9  31  -2   15.15    1.72
 -10 -32   2    0.67    0.58
  10  32  -2    1.07    0.46
  -8 -32   2   28.26    1.88
   8  32  -2   35.19    1.84
   6 -32  -2   36.92    1.85
  -6 -32   2   31.10    1.62
   6 -32  -2   33.78    2.50
   4 -32  -2    4.13    0.59
  -4 -32   2    5.95    0.79
  -4 -32   2    4.44    0.46
   4 -32  -2    4.29    0.53
   2 -32  -2   31.38    2.94
  -2 -32   2   29.39    1.49
  -2 -32   2   31.05    1.64
   2 -32  -2   31.63    1.56
   0 -32  -2   37.19    3.55
   0 -32   2   34.98    1.80
   0 -32   2   35.48    1.49
   0 -32  -2   36.13    1.68
  -2 -32  -2   28.97    1.53
  -2 -32  -2   25.77    2.83
   2 -32   2   24.58    1.51
   2 -32   2   26.92    1.37
  -4 -32  -2    7.43    0.83
   4 -32   2    7.96    0.82
  -4 -32  -2    7.88    0.67
   4 -32   2    5.82    0.73
   6 -32   2   34.33    2.76
  -6 -32  -2   33.63    1.49
   6 -32   2   31.59    2.17
   6  32   2   30.90    1.81
  -6  32  -2   33.99    2.65
   8 -32   2   16.70    2.27
  -8 -32  -2   17.57    1.69
  -8  32  -2   16.36    2.01
   8  32   2   14.50    1.39
  -7 -33   2    9.52    1.07
  -5 -33   2   12.73    1.11
   5 -33  -2   12.82    0.96
  -5 -33   2   14.55    0.97
   3 -33  -2    1.57    0.30
  -3 -33   2    1.05    0.48
   3 -33  -2    0.92    0.38
  -3 -33   2    1.63    0.42
  -1 -33   2   31.07    1.78
   1 -33  -2   28.24    1.74
  -1 -33   2   31.24    1.66
   1 -33  -2   29.96    2.62
  -1 -33  -2   17.60    1.56
   1 -33   2   18.70    1.50
  -1 -33  -2   15.71    1.59
   1 -33   2   15.72    0.97
  -3 -33  -2    0.11    0.29
  -3 -33  -2    0.77    0.40
   3 -33   2    0.48    0.48
   3 -33   2    0.34    0.51
   5 -33   2    7.55    0.98
  -5 -33  -2    8.94    0.91
   5 -33   2    9.03    0.87
   7 -33   2    5.11    0.63
   7  33   2    5.44    0.72
  -8 -34   2   38.16    2.05
   8  34  -2   37.08    3.32
   6 -34  -2    6.14    0.87
  -6 -34   2    6.79    0.67
  -6 -34   2    6.38    0.94
  -4 -34   2   19.68    1.36
   4 -34  -2   15.11    1.09
  -4 -34   2   15.34    1.25
   2 -34  -2   33.47    2.76
  -2 -34   2   39.26    2.56
  -2 -34   2   34.03    2.47
   0 -34   2   11.35    1.01
   0 -34   2   13.55    1.28
   0 -34  -2   13.81    1.51
   0 -34  -2   13.92    1.11
  -2 -34  -2   21.86    1.63
   2 -34   2   23.03    1.93
   2 -34   2   21.98    1.85
  -2 -34  -2   22.10    1.60
   4 -34   2   14.72    1.26
   4 -34   2   15.19    1.38
  -4 -34  -2   11.25    1.28
  -4 -34  -2   14.60    1.15
   6 -34   2    5.19    0.99
  -6 -34  -2    4.54    0.78
   6 -34   2    7.28    0.77
   6  34   2    6.29    0.68
  -6  34  -2    6.59    1.28
  -8 -34  -2   24.96    2.61
   8 -34   2   24.64    2.45
   8  34   2   22.30    2.48
  -8  34  -2   25.13    2.87
  -7 -35   2    7.08    1.01
   5 -35  -2   21.81    1.61
  -5 -35   2   22.63    2.12
  -5 -35   2   25.69    1.69
  -3 -35   2   60.27    4.08
  -3 -35   2   62.42    3.79
   3 -35  -2   61.42    4.87
  -1 -35   2    0.21    0.57
  -1 -35   2   -0.01    0.55
   1 -35  -2    0.02    0.30
   1 -35   2    1.25    0.42
   1 -35   2    2.73    0.59
  -1 -35  -2    1.96    0.41
   3 -35   2   58.16    2.76
  -3 -35  -2   55.60    4.62
   3 -35   2   57.41    4.13
   5 -35   2   16.86    1.56
   5 -35   2   17.35    1.71
  -5 -35  -2   15.78    1.21
   7 -35   2    1.99    0.64
  -7 -35  -2    2.20    0.41
  -7  35  -2    2.67    0.79
   7  35   2    2.67    0.69
  -8 -36   2   10.58    1.30
   6 -36  -2   -0.24    0.35
  -6 -36   2   -0.52    0.42
  -6 -36   2    0.29    0.34
   4 -36  -2    5.13    0.69
  -4 -36   2    4.83    0.67
  -4 -36   2    4.83    0.83
  -2 -36   2   15.93    1.32
  -2 -36   2   13.53    1.06
   2 -36  -2   14.05    1.56
   0 -36   2    0.16    0.37
   0 -36   2   -0.31    0.41
  -2 -36  -2    9.28    0.86
   2 -36   2   10.97    0.83
   4 -36   2   11.69    1.41
  -4 -36  -2   10.94    1.19
   4 -36   2   12.45    1.51
   6 -36   2   -0.60    0.35
  -6 -36  -2    0.20    0.26
   6 -36   2    0.21    0.35
  -6  36  -2   -0.75    0.61
  -7 -37   2    2.30    0.68
  -7 -37   2    1.09    0.40
  -5 -37   2   16.83    1.42
  -5 -37   2   17.11    1.94
   3 -37  -2    0.48    0.38
  -3 -37   2    0.88    0.53
  -3 -37   2    0.63    0.57
   1 -37  -2    4.97    0.56
  -1 -37   2    5.75    0.74
  -1 -37   2    4.40    0.75
   1 -37   2    6.32    0.81
   1 -37   2    6.47    1.00
  -1 -37  -2    5.97    0.67
  -3 -37  -2    3.46    0.40
   3 -37   2    3.66    0.75
   3 -37   2    2.63    0.52
   5 -37   2   13.05    1.30
   5 -37   2   11.44    1.38
  -5 -37  -2    9.72    1.26
  -6 -38   2    6.69    0.81
  -6 -38   2    5.97    0.84
  -4 -38   2    0.78    0.63
  -4 -38   2    0.20    0.38
  -2 -38   2    0.28    0.37
  -2 -38   2    1.29    0.38
   0 -38  -2    5.35    0.56
   0 -38   2    5.60    0.75
   0 -38   2    5.54    0.76
  -2 -38  -2    0.62    0.25
   2 -38   2    0.58    0.43
   2 -38   2    0.71    0.47
  -4 -38  -2    2.06    0.65
   4 -38   2    1.19    0.40
   4 -38   2    0.65    0.52
  -5 -39   2    4.27    0.71
  -5 -39   2    5.71    0.88
  -3 -39   2   72.05    3.49
  -3 -39   2   76.71    6.19
  -1 -39   2   -0.47    0.41
  -1 -39   2    0.37    0.34
   1 -39   2    1.41    0.53
   3 -39   2   72.95    6.28
   3 -39   2   74.00    5.98
  -2 -40   2    4.97    0.74
  -2 -40   2    3.90    0.67
   0 -40   2   60.68    3.34
   0 -40   2   63.58    4.48
   2 -40   2    3.11    0.79
   2 -40   2    3.11    0.78
  16   0  -3   -0.16    0.37
 -16   0   3    0.35    0.48
 -14   0   3   -0.11    0.59
  14   0  -3    1.89    0.65
 -12   0   3    1.36    0.58
 -10   0   3   -0.03    0.33
  10   0  -3    0.99    0.36
  -8   0   3    0.53    0.26
   8   0  -3    0.86    0.36
  -8   0   3    0.23    0.23
  -6   0   3    0.02    0.13
   6   0  -3   -0.01    0.15
  -6   0   3    0.36    0.28
  -6   0   3   -0.34    0.29
   4   0  -3   -0.06    0.16
  -4   0   3   -0.16    0.17
  -4   0   3   -0.50    0.18
  -4   0   3   -0.06    0.13
   4   0  -3    0.01    0.15
   2   0  -3    0.25    0.07
  -2   0   3    0.14    0.13
   0   0   3   -0.16    0.15
   0   0  -3   -0.02    0.08
   0   0  -3    0.13    0.12
   0   0   3    0.17    0.17
  -2   0  -3   -0.14    0.15
  -2   0  -3    0.03    0.17
   4   0   3    0.38    0.33
  -4   0  -3    0.20    0.42
  -6   0  -3    0.16    0.22
   6   0   3   -0.30    0.33
   8   0   3    0.23    0.39
   8   0   3    0.52    0.25
  -8   0  -3   -0.01    0.39
  10   0   3    0.38    0.37
 -10   0  -3   -0.93    0.64
  10   0   3    0.25    0.16
 -12   0  -3    0.59    0.77
  12   0   3    1.24    0.71
  14   0   3    0.60    0.55
 -15  -1   3   46.89    2.80
  15  -1  -3   40.82    4.67
 -15   1   3   49.36    3.36
  15   1  -3   41.14    3.90
 -13  -1   3    6.54    0.78
  13  -1  -3    5.89    0.66
 -13   1   3    6.20    0.74
  13   1  -3    5.90    0.77
  11  -1  -3   11.40    0.77
 -11  -1   3   11.41    1.04
  11   1  -3    9.99    0.69
 -11   1   3    9.93    0.69
  -9  -1   3  187.22    7.91
   9  -1  -3  195.27    6.93
  -9  -1   3  206.73    8.39
   9   1  -3  215.59    7.49
  -9   1   3  198.80    6.19
   7  -1  -3   79.25    2.34
  -7  -1   3   76.49    2.77
  -7  -1   3   79.56    2.22
  -7   1   3   76.95    5.57
  -7   1   3   79.53    2.72
   7   1  -3   73.56    2.65
  -7   1   3   80.12    2.62
  -5  -1   3  123.26    3.63
   5  -1  -3  121.35    5.45
  -5  -1   3  123.67    5.38
   5  -1  -3  124.36    5.25
  -5  -1   3  124.74    3.98
  -5   1   3  129.70    4.71
   5   1  -3  122.77    4.89
  -5   1   3  128.38    5.10
  -5   1   3  125.29    3.11
   3  -1  -3  102.43    4.69
  -3  -1   3  100.27    4.81
   3  -1  -3   98.38    4.01
  -3  -1   3  102.87    3.87
   3   1  -3   99.74    4.33
  -3   1   3  103.42    3.24
  -3   1   3  103.06    4.11
  -3   1   3  104.89    4.33
   3   1  -3   97.91    4.07
  -1  -1   3  158.10    7.40
  -1  -1   3  161.51    6.87
   1  -1  -3  159.84    7.36
  -1  -1   3  157.82    6.64
   1   1  -3  159.71    7.76
  -1   1   3  162.85    6.59
  -1   1   3  163.88    9.94
  -1   1   3  156.97    5.74
  -1  -1  -3  415.94   16.79
  -1  -1  -3  426.03   12.71
   1  -1   3  412.92   14.16
  -1   1  -3  417.41   14.73
   1   1   3  429.03   17.03
  -1   1  -3  424.50   15.01
  -3  -1  -3   -0.01    0.14
  -3  -1  -3   -0.04    0.19
   3  -1   3    0.11    0.20
  -3   1  -3   -0.17    0.15
   3   1   3   -0.07    0.31
  -5  -1  -3   51.83    2.52
   5  -1   3   50.23    2.23
  -5   1  -3   48.01    2.30
   5   1   3   54.18    1.84
   7  -1   3  360.44   14.24
  -7  -1  -3  349.08   14.89
  -7   1  -3  327.29   11.45
   7   1   3  365.17   10.54
   7   1   3  359.52   12.55
  -9  -1  -3    1.33    0.57
   9  -1   3    2.08    0.29
  -9   1  -3    2.88    0.51
   9   1   3    2.38    0.30
   9   1   3    2.36    0.36
  11  -1   3    2.38    0.70
 -11  -1  -3    3.16    0.52
 -11   1  -3    2.58    0.76
  11   1   3    3.36    0.51
 -13  -1  -3   42.25    2.57
  13  -1   3   38.42    2.90
 -13   1  -3   42.07    2.04
  13   1   3   41.62    2.50
  16  -2  -3    1.60    0.51
  16   2  -3    0.79    0.52
 -16   2   3    1.66    0.62
 -14  -2   3    8.47    0.93
  14  -2  -3    9.18    1.00
  14   2  -3    8.93    0.99
 -14   2   3    8.08    0.75
 -12  -2   3   20.49    1.11
  12  -2  -3   21.42    1.47
  12   2  -3   19.26    1.26
 -12   2   3   25.12    1.31
 -10  -2   3    1.14    0.83
  10  -2  -3    3.17    7.14
 -10   2   3    1.71    0.54
  10   2  -3    1.28    0.43
   8  -2  -3   43.38    1.33
  -8  -2   3   44.51    1.31
  -8  -2   3   40.44    1.81
   8   2  -3   46.18    2.00
  -8   2   3   44.21    1.48
  -6  -2   3   32.75    1.18
  -6  -2   3   33.80    1.52
  -6  -2   3   34.22    1.49
   6  -2  -3   37.35    1.63
  -6   2   3   35.32    1.55
  -6   2   3   35.70    1.68
   6   2  -3   36.52    1.45
  -6   2   3   35.69    1.13
   4  -2  -3    0.91    0.16
  -4  -2   3    1.27    0.34
   4  -2  -3    1.11    0.19
  -4   2   3    1.00    0.26
   4   2  -3    0.62    0.20
  -4   2   3    0.96    0.20
  -2  -2   3  110.61    3.71
   2  -2  -3  107.15    5.15
  -2  -2   3  105.59    3.62
  -2   2   3  114.30    6.22
   2   2  -3  105.28    5.63
  -2   2   3  111.33    4.62
  -2   2   3  107.30    3.67
  -2   2   3  108.30    3.61
   0  -2   3    3.35    0.26
   0  -2   3    3.54    0.29
   0  -2  -3    2.97    0.14
   0  -2  -3    3.10    0.20
   0   2   3    3.13    0.22
   0   2   3    3.71    0.36
   0   2  -3    3.17    0.26
   0   2  -3    3.43    0.26
   2  -2   3    4.34    0.46
  -2  -2  -3    4.93    0.31
  -2  -2  -3    4.65    0.30
   2   2   3    4.80    0.33
  -4  -2  -3   97.56    5.35
   4  -2   3   94.55    3.66
  -4  -2  -3   99.71    5.46
   4   2   3  100.80    4.45
   4   2   3  104.75    4.00
  -4   2  -3   92.21    4.10
  -4   2  -3  101.74    5.06
   6  -2   3   13.10    0.74
  -6  -2  -3    9.50    0.73
  -6   2  -3   11.55    0.72
   6   2   3   11.68    0.50
   6   2   3   12.47    0.73
  -8  -2  -3    1.57    0.38
   8  -2   3    1.61    0.47
   8   2   3    0.98    0.49
   8   2   3    1.69    0.33
  -8   2  -3    1.76    0.53
  10  -2   3   24.74    1.65
  10  -2   3   26.58    2.78
 -10  -2  -3   27.88    1.72
  10   2   3   29.46    1.37
 -10   2  -3   28.35    1.74
  10   2   3   25.54    2.05
 -12  -2  -3    1.83    0.56
  12  -2   3    0.51    0.49
 -12   2  -3    0.37    0.76
  12   2   3    1.13    0.45
  14  -2   3   -0.07    0.41
 -14  -2  -3    1.40    0.58
  14   2   3    0.02    0.46
 -14   2  -3    1.07    0.61
 -15  -3   3   11.69    0.84
  15  -3  -3   10.39    1.25
  15   3  -3   11.37    1.06
 -15   3   3   10.32    1.11
  13  -3  -3   24.07    1.97
 -13  -3   3   24.08    1.59
 -13   3   3   20.38    1.58
  13   3  -3   20.84    1.21
  11  -3  -3    0.13    0.34
 -11  -3   3   -0.08    0.43
 -11   3   3    0.82    0.38
  11   3  -3    0.67    0.45
  -9  -3   3    8.45    0.48
   9  -3  -3    6.94    0.56
  -9  -3   3    7.82    0.63
  -9   3   3    6.73    0.51
  -7  -3   3  159.56    4.58
  -7  -3   3  154.65    5.02
   7  -3  -3  152.21    4.38
  -7   3   3  151.76    4.45
  -7   3   3  149.30    8.58
   7   3  -3  152.17    6.71
  -7   3   3  154.34    5.16
   5  -3  -3   70.68    3.15
  -5  -3   3   70.95    2.66
  -5  -3   3   67.76    3.01
   5  -3  -3   67.08    1.83
  -5   3   3   67.13    2.11
   5   3  -3   70.94    3.43
  -5   3   3   69.29    2.29
  -5   3   3   67.76    2.16
  -3  -3   3   61.03    2.13
   3  -3  -3   58.27    3.01
  -3  -3   3   59.54    2.28
   3  -3  -3   56.16    2.50
  -3   3   3   58.36    1.99
   3   3  -3   63.85    2.68
  -3   3   3   58.67    2.58
   3   3  -3   56.48    2.48
  -3   3   3   56.98    2.27
  -1  -3   3   85.14    3.75
  -1  -3   3   86.94    2.97
   1  -3  -3   83.24    3.08
  -1  -3   3   86.22    3.10
  -1   3   3   84.20    3.28
   1   3  -3   86.49    4.00
  -1   3   3   87.87    3.91
  -1   3   3   85.51    3.83
   1  -3   3   63.06    2.81
  -1  -3  -3   59.56    2.28
  -1  -3  -3   58.70    2.08
   1  -3   3   63.99    2.12
  -1   3  -3   58.92    2.55
  -1   3  -3   64.73    1.99
   1   3   3   58.73    2.08
   1   3   3   60.06    2.26
  -3  -3  -3   21.00    0.88
  -3  -3  -3   22.16    1.04
   3  -3   3   22.45    1.02
   3   3   3   22.09    1.06
   3   3   3   22.65    0.89
  -3   3  -3   19.42    0.97
   5  -3   3   79.29    2.43
  -5  -3  -3  100.54   60.37
  -5  -3  -3  128.72   59.17
  -5   3  -3   79.52    3.94
   5   3   3  153.07  104.08
   5   3   3   87.16   18.81
   7  -3   3   21.94    0.95
  -7  -3  -3   17.83    0.95
   7   3   3   18.45    1.24
   7   3   3   17.99    0.96
  -7   3  -3   20.76    1.05
  -9  -3  -3   40.43    1.81
   9  -3   3   43.28    2.11
   9   3   3   41.61    2.24
   9   3   3   42.65    2.17
  -9   3  -3   43.52    2.33
  11  -3   3   10.69    1.01
 -11  -3  -3    9.76    0.93
 -11   3  -3    8.10    0.70
  11   3   3   11.47    0.91
 -13  -3  -3   12.70    1.11
  13  -3   3   11.55    1.29
  13   3   3   12.15    1.17
 -13   3  -3   14.39    1.31
 -16  -4   3   19.38    1.98
  16  -4  -3   20.56    2.46
 -16   4   3   16.92    2.20
  16   4  -3   14.96    1.69
  14  -4  -3   26.21    2.27
 -14  -4   3   33.45    1.75
 -14   4   3   28.34    2.45
  14   4  -3   29.78    2.43
 -12  -4   3   28.09    1.56
  12  -4  -3   29.98    1.87
  12   4  -3   27.90    1.79
 -12   4   3   30.62    1.40
  10  -4  -3  264.99   10.42
 -10  -4   3  261.98   15.50
 -10  -4   3  278.08    6.60
  10   4  -3  273.43    7.23
 -10   4   3  267.23   10.14
  -8  -4   3    0.78    0.26
  -8  -4   3    0.74    0.31
  -6  -4   3   45.74    1.59
   6  -4  -3   45.00    2.23
  -6  -4   3   41.18    2.47
  -6   4   3   43.77    1.40
   6   4  -3   45.79    1.77
  -6   4   3   43.99    1.78
  -6   4   3   44.02    1.34
   4  -4  -3  813.45   33.48
  -4  -4   3  820.11   37.14
  -4  -4   3  823.85   35.81
  -4   4   3  812.44   38.48
   4   4  -3  838.72   38.63
  -4   4   3  829.92   41.56
   2  -4  -3   35.90    1.63
  -2  -4   3   40.12    1.23
  -2  -4   3   39.29    1.58
  -2   4   3   36.27    1.40
  -2   4   3   38.42    1.32
  -2   4   3   37.86    1.73
   2   4  -3   38.88    1.75
   0  -4  -3   27.90    0.88
   0  -4  -3   28.96    1.23
   0  -4   3   29.37    1.11
   0  -4   3   27.76    0.92
   0   4   3   28.87    1.04
   0   4  -3   28.44    1.08
   0   4  -3   25.91    1.53
   0   4   3   28.95    1.48
   2  -4   3  565.04   18.51
  -2  -4  -3  566.72   17.62
  -2  -4  -3  535.01   19.02
   2   4   3  541.71   28.54
   2   4   3  575.00   24.81
  -2   4  -3  542.55   21.85
  -4  -4  -3  159.49    6.43
  -4  -4  -3  169.37    9.10
   4  -4   3  164.19    5.01
   4   4   3  165.91    6.80
   4   4   3  173.35    7.08
   6  -4   3   77.76    3.45
  -6  -4  -3   77.09    2.55
  -6   4  -3   74.96    3.17
   6   4   3   82.55    2.68
   6   4   3   76.71    2.51
  -8  -4  -3   67.30    3.26
   8  -4   3   69.65    2.20
   8   4   3   65.08    4.61
   8   4   3   66.68    2.74
  -8   4  -3   66.10    3.66
  10  -4   3   64.30    3.83
 -10  -4  -3   63.42    2.79
  10   4   3   69.96    2.59
 -10   4  -3   66.36    3.73
  12  -4   3   79.77    5.81
 -12  -4  -3   84.47    4.98
 -12   4  -3   79.56    5.16
  12   4   3   90.50    4.71
  14  -4   3    2.66    0.81
 -14   4  -3    2.48    0.63
  14   4   3    3.26    0.92
 -15  -5   3    2.56    0.60
  15  -5  -3    3.77    0.79
 -15   5   3    2.42    0.59
  13  -5  -3    1.76    0.53
  13   5  -3    0.90    0.48
  11  -5  -3    0.63    0.48
 -11  -5   3    0.60    0.47
  11   5  -3    0.75    0.40
 -11   5   3    1.32    0.39
   9  -5  -3    8.03    0.62
  -9  -5   3    7.35    0.61
  -9  -5   3    7.75    0.50
  -9   5   3    6.48    0.73
   9   5  -3    9.07    0.87
  -7  -5   3   17.68    0.85
   7  -5  -3   16.78    0.85
   7   5  -3   17.37    0.98
  -7   5   3   15.10    0.80
  -7   5   3   15.41    0.92
  -5  -5   3    9.35    0.51
   5  -5  -3   10.47    0.62
  -5  -5   3    8.97    0.48
   5  -5  -3    8.46    0.48
  -5   5   3    9.91    0.39
  -5   5   3    9.34    0.45
  -5   5   3    9.35    0.60
   5   5  -3    9.77    0.58
   3  -5  -3   28.05    1.36
  -3  -5   3   26.95    0.91
   3  -5  -3   27.20    1.09
  -3  -5   3   26.91    1.09
   3   5  -3   29.09    1.24
  -3   5   3   29.37    1.30
  -3   5   3   28.35    1.14
  -1  -5   3    2.38    0.22
  -1  -5   3    1.91    0.21
   1  -5  -3    1.98    0.13
  -1  -5   3    1.37    0.30
  -1   5   3    1.81    0.14
  -1   5   3    1.68    0.12
  -1   5   3    2.55    0.28
  -1  -5  -3    3.08    0.18
   1  -5   3    2.51    0.25
   1   5   3    3.26    0.32
   1   5   3    2.76    0.22
  -1   5  -3    3.04    0.33
   3  -5   3   10.15    0.65
  -3  -5  -3   10.32    0.50
  -3  -5  -3   10.20    0.58
  -3   5  -3   11.40    0.61
   3   5   3   10.89    0.43
   3   5   3   10.37    0.59
   5  -5   3   15.57    0.88
  -5  -5  -3   13.23    0.58
  -5  -5  -3   13.31    0.98
  -5   5  -3   16.25    1.07
   5   5   3   14.28    0.78
   5   5   3   13.79    0.52
  -7  -5  -3   13.32    1.82
   7  -5   3    9.73    0.74
   7   5   3   13.75    4.57
  -7   5  -3   12.19    0.69
   7   5   3   12.80    4.19
   9  -5   3    2.50    0.56
  -9  -5  -3    2.07    0.41
   9   5   3    1.62    0.27
  -9   5  -3    1.43    0.50
   9   5   3    1.30    0.51
  11  -5   3    2.68    0.67
 -11  -5  -3    2.25    0.42
 -11   5  -3    2.54    0.64
  13  -5   3    1.78    0.79
 -13  -5  -3    0.92    0.44
  13   5   3    1.26    0.75
 -16  -6   3    7.85    0.86
  16  -6  -3    6.77    1.28
 -16   6   3    7.18    0.92
 -14  -6   3    4.48    0.88
  14  -6  -3    4.29    0.61
  14   6  -3    4.73    0.76
 -14   6   3    4.24    0.68
  12  -6  -3    3.26    0.58
 -12   6   3    4.07    0.61
  12   6  -3    4.35    0.48
  10  -6  -3   40.49    1.78
 -10  -6   3   39.23    2.05
 -10  -6   3   41.12    1.77
  10   6  -3   36.03    1.47
 -10   6   3   39.98    2.11
   8  -6  -3    1.25    0.32
  -8  -6   3    0.87    0.27
  -8   6   3    0.87    0.27
   6  -6  -3   15.18    0.70
  -6  -6   3   13.52    0.64
  -6   6   3   15.74    0.83
  -6   6   3   15.01    0.58
   6   6  -3   14.24    0.70
   4  -6  -3  151.06    8.31
  -4  -6   3  143.73    5.80
   4  -6  -3  148.82    5.26
  -4  -6   3  143.32    6.78
   4  -6  -3  156.60    8.90
   4   6  -3  145.45    6.27
  -4   6   3  147.40    6.54
  -4   6   3  153.40    6.54
  -4   6   3  151.20    5.56
  -4   6   3  153.89    5.72
  -2  -6   3    4.70    0.30
  -2  -6   3    4.73    0.49
   2  -6  -3    4.94    0.32
   2  -6  -3    5.39    0.28
  -2   6   3    5.65    0.21
  -2   6   3    5.92    0.36
   0  -6   3    2.24    0.33
   0  -6  -3    2.66    0.14
   0  -6   3    2.72    0.36
   0   6   3    2.59    0.37
   2  -6   3  143.24    6.10
  -2  -6  -3  161.68    6.44
  -2  -6  -3  158.26    7.60
   2  -6   3  147.53    5.38
   2   6   3  152.00    5.95
   2   6   3  158.49    5.97
  -2   6  -3  146.63    5.82
  -4  -6  -3   34.48    1.46
  -4  -6  -3   33.50    1.75
   4  -6   3   27.70    1.12
   4   6   3   33.69    1.07
   4   6   3   32.50    1.34
   6  -6   3   21.48    1.01
  -6  -6  -3   22.64    1.01
   6   6   3   21.73    1.01
   6   6   3   21.70    0.89
  -6   6  -3   19.98    1.18
   8  -6   3   11.76    0.89
  -8  -6  -3   13.18    0.98
  -8   6  -3   10.18    1.02
   8   6   3   11.75    0.81
   8   6   3   12.38    0.69
 -10  -6  -3    9.21    0.96
  10  -6   3    8.57    0.78
  10   6   3   10.27    0.68
 -10   6  -3    8.28    0.95
 -12  -6  -3   24.68    2.44
  12  -6   3   22.47    2.04
 -12   6  -3   21.03    1.91
  12   6   3   21.23    1.66
 -14  -6  -3    1.08    0.60
  14  -6   3   -0.06    0.70
 -14   6  -3    0.86    0.77
 -15  -7   3    4.26    0.73
  15  -7  -3    3.98    0.69
 -15   7   3    3.93    0.73
  15   7  -3    4.62    0.77
 -13  -7   3    8.99    1.67
  13   7  -3    8.84    4.48
 -13   7   3    6.06    0.82
 -11  -7   3    3.27    0.65
  11  -7  -3    3.34    0.58
 -11  -7   3    2.75    0.25
  11   7  -3    2.29    0.50
   9  -7  -3   68.83    2.97
  -9  -7   3   65.87    3.06
  -9  -7   3   58.97    1.99
   9   7  -3   64.43    2.16
  -9   7   3   62.58    2.39
   7  -7  -3   59.99    2.99
   7  -7  -3   61.88    2.88
  -7  -7   3   57.74    2.16
   7   7  -3   63.00    2.31
  -7   7   3   64.88    2.96
  -7   7   3   61.90    3.50
   5  -7  -3   16.59    0.86
  -5  -7   3   18.47    1.11
   5  -7  -3   17.31    0.95
  -5  -7   3   19.70    0.86
   5  -7  -3   16.74    0.93
  -5   7   3   18.53    0.80
  -5   7   3   18.06    0.72
  -5   7   3   19.10    0.71
   5   7  -3   14.79    0.89
  -3  -7   3   19.18    0.81
  -3  -7   3   18.58    0.61
   3  -7  -3   17.20    1.23
   3  -7  -3   18.44    0.74
   3  -7  -3   18.52    0.68
  -3   7   3   18.62    0.71
  -3   7   3   19.41    0.78
   3   7  -3   20.31    0.80
   1  -7  -3   65.83    2.54
  -1  -7   3   65.86    1.95
  -1  -7   3   71.05    3.10
   1  -7  -3   69.22    3.10
  -1  -7   3   64.93    2.87
  -1   7   3   71.87    3.17
  -1  -7  -3   25.80    0.93
   1  -7   3   30.40    1.14
   1  -7   3   29.70    1.28
  -1  -7  -3   26.63    1.11
   1   7   3   27.03    1.22
   1   7   3   27.40    1.27
  -1   7  -3   29.14    1.40
   3  -7   3   94.88   74.85
  -3  -7  -3   59.73    2.39
  -3  -7  -3   62.98    3.98
   3   7   3   63.06    2.69
   3   7   3   61.20    2.11
  -5  -7  -3   51.47    1.98
  -5  -7  -3   50.62    4.36
   5  -7   3   49.26    1.85
   5   7   3   51.77    1.54
   5   7   3   51.08    1.74
  -5   7  -3   49.87    1.69
   7  -7   3    7.31    0.80
  -7  -7  -3    6.19    0.70
  -7   7  -3    6.53    0.59
   7   7   3    6.73    0.63
   7   7   3    4.98    0.52
  -9  -7  -3    1.95    0.48
   9   7   3    1.32    0.57
  -9   7  -3    1.63    0.53
 -11  -7  -3    1.64    0.48
  11  -7   3    1.95    0.45
 -11   7  -3    2.13    0.42
  13  -7   3    0.93    0.70
 -13  -7  -3    1.26    0.88
 -13   7  -3    3.73    0.85
  13   7   3    2.27    0.77
 -16  -8   3   15.74    1.90
  16  -8  -3   17.80    1.65
 -16   8   3   17.24    1.37
  16   8  -3   15.67    1.35
 -14  -8   3    2.26    0.67
  14   8  -3    2.66    0.62
 -14   8   3    3.00    0.55
 -12  -8   3   31.81    2.28
  12  -8  -3   31.20    1.77
 -12   8   3   32.14    1.96
  12   8  -3   31.73    1.81
 -10  -8   3   43.70    2.99
  10  -8  -3   43.79    2.08
 -10  -8   3   44.93    1.63
 -10   8   3   41.33    1.80
  10   8  -3   46.92    4.08
   8  -8  -3   14.27    1.62
   8  -8  -3   16.90    0.91
  -8  -8   3   18.03    1.04
  -8   8   3   17.71    0.88
   8   8  -3   15.87    1.12
   6  -8  -3   54.28    9.83
   6  -8  -3   40.88    1.47
  -6  -8   3   41.26    1.43
  -6   8   3   52.33    7.03
   6   8  -3   43.30    1.49
  -6   8   3   44.52    3.86
  -6   8   3   45.61    1.98
  -4  -8   3  335.05   12.20
   4  -8  -3  339.74   13.60
   4  -8  -3  316.55   20.86
   4  -8  -3  323.17   17.72
  -4  -8   3  327.65   17.28
   4   8  -3  334.38   12.60
  -4   8   3  321.51   10.63
  -2  -8   3   90.52    3.39
   2  -8  -3   87.09    3.20
  -2  -8   3   92.36    4.44
  -2  -8   3   89.47    2.59
   2  -8  -3   87.95    2.80
  -2   8   3   95.33    4.07
   0  -8   3    0.02    0.25
   0  -8   3    0.27    0.23
   0  -8  -3    0.11    0.05
   0  -8  -3    0.10    0.14
   0   8   3    0.07    0.27
  -2  -8  -3  343.61   11.14
   2  -8   3  348.62   15.24
   2  -8   3  340.96   10.91
  -2  -8  -3  315.99   13.82
   2   8   3  332.61   10.60
  -2   8  -3  340.42   17.67
   2   8   3  338.02   10.91
   4  -8   3  164.32    5.89
  -4  -8  -3  159.61   10.33
  -4  -8  -3  157.12    4.83
   4   8   3  161.52    5.72
   4   8   3  152.99    5.47
  -6  -8  -3   29.56    1.11
   6  -8   3   29.95    1.27
   6   8   3   31.31    1.19
   6   8   3   28.45    1.28
  -6   8  -3   32.05    1.38
   8  -8   3   44.98    1.81
  -8  -8  -3   44.58    2.29
   8   8   3   43.78    1.94
  -8   8  -3   45.48    2.11
 -10  -8  -3   29.60    1.59
  10  -8   3   27.18    1.68
  10   8   3   30.02    1.61
 -10   8  -3   30.89    1.62
 -12  -8  -3   32.71    2.44
  12  -8   3   33.46    2.55
 -12   8  -3   32.82    2.81
  12   8   3   30.09    2.36
  14  -8   3    0.97    0.86
 -14   8  -3    2.19    0.80
  14   8   3    2.63    0.65
  15  -9  -3   65.35    4.61
 -15  -9   3   65.94    5.40
  15   9  -3   65.56    6.06
 -15   9   3   67.31    6.87
 -13  -9   3   21.21    1.72
  13  -9  -3   20.27    1.91
  13   9  -3   23.01    1.50
 -13   9   3   22.14    1.41
  11  -9  -3   -0.05    0.42
 -11  -9   3    0.44    0.15
 -11  -9   3    0.94    0.46
 -11   9   3    0.54    0.32
  11   9  -3    0.02    0.50
  -9  -9   3  154.56    6.20
   9  -9  -3  153.53    6.25
   9   9  -3  159.86    4.91
  -9   9   3  158.03    5.96
   7  -9  -3  166.99    6.56
  -7  -9   3  170.90    4.55
   7   9  -3  164.35    5.71
  -7   9   3  159.39    7.21
  -7   9   3  163.32    7.38
  -7   9   3  163.68   10.43
   5  -9  -3  138.73    7.97
   5  -9  -3  139.06    8.32
   5  -9  -3  145.25    5.57
  -5  -9   3  137.89    4.54
  -5   9   3  149.95    6.03
  -5   9   3  147.29    5.78
   5   9  -3  143.15    5.76
  -5   9   3  145.02    5.98
   3  -9  -3  277.88    9.94
   3  -9  -3  289.47   10.55
  -3  -9   3  280.19    9.34
   3  -9  -3  276.97   13.70
  -3  -9   3  271.25   11.02
  -3   9   3  287.74   11.27
   3   9  -3  285.08   12.00
  -1  -9   3  225.12    9.25
  -1  -9   3  219.30    8.29
  -1  -9   3  214.96    9.08
   1  -9  -3  207.28    8.48
  -1   9   3  212.79    9.39
  -1  -9  -3  588.46   32.60
   1  -9   3  582.64   22.68
   1  -9   3  587.44   23.66
  -1  -9  -3  587.00   22.73
   1   9   3  592.26   19.27
   1   9   3  583.63   19.20
  -1   9  -3  580.86   25.59
  -3  -9  -3    0.57    0.17
   3  -9   3    0.69    0.33
   3  -9   3    0.86    0.32
   3   9   3    0.63    0.22
  -5  -9  -3   98.85    4.41
  -5  -9  -3  100.96    3.34
   5  -9   3   99.96    2.84
   5   9   3  101.32    2.64
   5   9   3   99.12    3.44
   7  -9   3  298.71   11.30
  -7  -9  -3  307.14   11.90
   7   9   3  309.93   11.70
  -7   9  -3  305.02   13.32
  -9  -9  -3   24.75    1.22
   9  -9   3   25.88    1.44
  -9   9  -3   26.69    1.65
   9   9   3   25.55    1.60
  11  -9   3    2.21    0.61
  11   9   3    1.28    0.39
 -11   9  -3    1.48    0.50
  13  -9   3   58.66    3.89
 -13  -9  -3   57.63    4.38
 -13   9  -3   62.34    3.82
  13   9   3   54.97    5.06
 -16 -10   3    1.31    0.74
  16 -10  -3    1.87    0.71
  16  10  -3    2.02    0.76
 -16  10   3    1.19    0.42
 -14 -10   3    7.38    0.98
  14 -10  -3    7.04    0.80
 -14  10   3    6.48    0.82
  14  10  -3    7.37    0.79
 -12 -10   3    1.62    0.65
  12 -10  -3    2.16    0.43
 -12  10   3    1.56    0.50
  10 -10  -3    7.14    0.69
 -10 -10   3    4.97    0.47
 -10 -10   3    5.94    0.57
 -10  10   3    6.03    0.45
  10  10  -3    6.26    0.69
  -8 -10   3   11.35    0.85
   8 -10  -3    9.36    0.54
  -8  10   3   10.25    1.04
  -8  10   3   10.17    0.60
   8  10  -3   10.99    0.62
   6 -10  -3   37.30    1.44
  -6 -10   3   37.20    1.28
  -6  10   3   36.80    1.78
   6  10  -3   37.18    1.27
  -6  10   3   36.88    2.29
  -6  10   3   37.75    1.79
   4 -10  -3   14.35    0.68
  -4 -10   3   15.59    0.73
   4 -10  -3   14.33    1.52
   4 -10  -3   15.56    0.66
  -4  10   3   15.87    0.62
   4  10  -3   15.76    0.78
   2 -10  -3   15.40    0.91
  -2 -10   3   15.67    0.88
   2 -10  -3   15.24    0.41
  -2 -10   3   17.77    0.78
  -2 -10   3   16.78    0.81
   0 -10  -3   42.52    2.30
   0 -10   3   43.38    1.18
   0 -10  -3   41.56    1.09
   0 -10   3   42.26    1.58
   0 -10  -3   45.34    1.52
   0 -10   3   40.45    1.38
  -2 -10  -3   65.30    3.68
   2 -10   3   66.94    2.61
  -2 -10  -3   66.61    3.54
  -2 -10  -3   66.72    2.81
   2 -10   3   65.83    2.37
   2  10   3   71.66    2.54
   2  10   3   66.46    2.29
  -4 -10  -3   98.31    4.64
  -4 -10  -3  104.16    4.08
   4 -10   3  105.54    3.11
   4  10   3  106.81    3.39
  -6 -10  -3    9.22    0.69
   6 -10   3    9.09    0.62
  -6  10  -3   10.12    0.81
   6  10   3    8.21    0.63
  -8 -10  -3    7.30    0.61
   8 -10   3    5.95    0.60
   8  10   3    7.10    0.65
  -8  10  -3    6.69    0.87
  10 -10   3    0.98    0.57
 -10 -10  -3    1.92    0.43
 -10  10  -3    1.46    0.42
  10  10   3    1.41    0.52
 -12 -10  -3    1.56    0.47
  12 -10   3    1.94    0.72
 -12  10  -3    1.08    0.57
 -14 -10  -3    5.40    0.93
 -14  10  -3    5.67    0.76
  14  10   3    6.63    0.84
  15 -11  -3   -0.52    0.55
  15  11  -3   -0.71    0.39
 -15  11   3   -0.07    0.44
 -13 -11   3    0.66    0.51
  13 -11  -3    1.53    0.50
  13  11  -3    0.00    0.40
 -11 -11   3    0.28    0.12
  11 -11  -3    0.13    0.38
 -11 -11   3    0.25    0.38
 -11  11   3    0.45    0.41
  11  11  -3   -0.29    0.35
   9 -11  -3    0.53    0.40
  -9 -11   3   -0.35    0.50
   9  11  -3    0.04    0.34
  -9  11   3   -0.12    0.27
   7 -11  -3    0.82    0.35
  -7 -11   3    1.46    0.49
  -7  11   3    0.88    0.25
  -7  11   3    1.20    0.42
  -7  11   3    1.15    0.21
   7  11  -3    0.33    0.46
   5 -11  -3    0.83    0.16
  -5  11   3    0.58    0.09
  -5  11   3    0.50    0.14
  -3 -11   3    3.40    0.40
   3 -11  -3    2.82    0.13
   3 -11  -3    2.48    0.14
  -3  11   3    2.79    0.12
   1 -11  -3    3.17    0.32
   1 -11  -3    3.43    0.13
  -1 -11   3    4.14    0.47
  -1 -11   3    3.78    0.43
  -1 -11  -3    4.92    0.29
  -1 -11  -3    4.57    0.64
  -1 -11  -3    4.72    0.23
   1  11   3    5.27    0.27
  -3 -11  -3    1.22    0.21
   3 -11   3    0.58    0.36
  -3 -11  -3    1.15    0.24
  -3 -11  -3    0.87    0.17
   3  11   3    1.08    0.19
   5 -11   3    0.95    0.51
  -5 -11  -3    0.52    0.23
  -5 -11  -3    0.13    0.30
   7 -11   3    2.81    0.68
   7  11   3    2.36    0.57
  -7  11  -3    2.63    0.91
  -9 -11  -3    1.90    1.05
   9  11   3    0.70    0.39
  -9  11  -3    0.42    0.45
 -11 -11  -3    2.58    1.41
  11 -11   3    3.11    0.65
 -11  11  -3    1.80    0.51
  11  11   3    2.43    0.56
  13 -11   3   -0.18    0.82
 -13 -11  -3    1.09    0.70
 -13  11  -3    0.99    0.58
  13  11   3    0.41    0.55
  14 -12  -3   21.26    1.45
 -14 -12   3   19.95    1.56
 -14  12   3   23.52    2.59
  14  12  -3   20.32    1.73
 -12 -12   3    0.50    0.42
  12  12  -3    0.22    0.33
 -12  12   3    0.63    0.30
  10 -12  -3    1.18    0.31
  10  12  -3    1.58    0.51
 -10  12   3    1.67    0.38
   8 -12  -3   10.14    0.66
  -8 -12   3    8.45    0.69
  -8  12   3    9.21    0.68
   8  12  -3    8.87    0.74
   6 -12  -3    1.93    0.31
  -6 -12   3    1.68    0.33
  -6  12   3    1.35    0.18
  -6  12   3    1.18    0.15
   6  12  -3    1.38    0.45
  -6  12   3    1.63    0.14
   4 -12  -3  104.83    4.75
   4 -12  -3   97.38    7.01
  -4 -12   3  103.23    3.86
   4  12  -3  108.28    4.61
  -4  12   3  105.46    3.70
   2 -12  -3   37.67    1.48
  -2 -12   3   37.40    1.38
  -2 -12   3   36.82    1.80
   0 -12  -3   15.76    0.50
   0 -12   3   13.41    0.82
   0 -12   3   13.88    0.74
   0 -12  -3   14.37    0.48
   0 -12  -3   15.18    0.47
  -2 -12  -3  103.81    3.95
   2 -12   3  112.61    6.85
  -2 -12  -3  110.35    3.26
   2 -12   3  116.58    3.11
   2  12   3  113.29    5.92
   4 -12   3    2.83    0.50
  -4 -12  -3    3.35    0.36
   4 -12   3    3.59    0.48
  -4 -12  -3    3.77    0.34
  -4 -12  -3    4.05    0.36
   4  12   3    4.01    0.36
  -6 -12  -3   22.29    1.06
   6 -12   3   21.67    1.15
  -6  12  -3   23.11    1.05
   6  12   3   21.70    1.12
  -8 -12  -3    1.84    0.61
   8 -12   3    0.03    0.65
   8  12   3    2.36    0.81
  -8  12  -3    1.04    0.61
 -10 -12  -3    1.06    0.44
  10 -12   3    0.51    0.65
  10  12   3    0.92    0.65
 -10  12  -3    0.61    0.39
  12 -12   3   15.29    1.22
 -12 -12  -3   15.67    1.26
 -12  12  -3   18.34    1.67
  12  12   3   15.42    1.64
 -15 -13   3   46.57    4.72
  15 -13  -3   47.68    3.18
  15  13  -3   44.85    4.17
 -15  13   3   49.17    4.77
 -13 -13   3   15.12    0.94
  13 -13  -3   15.91    1.66
  13  13  -3   14.13    1.21
 -13  13   3   17.52    1.24
 -11 -13   3   14.85    1.24
  11 -13  -3   13.42    1.01
  11  13  -3   14.90    1.13
 -11  13   3   15.53    0.94
  -9 -13   3  131.48    4.01
   9 -13  -3  129.40    5.93
  -9  13   3  129.17    3.64
   9  13  -3  127.24    4.62
   7 -13  -3  126.38    4.70
  -7 -13   3  124.67    5.29
  -7  13   3  123.15    7.53
  -7  13   3  125.48    6.07
   7  13  -3  126.27    4.02
  -7  13   3  125.43    5.01
   5 -13  -3  188.33    9.93
   5 -13  -3  173.34   17.24
  -5 -13   3  189.11    6.81
   5  13  -3  194.27    6.37
  -5  13   3  182.64    7.95
  -5  13   3  192.60    5.60
  -5  13   3  193.24    9.18
   3 -13  -3  107.16    3.81
  -3 -13   3  107.10    3.74
   3 -13  -3  102.97    3.87
   3  13  -3  116.65    4.11
  -1 -13   3   80.35    2.87
  -1 -13   3   80.27    2.76
   1 -13  -3   77.50    2.58
  -1 -13  -3  311.93   17.67
   1 -13   3  326.04   11.83
   1 -13   3  320.77   14.59
  -1 -13  -3  313.95    9.23
   1  13   3  321.04   15.37
  -3 -13  -3    1.79    0.26
  -3 -13  -3    1.38    0.22
   3 -13   3    2.03    0.54
   3  13   3    1.59    0.14
  -5 -13  -3   44.79    2.00
   5 -13   3   47.09    1.59
  -5 -13  -3   46.06    2.40
   5  13   3   50.66    1.48
  -7 -13  -3  199.23    7.49
   7 -13   3  195.71    5.19
   7  13   3  201.56    7.93
  -7  13  -3  203.60    7.85
   9 -13   3    1.94    0.41
  -9 -13  -3    1.90    0.40
  -9  13  -3    2.46    0.56
   9  13   3    2.57    0.57
  11 -13   3    0.59    0.44
 -11 -13  -3    0.54    0.63
  11  13   3    0.42    0.41
 -11  13  -3    1.23    0.59
  13 -13   3   44.81    3.97
 -13 -13  -3   53.03    3.89
  13  13   3   47.61    4.60
 -13  13  -3   44.00    3.01
  14 -14  -3    9.79    1.06
 -14 -14   3   12.80    1.27
 -14  14   3    9.73    0.93
  14  14  -3   10.38    1.02
 -12 -14   3   49.16    2.65
  12 -14  -3   50.62    2.44
  12  14  -3   47.65    2.79
 -12  14   3   52.22    2.97
  10 -14  -3   59.81    3.33
 -10 -14   3   55.53    2.23
  10  14  -3   52.43    2.34
 -10  14   3   55.72    3.12
  -8 -14   3   38.50    1.49
   8 -14  -3   35.03    1.96
   8  14  -3   34.13    2.18
  -8  14   3   37.99    1.49
   6 -14  -3   57.80    3.55
  -6 -14   3   56.34    1.54
   6  14  -3   53.51    1.49
  -6  14   3   58.62    4.48
  -6  14   3   59.63    3.30
  -6  14   3   55.68    3.13
  -4 -14   3  306.79   10.18
   4 -14  -3  316.29   13.70
   4  14  -3  303.52   11.50
  -4  14   3  308.36   12.64
  -2 -14   3  100.11    3.73
  -2 -14   3   96.41    3.15
   2 -14  -3   96.16    2.91
   0 -14   3    1.18    0.33
   0 -14  -3    1.54    0.10
   0 -14   3    1.46    0.32
   0 -14  -3    1.61    0.15
   0 -14  -3    1.62    0.12
  -2 -14  -3  205.71    9.09
   2 -14   3  201.61    5.87
   2 -14   3  195.54    6.85
  -2 -14  -3  188.95   14.00
   2  14   3  200.73    8.27
   4 -14   3  137.34    4.03
  -4 -14  -3  139.88    5.81
   4 -14   3  128.44    5.29
  -4 -14  -3  136.63   11.15
   4  14   3  142.43    5.47
   4  14   3  130.51    7.86
   6 -14   3   17.17    1.08
  -6 -14  -3   20.98    1.09
   6  14   3   19.89    0.93
  -6  14  -3   17.32    0.66
   8 -14   3   30.07    1.59
  -8 -14  -3   28.81    1.70
   8  14   3   29.89    1.52
  -8  14  -3   27.26    1.45
 -10 -14  -3   56.53    2.66
  10 -14   3   51.53    2.78
 -10  14  -3   54.24    3.46
  10  14   3   57.42    3.54
 -12 -14  -3   32.88    2.96
  12 -14   3   28.37    1.79
  12  14   3   30.79    1.98
 -12  14  -3   29.94    2.72
 -15 -15   3    1.23    0.58
  15 -15  -3    0.86    0.63
 -15  15   3    1.24    0.55
 -13 -15   3   10.76    1.02
  13 -15  -3   11.75    1.30
 -13  15   3   10.12    0.97
  13  15  -3   11.92    0.92
  11 -15  -3    5.49    0.56
 -11  15   3    5.71    0.74
  11  15  -3    6.36    0.79
   9 -15  -3   25.15    1.29
  -9 -15   3   23.42    1.48
  -9  15   3   26.75    1.23
   9  15  -3   24.09    1.25
   7 -15  -3   83.58    3.80
  -7 -15   3   79.58    2.43
  -7  15   3   80.20    6.11
  -7  15   3   78.72    5.08
   7  15  -3   86.92    3.02
  -7  15   3   83.11    7.50
   5 -15  -3   12.21   12.26
  -5 -15   3    8.03    0.59
  -5  15   3    7.39    0.36
   5  15  -3    6.72    0.56
   3 -15  -3   38.97    1.69
  -3 -15   3   39.12    1.60
   3 -15  -3   40.38    1.69
   3 -15  -3   41.23    1.53
  -1 -15   3   22.92    0.98
  -1 -15   3   24.30    0.89
   1 -15  -3   22.09    0.67
   1 -15   3    6.62    0.55
  -1 -15  -3    6.04    0.29
  -1 -15  -3    5.46    0.32
   1  15   3    5.41    0.26
  -3 -15  -3   22.85    1.62
   3 -15   3   24.44    1.44
  -3 -15  -3   23.88    1.24
   3 -15   3   23.16    1.16
   3  15   3   25.56    1.03
   5 -15   3   25.58    1.17
  -5 -15  -3   24.82    1.07
   5  15   3   26.07    1.32
  -7 -15  -3   10.11    0.70
   7 -15   3    9.10    0.65
  -7  15  -3    9.04    0.69
   7  15   3   11.54    0.99
  -9 -15  -3    5.82    0.53
   9 -15   3    6.30    0.84
   9  15   3    6.58    0.67
  -9  15  -3    6.51    0.76
 -11 -15  -3    5.13    0.82
  11 -15   3    5.92    0.70
 -11  15  -3    5.58    0.76
  11  15   3    4.25    0.69
 -13 -15  -3    0.61    0.63
  13 -15   3    1.18    0.60
 -13  15  -3   -0.25    0.81
  13  15   3    0.39    0.43
  14 -16  -3    9.08    1.14
 -14 -16   3   11.21    1.16
  14  16  -3    8.56    0.76
 -14  16   3    9.96    1.24
  12 -16  -3    4.45    0.63
 -12 -16   3    3.08    0.58
  12  16  -3    3.66    0.57
 -12  16   3    4.51    0.55
  10 -16  -3   59.58    2.56
 -10 -16   3   62.82    2.20
  10  16  -3   62.29    3.41
 -10  16   3   58.77    2.92
   8 -16  -3    0.32    0.24
  -8 -16   3   -0.09    0.32
  -8  16   3    0.30    0.21
   8  16  -3   -0.06    0.34
   6 -16  -3    8.05    0.47
  -6 -16   3    8.12    0.78
  -6  16   3    7.80    0.67
  -6  16   3    8.29    0.56
  -6  16   3    9.07    0.73
   6  16  -3    8.61    0.71
  -4 -16   3  135.91    4.50
   4 -16  -3  132.33    6.82
   4  16  -3  141.83    5.15
  -4  16   3  133.48    3.79
   2 -16  -3    2.44    0.12
   2 -16  -3    2.31    0.17
  -2 -16   3    2.73    0.29
  -2 -16   3    2.32    0.33
   2 -16  -3    2.26    0.11
   0 -16  -3   19.28    0.99
   0 -16   3   18.42    1.02
   0 -16  -3   19.99    1.08
   0 -16  -3   19.43    0.87
   0 -16   3   21.99    1.09
  -2 -16  -3   29.24    1.48
   2 -16   3   32.87    1.30
   2 -16   3   33.99    1.40
  -2 -16  -3   27.36    1.51
   2  16   3   28.58    1.15
  -4 -16  -3   26.75    1.21
  -4 -16  -3   22.52    2.18
   4 -16   3   27.84    1.26
   4 -16   3   26.00    1.14
   4  16   3   26.53    0.93
   4  16   3   24.20    1.99
  -6 -16  -3   17.92    0.91
   6 -16   3   18.17    1.26
   6  16   3   19.59    0.91
   8 -16   3   31.29    1.68
  -8 -16  -3   29.13    1.70
   8  16   3   31.12    1.73
  -8  16  -3   30.36    1.60
 -10 -16  -3    2.56    0.63
  10 -16   3    2.91    0.53
 -10  16  -3    2.43    0.65
  12 -16   3   18.39    2.06
 -12 -16  -3   20.91    2.30
  12  16   3   16.51    1.48
 -12  16  -3   21.06    1.58
  15 -17  -3    6.08    0.97
 -15 -17   3    7.64    0.85
  15  17  -3    7.73    0.91
 -15  17   3    6.00    0.98
 -13 -17   3    1.02    0.40
  13 -17  -3   -0.06    0.33
 -13  17   3    0.34    0.35
  13  17  -3    0.24    0.42
 -11 -17   3    0.40    0.65
  11 -17  -3   -0.05    0.26
  11  17  -3    0.33    0.42
  -9 -17   3   42.88    2.01
   9 -17  -3   39.73    2.82
   9  17  -3   41.67    2.16
  -9  17   3   38.59    2.59
   7 -17  -3    2.63    0.36
  -7 -17   3    2.70    0.51
   7  17  -3    2.55    0.38
  -7  17   3    1.89    0.25
  -5 -17   3    3.09    0.43
   5  17  -3    3.04    0.50
  -5  17   3    3.38    0.24
   3 -17  -3   11.01    0.43
   3 -17  -3   13.14    1.11
   3 -17  -3   12.39    1.15
  -3 -17   3   11.53    0.72
  -1 -17   3    0.33    0.36
   1 -17  -3    0.41    0.09
   1 -17  -3    0.35    0.11
   1 -17  -3    0.45    0.06
  -1 -17   3    0.52    0.40
   1 -17   3   10.56    0.76
  -1 -17  -3   10.25    0.37
  -1 -17  -3    8.81    0.42
   1 -17   3    9.40    0.73
   1  17   3    9.87    0.46
  -3 -17  -3    0.33    0.18
   3 -17   3    0.04    0.34
   3 -17   3    0.48    0.46
   3  17   3    0.36    0.13
  -5 -17  -3    0.69    0.30
   5 -17   3    0.73    0.45
   5  17   3    0.57    0.31
   7 -17   3   18.07    1.16
  -7 -17  -3   17.90    0.80
  -7  17  -3   19.68    1.14
   7  17   3   18.12    1.18
  -9  17  -3    0.24    0.58
 -11 -17  -3    3.33    0.52
  11  17   3    3.65    0.69
 -13 -17  -3    3.67    0.72
  13 -17   3    2.49    0.68
  13  17   3    1.53    0.66
 -13  17  -3    2.49    0.58
  14 -18  -3    5.91    0.64
 -14 -18   3    5.69    0.84
  14  18  -3    7.37    0.99
 -14  18   3    5.88    0.73
 -12 -18   3    5.27    0.60
  12 -18  -3    5.42    0.69
 -12  18   3    5.58    0.60
  12  18  -3    5.44    0.58
  10 -18  -3  153.18    9.08
 -10 -18   3  151.12    5.72
 -10  18   3  150.81    9.86
  10  18  -3  147.20    6.98
  -8 -18   3    3.74    0.56
   8 -18  -3    3.80    0.44
   8  18  -3    2.96    0.50
  -8  18   3    3.16    0.35
  -6 -18   3   11.03    1.27
   6 -18  -3   11.97    0.76
  -6  18   3   11.96    0.64
   6  18  -3   10.72    0.90
  -6  18   3   11.54    0.92
  -6  18   3   11.69    0.61
   4 -18  -3  336.42   15.50
  -4 -18   3  336.50   11.15
   4 -18  -3  331.59   14.16
   4  18  -3  324.86   11.75
   2 -18  -3   26.58    1.04
   2 -18  -3   25.75    1.05
   2 -18  -3   25.29    1.20
  -2 -18   3   27.40    1.04
  -2 -18   3   26.14    1.17
   0 -18  -3    2.84    0.20
   0 -18   3    3.11    0.32
   0 -18   3    2.52    0.36
   0 -18  -3    2.80    0.20
   0 -18  -3    2.46    0.16
  -2 -18  -3  301.40   17.36
   2 -18   3  299.73    7.64
  -2 -18  -3  323.65   10.02
   2 -18   3  311.92    9.06
   2  18   3  322.55   15.76
  -4 -18  -3   65.28    4.91
   4 -18   3   70.56    2.52
  -4 -18  -3   67.40    2.69
   4 -18   3   66.43    3.38
   4  18   3   72.66    2.43
   4  18   3   62.55    5.17
   6 -18   3   56.76    2.20
  -6 -18  -3   53.76    2.34
   6  18   3   53.59    2.19
   8 -18   3   49.60    2.66
  -8 -18  -3   52.03    2.05
   8  18   3   47.97    3.48
  -8  18  -3   52.13    2.63
 -10 -18  -3   24.73    2.08
  10 -18   3   22.57    1.65
  10  18   3   25.98    1.70
 -10  18  -3   22.29    1.49
  12 -18   3   38.38    3.84
 -12 -18  -3   42.07    3.09
 -12  18  -3   41.01    3.05
  12  18   3   37.38    4.02
 -13 -19   3   16.73    1.46
  13 -19  -3   16.17    1.66
 -13  19   3   15.22    1.85
  13  19  -3   18.52    1.19
 -11 -19   3    0.41    0.71
  11 -19  -3    0.79    0.29
 -11  19   3    1.12    0.24
  11  19  -3    0.18    0.61
  -9 -19   3   23.11    0.99
   9 -19  -3   23.26    1.35
  -9  19   3   22.98    1.59
   9  19  -3   23.83    1.36
  -7 -19   3   50.20    1.92
   7 -19  -3   51.39    3.67
   7  19  -3   49.68    1.81
  -7  19   3   46.02    5.25
  -7  19   3   49.58    3.77
  -7  19   3   47.97    4.55
   5 -19  -3    7.45    0.50
  -5 -19   3    6.84    0.52
  -5  19   3    7.44    0.35
   5  19  -3    6.79    0.82
  -3 -19   3    4.75    0.54
   3 -19  -3    5.36    0.34
  -3 -19   3    4.05    0.60
   3 -19  -3    5.23    0.32
   3 -19  -3    5.98    0.43
  -1 -19   3  164.58    5.85
   1 -19  -3  168.93    6.84
   1 -19  -3  169.63    7.22
   1 -19  -3  167.61    7.25
  -1 -19   3  164.47    7.73
  -1 -19  -3   58.10    2.39
  -1 -19  -3   56.00    2.38
   1 -19   3   53.06    1.76
   1 -19   3   51.78    1.43
  -3 -19  -3    8.66    0.54
   3 -19   3    8.56    0.56
  -3 -19  -3    8.63    0.76
   3  19   3    8.73    0.60
   3  19   3    9.77    0.60
   5 -19   3   57.94    2.53
   5 -19   3   57.05    2.67
  -5 -19  -3   58.25    2.62
   5  19   3   56.03    2.54
  -7 -19  -3   21.50    1.65
   7 -19   3   20.89    1.42
   7  19   3   22.54    1.76
  -7  19  -3   18.42    0.96
  -9 -19  -3   40.86    1.87
   9 -19   3   41.73    2.61
  -9  19  -3   40.40    2.99
   9  19   3   41.20    1.72
  11 -19   3    5.76    0.84
 -11 -19  -3    3.72    0.63
 -11  19  -3    5.76    0.75
  11  19   3    4.27    0.53
 -14 -20   3    4.22    0.65
  14 -20  -3    4.09    0.71
  14  20  -3    5.18    0.77
  12 -20  -3    8.91    0.89
 -12 -20   3    8.33    0.96
 -12  20   3    9.72    1.01
  12  20  -3   10.16    1.06
 -10 -20   3    1.00    0.50
  10 -20  -3    0.76    0.48
 -10  20   3    0.55    0.32
  -8 -20   3   15.39    0.95
   8 -20  -3   17.94    1.15
  -8  20   3   13.96    1.43
   8  20  -3   15.69    1.11
  -6 -20   3    9.13    0.87
   6 -20  -3   11.32    0.72
   6  20  -3   11.69    0.91
  -6  20   3    8.62    0.83
  -6  20   3    8.95    0.81
  -6  20   3    9.20    0.78
   4 -20  -3    7.91    0.44
   4 -20  -3    7.43    0.43
   4 -20  -3    7.53    0.45
  -4 -20   3    8.41    0.59
  -2 -20   3   24.00    1.06
   2 -20  -3   22.40    1.12
   2 -20  -3   21.50    1.03
   2 -20  -3   22.78    1.02
  -2 -20   3   21.33    1.15
   0 -20  -3    4.29    0.28
   0 -20  -3    4.42    0.27
   0 -20  -3    4.05    0.29
   0 -20   3    3.31    0.49
  -2 -20  -3    3.45    0.27
  -2 -20  -3    3.26    0.33
   2  20   3    3.74    0.29
  -4 -20  -3   64.60    2.23
   4 -20   3   61.74    2.95
  -4 -20  -3   58.62    3.32
   4 -20   3   62.67    3.04
   4  20   3   55.63    3.14
   4  20   3   62.72    3.27
   6 -20   3    3.96    0.88
  -6 -20  -3    4.93    0.49
   6  20   3    5.60    0.51
   8 -20   3    1.92    0.73
  -8 -20  -3    3.33    0.37
   8  20   3    2.51    0.43
  10 -20   3   13.87    1.25
 -10 -20  -3   17.04    1.24
  10  20   3   15.18    1.21
 -10  20  -3   12.73    1.24
 -12 -20  -3    0.74    0.43
  12 -20   3   -0.93    0.70
  12  20   3    0.11    0.40
 -12  20  -3   -0.31    0.73
 -13 -21   3    1.01    0.75
  13 -21  -3    1.16    0.49
  13  21  -3    1.18    0.69
  11 -21  -3    3.33    0.51
 -11 -21   3    4.81    0.88
  11  21  -3    4.34    0.66
 -11  21   3    5.10    0.60
   9 -21  -3  104.28    4.45
  -9 -21   3  112.01    4.00
  -9  21   3  105.72    7.00
   9  21  -3  114.45    4.35
  -7 -21   3   24.92    1.42
   7 -21  -3   29.30    1.34
   7  21  -3   31.72    2.18
  -7  21   3   26.10    2.98
  -7  21   3   26.00    2.02
   5 -21  -3   59.03    3.66
  -5 -21   3   54.16    2.07
   5  21  -3   57.54    2.26
   3 -21  -3   76.67    3.62
  -3 -21   3   79.24    3.03
  -3 -21   3   81.69    3.29
   3 -21  -3   74.66    4.44
   3 -21  -3   77.78    6.10
   1 -21  -3   79.10    4.47
  -1 -21   3   84.97    3.24
   1 -21  -3   77.31    2.64
   1 -21  -3   79.88    3.55
  -1 -21   3   84.35    3.55
  -1 -21  -3  251.87   15.42
  -1 -21  -3  264.20    8.19
   1 -21   3  272.60    9.21
   1 -21   3  264.59   11.71
  -1 -21  -3  270.16   14.12
   3 -21   3    8.74    0.78
   3 -21   3    8.23    0.78
  -3 -21  -3    9.20    0.71
  -3 -21  -3    9.44    0.52
   3  21   3    8.09    0.95
   3  21   3    8.11    0.48
   5 -21   3   14.16    0.92
   5 -21   3   11.69    0.89
  -5 -21  -3   13.89    0.80
   5  21   3   13.30    0.69
  -7 -21  -3  170.97    6.48
   7 -21   3  163.32    7.33
  -7  21  -3  169.68    7.87
   7  21   3  154.75    6.85
   9 -21   3    2.69    0.45
   9  21   3    2.37    0.37
 -11 -21  -3    5.15    0.97
 -11  21  -3    4.70    1.00
 -12 -22   3    3.77    0.76
  12 -22  -3    4.06    0.55
  12  22  -3    3.12    0.71
 -10 -22   3    0.49    0.41
  10 -22  -3    0.11    0.35
  10  22  -3    0.30    0.65
   8 -22  -3    0.63    0.31
  -8 -22   3    0.46    0.43
  -8  22   3    0.69    0.21
   8  22  -3   -0.01    0.41
   6 -22  -3   24.25    1.74
  -6 -22   3   26.95    1.39
   6  22  -3   22.17    1.29
  -6  22   3   21.30    2.33
  -6  22   3   23.33    2.20
   4 -22  -3    8.60    0.49
  -4 -22   3    9.87    0.66
   4 -22  -3    8.80    0.71
   4 -22  -3    9.01    0.53
  -2 -22   3    3.81    2.75
   2 -22  -3    3.82    0.38
   2 -22  -3    3.37    0.24
   2 -22  -3    3.66    0.19
  -2 -22   3    4.78    0.94
   0 -22  -3    4.21    0.33
   0 -22  -3    3.69    0.28
   0 -22   3    4.70    0.50
   0 -22  -3    4.61    0.21
   2 -22   3    6.30    0.67
  -2 -22  -3    4.95    0.64
  -2 -22  -3    5.39    0.35
   2 -22   3    5.90    0.79
   2  22   3    4.75    0.49
   2  22   3    5.77    0.40
   4 -22   3   22.92    1.37
   4 -22   3   20.32    1.30
  -4 -22  -3   19.94    1.16
   4  22   3   21.19    1.22
   6 -22   3    2.74    0.62
  -6 -22  -3    3.24    0.58
   6  22   3    2.71    0.50
  -8 -22  -3    2.41    0.44
   8 -22   3    2.55    0.57
   8  22   3    2.34    0.39
  10 -22   3    1.96    0.47
 -10 -22  -3    2.76    0.62
 -10  22  -3    2.53    0.79
  10  22   3    1.73    0.50
  12 -22   3    5.31    0.89
 -12 -22  -3    6.60    1.19
 -12  22  -3    6.55    1.02
  12  22   3    5.03    0.73
 -13 -23   3    4.68    0.89
  13  23  -3    5.42    0.80
 -11 -23   3    7.62    0.81
  11 -23  -3    8.28    0.85
  11  23  -3    8.58    0.98
   9 -23  -3   63.70    2.95
  -9 -23   3   61.39    2.76
   9  23  -3   61.87    3.39
  -9  23   3   60.31    3.14
  -7 -23   3   22.85    1.50
   7 -23  -3   24.59    2.15
   7  23  -3   24.30    1.28
  -7  23   3   22.78    2.11
   5 -23  -3   56.43    2.96
  -5 -23   3   52.65    2.43
   5  23  -3   57.75    1.75
   3 -23  -3   20.55    0.97
   3 -23  -3   20.56    1.19
  -3 -23   3   17.04    0.93
  -3 -23   3   18.76    1.09
   3 -23  -3   18.81    1.29
   1 -23  -3   39.01    2.87
  -1 -23   3   38.45    1.72
   1 -23  -3   37.76    1.77
   1 -23  -3   39.03    1.90
  -1 -23   3   37.17    1.53
  -1 -23  -3  103.37    5.99
  -1 -23  -3  103.47    3.18
  -1 -23  -3   98.66    7.23
   1 -23   3   97.92    4.11
   1 -23   3  100.37    5.36
  -3 -23  -3    2.42    0.32
   3 -23   3    1.72    0.50
   3 -23   3    2.58    0.55
   3  23   3    1.98    0.29
   5 -23   3    8.91    0.91
  -5 -23  -3    9.30    0.67
   5 -23   3    9.42    0.91
   5  23   3    8.79    0.72
   7 -23   3  121.64    6.22
  -7 -23  -3  126.54    7.92
   7  23   3  118.37    8.82
  -7  23  -3  113.98    6.75
   9 -23   3    4.59    0.59
  -9 -23  -3    4.13    0.67
   9  23   3    3.07    0.43
  -9  23  -3    4.34    0.71
  11 -23   3    1.01    0.49
 -11 -23  -3    0.26    0.49
 -11  23  -3    0.55    0.61
  11  23   3    0.36    0.38
 -12 -24   3    9.36    1.11
  12  24  -3   10.16    1.27
 -10 -24   3    0.86    0.57
  10  24  -3    1.37    0.47
  -8 -24   3   33.93    1.88
   8 -24  -3   33.96    1.79
   8  24  -3   35.81    1.91
  -8  24   3   30.81    4.38
   6 -24  -3   22.38    1.39
  -6 -24   3   23.08    1.08
   6  24  -3   24.17    1.77
   4 -24  -3    0.90    0.23
  -4 -24   3    0.58    0.43
   4 -24  -3    1.00    0.18
  -4 -24   3    0.22    0.43
  -2 -24   3   31.27    1.21
  -2 -24   3   28.25    1.53
   2 -24  -3   31.73    1.95
   0 -24  -3    8.06    0.47
   0 -24   3    7.12    0.87
   0 -24  -3    7.44    0.48
   0 -24   3    8.21    0.77
  -2 -24  -3    4.15    0.36
   2 -24   3    3.33    0.73
   2 -24   3    4.49    0.66
  -4 -24  -3   48.58    2.80
   4 -24   3   43.78    2.07
   4 -24   3   44.42    2.24
   4  24   3   46.70    2.81
  -6 -24  -3    2.11    0.40
   6 -24   3    2.54    0.50
   6 -24   3    3.08    0.60
   6  24   3    2.84    0.37
   8 -24   3   -0.56    0.53
  -8 -24  -3   -0.15    0.54
  -8  24  -3    0.30    0.60
   8  24   3    0.01    0.25
 -10 -24  -3   10.19    0.93
  10 -24   3    9.95    1.16
  10  24   3   12.64    1.18
 -10  24  -3   10.93    0.78
 -13 -25   3    7.90    1.10
  13  25  -3    7.33    1.22
  11  25  -3    0.90    0.68
   9 -25  -3    1.01    0.44
   9  25  -3    0.74    0.61
   7 -25  -3   33.66    2.93
  -7 -25   3   34.57    1.88
   7  25  -3   35.47    1.67
  -5 -25   3   19.06    1.39
   5 -25  -3   21.40    1.92
   3 -25  -3    2.76    0.26
   3 -25  -3    2.51    0.26
  -3 -25   3    3.14    0.57
  -3 -25   3    3.15    0.61
  -1 -25   3   16.27    1.00
   1 -25  -3   18.27    0.81
   1 -25  -3   19.08    0.84
  -1 -25   3   18.66    0.96
  -1 -25  -3   14.94    1.14
  -1 -25  -3   14.79    1.71
   1 -25   3   15.15    1.27
   1 -25   3   17.91    1.05
   3 -25   3    0.57    0.37
   3 -25   3    1.05    0.54
  -3 -25  -3    1.14    0.28
   3  25   3    0.80    0.17
   5 -25   3   13.11    0.96
   5 -25   3   13.85    1.02
  -5 -25  -3   12.52    0.89
   5  25   3   11.91    0.80
  -7 -25  -3    3.84    0.56
   7 -25   3    5.43    0.69
  -7  25  -3    6.37    0.95
   7  25   3    4.68    0.62
  -9 -25  -3    5.58    1.07
   9 -25   3    5.75    0.88
  -9  25  -3    6.50    0.72
   9  25   3    4.74    0.57
  11 -25   3    5.12    0.86
 -11 -25  -3    4.48    0.75
  11  25   3    3.63    0.57
 -11  25  -3    4.11    0.88
 -12 -26   3   17.61    1.58
  12  26  -3   18.91    1.53
 -10 -26   3   85.96    5.26
  10  26  -3   79.13    5.48
  -8 -26   3    1.04    0.63
   8 -26  -3    0.20    0.32
   8  26  -3    0.45    0.63
  -6 -26   3   13.09    1.10
   6 -26  -3   14.71    1.04
   6  26  -3   13.44    0.97
   4 -26  -3  301.49   19.53
  -4 -26   3  315.65   14.86
  -4 -26   3  316.20   14.22
   4 -26  -3  318.58   16.58
   2 -26  -3    5.74    0.38
  -2 -26   3    5.79    0.51
   2 -26  -3    6.11    0.46
  -2 -26   3    6.52    0.61
   0 -26   3   10.67    0.69
   0 -26  -3   10.17    0.92
   0 -26  -3   11.10    1.72
   0 -26   3   11.59    0.89
  -2 -26  -3  166.81    8.26
   2 -26   3  169.34    7.16
   2 -26   3  166.33    4.89
  -2 -26  -3  174.77   12.46
   4 -26   3   75.77    3.08
  -4 -26  -3   70.88    4.09
   4 -26   3   70.87    2.74
   4  26   3   74.06    4.93
   6 -26   3   32.12    1.60
  -6 -26  -3   30.07    1.46
   6 -26   3   28.62    2.15
   6  26   3   31.89    2.67
  -8 -26  -3   29.39    1.42
   8 -26   3   29.30    2.48
  -8  26  -3   30.18    1.95
   8  26   3   31.75    1.58
  10 -26   3   24.58    2.60
 -10 -26  -3   27.25    1.99
 -10  26  -3   27.84    2.45
  10  26   3   25.03    2.31
 -11 -27   3    7.91    0.84
  11  27  -3    6.66    0.74
  -9 -27   3    0.99    0.45
   9  27  -3    0.42    0.53
  -7 -27   3   23.96    1.30
   7  27  -3   24.59    1.50
  -5 -27   3    7.44    0.62
   5 -27  -3    5.56    0.79
   5 -27  -3    6.76    0.51
  -5 -27   3    5.07    0.77
   3 -27  -3    0.61    0.18
  -3 -27   3    1.27    0.48
   3 -27  -3    0.39    0.17
  -3 -27   3    0.69    0.32
   1 -27  -3   10.31    0.69
  -1 -27   3    9.49    0.67
  -1 -27   3    9.72    0.71
   1 -27  -3    9.76    0.64
  -1 -27  -3    0.38    0.24
   1 -27   3    0.85    0.60
   3 -27   3   27.53    1.44
   3 -27   3   30.21    1.55
  -3 -27  -3   26.66    1.58
  -5 -27  -3   16.98    1.23
   5 -27   3   18.54    1.16
   5 -27   3   19.30    1.59
   5  27   3   15.99    1.30
   7 -27   3    0.02    0.37
  -7  27  -3   -0.96    0.57
   7  27   3    0.01    0.30
  -9 -27  -3    5.59    0.90
   9 -27   3    5.82    0.67
  -9  27  -3    5.06    0.81
   9  27   3    3.96    0.69
 -10 -28   3    6.80    0.92
  10  28  -3    5.14    0.95
  -8 -28   3    1.34    0.72
   8  28  -3   -0.27    0.64
  -6 -28   3    0.90    0.79
  -4 -28   3   28.91    1.82
   4 -28  -3   29.36    1.56
  -4 -28   3   26.62    1.49
  -2 -28   3    3.25    0.62
  -2 -28   3    3.46    0.43
   2 -28  -3    3.52    0.40
   2 -28  -3    3.37    0.37
   0 -28  -3    0.37    0.23
   0 -28   3    0.43    0.31
   0 -28  -3    0.36    0.20
   0 -28   3    0.18    0.36
   2 -28   3   30.94    1.80
   2 -28   3   31.73    1.47
  -2 -28  -3   36.64    1.52
  -2 -28  -3   36.54    2.70
   4 -28   3    3.03    0.68
   4 -28   3    2.27    0.82
   4  28   3    2.88    0.48
   6 -28   3    1.31    0.59
   6 -28   3    2.25    0.58
  -6 -28  -3    0.88    0.34
   6  28   3    1.46    0.38
  -8 -28  -3    1.06    0.49
  -8  28  -3    0.63    0.41
   8  28   3    0.63    0.34
 -10 -28  -3    5.62    0.81
  10 -28   3    6.68    1.09
 -10  28  -3    4.56    0.75
  10  28   3    4.92    0.81
 -11 -29   3    0.07    0.50
  11  29  -3   -0.12    0.37
  -9 -29   3   11.70    1.09
   9  29  -3   10.47    1.19
  -7 -29   3    5.70    0.82
   7  29  -3    5.45    0.67
  -5 -29   3    5.75    0.71
   5 -29  -3    6.21    0.56
  -5 -29   3    5.51    0.73
  -3 -29   3   35.79    1.56
   3 -29  -3   35.68    3.20
  -3 -29   3   35.69    1.57
  -1 -29   3   23.08    1.24
  -1 -29   3   23.83    1.28
   1 -29  -3   23.44    1.82
  -1 -29  -3    7.45    0.45
   1 -29   3    8.67    0.65
   1 -29   3    7.24    0.65
  -1 -29  -3    6.80    0.85
   3 -29   3    4.98    1.05
  -3 -29  -3    4.75    0.54
   3 -29   3    5.30    0.55
   5 -29   3    9.16    1.02
  -5 -29  -3    9.25    0.77
   5 -29   3   10.06    1.03
   5  29   3   10.99    0.86
  -7 -29  -3    4.10    0.49
   7  29   3    3.55    0.53
  -7  29  -3    4.61    0.64
  -9 -29  -3    0.05    0.33
   9 -29   3    1.49    0.47
  -9  29  -3    1.16    0.48
 -10 -30   3   27.26    1.79
  10  30  -3   21.01    1.60
   8  30  -3    3.09    0.61
  -6 -30   3    0.73    0.40
  -6 -30   3   -0.25    0.57
  -4 -30   3   46.50    2.48
  -4 -30   3   47.96    2.34
   4 -30  -3   47.59    2.87
   2 -30  -3   17.71    1.50
  -2 -30   3   19.38    1.26
  -2 -30   3   14.95    1.02
   0 -30  -3    0.51    0.17
   0 -30   3    0.45    0.40
   0 -30   3    0.36    0.47
   2 -30   3   48.53    2.25
   2 -30   3   45.50    2.24
  -2 -30  -3   48.98    2.64
  -4 -30  -3   12.80    1.00
   4 -30   3   10.65    0.93
   4 -30   3   10.86    1.16
  -6 -30  -3    7.21    0.89
   6 -30   3    8.77    0.83
   6 -30   3    9.09    1.17
   6  30   3    7.72    0.60
  -8 -30  -3   29.76    2.33
   8 -30   3   28.34    2.90
  -8  30  -3   31.27    2.69
   8  30   3   28.36    2.64
  -9 -31   3   49.75    3.98
   9  31  -3   40.15    3.45
  -7 -31   3   52.86    2.52
  -5 -31   3   36.00    2.62
  -5 -31   3   38.48    2.09
  -3 -31   3   38.91    2.31
  -3 -31   3   39.84    2.43
   3 -31  -3   41.27    2.39
  -1 -31   3   63.32    2.96
   1 -31  -3   62.41    5.16
  -1 -31   3   60.67    3.35
   1 -31   3  118.64    6.32
   1 -31   3  119.12    5.37
  -1 -31  -3  124.13   11.39
   3 -31   3   -0.26    0.34
  -3 -31  -3    0.51    0.31
   5 -31   3   17.37    1.02
  -5 -31  -3   16.47    1.58
   5 -31   3   16.26    1.26
   5  31   3   14.99    1.55
   7 -31   3   81.50    6.25
  -7 -31  -3   80.59    7.24
  -7  31  -3   83.12    6.16
   7  31   3   73.81    8.11
 -10 -32   3    1.17    1.00
  10  32  -3    0.83    0.42
  -8 -32   3    4.17    0.75
   8  32  -3    3.86    0.64
  -6 -32   3   15.83    1.15
  -6 -32   3   17.11    1.22
  -4 -32   3    0.94    1.53
  -4 -32   3    1.49    1.00
  -2 -32   3   16.32    1.22
  -2 -32   3   16.69    1.18
   0 -32   3   14.11    1.08
   0 -32   3   13.13    1.25
   0 -32  -3   11.69    0.85
   2 -32   3    5.76    0.79
  -2 -32  -3    6.12    0.44
   2 -32   3    6.96    0.67
   4 -32   3   25.20    1.70
  -4 -32  -3   26.39    2.02
   4 -32   3   27.32    1.64
   6 -32   3    1.45    0.69
   6 -32   3    2.19    0.78
  -8 -32  -3    4.60    0.45
   8 -32   3    5.31    0.81
  -9 -33   3    0.57    0.44
   9  33  -3   -0.87    0.56
  -7 -33   3    0.48    0.44
  -5 -33   3    1.99    0.42
  -5 -33   3    1.48    0.71
  -3 -33   3    3.73    0.63
  -3 -33   3    2.17    0.83
  -1 -33   3    1.17    0.42
  -1 -33   3   -0.23    0.51
   1 -33   3    1.31    0.48
   1 -33   3    1.22    0.50
   3 -33   3    0.48    0.67
   3 -33   3    0.72    0.45
  -3 -33  -3    0.10    0.33
   5 -33   3   -0.32    0.46
  -5 -33  -3    0.41    0.29
   5 -33   3    0.38    0.64
  -7 -33  -3    0.15    0.24
   7 -33   3    0.40    0.56
  -7  33  -3    0.05    0.46
  -8 -34   3    2.57    0.62
  -8 -34   3    3.76    0.80
  -6 -34   3    0.23    0.44
  -6 -34   3    1.01    0.50
  -4 -34   3   18.22    1.52
  -4 -34   3   20.84    1.35
  -2 -34   3    1.65    0.48
  -2 -34   3    1.15    0.58
   0 -34   3    4.64    0.74
   0 -34   3    3.94    0.66
   2 -34   3   21.60    1.77
   2 -34   3   20.94    1.80
   4 -34   3    0.25    0.55
   4 -34   3    1.14    0.62
   6 -34   3    5.40    0.54
   6 -34   3    4.82    0.98
  -7 -35   3    6.16    1.02
  -7 -35   3    5.49    0.80
  -5 -35   3   28.34    2.35
  -5 -35   3   28.03    2.29
  -3 -35   3   11.50    0.92
  -3 -35   3   11.83    1.14
  -1 -35   3    6.84    0.80
  -1 -35   3    8.03    0.94
   1 -35   3   57.77    2.59
   1 -35   3   52.88    2.28
   3 -35   3    6.21    0.87
   3 -35   3    5.93    1.04
   5 -35   3    2.94    0.78
   5 -35   3    1.98    0.59
  -6 -36   3   14.62    1.55
  -6 -36   3   17.64    1.43
  -4 -36   3   43.15    3.91
  -4 -36   3   50.93    3.62
  -2 -36   3   28.50    2.01
  -2 -36   3   27.72    2.05
   0 -36   3    1.41    0.81
   2 -36   3   37.76    3.13
   2 -36   3   39.31    3.57
   4 -36   3   30.39    2.68
   4 -36   3   32.83    2.62
  -5 -37   3    3.46    0.72
  -3 -37   3    2.25    0.67
  -3 -37   3    2.85    0.73
  -1 -37   3    7.03    0.94
  -1 -37   3    8.31    1.00
   1 -37   3   -0.21    0.54
   1 -37   3    0.30    0.64
   3 -37   3    6.20    0.62
   3 -37   3    5.44    0.69
  -4 -38   3   16.30    1.62
  -4 -38   3   16.51    1.55
  -2 -38   3    1.56    0.62
  -2 -38   3    0.96    0.74
   0 -38   3    4.89    0.80
   0 -38   3    3.62    0.60
   2 -38   3   16.51    1.45
   2 -38   3   18.07    1.40
  -3 -39   3    5.66    0.97
  -3 -39   3    5.25    0.76
  -1 -39   3    4.14    0.84
  -1 -39   3    3.21    0.69
   1 -39   3    2.27    0.78
   1 -39   3    2.56    0.68
 -16   0   4   39.80    4.05
  16   0  -4   41.16    4.17
  14   0  -4   35.67    3.20
 -14   0   4   34.67    3.07
 -12   0   4   35.95    2.33
  12   0  -4   32.75    2.22
 -10   0   4  118.81    4.97
 -10   0   4  114.81    5.02
  10   0  -4  114.89    5.03
  -8   0   4  114.62    4.73
   8   0  -4  116.97    5.04
  -8   0   4  114.56    4.13
  -6   0   4  301.05   11.19
   6   0  -4  317.44   12.54
  -6   0   4  311.32   10.56
  -6   0   4  307.53   16.23
  -4   0   4   22.94    0.98
  -4   0   4   21.33    1.32
  -4   0   4   22.40    0.73
   4   0  -4   22.21    0.79
  -2   0   4  233.25    7.81
  -2   0   4  222.88    8.08
   2   0  -4  219.67   12.74
  -2   0   4  236.47   13.48
   0   0   4  916.62   39.91
  -2   0  -4    9.31    0.54
   2   0   4    9.01    0.45
   4   0   4    6.70    0.53
  -4   0  -4    7.51    0.59
  -6   0  -4  314.66   12.40
   6   0   4  323.42   11.13
   8   0   4  104.08    6.73
  -8   0  -4  106.52    4.27
   8   0   4  104.70    5.25
  10   0   4   45.41    2.65
 -10   0  -4   48.03    2.48
  12   0   4   88.28    7.89
 -12   0  -4   90.41    4.54
 -15  -1   4    5.55    1.01
  15  -1  -4    4.86    0.84
  15   1  -4    3.61    0.76
 -15   1   4    4.08    0.74
  13  -1  -4    4.07    0.62
 -13   1   4    2.74    0.46
  13   1  -4    3.68    0.64
 -11  -1   4    3.46    0.57
  11  -1  -4    2.83    0.52
  11   1  -4    2.92    0.42
 -11   1   4    3.28    0.38
  -9  -1   4   28.00    1.30
   9  -1  -4   23.22    0.92
  -9  -1   4   27.79    1.39
  -9   1   4   21.63    1.14
   9   1  -4   27.29    1.85
  -9   1   4   23.16    1.02
   7  -1  -4   14.67    0.77
  -7  -1   4   13.00    0.70
  -7  -1   4   14.36    0.65
  -7   1   4   14.78    0.69
  -7   1   4   13.01    0.95
  -7   1   4   13.66    0.70
   7   1  -4   16.58    0.86
  -5  -1   4    4.14    0.31
  -5  -1   4    3.98    0.38
  -5  -1   4    4.76    0.32
  -5   1   4    4.83    0.29
  -5   1   4    5.92    0.44
  -5   1   4    5.60    0.28
   5   1  -4    5.13    0.41
   3  -1  -4  110.98    5.72
  -3  -1   4  119.53    5.70
  -3  -1   4  115.36    4.90
  -3   1   4  116.78    4.50
  -3   1   4  116.11    3.21
  -3   1   4  111.36    3.30
   3   1  -4  118.63    6.71
  -3   1   4  118.17    4.55
  -1  -1   4    0.79    0.15
   1  -1  -4    0.76    0.15
  -1  -1   4    0.58    0.20
  -1  -1   4    0.72    0.18
  -1   1   4    0.81    0.16
   1   1  -4    0.56    0.16
  -1   1   4    0.60    0.17
  -1  -1  -4   49.86    2.12
   1  -1   4   48.99    1.54
  -1  -1  -4   48.39    1.93
  -1   1  -4   46.62    3.01
   1   1   4   51.48    2.45
  -3  -1  -4   57.96    1.80
   3  -1   4   61.51    1.95
  -3  -1  -4   56.32    3.33
  -3   1  -4   59.01    3.11
   3   1   4   60.58    3.16
  -5  -1  -4   14.76    0.91
   5  -1   4   12.05    0.83
   5   1   4   12.70    0.57
  -5   1  -4   11.95    0.53
   5   1   4   14.92    0.59
   7  -1   4    6.07    2.08
  -7  -1  -4    3.91    0.41
   7   1   4    4.43    0.62
  -9  -1  -4   23.75    1.29
   9  -1   4   27.07    1.29
   9  -1   4   21.02    1.48
  -9   1  -4   25.38    1.34
   9   1   4   24.63    1.45
   9   1   4   23.38    1.76
  11  -1   4    4.00    0.75
 -11  -1  -4    3.84    0.59
  11   1   4    5.23    0.86
  13  -1   4    2.01    0.66
  13   1   4    3.28    0.63
 -13   1  -4    4.20    1.01
 -16  -2   4    4.62    0.86
  16  -2  -4    4.18    0.67
 -16   2   4    4.02    0.91
  16   2  -4    4.06    0.68
 -14  -2   4    0.82    0.50
  14   2  -4    0.92    0.40
 -14   2   4    0.03    0.72
  12  -2  -4    0.88    0.42
 -12  -2   4    0.28    0.44
  12   2  -4   -0.55    0.53
 -12   2   4   -0.30    0.39
 -10  -2   4   14.30    1.13
 -10  -2   4   12.88    0.98
  10  -2  -4   12.57    0.74
  10   2  -4   14.04    0.77
 -10   2   4   16.23    0.81
  -8  -2   4    8.75    0.72
  -8  -2   4    7.91    0.73
   8  -2  -4    8.28    0.50
   8   2  -4    8.71    0.71
  -8   2   4    8.50    0.55
  -8   2   4    9.19    0.60
  -6  -2   4   48.64    1.96
   6  -2  -4   52.47    2.13
  -6  -2   4   52.20    2.44
  -6  -2   4   47.51    1.89
  -6   2   4   50.06    2.06
   6   2  -4   46.42    1.59
  -6   2   4   48.72    2.77
  -6   2   4   52.07    2.22
  -4  -2   4   29.94    1.07
   4  -2  -4   28.58    1.87
  -4  -2   4   30.52    1.45
   4  -2  -4   32.80    1.37
  -4   2   4   30.31    1.22
  -4   2   4   32.80    1.44
  -4   2   4   34.06    1.58
   4   2  -4   31.75    1.59
  -2  -2   4    4.98    0.32
  -2  -2   4    4.57    0.33
   2  -2  -4    3.89    0.26
  -2  -2   4    4.22    0.31
  -2   2   4    3.75    0.27
  -2   2   4    4.49    0.28
  -2   2   4    3.99    0.22
  -2   2   4    4.32    0.44
   0  -2   4   18.64    1.11
   0  -2  -4   15.33    0.93
   0  -2   4   16.88    0.63
   0  -2  -4   13.62    1.07
   0   2   4   15.74    0.74
   0   2   4   17.11    0.92
  -2  -2  -4    0.40    0.21
   2   2   4    0.03    0.31
   4  -2   4    9.79    0.63
  -4  -2  -4    9.48    0.58
   4   2   4    9.84    0.69
   4   2   4   10.55    0.74
  -4   2  -4   10.46    0.54
  -6  -2  -4    7.97    0.83
   6  -2   4    6.67    0.89
   6   2   4    6.14    0.71
  -6   2  -4    5.29    0.63
   8  -2   4    8.05    0.95
  -8  -2  -4    6.65    1.87
   8   2   4    8.29    4.50
  -8   2  -4    9.54    0.88
   8   2   4   15.81   12.52
  10  -2   4    8.15    0.72
 -10  -2  -4    8.94    0.79
  10   2   4    8.80    0.91
 -10   2  -4    7.41    1.00
  12  -2   4   13.14    1.69
 -12  -2  -4   13.46    1.22
  12   2   4   15.26    1.52
 -12   2  -4   12.78    1.33
  15  -3  -4    5.19    0.72
 -15   3   4    3.70    0.66
  15   3  -4    4.90    0.86
 -13  -3   4    0.17    0.47
  13   3  -4   -0.33    0.44
 -13   3   4    0.19    0.35
 -11  -3   4   43.24    2.84
  11  -3  -4   46.03    2.31
 -11  -3   4   50.84    2.86
 -11   3   4   45.55    2.73
   9  -3  -4   16.62    0.81
  -9  -3   4   16.71    0.93
  -9  -3   4   17.34    0.98
  -9   3   4   17.50    0.88
   9   3  -4   19.27    1.00
  -7  -3   4    1.46    0.34
  -7  -3   4    1.27    0.24
   7  -3  -4    1.26    0.32
  -7   3   4    1.34    0.22
  -7   3   4    1.37    0.26
  -7   3   4    1.02    0.34
   7   3  -4    1.70    0.27
   5  -3  -4   98.29    3.65
   5  -3  -4   90.07    3.48
  -5  -3   4   98.75    2.53
  -5  -3   4   98.46    4.80
  -5   3   4   95.12    3.12
  -5   3   4   98.70    3.59
  -5   3   4   95.03    4.32
   5   3  -4  107.35    4.01
  -3  -3   4    0.57    0.18
  -3   3   4    0.86    0.18
   1  -3  -4   62.32    3.04
  -1  -3   4   70.70    3.17
  -1  -3   4   68.36    2.68
  -1  -3   4   70.30    3.33
  -1   3   4   65.26    2.37
  -1   3   4   62.64    2.71
  -1   3   4   69.21    3.21
   1  -3   4  215.04    8.01
  -1  -3  -4  197.32    8.46
  -1  -3  -4  195.57    7.48
  -1   3  -4  214.24   13.39
   1   3   4  205.14    7.65
   1   3   4  200.75    8.90
  -3  -3  -4    6.56    0.52
  -3  -3  -4    6.19    0.44
   3   3   4    7.67    0.39
   5  -3   4   57.26    2.56
  -5  -3  -4   56.60    3.13
   5   3   4   57.40    2.19
   5   3   4   60.33    2.51
  -5   3  -4   60.10    2.64
   7  -3   4    8.92    0.81
  -7  -3  -4    9.39    0.72
   7   3   4    8.79    0.53
   7   3   4    9.22    0.65
  -7   3  -4    9.50    0.82
  -9  -3  -4    0.43    0.29
   9  -3   4    0.47    0.39
  -9   3  -4    1.26    0.68
   9   3   4    0.47    0.56
 -11  -3  -4   27.23    1.48
  11  -3   4   24.81    1.92
 -11   3  -4   30.96    1.85
  11   3   4   27.56    1.91
  13  -3   4    2.48    0.78
 -13   3  -4    1.08    0.63
  16  -4  -4    3.12    0.74
 -16  -4   4    2.26    0.67
 -16   4   4    2.61    0.60
  16   4  -4    2.70    0.75
  14  -4  -4    4.50    0.64
 -14   4   4    5.70    0.75
  14   4  -4    5.12    0.71
 -12  -4   4   17.12    1.17
  12  -4  -4   17.66    1.07
  12   4  -4   18.03    1.43
 -12   4   4   19.06    1.39
 -10  -4   4    9.00    0.65
  10  -4  -4    9.63    0.81
 -10  -4   4    8.19    0.75
 -10   4   4    7.81    0.73
  10   4  -4    8.26    0.49
   8  -4  -4   45.84    2.14
  -8  -4   4   41.70    1.38
  -8  -4   4   45.20    2.14
  -8   4   4   45.36    1.93
   8   4  -4   43.60    6.47
  -8   4   4   47.92    1.66
   6  -4  -4   76.62    3.13
  -6  -4   4   79.04    2.96
  -6   4   4   77.26    3.94
  -6   4   4   74.62    3.79
   6   4  -4   79.95    3.22
  -6   4   4   75.56    3.01
  -4  -4   4    0.80    0.21
  -4  -4   4    0.99    0.19
  -4   4   4    1.46    0.35
   4   4  -4    0.84    0.17
  -4   4   4    1.04    0.11
  -2  -4   4    9.04    0.36
  -2  -4   4    8.72    0.38
   2  -4  -4    9.62    0.50
  -2  -4   4    8.59    0.65
  -2   4   4   10.38    0.81
  -2   4   4    8.72    0.43
  -2   4   4    9.12    0.47
   0  -4  -4  114.94    2.67
   0  -4  -4  109.13    4.95
   0  -4   4  113.03    6.20
   0  -4   4  105.00    2.89
   0   4   4  108.74    5.06
   0   4   4  110.79    3.79
   2  -4   4   13.56    0.84
  -2  -4  -4   12.68    0.59
  -2  -4  -4   13.29    0.89
   2   4   4   14.96    0.65
   2   4   4   14.29    0.91
  -2   4  -4   12.90    0.72
  -4  -4  -4    6.63    0.47
   4  -4   4    6.75    1.00
  -4  -4  -4    6.25    0.37
   4   4   4    5.70    0.47
   4   4   4    7.09    0.52
   6  -4   4   45.21    1.77
  -6  -4  -4   43.32    1.56
  -6   4  -4   43.49    1.75
   6   4   4   44.99    1.48
   6   4   4   44.80    1.48
   8  -4   4    7.84    0.83
  -8  -4  -4   10.42    0.93
   8   4   4    7.59    0.69
   8   4   4    9.92    1.06
  -8   4  -4   10.08    0.70
  10  -4   4   -0.05    0.43
 -10  -4  -4   -0.54    0.50
  10   4   4    1.16    0.56
 -10   4  -4    0.76    0.48
  12  -4   4    4.14    0.82
 -12  -4  -4    4.12    0.66
 -12   4  -4    2.66    0.75
 -15  -5   4    1.17    0.53
  15  -5  -4    1.17    0.53
  15   5  -4    1.10    0.82
 -15   5   4    0.97    0.45
  13  -5  -4   10.73    1.00
 -13  -5   4   11.40    0.95
 -13   5   4   14.50    1.18
  13   5  -4   13.18    1.07
 -11  -5   4  203.47   16.45
  11  -5  -4  217.09    9.23
 -11  -5   4  220.67    7.06
 -11   5   4  232.67   10.02
  11   5  -4  211.50    9.52
  -9  -5   4   30.61    1.15
   9  -5  -4   24.96    1.27
  -9  -5   4   29.55    1.49
   9   5  -4   28.36    1.82
  -9   5   4   24.92    1.50
  -7  -5   4    1.19    0.39
   7   5  -4    1.59    0.28
  -7   5   4    1.20    0.23
  -7   5   4    1.31    0.42
  -7   5   4    1.06    0.21
   5  -5  -4  402.21   17.19
   5  -5  -4  427.78   17.97
  -5  -5   4  393.79   12.27
  -5  -5   4  407.02   30.36
   5   5  -4  423.86   14.35
  -5   5   4  411.20   22.60
  -5   5   4  416.31   14.38
  -3  -5   4  223.18   11.26
   3  -5  -4  231.41    8.98
  -3  -5   4  237.81    8.88
  -3   5   4  241.57   10.07
  -3   5   4  235.99    9.97
  -3   5   4  242.92   10.02
  -1  -5   4  100.16    3.31
   1  -5  -4  100.38    4.30
  -1  -5   4  101.25    4.13
  -1  -5   4   97.57    3.97
  -1   5   4  104.28    3.74
  -1   5   4  101.36    4.62
  -1   5   4  103.11    4.47
   1  -5   4  211.63    7.89
   1  -5   4  209.48    9.91
  -1  -5  -4  206.79   12.91
  -1  -5  -4  215.92    6.12
  -1   5  -4  203.18   11.40
   1   5   4  219.97    6.27
   1   5   4  215.85    7.36
  -3  -5  -4  149.56    5.56
  -3  -5  -4  139.05    7.93
   3  -5   4  139.32    5.30
   3   5   4  146.70    5.86
   3   5   4  149.15    5.63
  -5  -5  -4  235.39    9.30
   5  -5   4  225.13    6.38
  -5   5  -4  216.26    6.94
   5   5   4  235.59    7.68
   5   5   4  238.67    6.82
   7  -5   4   21.76    1.10
  -7  -5  -4   20.30    1.01
   7   5   4   21.79    1.77
   7   5   4   22.59    1.63
  -7   5  -4   23.23    1.46
  -9  -5  -4   64.63    2.96
   9  -5   4   59.14    3.48
   9   5   4   59.28    2.59
  -9   5  -4   57.05    3.00
   9   5   4   66.54    2.77
  11  -5   4   65.62    4.99
 -11  -5  -4   78.90    3.84
  11   5   4   71.09    4.84
 -11   5  -4   65.21    4.45
 -13  -5  -4    0.54    0.39
  13  -5   4    0.29    0.56
  13   5   4    0.18    0.52
  16  -6  -4    0.78    0.65
 -16  -6   4    0.61    0.52
  16   6  -4    0.96    0.42
 -16   6   4    0.41    0.52
  14  -6  -4   20.35    1.73
 -14  -6   4   19.36    1.33
  14   6  -4   17.58    1.59
 -14   6   4   18.16    1.73
  12  -6  -4    0.19    0.46
 -12  -6   4    1.33    0.48
 -12  -6   4    0.57    0.21
  12   6  -4    0.00    0.41
  10  -6  -4    1.68    0.31
 -10  -6   4    2.23    0.40
 -10  -6   4    1.41    0.48
  10   6  -4    2.26    0.44
 -10   6   4    1.73    0.34
  -8  -6   4   68.62    2.46
   8  -6  -4   68.61    3.40
   8   6  -4   69.04    2.54
  -8   6   4   67.73    4.18
  -8   6   4   70.25    4.00
  -6  -6   4   -0.33    0.35
   6   6  -4    0.00    0.27
  -6   6   4    0.68    0.35
  -6   6   4    0.40    0.18
  -6   6   4    0.33    0.18
  -4  -6   4   88.93    3.21
  -4  -6   4   79.58    5.65
   4  -6  -4   83.79    3.34
   4  -6  -4   80.28    3.09
  -4   6   4   81.03    3.57
  -4   6   4   79.04    3.04
   4   6  -4   87.95    2.88
  -2  -6   4   55.45    2.37
   2  -6  -4   55.52    1.88
  -2  -6   4   55.33    3.40
  -2  -6   4   57.41    2.02
  -2   6   4   58.98    2.74
  -2   6   4   60.15    2.41
  -2   6   4   55.49    1.89
   0  -6   4    1.50    0.33
   0  -6   4    2.11    0.34
   0  -6  -4    1.45    0.17
   0   6   4    1.16    0.38
   0   6   4    1.67    0.19
   2  -6   4   49.66    1.59
   2  -6   4   45.84    1.71
  -2  -6  -4   45.65    2.60
  -2  -6  -4   44.90    2.33
  -2  -6  -4   44.36    1.68
   2   6   4   48.45    2.32
   2   6   4   47.51    2.15
   4  -6   4   11.59    0.65
  -4  -6  -4   10.37    0.57
  -4  -6  -4   10.61    0.59
   4   6   4   10.23    0.54
   4   6   4   10.74    0.52
   6  -6   4    0.07    0.34
  -6  -6  -4    0.44    0.29
   6   6   4   -0.20    0.26
   6   6   4   -0.11    0.43
  -6   6  -4    0.52    0.39
  -8  -6  -4   38.55    1.75
   8  -6   4   42.07    1.66
   8   6   4   34.57    2.97
  -8   6  -4   37.73    2.17
   8   6   4   36.52    1.56
  10  -6   4   10.01    1.03
 -10  -6  -4    7.52    0.72
 -10   6  -4    8.08    1.05
  10   6   4    9.65    1.02
 -12  -6  -4    1.04    0.71
  12  -6   4   -0.40    0.45
 -12   6  -4   -0.69    0.66
  12   6   4    0.33    0.45
  15  -7  -4    1.12    0.37
 -15  -7   4   -0.17    0.68
  15   7  -4    0.61    0.69
  13  -7  -4    2.54    0.44
 -13   7   4    1.74    0.35
 -11  -7   4   19.54    1.58
  11  -7  -4   18.26    1.08
 -11  -7   4   20.84    1.19
  11   7  -4   19.68    1.25
 -11   7   4   20.09    1.45
  -9  -7   4   29.98    1.46
  -9  -7   4   30.50    1.30
   9  -7  -4   30.45    1.49
  -9   7   4   32.19    1.70
   9   7  -4   32.47    1.43
  -7  -7   4    7.24    0.56
   7  -7  -4    8.12    0.59
   7   7  -4    6.91    0.57
  -7   7   4    6.45    0.42
  -7   7   4    7.78    0.34
   5  -7  -4   11.69    0.60
   5  -7  -4   12.94    0.61
  -5   7   4   12.37    0.44
   5   7  -4   14.19    0.83
  -5   7   4   13.62    0.92
   3  -7  -4   56.29    2.57
  -3  -7   4   57.88    4.28
  -3  -7   4   58.65    1.95
  -3  -7   4   62.76    2.55
  -3   7   4   57.08    1.87
  -3   7   4   54.54    2.04
  -3   7   4   58.00    5.76
   1  -7  -4    6.73    0.34
  -1  -7   4    8.05    0.56
  -1  -7   4    6.84    0.59
  -1  -7   4    6.52    0.40
  -1   7   4    7.31    0.36
  -1   7   4    6.70    0.26
  -1   7   4    6.04    0.56
   1  -7   4    3.23    0.33
  -1  -7  -4    2.72    0.21
  -1  -7  -4    2.58    0.21
  -1  -7  -4    2.38    0.22
   1  -7   4    2.65    0.36
   1   7   4    2.52    0.41
   1   7   4    2.27    0.23
  -3  -7  -4   23.93    1.14
  -3  -7  -4   23.14    1.23
   3  -7   4   24.70    1.04
   3   7   4   24.67    1.21
   3   7   4   25.00    1.08
   5  -7   4   21.08    1.41
  -5  -7  -4   19.32    0.98
   5   7   4   18.59    0.92
   5   7   4   18.81    0.97
  -7  -7  -4    1.15    0.44
   7   7   4    0.81    0.27
   7   7   4    0.96    0.46
  -7   7  -4    1.29    0.48
  -9  -7  -4   11.90    0.96
   9  -7   4   15.01    1.23
  -9   7  -4   14.43    0.87
   9   7   4   15.51    1.04
 -11  -7  -4    5.43    1.06
  11  -7   4    4.04    0.77
 -11   7  -4    4.86    0.62
  11   7   4    5.54    0.94
  13  -7   4   -0.50    0.51
 -13  -7  -4    1.02    0.57
 -13   7  -4   -0.67    0.71
  13   7   4    0.39    0.62
  14  -8  -4    0.07    0.31
  14   8  -4    0.67    0.42
 -14   8   4    0.43    0.44
  12  -8  -4   13.66    0.94
 -12  -8   4   12.96    1.03
 -12  -8   4   10.92    1.11
 -12   8   4   10.92    0.95
  12   8  -4   11.30    1.09
  10  -8  -4   38.95    2.44
 -10  -8   4   41.07    1.56
 -10  -8   4   38.95    2.04
  10   8  -4   40.60    2.06
 -10   8   4   38.59    1.73
  -8  -8   4   44.84    1.87
   8  -8  -4   44.97    1.65
   8   8  -4   39.82    2.02
  -8   8   4   39.40    1.61
  -8   8   4   39.71    2.50
   6  -8  -4  185.80   35.09
  -6  -8   4  149.25    5.35
  -6   8   4  174.15   22.68
  -6   8   4  155.75    6.67
  -6   8   4  160.90    8.15
   6   8  -4  160.00    5.96
  -6   8   4  153.94    4.95
   4  -8  -4   39.51    1.63
   4  -8  -4   37.89    1.72
  -4  -8   4   37.62    1.45
  -4   8   4   38.31    1.50
   4   8  -4   38.64    1.70
  -4   8   4   39.01    1.82
   2  -8  -4    7.31    0.26
  -2  -8   4    6.87    0.57
  -2  -8   4    7.98    0.50
  -2   8   4    6.59    0.58
   0  -8   4  253.64    9.50
   0  -8  -4  226.41   14.99
   0  -8   4  249.28    7.79
   0   8   4  243.74    8.33
   0   8   4  236.22   11.61
  -2  -8  -4    2.54    0.21
   2  -8   4    2.89    0.40
  -2  -8  -4    3.19    0.32
   2  -8   4    2.55    0.41
   2   8   4    2.59    0.49
   2   8   4    2.60    0.24
   4  -8   4    8.67    0.77
  -4  -8  -4   10.37    0.51
  -4  -8  -4    9.82    0.74
   4   8   4    8.52    0.53
   4   8   4   11.42    0.60
   6  -8   4  131.71   16.18
  -6  -8  -4  124.84    4.07
  -6   8  -4  130.04    9.94
   6   8   4  123.01    4.56
   6   8   4  127.31    3.96
   8  -8   4    7.67    0.64
  -8  -8  -4    8.52    0.62
  -8   8  -4    9.20    0.88
   8   8   4    7.79    0.66
  10  -8   4    6.69    0.94
 -10  -8  -4    6.24    0.75
  12  -8   4   12.28    1.08
 -12  -8  -4   12.27    1.60
  12   8   4   12.69    1.57
 -12   8  -4   14.36    1.21
 -15  -9   4    0.06    0.61
  15   9  -4    1.24    0.52
 -15   9   4    0.78    0.50
  13  -9  -4   -0.16    0.24
 -13  -9   4    0.15    0.33
  13   9  -4    0.07    0.35
 -13   9   4    0.13    0.32
 -11  -9   4   50.33    4.88
 -11  -9   4   51.19    2.16
  11  -9  -4   49.81    3.29
  11   9  -4   49.98    2.43
 -11   9   4   46.35    3.56
  -9  -9   4    0.95    0.51
   9  -9  -4    1.73    0.41
   9   9  -4    0.46    0.31
  -9   9   4    1.00    0.24
  -7  -9   4   -0.04    0.27
   7  -9  -4   -0.19    0.24
   7   9  -4    0.37    0.41
  -7   9   4    0.03    0.13
   5  -9  -4   88.46    6.99
  -5  -9   4   94.25    2.78
   5  -9  -4   92.83    4.70
  -5   9   4   91.58    3.61
   5   9  -4   93.72    3.44
   3  -9  -4   24.09    0.86
  -3  -9   4   21.24    1.17
  -3  -9   4   22.94    0.84
  -3   9   4   21.93    1.11
  -1  -9   4   22.70    0.84
   1  -9  -4   21.03    1.01
  -1  -9   4   21.91    1.06
  -1   9   4   20.91    1.02
  -1  -9  -4   76.07    2.88
  -1  -9  -4   72.78    2.54
   1  -9   4   76.06    3.25
   1  -9   4   74.38    2.68
   1   9   4   74.64    3.42
   1   9   4   70.81    2.70
  -3  -9  -4   31.16    1.52
   3  -9   4   32.79    1.11
  -3  -9  -4   31.50    1.89
   3  -9   4   32.49    1.23
   3   9   4   30.87    1.21
   3   9   4   33.47    1.19
  -5  -9  -4   89.51    4.00
   5  -9   4   91.40    2.93
   5   9   4   92.52    2.36
   5   9   4   89.54    2.94
   7  -9   4   21.96    1.11
  -7  -9  -4   19.94    1.13
   7   9   4   20.71    1.38
  -7   9  -4   21.13    1.48
   7   9   4   22.61    1.06
   9  -9   4    5.50    0.78
  -9  -9  -4    5.17    0.89
  -9   9  -4    4.92    0.76
   9   9   4    4.17    0.61
 -11  -9  -4   26.93    2.17
  11  -9   4   27.96    2.25
  11   9   4   28.52    2.00
 -11   9  -4   25.94    1.91
  13  -9   4    0.66    0.61
  13   9   4   -0.40    0.38
 -13   9  -4    0.99    0.62
  14 -10  -4   13.45    1.11
 -14  10   4   10.94    1.43
  14  10  -4   14.29    1.24
 -12 -10   4   15.89    0.96
  12 -10  -4   13.69    0.98
  12  10  -4   14.00    2.16
 -12  10   4   13.23    0.85
 -10 -10   4   20.26    1.16
  10 -10  -4   23.59    1.14
 -10  10   4   22.36    2.16
  10  10  -4   19.02    0.86
   8 -10  -4   68.77    3.80
  -8 -10   4   72.48    2.15
  -8  10   4   71.07    3.40
  -8  10   4   62.71    4.43
   8  10  -4   71.20    2.27
  -8  10   4   66.42    4.22
   6 -10  -4   95.17    8.11
   6 -10  -4  102.78    3.45
  -6 -10   4   92.84    3.38
  -6  10   4   99.19    4.51
   6  10  -4   96.71    3.13
  -4 -10   4    0.66    0.35
  -4  10   4    0.30    0.06
   4  10  -4    0.27    0.24
   2 -10  -4  109.16    3.20
  -2 -10   4  108.22    3.45
  -2 -10   4  109.98    4.13
  -2  10   4  109.97    3.91
   0 -10   4  295.83    9.99
   0 -10  -4  295.08   11.07
   0 -10   4  284.34    9.29
   0 -10  -4  296.81   14.77
   0  10   4  307.15   11.96
  -2 -10  -4   15.35    0.67
   2 -10   4   13.49    0.79
   2 -10   4   15.14    0.67
  -2 -10  -4   14.52    0.60
   2  10   4   14.10    0.75
   2  10   4   15.45    0.80
  -4 -10  -4   13.81    0.81
   4 -10   4   13.86    0.86
  -4 -10  -4   11.66    0.98
   4  10   4   13.36    0.83
   4  10   4   12.69    0.66
   6 -10   4  102.28    4.14
  -6 -10  -4  111.52    4.79
  -6  10  -4  107.18    5.12
   6  10   4  113.65    3.75
  -8 -10  -4   42.02    1.96
   8 -10   4   40.79    2.08
   8  10   4   45.55    1.63
  -8  10  -4   41.71    2.29
  10 -10   4    5.02    0.88
 -10 -10  -4    5.26    0.69
 -10  10  -4    4.81    0.71
  10  10   4    5.37    0.64
  12 -10   4   14.80    1.34
 -12 -10  -4   14.75    1.30
 -12  10  -4   15.29    1.53
  12  10   4   11.86    1.40
 -15 -11   4   13.76    1.51
  15 -11  -4   11.81    1.29
  15  11  -4   15.34    1.71
 -15  11   4   15.30    1.77
  13 -11  -4    4.25    0.59
 -13  11   4    5.47    0.63
  13  11  -4    6.25    0.77
  11 -11  -4    1.25    0.51
 -11 -11   4    2.23    0.75
 -11  11   4    1.08    0.39
  11  11  -4    1.43    0.81
  -9 -11   4   12.57    0.82
   9 -11  -4   16.43    0.97
   9  11  -4   13.62    1.06
  -9  11   4   13.78    0.61
   7 -11  -4    2.37    0.29
  -7  11   4    1.83    0.22
  -7  11   4    1.98    0.26
   7  11  -4    2.56    0.42
  -7  11   4    2.14    0.21
  -5 -11   4    1.01    0.48
   5 -11  -4    0.55    0.13
   5 -11  -4    0.42    0.11
   5  11  -4    0.82    0.55
  -5  11   4    0.35    0.09
  -3 -11   4  138.89    5.09
   3 -11  -4  139.33    4.08
  -3 -11   4  143.48    5.08
   1 -11  -4   27.13    0.83
  -1 -11   4   26.55    1.22
   1 -11  -4   26.37    0.74
  -1 -11   4   30.50    1.13
  -1  11   4   28.87    1.45
  -1 -11  -4    6.49    0.35
   1 -11   4    7.76    0.61
  -1 -11  -4    6.99    0.39
   1 -11   4    7.63    0.50
   1  11   4    7.38    0.50
   1  11   4    7.11    0.37
   3 -11   4   93.29    2.77
   3 -11   4   96.27    4.16
  -3 -11  -4   92.50    3.68
  -3 -11  -4   95.86    5.15
   3  11   4   99.93    3.16
   3  11   4   97.89    4.20
  -5 -11  -4   14.81    0.54
   5 -11   4   15.18    0.81
   5  11   4   13.52    0.53
   7 -11   4   20.28    0.96
  -7 -11  -4   22.39    1.04
  -7  11  -4   19.40    1.11
   7  11   4   20.94    1.09
  -9 -11  -4   15.11    0.98
   9 -11   4   12.74    0.82
   9  11   4   13.96    1.08
  -9  11  -4   13.33    1.12
 -11 -11  -4    0.25    0.62
  11 -11   4   -0.49    0.56
 -11  11  -4   -0.55    0.66
  13 -11   4    1.52    0.51
 -13  11  -4    2.51    0.56
  13  11   4    1.80    0.47
 -14 -12   4   13.08    1.50
  14 -12  -4   13.92    1.37
  14  12  -4   14.94    1.45
 -14  12   4   13.51    1.62
 -12 -12   4   17.33    1.21
  12 -12  -4   13.68    1.17
  12  12  -4   16.62    1.10
 -12  12   4   14.99    1.32
 -10 -12   4   40.56    1.35
  10 -12  -4   32.93    2.57
 -10  12   4   34.98    2.18
  10  12  -4   40.60    1.89
   8 -12  -4   29.95    1.64
  -8 -12   4   28.97    1.09
  -8  12   4   29.18    1.70
   8  12  -4   31.86    1.25
  -8  12   4   29.41    1.57
  -8  12   4   27.52    2.84
  -6 -12   4  119.27    3.95
   6 -12  -4  109.41    7.83
   6 -12  -4  120.94    5.56
  -6  12   4  117.33    4.54
   6  12  -4  117.35    3.87
  -4 -12   4    1.48    0.37
   4  12  -4    0.98    0.34
  -2 -12   4   90.02    2.59
  -2 -12   4   88.91    2.66
   0 -12  -4  215.50    7.81
   0 -12   4  228.59    6.66
   0 -12   4  237.43    6.76
   2 -12   4   10.61    0.65
  -2 -12  -4   12.73    0.65
  -2 -12  -4   12.51    0.62
   2 -12   4   12.02    0.66
   2  12   4   12.15    0.61
   4 -12   4    4.63    0.56
  -4 -12  -4    3.68    0.40
  -4 -12  -4    3.66    0.27
   4  12   4    2.79    0.37
  -6 -12  -4  101.48    3.63
   6 -12   4  114.55    4.28
   6  12   4  102.00    6.52
  -6  12  -4  117.95    4.33
   8 -12   4   32.25    1.56
  -8 -12  -4   29.09    1.67
   8  12   4   29.63    2.06
  -8  12  -4   32.89    2.00
 -10 -12  -4    3.20    0.60
  10  12   4    3.33    0.50
 -12 -12  -4   16.63    1.43
  12 -12   4   16.55    1.63
  12  12   4   18.07    1.72
 -12  12  -4   15.62    1.85
 -15 -13   4    2.36    0.60
  15  13  -4    1.49    0.54
 -13 -13   4    8.69    1.16
  13 -13  -4    7.34    0.64
 -13  13   4    7.75    0.79
  13  13  -4    7.85    1.04
 -11 -13   4   92.69    4.08
  11 -13  -4   93.67    4.76
 -11  13   4   90.75    6.13
  11  13  -4   95.05    4.54
  -9 -13   4    0.02    0.36
   9 -13  -4    0.25    0.20
  -9  13   4    0.02    0.16
   9  13  -4    0.25    0.43
  -7 -13   4   22.66    1.04
   7 -13  -4   20.66    1.18
   7  13  -4   19.88    1.12
  -7  13   4   20.18    1.27
   5 -13  -4   79.31    4.46
  -5 -13   4   76.47    2.82
   5 -13  -4   69.50    6.22
   5  13  -4   76.48    3.03
  -5  13   4   78.09    2.92
  -3 -13   4   72.90    2.56
  -3 -13   4   73.57    2.61
  -1 -13   4   37.86    1.46
  -1 -13   4   40.00    1.23
   1 -13  -4   39.41    1.21
   1 -13   4  109.52    3.32
  -1 -13  -4  108.47    3.86
  -1 -13  -4  108.62    3.60
   1 -13   4  106.82    3.94
   1  13   4  107.42    4.61
  -3 -13  -4   59.03    3.08
   3 -13   4   64.83    1.98
   3 -13   4   62.24    1.86
  -3 -13  -4   61.69    2.23
   3  13   4   63.45    2.46
   5 -13   4  105.19    4.38
  -5 -13  -4  104.12    4.19
   5  13   4  105.66    5.53
  -7 -13  -4    5.67    0.58
   7 -13   4    6.13    0.46
   7  13   4    5.19    0.58
  -7  13  -4    4.57    0.63
   9 -13   4   14.53    0.80
  -9  13  -4   13.46    1.11
   9  13   4   13.65    0.96
  11 -13   4   33.75    3.30
 -11 -13  -4   35.25    2.76
  11  13   4   34.12    1.74
 -11  13  -4   36.18    2.72
  14 -14  -4    0.30    0.40
 -14 -14   4   -0.41    0.43
  14  14  -4    0.59    0.38
 -12 -14   4   15.26    0.90
  12 -14  -4   17.01    1.19
 -12  14   4   16.29    1.77
  12  14  -4   17.12    1.45
 -10 -14   4   16.37    1.23
  10 -14  -4   15.60    1.21
 -10  14   4   12.13    0.96
  10  14  -4   13.84    1.24
  -8 -14   4    6.70    0.55
   8 -14  -4    6.43    0.55
  -8  14   4    5.83    0.64
   8  14  -4    7.05    0.58
  -8  14   4    5.60    0.54
   6 -14  -4   92.93    3.66
  -6 -14   4   90.72    2.48
   6 -14  -4   82.22    8.21
   6  14  -4   85.28    3.63
  -6  14   4   93.22    3.84
  -4 -14   4   37.94    1.69
  -2 -14   4    5.03    0.51
  -2 -14   4    3.83    0.42
   0 -14   4  167.57    4.70
   0 -14   4  166.03    5.63
   0 -14  -4  170.74    5.53
  -2 -14  -4    5.94    0.45
   2 -14   4    6.60    0.48
  -2 -14  -4    5.90    0.50
   2 -14   4    5.99    0.51
   2  14   4    5.98    0.30
   4 -14   4    1.20    0.59
  -4 -14  -4    1.59    0.33
   4 -14   4    1.70    0.39
  -4 -14  -4    1.36    0.20
   4  14   4    1.47    0.20
   6 -14   4   62.47    2.29
  -6 -14  -4   66.03    3.51
   6  14   4   61.12    3.80
   8 -14   4    0.55    0.61
  -8 -14  -4    0.83    0.30
  -8  14  -4    0.55    0.46
   8  14   4    0.31    0.37
 -10 -14  -4    3.62    0.54
  10 -14   4    5.06    0.93
  10  14   4    2.75    0.58
 -10  14  -4    4.16    0.74
 -12 -14  -4   17.08    1.79
  12 -14   4   16.38    1.45
  12  14   4   18.61    1.62
 -12  14  -4   14.39    1.50
 -15 -15   4    0.69    0.50
  15  15  -4   -0.52    0.43
  13 -15  -4    3.14    0.58
 -13  15   4    2.47    0.57
  13  15  -4    2.61    0.75
  11 -15  -4    9.33    0.83
 -11 -15   4    8.27    0.66
 -11  15   4    8.49    1.13
  11  15  -4    9.46    1.01
  -9 -15   4   22.57    1.36
   9 -15  -4   26.01    1.34
   9  15  -4   27.74    1.26
  -9  15   4   25.86    1.35
  -7 -15   4   14.47    0.87
   7 -15  -4   13.44    1.01
  -7  15   4   15.37    1.66
   7  15  -4   15.41    0.68
   5 -15  -4    7.57    0.46
  -5 -15   4    5.90    0.72
  -5  15   4    7.31    0.32
   5  15  -4    6.53    0.59
  -3 -15   4   32.39    1.14
  -3 -15   4   34.45    1.46
  -1 -15   4    2.24    0.91
   1 -15  -4    3.37    0.14
   1 -15   4    1.58    0.51
  -1 -15  -4    2.29    0.20
   1 -15   4    2.00    0.56
  -1 -15  -4    2.19    0.18
   1  15   4    2.10    0.18
   3 -15   4   40.61    1.74
  -3 -15  -4   42.88    2.47
   3 -15   4   37.20    2.10
  -3 -15  -4   42.01    3.45
   3  15   4   40.78    3.00
   5 -15   4   16.61    0.77
  -5 -15  -4   18.70    1.01
   5  15   4   17.67    1.09
   7 -15   4    0.93    0.42
  -7 -15  -4    0.17    0.29
   7  15   4   -0.07    0.25
  -7  15  -4   -0.74    0.70
  -9 -15  -4   17.70    0.95
   9 -15   4   15.17    1.10
  -9  15  -4   16.66    1.08
   9  15   4   16.51    1.30
  11 -15   4    3.22    0.79
 -11 -15  -4    3.34    0.71
  11  15   4    3.38    0.68
 -11  15  -4    2.01    0.60
 -14 -16   4    6.24    0.78
  14  16  -4    7.73    1.12
 -12 -16   4    1.62    0.42
  12 -16  -4    1.45    0.43
  12  16  -4    2.67    0.65
  10 -16  -4   11.84    1.15
 -10 -16   4   12.21    0.87
  10  16  -4   10.89    0.96
 -10  16   4    9.02    0.99
  -8 -16   4   38.06    1.86
   8 -16  -4   38.87    2.93
  -8  16   4   36.81    3.72
   8  16  -4   39.23    1.90
  -8  16   4   37.05    3.96
  -6 -16   4    5.63    0.65
   6 -16  -4    4.16    0.26
  -6  16   4    4.86    0.28
   6  16  -4    6.14    0.65
  -4 -16   4   46.20    1.81
  -4 -16   4   40.13    1.62
   2 -16  -4   18.46    0.54
  -2 -16   4   18.00    0.77
  -2 -16   4   18.69    0.95
   0 -16   4    1.14    0.27
   0 -16  -4    1.45    0.10
   2 -16   4   18.37    1.01
  -2 -16  -4   16.99    0.96
   2 -16   4   18.86    0.87
  -2 -16  -4   15.22    0.83
   2  16   4   18.28    0.90
  -4 -16  -4    3.98    0.59
   4 -16   4    5.36    0.55
  -4 -16  -4    4.41    0.41
   4  16   4    5.65    0.39
  -6 -16  -4    0.45    0.23
   6  16   4   -0.09    0.33
  -8 -16  -4   14.14    0.88
   8 -16   4   13.60    0.96
  -8  16  -4   13.57    1.07
   8  16   4   16.34    1.29
 -10 -16  -4    8.61    0.88
  10 -16   4    9.25    1.04
  10  16   4   11.39    1.36
 -10  16  -4    9.43    0.84
  12 -16   4   -0.87    0.71
  12  16   4    0.22    0.34
 -12  16  -4   -0.29    0.56
 -13 -17   4    2.75    0.95
  13  17  -4    4.38    0.80
  11 -17  -4  143.52    7.73
 -11 -17   4  144.99    7.89
  11  17  -4  135.05    7.19
   9 -17  -4    9.58    0.92
  -9 -17   4   10.96    1.44
   9  17  -4    8.11    0.94
  -9  17   4    7.95    1.21
  -7 -17   4    0.80    0.30
   7 -17  -4    1.02    0.23
  -7  17   4    0.82    0.15
   7  17  -4    1.13    0.42
  -5 -17   4  242.62    7.74
   5 -17  -4  234.61    9.00
   5 -17  -4  227.52    7.53
   5  17  -4  228.07    8.62
  -3 -17   4  119.08    4.85
  -3 -17   4  123.14    4.09
  -1 -17   4   83.13    3.11
  -1 -17   4   80.55    3.63
   1 -17  -4   79.17    3.17
   1 -17   4  217.39    6.21
  -1 -17  -4  212.44   11.43
   1 -17   4  220.78    7.07
  -1 -17  -4  206.92   11.62
   3 -17   4   87.70    3.10
  -3 -17  -4   78.22    6.46
   3 -17   4   84.82    3.32
  -3 -17  -4   86.86    4.51
   3  17   4   84.12    4.82
   5 -17   4  120.50    4.65
  -5 -17  -4  114.05    6.86
   5 -17   4  125.52    4.61
   5  17   4  120.35    5.49
  -7 -17  -4    9.61    0.75
   7 -17   4   10.75    0.81
   7  17   4    7.75    0.68
  -7  17  -4   10.32    0.83
   9 -17   4   34.79    1.63
  -9 -17  -4   28.68    2.10
   9  17   4   28.68    1.65
  -9  17  -4   30.08    2.21
  11 -17   4   64.02    5.44
 -11 -17  -4   65.18    6.07
  11  17   4   62.94    4.65
 -11  17  -4   66.56    4.86
 -14 -18   4    4.50    0.76
 -12 -18   4    0.11    0.66
  12  18  -4    1.22    0.67
 -10 -18   4   12.48    1.16
  10 -18  -4   11.09    1.17
  10  18  -4   12.29    1.37
  -8 -18   4   50.66    2.42
   8 -18  -4   50.89    3.84
   8  18  -4   48.33    3.19
   6 -18  -4   54.45    4.54
  -6 -18   4   57.20    1.93
   6  18  -4   56.42    2.18
  -6  18   4   54.14    2.90
  -4 -18   4    1.80    0.32
  -4 -18   4    1.43    0.43
  -2 -18   4   70.50    2.55
  -2 -18   4   73.56    2.77
   2 -18  -4   65.93    3.09
   0 -18   4   93.00    3.84
   0 -18  -4   98.98    3.60
   0 -18   4   97.34    2.69
  -2 -18  -4   22.48    1.09
  -2 -18  -4   21.67    1.42
   2 -18   4   24.46    1.33
   2 -18   4   22.95    1.05
   2  18   4   22.18    1.14
   4 -18   4    4.88    0.61
  -4 -18  -4    5.06    0.45
   4 -18   4    5.49    0.65
   4  18   4    5.74    0.39
  -6 -18  -4   36.28    2.53
   6 -18   4   37.68    1.89
   6  18   4   36.86    1.93
   8 -18   4   44.25    2.51
  -8 -18  -4   40.87    2.67
   8  18   4   38.89    3.01
  -8  18  -4   42.27    2.35
  10 -18   4    1.44    0.47
 -10 -18  -4    1.80    0.51
 -10  18  -4    1.40    0.76
  10  18   4    1.11    0.49
 -13 -19   4   -0.19    0.68
  13  19  -4   -0.30    0.38
 -11 -19   4   14.06    1.38
  11  19  -4   16.26    1.37
   9 -19  -4    4.49    0.66
  -9 -19   4    4.04    0.67
   9  19  -4    3.63    0.54
  -7 -19   4   20.73    0.92
   7 -19  -4   22.65    1.07
   7  19  -4   21.01    1.07
   5 -19  -4   58.22    2.49
  -5 -19   4   56.92    1.91
   5 -19  -4   61.04    3.11
   5  19  -4   57.78    2.62
  -3 -19   4    0.29    0.37
  -3 -19   4    0.03    0.60
  -1 -19   4   13.14    0.90
   1 -19  -4   12.46    0.65
  -1 -19   4   11.45    1.27
   1 -19   4   21.07    1.28
  -1 -19  -4   26.07    1.36
  -1 -19  -4   26.98    1.08
   1 -19   4   23.95    3.03
  -1 -19  -4   23.82    1.20
  -3 -19  -4    0.79    0.18
   3 -19   4    0.64    0.38
   3 -19   4    1.36    0.55
   3  19   4    0.75    0.19
  -5 -19  -4   14.91    1.19
   5 -19   4   15.03    1.04
   5 -19   4   11.91    0.86
   5  19   4   14.94    1.33
  -7 -19  -4   17.30    0.88
   7 -19   4   16.57    1.11
   7  19   4   18.78    1.35
  -7  19  -4   16.85    0.97
   9 -19   4    1.11    0.48
  -9 -19  -4    0.82    0.37
   9  19   4    1.08    0.29
  -9  19  -4    1.62    0.68
 -11 -19  -4   11.64    1.21
  11 -19   4   10.51    1.14
  11  19   4    9.84    1.08
 -11  19  -4   13.35    1.44
 -12 -20   4    1.63    0.63
  12  20  -4    1.39    0.56
 -10 -20   4   17.83    1.35
  10  20  -4   16.83    1.38
   8 -20  -4    3.89    0.37
  -8 -20   4    5.06    0.51
   8  20  -4    3.69    0.74
   6 -20  -4    2.35    0.28
  -6 -20   4    2.05    0.43
   6  20  -4    1.59    0.51
  -4 -20   4   12.70    0.66
  -4 -20   4   13.77    0.90
  -2 -20   4    1.49    0.37
   2 -20  -4    1.91    0.13
  -2 -20   4    2.05    0.41
   0 -20   4    6.48    0.78
   0 -20   4    7.91    0.69
   0 -20  -4    6.22    0.42
  -2 -20  -4    6.42    0.44
   2 -20   4    6.62    0.63
   2 -20   4    5.20    0.49
   2  20   4    5.82    0.46
  -4 -20  -4    9.90    1.08
   4 -20   4    9.68    0.79
   4  20   4   10.40    0.67
  -6 -20  -4    6.39    0.78
   6 -20   4    8.78    0.96
   6  20   4    8.02    0.84
  -8 -20  -4    1.59    0.31
   8  20   4    1.44    0.51
  -8  20  -4    1.94    0.64
  10 -20   4    6.02    0.89
 -10 -20  -4    5.76    0.92
  10  20   4    6.82    0.94
 -10  20  -4    5.47    0.66
 -13 -21   4   -0.03    0.69
  13  21  -4    0.73    0.52
 -11 -21   4    0.37    0.36
  11  21  -4   -0.25    0.60
  -9 -21   4   22.81    1.42
   9  21  -4   25.54    1.56
  -7 -21   4   -0.01    0.36
   7  21  -4    1.03    0.55
  -5 -21   4    0.42    0.48
  -3 -21   4   15.05    1.02
   3 -21  -4   16.36    0.88
  -3 -21   4   15.54    1.14
  -1 -21   4    3.99    0.45
  -1 -21   4    4.17    0.52
   1 -21  -4    4.39    0.24
  -1 -21  -4    1.69    0.17
   1 -21   4    1.34    0.32
  -1 -21  -4    1.51    0.20
   3 -21   4    4.89    0.64
  -3 -21  -4    5.67    0.37
   3  21   4    5.88    0.35
  -5 -21  -4    0.12    0.29
   5 -21   4   -0.24    0.65
   5 -21   4    0.48    0.32
   5  21   4   -0.12    0.20
   7 -21   4   -0.47    0.43
  -7 -21  -4    0.19    0.27
  -7  21  -4    0.03    0.63
  -9 -21  -4    5.92    0.78
   9 -21   4    6.22    0.92
   9  21   4    7.20    0.78
  -9  21  -4    6.14    0.65
  11 -21   4   -0.21    0.41
 -11 -21  -4    0.19    0.61
 -11  21  -4    0.32    0.53
  11  21   4   -0.17    0.31
 -12 -22   4   16.32    1.60
  12  22  -4   15.79    1.46
 -10 -22   4   42.82    2.70
  10  22  -4   43.66    3.05
  -8 -22   4   52.32    2.70
   8  22  -4   50.50    2.25
  -6 -22   4  200.99    8.72
   6  22  -4  200.58    8.91
  -4 -22   4    8.89    0.74
  -4 -22   4    7.28    0.59
   2 -22  -4   50.67    2.77
  -2 -22   4   57.38    4.48
  -2 -22   4   53.85    7.50
   0 -22   4  291.22    8.81
   0 -22   4  288.24    9.10
   0 -22  -4  289.37   18.23
   2 -22   4    7.96    0.83
  -2 -22  -4    7.58    0.68
   2 -22   4    8.21    0.65
   4 -22   4    0.02    0.56
  -4 -22  -4    0.74    0.23
   4 -22   4    0.91    0.48
   4  22   4    0.09    0.21
   6 -22   4  169.65    8.97
  -6 -22  -4  155.15   13.29
   6  22   4  153.22   13.07
   8 -22   4   25.87    1.94
  -8 -22  -4   26.96    1.80
  -8  22  -4   27.20    2.32
   8  22   4   22.42    1.39
 -10 -22  -4   11.76    0.99
  10 -22   4   12.29    1.16
 -10  22  -4   13.63    1.19
 -13 -23   4   14.45    1.31
  13  23  -4   12.01    1.85
 -11 -23   4    7.33    0.92
  11  23  -4    6.23    0.88
  -9 -23   4   18.57    1.70
   9  23  -4   18.25    1.41
  -7 -23   4   16.83    1.39
   7  23  -4   16.29    0.95
  -5 -23   4    3.67    0.65
  -5 -23   4    3.47    0.65
  -3 -23   4   86.71    3.34
  -3 -23   4   85.11    3.58
   3 -23  -4   87.97    4.33
   1 -23  -4    2.69    0.22
  -1 -23   4    2.25    0.49
  -1 -23   4    2.24    0.38
   1 -23   4   11.60    0.81
  -1 -23  -4    9.88    0.92
   1 -23   4   10.85    0.96
  -3 -23  -4   48.18    3.00
   3 -23   4   46.87    1.77
   3 -23   4   47.47    2.19
   3  23   4   46.58    3.52
  -5 -23  -4    4.58    0.44
   5 -23   4    3.82    0.57
   5 -23   4    3.33    0.49
   5  23   4    3.77    0.45
  -7 -23  -4    5.21    0.65
   7 -23   4    4.14    0.69
  -7  23  -4    5.42    0.82
   7  23   4    3.63    0.41
  -9 -23  -4   16.73    1.42
   9 -23   4   13.93    1.66
   9  23   4   15.24    1.90
  -9  23  -4   18.99    1.57
 -12 -24   4   -0.94    0.77
  12  24  -4   -0.06    0.57
 -10 -24   4    0.20    0.47
  10  24  -4    0.55    0.56
  -8 -24   4    4.69    0.94
   8  24  -4    6.54    0.83
  -6 -24   4    4.04    0.77
   6  24  -4    3.03    0.58
  -4 -24   4   11.90    0.89
  -4 -24   4   12.26    1.03
   2 -24  -4    0.40    0.16
  -2 -24   4    0.15    0.36
  -2 -24   4    0.36    0.42
   0 -24  -4    0.69    0.16
   0 -24   4    1.49    0.49
   0 -24   4    0.36    0.35
  -2 -24  -4    0.47    0.19
   2 -24   4    0.08    0.47
   2 -24   4    0.19    0.34
   4 -24   4    0.03    0.40
  -4 -24  -4    0.42    0.24
   4 -24   4   -0.38    0.39
  -6 -24  -4    2.47    0.44
   6  24   4    1.75    0.36
   8 -24   4    2.07    0.82
   8  24   4    1.80    0.34
  -8  24  -4    2.67    0.84
 -10 -24  -4    4.24    0.72
  10 -24   4    4.85    1.12
  10  24   4    5.84    0.71
 -11 -25   4   34.14    2.20
  11  25  -4   31.73    1.97
  -9 -25   4    1.16    0.49
   9  25  -4    1.20    0.57
  -7 -25   4   -0.51    0.58
   7  25  -4   -0.90    0.57
  -5 -25   4   48.65    2.71
  -5 -25   4   46.67    2.12
  -3 -25   4    8.92    8.00
  -1 -25   4   33.17    1.77
  -1 -25   4   37.63    1.63
   1 -25   4   58.84    2.50
   1 -25   4   60.53    2.30
  -1 -25  -4   58.43    4.28
   3 -25   4    0.29    0.36
   3 -25   4   -0.21    0.43
  -3 -25  -4    0.60    0.24
   5 -25   4   31.65    2.00
   5 -25   4   37.38    1.49
  -5 -25  -4   34.14    2.75
   5  25   4   32.14    3.30
  -7 -25  -4    3.41    0.56
   7 -25   4    3.54    0.63
   7  25   4    2.38    0.43
  -7  25  -4    2.46    0.53
   9 -25   4   -0.26    0.61
  -9  25  -4   -0.54    0.62
 -12 -26   4   12.22    1.20
  12  26  -4   12.80    1.35
  10  26  -4   -0.77    0.71
  -8 -26   4    0.14    0.61
   8  26  -4    0.21    0.66
  -6 -26   4   22.10    1.48
  -6 -26   4   20.35    1.48
  -4 -26   4    1.12    0.40
  -4 -26   4   -0.22    0.43
  -2 -26   4    0.10    0.49
  -2 -26   4    0.55    0.33
   0 -26   4   11.27    0.93
   0 -26   4   11.36    1.65
  -2 -26  -4    1.64    0.22
   2 -26   4    0.84    0.70
  -4 -26  -4    1.76    0.28
   4 -26   4    1.04    0.69
   4 -26   4    2.94    0.68
   4  26   4    2.08    0.34
  -6 -26  -4   17.82    1.47
   6 -26   4   22.30    1.67
   6  26   4   18.03    2.11
  -8 -26  -4    0.52    0.39
   8 -26   4   -0.41    0.60
  -8  26  -4    1.29    0.59
 -11 -27   4   67.37    5.49
  11  27  -4   66.38    6.00
  -9 -27   4    4.81    0.71
   9  27  -4    5.87    0.62
  -7 -27   4    1.30    0.47
  -5 -27   4  111.00    5.43
  -5 -27   4  114.08    5.60
  -3 -27   4   46.18    3.98
  -3 -27   4   46.30    2.28
  -1 -27   4   28.00    1.64
  -1 -27   4   29.96    1.76
   1 -27   4   76.70    4.11
   1 -27   4   75.61    3.71
   3 -27   4   64.93    3.50
   3 -27   4   67.20    3.96
   5 -27   4   73.34    4.21
   5 -27   4   72.18    4.24
  -5 -27  -4   68.74    6.40
  -7 -27  -4    6.24    0.82
   7 -27   4    7.95    0.79
  -7  27  -4    9.49    1.01
   9 -27   4   16.46    1.49
  -9 -27  -4   19.07    1.75
  -9  27  -4   19.49    1.86
 -10 -28   4    0.66    0.50
  10  28  -4    0.55    0.69
  -8 -28   4   19.01    1.48
   8  28  -4   18.75    1.43
  -6 -28   4    0.47    0.51
  -6 -28   4    0.86    0.40
  -4 -28   4    7.65    1.02
  -4 -28   4   10.97    0.86
  -2 -28   4   54.37    3.12
  -2 -28   4   54.48    2.38
   0 -28   4   -0.44    0.53
   0 -28   4    0.27    0.51
   2 -28   4   34.81    2.53
   2 -28   4   31.67    1.66
   4 -28   4   10.38    0.86
   4 -28   4    8.37    0.91
   6 -28   4    0.18    0.52
   6 -28   4    0.56    0.55
   8 -28   4   25.47    1.92
  -8  28  -4   25.25    1.55
  -9 -29   4    2.34    1.06
   9  29  -4    0.99    0.43
  -7 -29   4    0.48    0.53
  -5 -29   4   12.23    0.88
  -5 -29   4   11.15    0.96
  -3 -29   4   11.05    1.01
  -3 -29   4   12.21    1.10
  -1 -29   4    0.71    0.48
  -1 -29   4    1.05    0.43
   1 -29   4    1.75    0.58
   1 -29   4    2.52    0.63
   3 -29   4   11.35    0.92
   3 -29   4   11.92    1.07
   5 -29   4    9.00    0.93
   5 -29   4    5.80    0.93
   7 -29   4    0.35    0.54
  -7  29  -4   -0.78    0.67
 -10 -30   4   20.71    2.01
  10  30  -4   21.58    2.19
  -8 -30   4   12.07    1.13
  -6 -30   4   24.38    1.53
  -6 -30   4   26.03    2.20
  -4 -30   4    7.14    0.82
  -4 -30   4    9.42    0.86
  -2 -30   4   12.62    1.22
  -2 -30   4   12.52    0.99
   0 -30   4   92.62    6.12
   0 -30   4   97.74    5.48
   2 -30   4    0.39    0.61
   2 -30   4   -0.18    0.49
   4 -30   4    0.39    0.48
   4 -30   4   -0.14    0.40
   6 -30   4   49.62    4.25
   6 -30   4   51.41    3.82
  -9 -31   4    0.81    0.84
   9  31  -4    0.56    0.53
  -7 -31   4    7.72    1.15
  -7 -31   4    7.13    1.09
  -5 -31   4   11.32    1.07
  -5 -31   4    9.80    0.83
  -3 -31   4    0.71    0.45
  -3 -31   4   -0.38    0.61
  -1 -31   4   11.32    0.78
  -1 -31   4   10.48    0.84
   1 -31   4   10.58    0.87
   1 -31   4    9.28    0.93
   3 -31   4    0.01    0.37
   3 -31   4    0.24    0.47
   5 -31   4    3.07    0.67
   7 -31   4    8.75    1.23
  -7  31  -4   12.28    1.26
  -8 -32   4   30.20    2.48
  -8 -32   4   25.45    2.36
  -6 -32   4   30.72    2.08
  -6 -32   4   28.93    2.08
  -4 -32   4    1.63    1.54
  -4 -32   4    1.61    1.42
  -2 -32   4   17.07    1.51
  -2 -32   4   15.65    1.29
   0 -32   4   38.82    2.02
   0 -32   4   41.45    2.43
   2 -32   4    5.99    0.63
   2 -32   4    5.66    1.00
   4 -32   4    3.21    0.63
   4 -32   4    3.20    0.64
   6 -32   4   20.53    2.40
   6 -32   4   24.08    1.98
  -7 -33   4    0.36    0.46
  -7 -33   4    0.26    0.42
  -5 -33   4    0.35    0.53
  -5 -33   4    0.88    0.46
  -3 -33   4   22.83    1.45
  -3 -33   4   21.14    1.75
  -1 -33   4    2.13    0.46
   1 -33   4    4.35    0.66
   1 -33   4    5.27    0.66
   3 -33   4   20.45    1.50
   3 -33   4   20.95    1.72
   5 -33   4    6.01    0.88
   5 -33   4    5.11    0.80
  -6 -34   4   35.39    3.09
  -6 -34   4   28.09    2.36
  -4 -34   4    0.51    0.61
  -4 -34   4   -0.30    0.41
  -2 -34   4    2.96    0.57
  -2 -34   4    3.11    0.72
   0 -34   4   39.44    3.50
   0 -34   4   40.60    3.03
   2 -34   4    0.25    0.40
   2 -34   4    0.73    0.42
   4 -34   4    1.05    0.45
   4 -34   4   -0.30    0.47
  -5 -35   4   28.88    2.66
  -5 -35   4   27.72    1.93
  -3 -35   4   20.93    2.03
  -3 -35   4   19.06    1.76
  -1 -35   4    3.06    0.67
   1 -35   4   11.54    1.20
   1 -35   4   12.33    1.04
   3 -35   4   19.88    1.55
   3 -35   4   17.41    1.62
  -4 -36   4    8.91    1.03
  -4 -36   4    8.74    0.98
  -2 -36   4    2.19    0.47
  -2 -36   4    2.16    0.70
   0 -36   4   11.41    1.35
   0 -36   4   14.76    0.98
   2 -36   4    3.55    0.73
   2 -36   4    2.53    1.05
  -3 -37   4    3.01    0.66
  -1 -37   4    0.69    0.51
   1 -37   4   -0.41    0.67
   1 -37   4    0.83    0.48
  14   0  -5    0.09    0.29
 -14   0   5    0.40    0.29
  12   0  -5    0.30    0.34
 -12   0   5   -0.21    0.41
 -10   0   5    0.64    0.30
  10   0  -5    0.61    0.44
  -8   0   5   -0.13    0.31
  -8   0   5    0.24    0.28
   8   0  -5   -0.28    0.24
  -6   0   5    0.34    0.24
  -6   0   5   -0.42    0.28
   6   0  -5   -0.25    0.21
  -4   0   5    0.19    0.23
  -2   0   5   -0.24    0.26
  -2   0   5    0.07    0.15
   0   0   5    0.35    0.24
   0   0   5    0.26    0.12
   2   0   5    0.29    0.21
  -2   0  -5   -0.06    0.15
   4   0   5   -0.50    0.38
  -4   0  -5   -0.46    0.27
   6   0   5   -0.24    0.25
   6   0   5    0.10    0.35
  -6   0  -5    0.80    0.42
   8   0   5    0.14    0.30
  -8   0  -5    0.21    0.37
   8   0   5    0.23    0.40
 -10   0  -5    0.69    0.46
  10   0   5    0.69    0.37
 -12   0  -5   -0.41    0.43
  12   0   5    0.31    0.40
 -15  -1   5    7.21    0.86
  15  -1  -5    5.48    0.86
 -15   1   5    7.13    0.86
  15   1  -5    7.09    1.03
 -13  -1   5   29.58    2.31
  13  -1  -5   29.97    3.00
  13   1  -5   30.43    2.26
 -13   1   5   32.18    2.34
  11  -1  -5    6.29    0.76
 -11  -1   5    7.25    0.80
 -11  -1   5    7.73    0.62
 -11   1   5    5.96    0.60
  11   1  -5    5.72    0.83
  -9  -1   5   27.11    1.31
  -9  -1   5   24.46    1.52
   9  -1  -5   28.47    1.48
   9   1  -5   25.03    1.27
  -9   1   5   27.49    1.41
  -9   1   5   28.59    1.90
  -7  -1   5  229.34    7.26
  -7   1   5  221.85    6.96
   7   1  -5  224.74    8.78
  -5  -1   5    1.01    0.48
  -5  -1   5    1.09    0.23
  -5  -1   5    0.83    0.19
   5  -1  -5    0.62    0.19
  -5   1   5    0.65    0.18
  -5   1   5    1.05    0.21
   5   1  -5    0.64    0.21
  -3  -1   5    1.11    0.29
  -3  -1   5    1.22    0.21
  -3  -1   5    1.02    0.17
  -3  -1   5    0.75    0.19
  -3   1   5    1.05    0.25
  -3   1   5    1.12    0.19
  -3   1   5    1.21    0.15
  -1  -1   5  272.16   10.93
  -1  -1   5  281.98   12.45
  -1   1   5  277.80   11.51
  -1   1   5  287.74   11.12
  -1  -1  -5   60.55    2.68
   1  -1   5   56.83    2.19
   1   1   5   60.26    2.12
  -1   1  -5   54.60    2.70
   1   1   5   55.96    1.70
   3  -1   5    3.66    0.43
   3   1   5    3.81    0.34
   3   1   5    4.14    0.62
   5  -1   5  118.02    4.59
  -5  -1  -5  120.20    4.55
  -5   1  -5  107.91    4.49
   5   1   5  112.48    4.94
   5   1   5  121.63    3.25
   7  -1   5   28.72    5.07
  -7  -1  -5   30.98    1.89
   7  -1   5   26.01    1.92
   7   1   5   30.63    1.79
  -7   1  -5   27.34    2.20
   7   1   5   32.33    1.60
  -9  -1  -5   31.06    1.87
   9  -1   5   28.16    2.31
   9  -1   5   26.60    1.67
  -9   1  -5   29.72    1.78
   9   1   5   24.83    1.97
   9   1   5   31.84    2.54
 -11  -1  -5   10.31    0.88
  11  -1   5   12.08    0.97
  11   1   5   11.49    1.29
 -11   1  -5   11.92    1.24
  14  -2  -5    0.99    0.42
 -14  -2   5    0.74    0.52
 -14   2   5    1.62    0.52
 -12  -2   5    0.27    0.36
  12  -2  -5    0.41    0.43
 -12   2   5    0.75    0.31
  12   2  -5    0.85    0.44
 -10  -2   5   38.46    1.69
  10  -2  -5   40.18    1.61
 -10  -2   5   36.99    1.89
  10   2  -5   39.64    2.07
 -10   2   5   40.58    2.36
 -10   2   5   38.48    2.11
  -8  -2   5    1.32    0.30
   8  -2  -5    1.01    0.27
  -8   2   5    0.56    0.34
  -8   2   5    0.88    0.29
   8   2  -5    0.53    0.30
  -6  -2   5    4.79    0.42
   6  -2  -5    4.47    0.44
  -6   2   5    4.97    0.59
  -6   2   5    4.80    0.41
   6   2  -5    5.70    0.48
  -4  -2   5   67.12    2.12
  -4  -2   5   68.88    3.05
  -4  -2   5   63.34    5.50
  -4   2   5   68.20    4.24
  -4   2   5   72.76    3.39
  -4   2   5   70.12    4.48
  -4   2   5   68.86    2.67
  -2  -2   5    0.32    0.10
  -2  -2   5    0.44    0.21
  -2  -2   5    0.50    0.26
  -2   2   5    0.16    0.16
  -2   2   5    0.59    0.15
   0  -2   5   26.27    1.02
   0  -2   5   24.93    1.83
   0   2   5   25.17    1.14
   0   2   5   25.91    1.27
   0   2   5   26.51    1.05
  -2  -2  -5   67.74    4.35
   2  -2   5   63.89    2.38
   2   2   5   64.50    2.68
   2   2   5   67.61    2.91
   4  -2   5    0.94    0.40
  -4  -2  -5    1.57    0.30
   4   2   5    1.66    0.33
   4   2   5    1.41    0.30
  -6  -2  -5    6.38    0.57
   6  -2   5    4.72    0.66
   6   2   5    6.01    0.66
   6   2   5    5.98    0.55
  -6   2  -5    6.01    0.62
  -8  -2  -5    8.28    0.56
   8  -2   5    6.74    0.78
   8  -2   5    6.37    0.68
  -8   2  -5    7.42    0.83
   8   2   5   11.97    7.18
   8   2   5    5.68    0.77
 -10  -2  -5    1.83    0.50
  10  -2   5    2.63    1.73
 -10   2  -5    1.42    0.80
  10   2   5    1.29    0.38
 -12  -2  -5    3.65    0.50
  12  -2   5    4.49    0.89
  12   2   5    4.15    0.73
 -12   2  -5    3.07    0.51
  15  -3  -5   12.80    1.24
 -15  -3   5   10.09    0.87
 -15   3   5   10.83    2.04
  15   3  -5    9.73    1.20
 -13  -3   5    3.54    0.75
  13  -3  -5    5.48    0.70
 -13   3   5    4.05    0.50
  13   3  -5    4.94    0.61
 -11  -3   5    0.81    0.27
 -11  -3   5    0.96    0.32
  11  -3  -5    1.27    0.29
  11   3  -5    1.33    0.31
 -11   3   5    1.25    0.28
  -9  -3   5   20.09    1.10
   9  -3  -5   18.28    0.81
  -9  -3   5   18.28    0.94
   9   3  -5   19.47    1.15
  -9   3   5   15.53    1.50
  -9   3   5   17.04    1.20
  -7  -3   5   55.09    2.30
  -7  -3   5   58.11    2.61
   7  -3  -5   57.76    2.36
  -7   3   5   55.25    2.03
   7   3  -5   56.68    2.53
  -7   3   5   51.11    3.63
  -7   3   5   50.14    3.70
  -5  -3   5   43.36    1.68
   5  -3  -5   44.34    1.89
  -5   3   5   41.72    2.35
  -5   3   5   41.29    2.58
  -5   3   5   43.95    1.82
   5   3  -5   40.29    1.59
  -3  -3   5   32.52    1.87
  -3  -3   5   30.20    1.40
   3  -3  -5   31.38    1.35
  -3  -3   5   31.52    1.34
  -3   3   5   32.94    1.52
  -3   3   5   33.54    1.79
  -3   3   5   28.00    1.70
   1  -3  -5   27.52    2.11
  -1  -3   5   32.37    3.15
  -1  -3   5   32.37    1.76
  -1  -3   5   32.74    1.64
  -1   3   5   29.87    1.11
  -1   3   5   29.84    1.62
  -1   3   5   29.82    1.22
  -1  -3  -5   61.45    2.65
   1  -3   5   61.73    2.36
   1   3   5   63.24    2.34
   1   3   5   66.57    1.94
   3  -3   5    3.18    0.49
  -3  -3  -5    2.45    0.27
  -3  -3  -5    3.01    0.34
   3   3   5    3.20    0.40
   3   3   5    2.79    0.41
  -5  -3  -5   25.81    1.50
   5  -3   5   25.77    1.67
  -5   3  -5   25.14    1.44
   5   3   5   24.08    1.20
   5   3   5   23.06    0.92
  -7  -3  -5   35.81    1.68
   7  -3   5   35.42    2.15
  -7   3  -5   37.77    2.00
   7   3   5   37.08    1.88
   7   3   5   35.29    2.20
   9  -3   5    4.28    0.43
  -9  -3  -5    3.92    0.77
   9  -3   5    4.36    0.83
  -9   3  -5    5.25    0.58
   9   3   5    5.01    0.67
 -11  -3  -5    1.10    0.71
  11  -3   5    2.18    0.70
  11   3   5    1.39    0.48
 -11   3  -5    2.21    0.64
 -14  -4   5    0.24    0.31
  14  -4  -5    0.36    0.40
  14   4  -5    0.67    0.35
 -14   4   5    1.30    0.39
 -12  -4   5  103.92    4.73
  12  -4  -5  102.08    8.15
 -12  -4   5  102.81    9.74
  12   4  -5   99.96    6.91
 -12   4   5  105.22    6.45
 -10  -4   5   33.20    1.72
  10  -4  -5   31.02    1.75
 -10  -4   5   32.75    1.75
 -10   4   5   30.76    2.22
  10   4  -5   33.77    1.97
   8  -4  -5   35.34    1.93
  -8  -4   5   37.09    2.86
  -8  -4   5   37.55    3.17
   8   4  -5   35.57    2.84
  -8   4   5   33.67    1.56
  -8   4   5   33.24    2.59
  -6  -4   5  242.85    7.82
   6  -4  -5  233.75   10.13
  -6   4   5  229.79   14.54
  -6   4   5  229.67   17.26
   6   4  -5  230.90    7.24
  -6   4   5  234.73    8.30
  -4  -4   5  113.30    3.40
   4  -4  -5  105.63    8.77
  -4  -4   5  112.16    2.72
  -4   4   5  107.45    4.57
  -4   4   5  110.38    4.46
  -4   4   5  118.08    8.57
  -2  -4   5  182.68    5.89
  -2  -4   5  170.78   13.96
  -2  -4   5  185.48    7.26
   2  -4  -5  166.39    6.68
  -2   4   5  178.32    6.19
  -2   4   5  177.54    6.62
  -2   4   5  178.24    8.78
   0  -4   5   37.53    1.24
   0  -4  -5   36.40    2.85
   0  -4   5   37.77    1.60
   0   4   5   38.50    2.19
   0   4   5   36.12    1.95
   0   4   5   40.07    1.55
  -2  -4  -5   76.50    2.65
   2  -4   5   82.00    3.53
  -2  -4  -5   79.65    3.45
   2   4   5   80.86    2.34
   2   4   5   82.84    3.73
   4  -4   5  270.92    8.35
  -4  -4  -5  262.59   10.48
   4   4   5  283.76    7.69
   4   4   5  274.62   14.17
   6  -4   5    0.71    0.48
   6   4   5    0.55    0.48
  -6   4  -5    0.27    0.41
   8  -4   5    2.93    0.53
  -8  -4  -5    4.04    0.70
   8   4   5    3.66    0.46
  -8   4  -5    3.96    0.78
   8   4   5    2.98    0.57
 -10  -4  -5   97.65    5.54
  10  -4   5  101.68    8.48
 -10   4  -5  110.35    5.05
  10   4   5  105.02    8.29
  12  -4   5    6.68    1.04
 -12  -4  -5    7.82    0.85
  12   4   5    5.55    0.97
 -12   4  -5    7.59    1.00
 -15  -5   5    0.20    0.36
  15  -5  -5    0.44    0.48
 -15   5   5   -0.24    0.40
  15   5  -5   -0.29    0.33
 -13  -5   5    0.95    0.36
  13   5  -5    0.97    0.57
 -11  -5   5    9.47    0.91
 -11  -5   5    8.28    0.85
  11  -5  -5    7.89    0.62
 -11   5   5    8.13    0.77
  11   5  -5    6.70    0.83
  -9  -5   5    9.02    0.75
   9  -5  -5    7.52    0.54
  -9  -5   5    7.79    0.56
  -9   5   5    7.34    0.61
   9   5  -5    5.88    0.61
   7  -5  -5    2.14    0.42
  -7  -5   5    2.48    0.37
  -7   5   5    2.57    0.38
  -7   5   5    2.17    0.28
   7   5  -5    1.96    0.37
  -7   5   5    2.56    0.24
   5  -5  -5   11.46    0.62
  -5  -5   5   14.15    0.69
  -5   5   5   12.24    0.71
   5   5  -5   13.86    0.77
  -5   5   5   10.62    0.82
   3  -5  -5    6.58    0.36
  -3  -5   5    7.71    0.55
  -3  -5   5    7.74    0.43
  -3   5   5    7.34    0.37
  -3   5   5    6.56    0.53
  -3   5   5    6.18    0.35
  -1  -5   5   19.77    0.91
  -1  -5   5   20.45    0.83
   1  -5  -5   17.08    1.23
  -1   5   5   18.59    1.33
  -1   5   5   20.48    0.91
  -1   5   5   18.61    0.78
  -1  -5  -5   17.48    0.57
   1  -5   5   19.46    0.91
   1   5   5   16.90    0.84
   1   5   5   19.11    0.90
  -3  -5  -5    6.64    0.56
  -3  -5  -5    5.39    0.57
   3  -5   5    7.31    0.54
   3   5   5    8.04    0.58
   3   5   5    6.39    0.55
  -5  -5  -5    5.47    0.59
   5  -5   5    4.43    0.66
   5   5   5    6.69    0.66
   5   5   5    6.54    0.56
  -5   5  -5    6.01    0.44
  -7  -5  -5   -0.21    0.30
   7  -5   5   -0.05    0.31
   7   5   5    0.17    0.32
  -7   5  -5    0.97    0.47
   7   5   5   -0.22    0.29
  -9  -5  -5    0.59    0.41
   9  -5   5    0.04    0.39
   9   5   5    0.08    0.53
  -9   5  -5    0.45    0.44
  11  -5   5    0.46    0.60
 -11   5  -5    2.27    0.82
 -14  -6   5    0.36    0.60
  14  -6  -5    0.04    0.30
 -14   6   5   -0.33    0.27
  14   6  -5   -0.68    0.49
 -12  -6   5   21.86    1.76
 -12  -6   5   17.68    2.10
  12  -6  -5   19.28    1.99
  12   6  -5   19.09    1.63
 -12   6   5   21.28    1.30
 -10  -6   5    1.27    0.38
  10  -6  -5    1.62    0.38
 -10   6   5    1.33    0.32
  -8  -6   5    5.77    0.35
  -8  -6   5    6.16    0.48
  -8   6   5    7.63    0.73
  -8   6   5    6.28    0.36
  -8   6   5    5.46    0.70
   8   6  -5    4.95    0.46
   6  -6  -5   51.73    3.17
  -6  -6   5   48.22    2.29
  -6   6   5   48.20    3.11
   6   6  -5   50.79    1.84
  -6   6   5   50.22    3.89
  -6   6   5   51.67    2.27
  -6   6   5   46.80    2.69
  -4  -6   5    9.28    0.58
   4  -6  -5    9.96    0.65
  -4   6   5   10.63    0.85
  -4   6   5    9.61    0.51
  -4   6   5   10.54    0.66
  -2  -6   5   40.09    2.35
  -2  -6   5   41.64    1.64
   2  -6  -5   42.71    1.85
  -2   6   5   46.13    2.51
  -2   6   5   47.83    1.90
  -2   6   5   43.80    1.93
   0  -6   5   21.38    1.03
   0  -6   5   21.89    1.40
   0  -6  -5   22.06    0.94
   0   6   5   23.54    1.04
   0   6   5   22.60    1.51
   0   6   5   22.06    1.29
   2  -6   5   13.48    0.80
  -2  -6  -5   13.71    0.55
  -2  -6  -5   14.87    0.82
   2   6   5   13.75    1.08
   2   6   5   15.82    0.84
   4  -6   5   66.84    2.75
  -4  -6  -5   75.66    4.61
   4   6   5   78.33    3.11
   4   6   5   75.98    3.21
   6  -6   5    0.49    0.37
  -6  -6  -5   -0.03    0.26
  -6   6  -5    0.22    0.29
   6   6   5    0.02    0.25
   6   6   5    0.41    0.34
   8  -6   5    1.76    0.64
  -8   6  -5    1.21    0.77
   8   6   5    1.82    0.48
   8   6   5    2.79    0.56
  10  -6   5   12.56    1.50
 -10  -6  -5   18.15    1.57
 -10   6  -5   12.13    1.52
  10   6   5   17.05    1.32
 -12  -6  -5    3.27    0.56
  12   6   5    3.66    0.74
  15  -7  -5    1.87    0.59
  15   7  -5    2.07    0.55
 -13  -7   5    1.44    0.51
  13  -7  -5    1.23    0.32
 -13   7   5    2.16    0.47
 -11  -7   5   23.25    1.36
  11  -7  -5   24.45    1.75
 -11  -7   5   24.22    1.62
 -11   7   5   19.66    2.12
  11   7  -5   22.27    1.46
   9  -7  -5    0.74    0.34
  -9  -7   5    1.10    0.26
  -9  -7   5    1.19    0.43
  -9   7   5    0.78    0.18
   9   7  -5    2.58    1.90
  -7  -7   5    1.17    0.39
   7  -7  -5    1.02    0.29
  -7   7   5    1.24    0.35
   7   7  -5    1.55    0.64
  -7   7   5    0.84    0.15
  -7   7   5    0.54    0.18
  -7   7   5    0.80    0.12
  -5  -7   5   28.52    1.07
   5  -7  -5   29.10    1.85
   5   7  -5   28.56    1.08
  -5   7   5   32.59    1.22
  -5   7   5   28.52    1.50
   3  -7  -5   34.71    1.39
  -3  -7   5   34.84    1.80
  -3  -7   5   35.52    1.16
  -3   7   5   46.31   15.35
  -3   7   5   37.56    4.24
  -3   7   5   35.38    1.48
  -1  -7   5   23.77    1.19
   1  -7  -5   20.66    0.62
  -1  -7   5   23.18    0.81
  -1   7   5   21.42    0.98
  -1   7   5   19.91    0.74
  -1   7   5   20.29    1.20
  -1  -7  -5   27.41    2.21
  -1  -7  -5   30.24    1.44
   1  -7   5   25.09    1.17
  -1  -7  -5   28.33    1.36
   1  -7   5   26.66    1.27
   1   7   5   31.58    1.55
   1   7   5   29.24    1.34
  -3  -7  -5    9.17    0.58
   3  -7   5    9.10    0.64
  -3  -7  -5    9.77    0.80
   3   7   5    9.44    0.56
   3   7   5    9.90    0.66
  -5  -7  -5    7.59    0.64
   5  -7   5    7.97    1.83
   5   7   5    7.55    0.88
   5   7   5    6.83    0.68
  -7  -7  -5   13.25    1.12
   7  -7   5   12.46    1.10
  -7   7  -5   13.23    1.05
   7   7   5   12.52    0.89
   7   7   5   15.04    1.02
  -9  -7  -5    7.97    0.87
   9   7   5    8.70    0.78
  -9   7  -5    6.96    0.87
   9   7   5    7.99    0.68
  11  -7   5    5.84    0.96
 -11   7  -5    6.09    1.00
  11   7   5    6.58    0.99
  14  -8  -5    0.12    0.45
 -14  -8   5    1.16    0.60
  14   8  -5   -0.76    0.52
 -12  -8   5   35.45    1.85
  12  -8  -5   27.93    2.87
 -12  -8   5   33.77    2.03
 -12   8   5   29.47    2.22
  12   8  -5   29.75    2.62
  10  -8  -5   22.68    1.46
 -10  -8   5   25.26    1.58
 -10  -8   5   24.29    1.29
 -10   8   5   22.55    2.69
  10   8  -5   26.82    1.42
   8  -8  -5   21.96    1.00
  -8  -8   5   21.61    1.43
  -8   8   5   20.01    1.86
  -8   8   5   20.21    1.21
   8   8  -5   20.79    1.05
  -6  -8   5   59.31    2.40
   6  -8  -5   54.14    3.40
   6   8  -5   61.89    2.00
  -6   8   5   59.37    2.00
  -6   8   5   52.24    3.06
   4  -8  -5  123.17    7.85
  -4  -8   5  127.61    3.98
  -4  -8   5  133.98    3.35
  -4   8   5  127.47    5.53
  -4   8   5  130.70    4.41
  -4   8   5  121.36    5.69
  -2  -8   5   64.56    1.88
  -2  -8   5   64.47    2.59
   2  -8  -5   55.31    2.45
  -2   8   5   57.06    2.44
   0  -8  -5   16.68    0.82
   0  -8   5   18.11    0.75
   0  -8   5   18.33    0.74
   0   8   5   17.92    0.86
   0   8   5   15.72    1.05
   0   8   5   16.14    0.81
  -2  -8  -5   84.19    3.80
   2  -8   5   87.41    3.18
  -2  -8  -5   82.70    5.70
   2   8   5   83.25    4.52
   2   8   5   87.29    3.18
  -4  -8  -5  108.41    7.48
   4  -8   5  119.93    4.06
  -4  -8  -5  113.19    5.65
   4   8   5  116.24    5.56
   4   8   5  120.55    4.72
   6  -8   5   -0.38    0.36
  -6  -8  -5    0.32    0.48
   6   8   5    0.63    0.33
   6   8   5    0.15    0.22
  -6   8  -5    0.02    0.30
   8  -8   5    5.83    0.67
  -8  -8  -5    6.88    0.76
   8   8   5    4.90    0.68
   8   8   5    4.75    0.66
  -8   8  -5    6.80    0.92
 -10  -8  -5   30.95    2.11
  10  -8   5   37.89    3.27
 -10   8  -5   39.49    2.60
  10   8   5   36.83    2.43
  12  -8   5    5.71    0.70
 -12   8  -5    5.22    0.90
 -15  -9   5   19.95    2.04
  15   9  -5   17.29    1.90
 -13  -9   5   39.06    3.25
  13  -9  -5   35.02    3.74
 -13   9   5   32.01    3.68
  13   9  -5   34.50    2.41
  11  -9  -5   17.09    1.48
 -11  -9   5   18.28    1.09
 -11  -9   5   18.04    1.78
 -11   9   5   16.08    1.62
  11   9  -5   18.08    1.31
  -9  -9   5   32.50    1.67
   9  -9  -5   33.32    2.66
   9   9  -5   32.15    1.26
  -9   9   5   28.64    3.99
  -7  -9   5  211.56    6.24
   7  -9  -5  201.68   10.42
   7   9  -5  200.98    7.19
  -7   9   5  189.31    9.15
   5  -9  -5    5.23    0.40
  -5  -9   5    4.87    0.47
  -5   9   5    5.65    0.31
  -5   9   5    5.65    0.69
  -5   9   5    4.51    0.26
   5   9  -5    6.23    0.52
  -3  -9   5   26.75    1.00
   3  -9  -5   25.92    1.38
  -3  -9   5   26.09    1.04
  -3   9   5   27.13    1.51
  -1  -9   5  344.80    8.25
  -1  -9   5  339.54   12.24
  -1   9   5  332.37   13.19
   1  -9   5   92.51    3.06
   1  -9   5   94.99    4.17
  -1  -9  -5   90.89    2.44
  -1  -9  -5   84.57    5.55
  -1  -9  -5   84.67    4.02
   1   9   5   87.79    5.00
   1   9   5   91.22    3.20
   3  -9   5   16.34    1.11
  -3  -9  -5   16.43    1.07
  -3  -9  -5   19.56    0.87
   3   9   5   17.78    0.76
   3   9   5   17.38    0.96
  -5  -9  -5  174.44    8.83
   5  -9   5  177.57    7.96
   5   9   5  177.06    9.80
   5   9   5  175.01    7.63
   7  -9   5   64.71    3.27
  -7  -9  -5   64.27    3.43
  -7   9  -5   70.02    3.56
   7   9   5   62.53    3.08
   7   9   5   62.88    3.84
   9  -9   5   35.85    2.89
  -9  -9  -5   37.97    2.39
   9   9   5   38.40    3.08
  -9   9  -5   37.55    2.65
  11  -9   5    6.63    0.91
 -11  -9  -5    8.12    0.87
 -11   9  -5    5.46    0.92
  11   9   5    5.86    0.88
 -14 -10   5    7.27    0.82
 -12 -10   5    8.81    0.95
  12 -10  -5    9.32    1.02
 -12 -10   5    9.01    0.79
  12  10  -5    8.39    1.01
 -12  10   5    8.84    1.31
  10 -10  -5    5.07    0.43
 -10 -10   5    4.70    0.64
  10  10  -5    5.07    0.49
 -10  10   5    5.86    0.46
   8 -10  -5    5.37    0.57
  -8 -10   5    4.44    0.60
   8  10  -5    5.16    0.51
  -8  10   5    4.66    0.64
  -6 -10   5    4.50    0.52
   6 -10  -5    3.65    0.24
  -6  10   5    3.35    0.25
  -4 -10   5    1.86    0.39
   4 -10  -5    2.09    0.18
  -4  10   5    2.76    0.51
   2 -10  -5    6.15    0.23
  -2 -10   5    5.69    0.52
  -2 -10   5    7.35    0.44
   0 -10  -5   23.25    1.43
   0 -10   5   24.55    1.08
   0 -10   5   25.52    1.51
   0 -10  -5   25.42    1.25
   0  10   5   24.05    1.07
   0  10   5   24.37    1.30
  -2 -10  -5   26.07    1.96
   2 -10   5   26.44    1.17
  -2 -10  -5   27.70    1.31
   2 -10   5   26.76    0.98
   2  10   5   25.26    0.96
   2  10   5   25.87    1.64
   4 -10   5    2.98    1.55
  -4 -10  -5    2.84    0.45
   4  10   5    2.80    0.41
   4  10   5    3.22    0.55
   6 -10   5   14.43    0.91
  -6 -10  -5   14.57    1.04
  -6  10  -5   15.12    0.97
   6  10   5   16.57    1.15
   6  10   5   14.91    1.34
   8 -10   5   10.18    1.06
  -8 -10  -5   11.86    0.74
   8  10   5   11.18    0.90
 -10 -10  -5    9.13    0.96
  10 -10   5    8.19    1.06
  10  10   5   10.34    0.97
 -13 -11   5    0.15    0.48
  13  11  -5    0.14    0.61
 -11 -11   5    0.83    0.27
 -11 -11   5    0.44    0.47
  11  11  -5    1.36    0.45
   7 -11  -5    0.57    0.18
  -7 -11   5    1.05    0.35
   7  11  -5    0.47    0.37
  -7  11   5    0.55    0.13
   5 -11  -5    3.83    0.32
  -5 -11   5    4.19    0.41
  -3 -11   5    0.45    0.41
  -3 -11   5    0.13    0.41
   3 -11  -5    0.15    0.05
  -3  11   5   -0.03    0.35
   1 -11  -5    0.94    0.14
   1 -11  -5    0.93    0.11
  -1  11   5    1.31    0.49
   1 -11   5    0.09    0.36
  -1 -11  -5    0.13    0.10
  -1 -11  -5    0.10    0.13
   1  11   5    0.70    0.36
   3 -11   5    0.54    0.59
  -3 -11  -5    0.30    0.24
  -3 -11  -5    0.15    0.14
   3  11   5    0.32    0.34
   3  11   5    0.06    0.14
  -5 -11  -5    1.27    0.42
   5 -11   5    1.81    0.57
   5  11   5    1.70    0.49
   5  11   5    2.29    0.49
  -7 -11  -5    0.51    0.44
   7 -11   5    1.10    0.34
   7  11   5    0.84    0.27
  -7  11  -5    0.26    0.52
   9 -11   5    0.51    0.38
  -9 -11  -5    0.45    0.52
  -9  11  -5    1.32    0.55
   9  11   5    0.73    0.40
 -11 -11  -5    0.78    0.67
  11 -11   5    1.22    0.54
 -11  11  -5    0.47    0.59
 -14 -12   5    0.34    0.37
  14  12  -5    0.53    0.71
 -12 -12   5   11.92    1.09
  12  12  -5   13.97    1.29
  10 -12  -5   16.53    1.66
 -10 -12   5   16.24    1.36
  10  12  -5   12.76    1.07
   8 -12  -5    1.92    0.32
   8  12  -5    2.87    0.73
  -6 -12   5   18.51    0.68
   6 -12  -5   19.34    1.03
  -6  12   5   20.37    1.12
   6  12  -5   20.81    1.01
   4 -12  -5    5.74    0.38
  -4 -12   5    6.41    0.50
   2 -12  -5    0.36    0.04
  -2 -12   5    0.11    0.35
  -2 -12   5    0.52    0.31
  -2  12   5    0.51    0.49
   0 -12  -5   44.42    2.56
   0 -12   5   44.59    1.36
   0 -12   5   45.09    1.59
   0 -12  -5   42.20    2.26
   0  12   5   44.87    2.60
  -2 -12  -5    8.19    0.48
  -2 -12  -5    5.86    0.51
   2 -12   5    5.76    0.57
   2 -12   5    6.32    0.58
   2  12   5    8.21    0.72
   2  12   5    7.49    0.58
  -4 -12  -5   26.47    1.65
   4 -12   5   30.20    1.59
   4  12   5   28.77    1.86
   4  12   5   27.83    1.56
  -6 -12  -5    5.35    0.73
   6 -12   5    6.46    0.59
   6  12   5    5.93    0.60
  -6  12  -5    6.32    0.67
  -8 -12  -5   11.53    0.94
   8 -12   5   10.34    1.10
   8  12   5    8.96    0.70
  -8  12  -5   11.93    0.94
 -10 -12  -5   10.86    1.17
  10 -12   5    9.67    1.41
 -10  12  -5   11.77    1.13
  10  12   5    9.46    1.09
 -13 -13   5   37.84    3.64
  13  13  -5   38.34    2.72
 -11 -13   5    4.81    0.62
  11  13  -5    3.69    0.73
  -9 -13   5   25.33    1.05
   9 -13  -5   21.25    2.39
   9  13  -5   26.30    1.38
   7 -13  -5  209.81   18.56
  -7 -13   5  214.44    8.60
  -7  13   5  209.38   11.60
   7  13  -5  208.35    8.05
  -5 -13   5    5.52    0.54
  -5 -13   5    4.90    0.48
  -3 -13   5    0.84    0.27
  -3 -13   5    1.19    0.26
   1 -13  -5  220.65    6.55
   1 -13  -5  214.38    5.57
  -1 -13   5  218.31    6.34
  -1 -13   5  217.00    6.69
   1 -13   5   37.20    2.20
  -1 -13  -5   38.43    2.21
   1 -13   5   37.47    1.70
   1  13   5   36.87    1.86
   1  13   5   39.69    1.61
   3 -13   5   18.63    0.99
  -3 -13  -5   16.70    0.91
   3 -13   5   16.82    0.98
   3  13   5   17.73    1.04
   5 -13   5  106.08    4.61
  -5 -13  -5  113.85    3.84
   5  13   5  101.43    6.94
  -7 -13  -5   31.04    1.28
   7 -13   5   32.05    1.78
  -7  13  -5   35.38    2.07
   7  13   5   32.18    2.54
  -9 -13  -5   17.75    1.47
   9 -13   5   18.25    1.25
   9  13   5   15.49    1.14
  -9  13  -5   20.66    1.30
  11 -13   5   13.71    1.41
 -11 -13  -5   13.40    1.21
  11  13   5   12.34    1.27
 -11  13  -5   15.61    1.48
 -14 -14   5    2.94    0.78
 -12 -14   5   38.00    2.46
  12  14  -5   34.90    1.99
 -10 -14   5   45.08    2.78
  10  14  -5   41.88    2.33
   8 -14  -5   17.81    1.76
  -8 -14   5   16.65    1.08
   8  14  -5   18.26    1.13
  -6 -14   5   73.91    2.70
   6  14  -5   71.39    2.51
  -4 -14   5  201.14    5.74
  -4 -14   5  199.01    5.97
  -2 -14   5   39.51    1.97
  -2 -14   5   39.42    1.63
   0 -14  -5    4.72    0.25
   0 -14   5    3.31    0.46
   0 -14   5    3.88    0.60
  -2 -14  -5   62.56    3.17
   2 -14   5   64.03    2.13
   2 -14   5   65.28    2.69
   2  14   5   64.30    3.39
   4 -14   5   91.48    5.00
  -4 -14  -5  104.28    3.98
   4  14   5   93.43    6.40
  -6 -14  -5    3.84    0.44
   6 -14   5    3.41    0.75
   6  14   5    3.26    0.36
  -8 -14  -5    6.30    0.48
   8 -14   5    5.52    0.78
  -8  14  -5    6.67    0.85
   8  14   5    7.61    0.68
  10 -14   5   37.22    3.03
 -10 -14  -5   36.89    2.99
 -10  14  -5   40.62    2.51
  10  14   5   36.17    4.54
 -13 -15   5    0.85    0.65
  13  15  -5    0.75    0.62
 -11 -15   5   12.19    0.95
  11  15  -5   12.47    1.09
  -9 -15   5    8.83    0.82
   9  15  -5   11.44    0.92
  -7 -15   5    0.87    0.39
   7  15  -5    0.91    0.38
  -5 -15   5   36.43    1.53
  -5 -15   5   33.21    1.33
  -3 -15   5   20.34    1.19
  -3 -15   5   19.02    0.99
   1 -15  -5   20.04    0.55
   1 -15  -5   17.21    0.36
  -1 -15   5   18.58    1.06
  -1 -15   5   20.19    1.24
  -1 -15  -5   37.79    2.02
   1 -15   5   41.42    1.90
   1 -15   5   40.63    1.78
   3 -15   5    4.35    0.51
  -3 -15  -5    4.04    0.35
   3  15   5    3.89    0.28
   5 -15   5    4.76    0.81
  -5 -15  -5    5.83    0.59
   5  15   5    5.94    0.59
  -7 -15  -5    7.03    0.67
   7 -15   5    8.46    1.00
  -7  15  -5    7.07    0.92
   7  15   5    6.39    0.60
  -9 -15  -5    3.15    0.59
   9  15   5    2.53    0.58
  -9  15  -5    3.07    0.63
 -11 -15  -5    3.58    0.67
  11 -15   5    2.44    0.58
 -11  15  -5    2.12    0.66
 -14 -16   5    0.16    0.35
  14  16  -5    1.29    0.84
 -12 -16   5   24.66    1.42
  12  16  -5   24.83    2.29
  10  16  -5    1.50    0.52
  -8 -16   5   13.77    0.87
   8  16  -5   14.10    0.93
  -6 -16   5   64.46    3.27
   6  16  -5   59.09    3.09
  -4 -16   5    3.23    0.62
  -4 -16   5    5.08    0.64
  -2 -16   5   36.94    2.29
  -2 -16   5   39.88    1.60
   0 -16  -5    2.85    0.20
   0 -16   5    3.32    0.57
   0 -16   5    2.61    0.50
   2 -16   5    2.07    0.58
  -2 -16  -5    1.42    0.20
   2  16   5    1.39    0.15
  -4 -16  -5   59.92    4.11
   4 -16   5   61.34    4.17
   4  16   5   57.41    5.21
   6 -16   5    1.36    0.57
  -6 -16  -5    1.13    0.35
  -8 -16  -5    1.27    0.47
   8  16   5    0.87    0.33
  -8  16  -5    1.48    0.72
  10 -16   5    9.36    1.39
  10  16   5    8.88    1.12
 -10  16  -5   11.71    1.23
 -13 -17   5   -0.97    0.56
  13  17  -5   -0.69    0.60
 -11 -17   5   10.05    0.86
  11  17  -5   10.74    0.88
  -9 -17   5    3.61    0.64
  -7 -17   5   15.78    1.02
   7  17  -5   18.98    1.08
  -5 -17   5   10.83    0.81
  -5 -17   5   11.47    0.74
  -3 -17   5    4.46    0.62
  -3 -17   5    3.18    0.55
  -1 -17   5   19.07    1.07
  -1 -17   5   19.18    1.04
   1 -17   5   -0.28    0.43
   1 -17   5    0.88    0.32
  -1 -17  -5    0.44    0.11
   3 -17   5    7.65    1.71
  -3 -17  -5    4.08    0.43
   3 -17   5    6.43    1.24
   3  17   5    5.00    0.41
   5 -17   5    3.50    0.52
  -5 -17  -5    3.24    0.27
   5  17   5    3.85    0.56
   7 -17   5    2.05    0.67
  -7 -17  -5    2.30    0.34
   7  17   5    1.66    0.28
  -7  17  -5    1.87    0.44
  -9 -17  -5    1.21    0.40
   9 -17   5    0.87    0.53
   9  17   5    1.29    0.51
  -9  17  -5    1.45    0.79
 -12 -18   5   41.37    3.24
  12  18  -5   43.21    2.93
 -10 -18   5   11.63    1.17
  10  18  -5   12.41    1.22
  -8 -18   5   19.51    1.25
   8  18  -5   15.88    1.16
  -6 -18   5   94.54    4.16
  -4 -18   5   30.48    1.44
  -4 -18   5   31.20    1.48
  -2 -18   5  113.56    4.18
  -2 -18   5  106.52    4.33
   0 -18   5   38.79    1.65
   0 -18   5   39.28    2.08
   2 -18   5   54.35    2.92
   2 -18   5   49.28    2.10
  -2 -18  -5   53.63    2.56
   2  18   5   50.17    3.79
   4 -18   5  136.84    6.54
   4 -18   5  136.97    5.97
  -4 -18  -5  138.30    9.67
   4  18   5  137.58    8.50
  -6 -18  -5    0.95    0.33
   6 -18   5    0.77    0.40
   6  18   5    0.59    0.22
  -8 -18  -5    1.78    0.40
   8 -18   5    1.87    0.76
  -8  18  -5    2.20    0.57
   8  18   5    2.50    0.46
 -10 -18  -5   62.45    4.04
  10 -18   5   58.56    3.21
 -10  18  -5   65.18    5.30
  10  18   5   61.23    4.48
 -13 -19   5    1.04    0.58
  13  19  -5    1.61    0.47
 -11 -19   5    0.82    0.66
  11  19  -5    1.06    0.63
  -9 -19   5   24.57    1.91
   9  19  -5   27.38    1.56
  -7 -19   5    9.54    1.08
   7  19  -5   11.67    1.00
  -5 -19   5   16.76    1.20
  -5 -19   5   16.29    1.10
  -3 -19   5   16.29    0.96
  -3 -19   5   11.79    0.77
  -1 -19   5   45.09    2.08
  -1 -19   5   47.66    2.13
   1 -19   5   75.53    8.07
   1 -19   5   69.85    3.57
  -3 -19  -5    2.39    0.30
   3 -19   5    2.58    0.45
   3 -19   5    2.62    0.54
   3  19   5    2.47    0.26
   5 -19   5   10.22    0.85
  -5 -19  -5   10.97    0.84
   5  19   5    8.97    0.97
   7 -19   5   33.67    2.26
  -7 -19  -5   41.36    2.61
   7  19   5   36.74    3.59
  -7  19  -5   38.57    2.23
   9 -19   5    3.57    0.55
  -9 -19  -5    4.85    0.53
   9  19   5    3.34    0.63
  -9  19  -5    4.08    0.64
 -12 -20   5    0.41    0.50
  12  20  -5   -0.23    0.54
 -10 -20   5   13.16    1.55
  10  20  -5   10.50    0.89
  -8 -20   5    2.07    0.53
   8  20  -5    2.25    0.69
  -6 -20   5    5.22    0.76
  -4 -20   5   39.99    2.34
  -4 -20   5   42.01    1.65
  -2 -20   5    0.37    0.54
  -2 -20   5    1.15    0.64
   0 -20   5    1.61    0.40
   2 -20   5   27.75    1.56
   2 -20   5   28.12    1.60
  -4 -20  -5    1.31    0.25
   4 -20   5    0.83    0.41
   4  20   5    1.21    0.23
   6 -20   5    2.91    0.46
  -6 -20  -5    2.98    0.37
   6  20   5    2.25    0.25
   8 -20   5    1.63    0.45
  -8 -20  -5    1.29    0.31
  -8  20  -5    1.09    0.46
 -11 -21   5    5.40    0.93
  11  21  -5    3.65    0.68
  -9 -21   5   16.05    1.40
   9  21  -5   15.64    1.16
  -7 -21   5  102.03    6.09
  -5 -21   5    1.90    0.39
  -5 -21   5    2.21    0.41
  -3 -21   5    0.75    0.48
  -3 -21   5   -0.15    0.39
  -1 -21   5  162.61    6.26
  -1 -21   5  170.97    6.79
   1 -21   5   30.63    1.35
   1 -21   5   26.61    1.46
   3 -21   5    0.90    0.46
   5 -21   5   67.83    3.13
  -5 -21  -5   61.35    5.56
   7 -21   5   11.47    1.12
  -7 -21  -5   10.09    0.90
  -7  21  -5   14.29    1.64
  -9 -21  -5   32.62    1.69
   9 -21   5   30.75    2.78
  -9  21  -5   32.47    3.32
 -12 -22   5    0.08    0.39
  12  22  -5    0.36    0.43
 -10 -22   5    0.37    0.68
  10  22  -5    0.50    0.45
  -8 -22   5    4.38    0.58
   8  22  -5    4.47    0.61
  -6 -22   5    4.78    0.87
  -6 -22   5    6.58    0.77
  -4 -22   5    8.00    0.57
  -4 -22   5    9.44    0.77
  -2 -22   5    0.38    0.60
  -2 -22   5   -0.05    0.34
   0 -22   5    1.47    0.55
   2 -22   5   14.90    1.26
   2 -22   5   15.31    1.33
   4 -22   5    3.24    0.74
   4 -22   5    2.55    0.64
   6 -22   5    3.46    0.88
  -8 -22  -5    0.39    0.49
   8 -22   5   -0.18    0.61
  -8  22  -5    0.69    0.68
 -11 -23   5    0.76    0.49
  11  23  -5    0.87    0.38
  -9 -23   5   11.00    0.95
   9  23  -5   10.06    1.00
  -7 -23   5   76.32    4.77
  -5 -23   5    0.77    0.62
  -3 -23   5    0.15    0.62
  -3 -23   5    0.95    0.45
  -1 -23   5   95.57    4.04
  -1 -23   5   96.32    4.97
   1 -23   5    9.04    1.20
   1 -23   5    6.97    0.79
   3 -23   5    3.11    0.49
   3 -23   5    4.20    0.92
   5 -23   5   35.58    2.73
   7 -23   5    9.17    0.90
  -7  23  -5   10.74    0.96
 -10 -24   5   25.10    1.97
  10  24  -5   21.60    2.09
  -8 -24   5    0.61    0.41
   8  24  -5    0.76    0.46
  -6 -24   5    2.16    0.43
  -6 -24   5    1.63    0.38
  -4 -24   5   43.19    2.31
  -4 -24   5   43.67    2.02
  -2 -24   5    1.50    0.36
  -2 -24   5    0.91    0.53
   0 -24   5   15.68    1.04
   0 -24   5   13.64    1.18
   2 -24   5   17.84    1.24
   2 -24   5   15.16    1.20
   6 -24   5    7.05    0.90
   8 -24   5   11.90    1.39
  -8  24  -5   11.16    1.16
 -11 -25   5    1.44    0.64
  11  25  -5    1.94    0.52
  -9 -25   5    1.83    0.54
   9  25  -5    1.57    0.68
  -7 -25   5   21.97    1.61
  -7 -25   5   23.60    1.41
  -5 -25   5   10.48    1.09
  -5 -25   5   11.65    0.99
  -3 -25   5    2.94    0.50
  -3 -25   5    2.53    0.68
  -1 -25   5    8.90    0.83
  -1 -25   5    8.21    0.87
   1 -25   5    9.42    1.08
   1 -25   5   10.86    0.87
   3 -25   5    3.88    0.84
   5 -25   5    8.92    1.10
   5 -25   5    7.14    0.73
   7 -25   5    8.21    1.17
  -7  25  -5   10.24    1.04
 -10 -26   5    9.13    1.40
  10  26  -5    9.67    1.37
  -8 -26   5   15.75    1.36
  -6 -26   5   89.94    3.86
  -6 -26   5   83.30    4.55
  -4 -26   5   61.95    3.12
  -4 -26   5   69.36    4.18
  -2 -26   5   53.04    2.08
  -2 -26   5   54.73    3.23
   0 -26   5   16.94    1.18
   0 -26   5   17.61    1.39
   2 -26   5   16.71    1.02
   2 -26   5   15.01    1.16
   4 -26   5  135.78    8.34
   4 -26   5  128.56    7.92
   6 -26   5    0.21    0.40
  -9 -27   5   17.31    1.78
  -7 -27   5   -0.34    0.39
  -7 -27   5    0.06    0.49
  -5 -27   5    2.44    0.74
  -5 -27   5    2.34    0.44
  -3 -27   5   13.09    1.12
  -3 -27   5   13.85    1.38
  -1 -27   5    1.63    0.61
  -1 -27   5    2.39    0.52
   1 -27   5   23.26    1.48
   1 -27   5   23.74    1.58
   5 -27   5    0.47    0.57
   5 -27   5   -0.61    0.71
   7 -27   5    3.66    0.74
  -7  27  -5    4.23    0.96
 -10 -28   5   -0.41    0.47
  10  28  -5    1.15    0.48
  -8 -28   5    2.48    0.50
  -8 -28   5    2.97    0.75
  -6 -28   5    3.32    0.60
  -4 -28   5    6.41    0.71
  -4 -28   5    6.61    0.86
  -2 -28   5    8.39    0.79
  -2 -28   5    9.52    1.02
   0 -28   5    8.06    0.97
   0 -28   5    7.62    0.73
   2 -28   5    0.26    0.69
   2 -28   5    1.70    0.67
   4 -28   5   12.38    1.06
   4 -28   5   12.83    1.19
   6 -28   5    1.01    0.55
  -9 -29   5    1.37    0.71
  -9 -29   5    1.89    0.53
  -7 -29   5    3.45    0.58
  -5 -29   5    8.92    0.95
  -5 -29   5   10.28    1.04
  -3 -29   5    0.61    0.49
  -3 -29   5    1.53    0.62
  -1 -29   5    3.27    0.59
  -1 -29   5    4.11    0.89
   1 -29   5    5.82    0.75
   3 -29   5   11.57    1.20
   3 -29   5   12.94    1.31
   5 -29   5    5.19    0.86
   5 -29   5    5.59    1.00
  -8 -30   5    6.22    0.69
  -6 -30   5    9.01    0.93
  -6 -30   5    6.01    0.83
  -4 -30   5   13.46    1.36
  -4 -30   5   13.25    1.17
  -2 -30   5   28.22    1.87
  -2 -30   5   26.03    1.96
   0 -30   5    6.78    0.76
   0 -30   5    5.21    0.84
   2 -30   5   11.26    1.16
   2 -30   5   12.55    0.98
   4 -30   5   18.56    1.75
   4 -30   5   20.33    1.67
  -7 -31   5   55.44    3.99
  -7 -31   5   45.40    4.02
  -5 -31   5    3.72    0.71
  -3 -31   5    5.51    0.55
  -3 -31   5    5.81    0.82
  -1 -31   5   90.93    5.16
  -1 -31   5   83.93    6.84
   1 -31   5   23.58    1.92
   1 -31   5   25.43    1.68
   3 -31   5    1.89    0.49
   5 -31   5   42.68    3.15
   5 -31   5   42.43    3.14
  -6 -32   5    2.01    0.75
  -6 -32   5   -0.04    0.62
  -4 -32   5    7.60    0.80
  -2 -32   5    1.26    0.42
  -2 -32   5    0.96    0.51
   0 -32   5    3.72    0.63
   2 -32   5   10.39    1.37
   2 -32   5   14.23    1.33
   4 -32   5   -0.14    0.76
   4 -32   5    0.37    0.46
  -5 -33   5    1.94    0.78
  -5 -33   5    1.23    0.71
  -3 -33   5   -0.31    0.73
  -3 -33   5   -0.07    0.47
  -1 -33   5    0.62    0.47
  -1 -33   5    0.59    1.41
   1 -33   5    0.93    0.44
   1 -33   5    0.24    0.67
   3 -33   5    1.19    0.72
   3 -33   5    0.95    0.42
  -4 -34   5    1.65    0.51
  -4 -34   5    1.16    0.71
  -2 -34   5    0.57    0.47
  -2 -34   5    0.69    0.55
   0 -34   5    3.36    0.81
   2 -34   5    0.52    0.73
  -3 -35   5    1.79    0.50
  -1 -35   5   36.23    3.57
  -1 -35   5   38.42    3.92
 -14   0   6   56.36    4.48
  14   0  -6   50.21    5.19
  12   0  -6    0.06    0.41
 -12   0   6    0.72    0.37
 -10   0   6    8.46    0.93
 -10   0   6    9.49    1.02
  10   0  -6    8.92    0.83
   8   0  -6  196.46    6.59
  -8   0   6  190.33   11.88
  -8   0   6  182.30    7.32
  -6   0   6   22.90    1.27
  -6   0   6   23.15    1.22
  -4   0   6   16.57    1.57
  -4   0   6   16.00    1.41
  -4   0   6   18.50    1.18
  -4   0   6   18.15    0.91
  -2   0   6  341.11   10.17
  -2   0   6  351.07   17.91
   0   0   6  120.78    9.62
   0   0   6  131.16    7.69
   0   0   6  134.64    4.46
   2   0   6   53.03    2.09
   2   0   6   51.42    2.83
   4   0   6   55.86    2.10
  -4   0  -6   54.46    2.29
   4   0   6   51.73    3.29
   6   0   6   90.64    4.07
  -6   0  -6   89.89    5.17
   6   0   6   85.76    5.22
   8   0   6  106.66    9.46
  -8   0  -6  102.00    6.29
   8   0   6  103.11    7.73
 -10   0  -6    1.82    0.45
 -13  -1   6   -0.01    0.39
  13  -1  -6   -0.19    0.45
 -13   1   6    0.53    0.41
  13   1  -6    0.49    0.34
  11  -1  -6   11.96    0.82
 -11  -1   6   11.55    1.37
 -11  -1   6   12.27    1.12
  11   1  -6   10.45    1.07
 -11   1   6   13.91    1.43
 -11   1   6   11.37    1.04
  -9  -1   6    1.40    0.40
  -9  -1   6    1.12    0.32
   9  -1  -6    0.72    0.32
   9   1  -6    1.91    0.40
  -9   1   6    1.28    0.30
  -7  -1   6    0.65    0.23
   7  -1  -6    0.71    0.30
  -7  -1   6    1.08    0.34
   7   1  -6    1.08    0.40
  -7   1   6    0.70    0.20
  -7   1   6    0.96    0.34
  -5  -1   6   23.87    1.12
  -5  -1   6   23.64    1.11
  -5  -1   6   22.39    1.30
  -5   1   6   22.55    1.96
  -5   1   6   23.82    1.22
  -5   1   6   20.64    1.75
  -5   1   6   22.33    1.71
  -3  -1   6   14.75    0.90
  -3  -1   6   14.42    0.64
  -3  -1   6   15.15    1.02
  -3  -1   6   12.72    0.97
  -3   1   6   14.30    1.15
  -3   1   6   14.23    0.82
  -3   1   6   14.58    0.96
  -1  -1   6   11.57    1.37
  -1  -1   6   12.82    0.76
  -1   1   6   10.85    0.56
  -1   1   6   10.25    0.66
  -1   1   6    8.97    0.69
   1  -1   6   50.22    2.73
   1   1   6   50.59    2.39
   1   1   6   52.42    2.42
   3  -1   6    6.10    0.56
  -3  -1  -6    6.77    0.62
   3   1   6    6.09    0.49
   5  -1   6   22.62    1.45
  -5  -1  -6   20.94    1.39
   5  -1   6   21.32    1.04
   5   1   6   21.43    1.15
   5   1   6   19.66    1.30
  -5   1  -6   22.02    1.31
  -7  -1  -6    0.39    0.30
   7  -1   6    0.04    0.35
   7   1   6    0.65    0.31
   7   1   6    0.09    0.45
  -9  -1  -6    4.50    0.72
   9  -1   6    3.80    0.51
  -9   1  -6    4.31    0.69
   9   1   6    4.25    0.72
  14   2  -6   -0.29    0.30
 -12  -2   6    6.67    0.86
 -12  -2   6    7.94    0.70
  12  -2  -6    5.90    0.77
  12   2  -6    7.36    0.69
 -12   2   6    5.61    0.81
  10  -2  -6    0.57    0.34
 -10  -2   6    0.25    0.34
 -10  -2   6    0.50    0.25
 -10   2   6    0.24    0.31
  10   2  -6    0.13    0.25
 -10   2   6    0.14    0.23
   8  -2  -6    2.86    0.46
  -8  -2   6    3.65    0.50
  -8  -2   6    3.38    0.44
  -8   2   6    3.00    0.47
  -6  -2   6    1.15    0.38
  -6  -2   6    0.76    0.22
  -6   2   6    0.96    0.59
  -4  -2   6    1.36    0.33
  -4  -2   6    1.11    0.24
  -4  -2   6    1.77    0.54
  -4   2   6   10.59    9.97
  -4   2   6    1.60    0.29
  -4   2   6    1.46    0.34
  -2  -2   6   10.49    0.74
  -2   2   6   12.25    1.14
  -2   2   6   13.06    0.81
   0  -2   6   30.60    1.52
   0   2   6   22.82    1.40
   0   2   6   27.33    1.43
   0   2   6   23.58    1.33
   2  -2   6   13.09    0.76
   2   2   6   15.81    0.88
   2   2   6   16.13    1.01
   4  -2   6    1.87    0.38
  -4  -2  -6    2.46    0.45
   4   2   6    2.12    0.63
   4   2   6    2.51    0.47
  -4   2  -6    2.02    0.57
   6  -2   6    0.55    0.52
   6  -2   6    1.39    0.52
  -6  -2  -6    0.60    0.34
   6   2   6    0.51    0.31
   6   2   6    0.95    0.50
   8  -2   6    1.63    0.60
  -8  -2  -6    1.13    0.55
  -8   2  -6    0.77    0.41
   8   2   6    1.24    0.68
   8   2   6    0.92    0.38
  10  -2   6    2.91    0.66
 -10  -2  -6    2.25    0.51
 -10   2  -6    3.15    0.76
  10   2   6    2.77    0.53
 -13  -3   6   17.86    1.42
  13   3  -6   18.90    2.05
 -11  -3   6    0.35    0.28
 -11  -3   6   -0.07    0.26
  11  -3  -6   -0.12    0.27
 -11   3   6    0.69    0.32
  11   3  -6   -0.18    0.32
  -9  -3   6    9.65    0.82
  -9  -3   6    9.50    0.65
  -9   3   6    7.25    0.97
   9   3  -6    9.49    0.86
  -9   3   6    9.90    0.84
   7  -3  -6   43.28    1.82
  -7  -3   6   42.28    1.83
  -7  -3   6   43.49    1.73
  -7   3   6   34.17    2.72
   7   3  -6   40.90    2.00
  -7   3   6   39.36    3.25
  -7   3   6   40.38    1.91
  -5  -3   6    1.14    0.25
  -5   3   6    1.45    0.23
  -5   3   6    1.29    0.20
  -3  -3   6   62.52    2.04
  -3  -3   6   61.33    3.95
  -3   3   6   57.63    3.48
  -3   3   6   56.29    3.22
  -3   3   6   57.50    2.43
  -1  -3   6   15.21    0.72
  -1   3   6   15.25    0.84
  -1   3   6   14.31    1.36
  -1   3   6   16.98    1.10
   1  -3   6    4.78    0.53
   1   3   6    4.18    0.41
   3  -3   6   59.74    2.68
  -3  -3  -6   53.68    2.39
   3   3   6   52.78    2.94
   3   3   6   52.15    1.98
  -5  -3  -6    1.83    0.53
  -5   3  -6    1.06    0.55
   5   3   6    1.27    0.33
   7  -3   6    2.53    0.71
  -7   3  -6    2.87    0.45
   7   3   6    3.58    0.48
   9  -3   6   14.50    1.13
   9  -3   6   17.01    1.53
  -9  -3  -6   15.88    1.66
   9   3   6   16.14    2.13
  -9   3  -6   17.71    1.64
 -14  -4   6    8.04    1.02
  14   4  -6    8.82    0.80
  12  -4  -6    5.73    0.53
 -12  -4   6    4.19    0.84
 -12  -4   6    4.38    0.61
  12   4  -6    4.33    0.65
 -10  -4   6    5.33    0.57
  10  -4  -6    5.74    0.70
 -10  -4   6    4.59    0.49
 -10   4   6    4.45    0.42
 -10   4   6    4.14    0.56
  10   4  -6    4.53    0.63
  -8  -4   6   46.87    9.25
   8  -4  -6   44.97    3.57
  -8  -4   6   47.64    5.23
  -8   4   6   46.58    2.24
  -8   4   6   43.21    2.11
   8   4  -6   46.66    2.26
  -6  -4   6   17.96    1.22
  -6  -4   6   17.59    1.19
  -6   4   6   15.99    1.43
  -6   4   6   20.54    1.34
  -6   4   6   16.89    1.18
  -4  -4   6    1.44    0.27
  -4  -4   6    1.66    0.27
  -4   4   6    0.98    0.45
  -4   4   6    1.58    0.25
  -4   4   6    1.62    0.18
  -2  -4   6   29.16    1.42
  -2  -4   6   30.79    1.54
  -2   4   6   30.49    3.21
  -2   4   6   24.29    1.85
  -2   4   6   28.86    1.68
   0  -4   6   21.99    1.17
   0   4   6   22.03    1.23
   0   4   6   22.65    1.60
   0   4   6   24.31    1.33
  -2  -4  -6   17.95    1.05
   2  -4   6   18.74    1.03
   2   4   6   18.53    0.85
   2   4   6   16.94    0.81
  -4  -4  -6    6.94    0.46
   4  -4   6    7.87    0.63
   4   4   6    9.16    0.67
   4   4   6    6.82    0.64
  -4   4  -6    8.60    0.80
  -6  -4  -6    9.44    0.80
   6  -4   6   10.83    0.80
  -6   4  -6   10.59    0.92
   6   4   6   11.16    0.87
   6   4   6   10.63    0.91
  -8  -4  -6    6.73    0.75
   8  -4   6    8.40    1.63
   8  -4   6    7.07    0.84
   8   4   6    7.80    1.15
  -8   4  -6    9.79    1.60
   8   4   6    7.70    0.75
 -10  -4  -6    2.19    0.69
 -10   4  -6    0.54    0.61
  10   4   6    1.07    0.35
 -13  -5   6   38.53    4.84
  13   5  -6   41.48    3.27
 -11  -5   6   46.93    4.07
 -11  -5   6   52.11    4.06
  11  -5  -6   44.90    3.30
  11   5  -6   45.77    3.83
  -9  -5   6   59.36    3.34
  -9  -5   6   59.97    3.75
   9  -5  -6   65.25    5.02
  -9   5   6   61.06    3.91
  -9   5   6   56.92    5.87
   9   5  -6   60.12    2.64
  -7  -5   6   50.21    4.38
   7  -5  -6   42.25    3.21
  -7  -5   6   39.48    1.87
   7   5  -6   40.42    2.15
  -7   5   6   44.85    2.46
  -5  -5   6   91.66    6.05
  -5  -5   6   86.12    5.29
  -5   5   6   86.56    3.40
  -5   5   6   88.23    5.55
  -5   5   6   80.32    7.70
  -3  -5   6  273.43   14.33
  -3  -5   6  281.04    9.59
  -3   5   6  274.96   16.03
  -3   5   6  265.41   21.14
  -3   5   6  275.44   10.46
  -1  -5   6    2.28    0.34
  -1  -5   6    2.40    0.33
  -1   5   6    2.38    0.43
  -1   5   6    1.94    0.28
   1  -5   6   18.71    1.17
   1   5   6   16.97    1.16
   1   5   6   15.20    1.78
   1   5   6   17.61    1.01
  -3  -5  -6  208.19    9.59
   3  -5   6  200.06    8.23
   3   5   6  207.47    9.87
   3   5   6  209.19    8.37
  -5  -5  -6   22.04    1.24
   5  -5   6   22.51    1.30
  -5   5  -6   18.32    1.09
   5   5   6   22.73    1.48
   5   5   6   20.45    1.27
   7  -5   6    1.15    0.40
   7   5   6    1.15    0.45
  -7   5  -6    0.94    0.44
   9  -5   6   69.98    3.18
   9  -5   6   63.26    5.29
  -9  -5  -6   70.28    5.20
   9   5   6   65.89    5.69
  -9   5  -6   69.91    4.83
 -14  -6   6    0.06    0.53
  14   6  -6   -0.02    0.63
 -12  -6   6   13.58    1.31
 -12  -6   6   13.01    1.43
  12   6  -6   13.61    1.14
 -10  -6   6    9.77    0.88
 -10  -6   6   10.32    0.90
  10  -6  -6    9.15    0.89
  10   6  -6   10.04    1.25
  -8  -6   6    1.44    0.44
  -8  -6   6    0.66    0.29
   8  -6  -6    1.11    0.32
   8   6  -6    0.72    0.29
  -6  -6   6   50.63    2.19
  -6   6   6   44.23    2.03
  -6   6   6   42.64    3.78
  -6   6   6   46.43    3.79
  -4  -6   6    0.18    0.31
  -4  -6   6    0.57    0.23
  -4   6   6    0.26    0.35
  -2  -6   6    1.51    0.48
  -2  -6   6    1.23    0.35
  -2   6   6    1.17    0.15
  -2   6   6    1.68    0.61
  -2   6   6    1.08    0.19
   0  -6   6   72.07    3.19
   0  -6   6   58.85    3.19
   0   6   6   62.61    2.58
   0   6   6   65.99    3.45
   0   6   6   64.29    5.50
  -2  -6  -6    0.64    0.30
   2  -6   6    1.38    0.37
   2   6   6    0.95    0.30
   2   6   6    0.95    0.29
   4  -6   6   10.78    0.98
  -4  -6  -6    9.98    0.76
   4   6   6    9.30    0.76
   4   6   6    9.46    0.67
   6  -6   6   31.00    1.95
  -6  -6  -6   30.99    2.14
   6   6   6   31.01    2.09
  -6   6  -6   31.84    1.59
   6   6   6   29.63    2.28
  -8  -6  -6   -0.37    0.46
   8  -6   6    1.17    0.39
   8   6   6    0.52    0.46
  -8   6  -6    1.17    0.67
   8   6   6    0.25    0.46
  10  -6   6    2.00    0.72
 -10   6  -6    2.70    0.61
 -13  -7   6    2.06    0.58
  13   7  -6    1.22    0.76
 -11  -7   6   15.55    1.45
 -11  -7   6   15.70    1.10
  11   7  -6   16.15    1.06
  -9  -7   6    5.26    0.58
   9  -7  -6    4.97    0.72
   9   7  -6    5.68    0.72
   7  -7  -6    0.18    0.15
  -7  -7   6    0.43    0.30
  -7   7   6    0.29    0.32
   7   7  -6    0.84    0.57
  -5  -7   6   18.06    0.95
  -5  -7   6   18.68    1.03
  -5   7   6   15.52    1.05
  -5   7   6   16.76    1.06
  -5   7   6   14.48    1.17
  -3  -7   6   22.58    1.50
  -3  -7   6   23.08    1.40
  -3   7   6   21.74    7.93
  -3   7   6   18.86    1.04
  -3   7   6   19.18    1.03
  -1  -7   6    9.85    0.67
  -1  -7   6    9.46    0.69
  -1   7   6    9.49    0.74
  -1   7   6   10.10    0.69
  -1   7   6   10.13    0.63
   1  -7   6    6.57    0.60
  -1  -7  -6    7.82    0.60
   1   7   6    6.96    0.70
   1   7   6    6.79    0.67
   1   7   6    6.15    0.45
  -3  -7  -6    9.88    0.84
   3  -7   6   12.63    0.98
   3   7   6   13.51    0.95
   3   7   6   10.89    0.79
  -5  -7  -6   13.91    0.81
   5  -7   6   14.01    1.11
   5   7   6   13.51    1.14
   5   7   6   11.92    1.22
  -5   7  -6   13.35    0.85
   7  -7   6    1.61    0.63
  -7  -7  -6    1.36    0.50
  -7   7  -6    0.94    0.40
   7   7   6    1.16    0.39
   9  -7   6    7.51    1.04
  -9  -7  -6    5.13    0.89
  -9   7  -6    8.34    0.98
   9   7   6    6.81    0.61
 -14  -8   6   20.03    2.55
  14   8  -6   17.56    1.64
 -12  -8   6    3.26    0.43
 -12  -8   6    3.53    0.62
  12   8  -6    2.97    0.47
 -10  -8   6    1.16    0.42
  -8  -8   6  114.82    6.41
   8  -8  -6  118.22    6.30
   8   8  -6  112.80    3.53
  -6  -8   6    2.03    0.54
  -6   8   6    2.29    0.39
  -6   8   6    1.87    0.17
  -4  -8   6    1.05    0.41
  -4   8   6    0.29    0.41
  -4   8   6    0.58    0.06
  -4   8   6    0.48    0.06
  -2  -8   6   91.54    3.20
  -2  -8   6   86.78    3.17
  -2   8   6   90.24    3.31
   0  -8   6    8.89    0.62
   0  -8   6    9.37    0.67
   0   8   6    6.83    0.60
   0   8   6    8.36    0.79
   0   8   6    6.44    0.50
   2  -8   6   31.33    1.38
  -2  -8  -6   35.34    1.49
   2   8   6   32.70    2.42
   2   8   6   33.80    1.64
  -4  -8  -6   20.82    1.23
   4  -8   6   22.51    1.36
   4   8   6   17.89    1.11
   4   8   6   18.99    0.90
  -6  -8  -6    5.43    0.62
   6  -8   6    5.53    0.57
  -6   8  -6    7.40    0.63
   6   8   6    6.50    0.63
   8  -8   6   38.43    2.88
  -8  -8  -6   36.98    2.32
   8   8   6   32.82    3.54
   8   8   6   36.91    3.58
  -8   8  -6   38.29    2.16
 -10  -8  -6    3.70    0.67
  10  -8   6    3.11    0.89
  10   8   6    2.60    0.53
 -13  -9   6   15.74    1.67
  13   9  -6   16.94    1.56
 -11  -9   6    1.43    0.41
 -11  -9   6    1.23    0.52
  11   9  -6    1.46    0.37
  -9  -9   6   17.20    1.23
  -9  -9   6   13.42    1.10
   9   9  -6   14.58    1.20
  -7  -9   6    6.23    0.61
   7   9  -6    8.57    0.56
  -7   9   6    7.52    0.85
  -5   9   6    4.71    0.27
  -3  -9   6   51.71    2.45
  -3  -9   6   53.64    1.98
  -3   9   6   50.75    2.11
  -1  -9   6    0.63    0.37
  -1  -9   6    1.03    0.31
  -1   9   6    0.32    0.48
   1  -9   6    7.14    0.65
  -1  -9  -6    7.26    0.52
   1  -9   6    7.64    0.68
   1   9   6    7.74    0.63
   1   9   6    7.73    0.44
   1   9   6    8.95    0.73
  -3  -9  -6   75.84    5.39
   3  -9   6   81.32    5.35
   3   9   6   82.55    3.60
   3   9   6   74.18    6.73
  -5  -9  -6    0.80    0.39
   5   9   6    0.29    0.44
  -7  -9  -6    0.60    0.42
   7  -9   6    0.38    0.36
   7   9   6    0.72    0.48
   7   9   6    1.48    0.52
  -7   9  -6    0.26    0.42
  -9  -9  -6   20.71    1.72
   9  -9   6   24.32    1.79
   9   9   6   19.59    2.00
  -9   9  -6   22.82    1.87
 -14 -10   6   17.89    2.18
  14  10  -6   22.95    2.57
 -12 -10   6    1.40    0.30
  12  10  -6    0.91    0.50
 -10 -10   6    5.08    0.47
 -10 -10   6    7.18    0.69
  10  10  -6    7.12    0.77
  -8 -10   6   60.72    3.51
   8  10  -6   61.67    3.28
  -6 -10   6   30.83    1.30
  -6 -10   6   24.81    1.14
  -6  10   6   25.63    1.43
  -6  10   6   29.04    1.70
  -4 -10   6    0.33    0.44
  -4 -10   6    0.54    0.39
  -4  10   6    0.33    0.39
  -2 -10   6   89.11    3.42
  -2 -10   6   84.79    3.44
  -2  10   6   95.21    6.38
   0 -10  -6   64.79    3.84
   0 -10   6   59.37    2.90
   0 -10   6   65.66    2.84
   0  10   6   51.60    2.91
   0  10   6   64.87    2.66
  -2 -10  -6   23.64    1.20
   2 -10   6   21.43    1.49
   2  10   6   23.93    1.50
   2  10   6   22.21    1.65
   4 -10   6   22.66    1.71
  -4 -10  -6   28.95    1.72
   4  10   6   25.59    1.66
   4  10   6   25.90    1.59
  -6 -10  -6   29.53    1.95
   6 -10   6   25.76    1.77
  -6  10  -6   27.63    1.53
   6  10   6   27.43    2.56
   6  10   6   26.56    1.68
  -8 -10  -6   38.64    2.50
   8 -10   6   33.83    2.57
   8  10   6   35.61    2.38
  -8  10  -6   37.08    2.20
  10 -10   6    0.55    0.41
 -10 -10  -6   -0.09    0.64
  10  10   6    0.07    0.28
 -10  10  -6    0.02    0.72
 -13 -11   6    7.86    1.12
  13  11  -6    9.00    1.21
 -11 -11   6   32.71    2.52
 -11 -11   6   29.74    2.05
  11  11  -6   30.38    2.16
  -9 -11   6    2.05    0.48
   9  11  -6    3.17    0.73
  -7 -11   6   34.20    1.81
   7  11  -6   29.33    1.72
  -5 -11   6   31.69    1.12
  -5 -11   6   32.71    1.20
  -5  11   6   31.46    1.57
  -3 -11   6    6.73    0.51
  -3 -11   6    6.58    0.56
  -3  11   6    7.43    0.97
  -1 -11   6    1.03    0.27
  -1 -11   6    0.28    0.36
   1 -11  -6    0.87    0.16
  -1  11   6    2.52    1.91
   1 -11   6    7.00    0.67
  -1 -11  -6    8.07    0.72
   1 -11   6    9.01    0.51
   1  11   6    8.05    0.75
   1  11   6    7.47    0.47
   3 -11   6    0.75    0.50
  -3 -11  -6    0.92    0.29
   3  11   6    0.76    0.54
  -5 -11  -6   27.17    1.50
   5 -11   6   26.65    1.58
   5  11   6   24.77    1.85
   5  11   6   24.60    1.30
   7 -11   6    5.45    0.75
  -7 -11  -6    5.74    0.51
   7  11   6    5.64    0.65
   9 -11   6    2.18    0.57
  -9  11  -6    2.25    0.76
   9  11   6    1.84    0.46
 -12 -12   6    0.43    0.66
  12  12  -6    1.13    0.53
 -10 -12   6    5.32    0.83
  10  12  -6    3.95    0.64
  -8 -12   6   50.69    2.48
   8  12  -6   46.78    1.85
  -6 -12   6   25.86    1.16
  -6 -12   6   23.21    1.19
  -4 -12   6    6.31    0.73
  -4 -12   6    6.90    0.52
  -4  12   6    5.66    0.57
  -2 -12   6  119.50    4.23
  -2 -12   6  118.09    4.86
  -2  12   6  110.93    4.85
   0 -12   6   36.59    1.70
   0 -12   6   37.30    1.64
   0 -12  -6   35.12    1.97
   0  12   6   38.80    1.72
   2 -12   6   28.74    1.67
  -2 -12  -6   27.74    1.96
   2 -12   6   25.45    1.75
   2  12   6   30.70    1.47
   2  12   6   25.73    2.45
   4 -12   6   25.27    1.64
  -4 -12  -6   22.43    1.67
   4  12   6   19.73    1.57
   4  12   6   23.37    1.54
   6 -12   6   19.46    1.44
  -6 -12  -6   19.91    1.52
   6  12   6   23.17    1.33
  -6  12  -6   20.75    1.62
   8 -12   6   33.93    2.44
  -8 -12  -6   26.56    2.22
  -8  12  -6   33.44    2.22
   8  12   6   26.32    2.92
 -13 -13   6   27.58    3.25
  13  13  -6   30.46    2.48
 -11 -13   6   10.29    0.98
 -11 -13   6    9.55    0.89
  11  13  -6    9.75    0.93
  -9 -13   6    4.90    0.73
   9  13  -6    5.01    0.70
  -7 -13   6   20.73    1.08
  -5 -13   6   14.36    0.91
  -5 -13   6   15.76    0.83
  -3 -13   6   79.34    3.01
  -3 -13   6   81.56    2.65
  -1 -13   6    1.41    0.38
  -1  13   6    1.69    0.47
   1 -13   6   26.73    1.59
   1 -13   6   25.69    1.78
   1  13   6   40.58   23.33
   3 -13   6   89.49    4.63
  -3 -13  -6   96.11    4.99
   3  13   6   91.97    5.16
   3  13   6   95.44    4.80
  -5 -13  -6    3.92    0.45
   5 -13   6    4.27    0.54
   5  13   6    4.44    0.49
  -7 -13  -6    0.12    0.39
   7  13   6    0.23    0.23
  -9 -13  -6   23.62    2.28
   9 -13   6   22.49    1.49
  -9  13  -6   21.60    2.22
 -12 -14   6    0.41    0.55
  12  14  -6    0.12    0.41
 -10 -14   6    2.57    1.18
  10  14  -6    3.51    2.15
  -8 -14   6   66.16    2.86
   8  14  -6   67.95    3.66
  -6 -14   6    0.59    0.27
  -6 -14   6    0.31    0.32
  -4 -14   6    4.25    0.65
  -4 -14   6    5.66    0.60
  -2 -14   6   44.03    2.05
  -2 -14   6   40.35    1.76
   0 -14   6    0.92    0.38
   0 -14   6    0.21    0.34
   2 -14   6   20.52    1.39
   2 -14   6   22.36    1.58
   4 -14   6   27.62    2.06
  -4 -14  -6   26.04    1.31
   4  14   6   24.82    1.46
  -6 -14  -6    0.88    0.29
   6 -14   6    1.22    0.77
  -6  14  -6    0.22    0.58
   6  14   6    1.05    0.25
   8 -14   6   12.58    1.13
  -8  14  -6   13.99    1.61
 -13 -15   6    0.89    0.68
  13  15  -6    0.23    0.46
 -11 -15   6    5.98    0.70
  -9 -15   6    3.67    0.47
   9  15  -6    2.33    0.63
  -7 -15   6    0.17    0.32
  -5 -15   6   14.82    0.91
  -5 -15   6   14.23    0.72
  -3 -15   6    5.41    0.57
  -3 -15   6    6.49    0.71
  -1 -15   6   19.39    1.07
  -1 -15   6   18.67    1.16
   1 -15   6   19.60    1.00
   1 -15   6   18.25    1.08
   3 -15   6    9.47    0.97
  -5 -15  -6   10.12    0.83
   5 -15   6   11.07    1.15
   7 -15   6    2.32    0.71
  -7  15  -6    2.29    0.51
   9 -15   6    3.77    0.76
  -9  15  -6    3.04    0.85
 -12 -16   6   12.29    0.99
  12  16  -6    9.71    0.83
 -10 -16   6    0.26    0.60
  10  16  -6    0.43    0.34
  -8 -16   6   -0.45    0.54
   8  16  -6    0.49    0.60
  -6 -16   6   19.18    1.34
  -6 -16   6   19.63    1.10
  -4 -16   6    0.00    0.53
  -4 -16   6    0.20    0.48
  -2 -16   6    8.81    0.74
  -2 -16   6    7.41    0.65
   0 -16   6   50.35    2.80
   0 -16   6   44.61    2.36
   2 -16   6    2.26    0.59
   4 -16   6    2.75    0.76
   6 -16   6   10.33    0.84
   8 -16   6    0.64    0.54
  -8  16  -6    0.58    0.51
 -11 -17   6   28.84    2.71
  11  17  -6   34.18    2.00
  -9 -17   6   54.87    4.06
   9  17  -6   43.12    2.94
  -7 -17   6   35.35    2.54
  -7 -17   6   37.95    1.62
  -5 -17   6   35.81    1.73
  -5 -17   6   33.48    1.50
  -3 -17   6  177.00    8.14
  -3 -17   6  172.64    6.29
  -1 -17   6    2.15    0.58
  -1 -17   6    2.75    0.39
   1 -17   6   15.63    1.34
   1 -17   6   15.09    1.04
   3 -17   6  123.94    6.98
   3 -17   6  126.08    6.27
   5 -17   6    8.34    0.90
   7 -17   6    1.16    0.62
  -7  17  -6    1.34    0.71
 -12 -18   6    2.71    0.53
  12  18  -6    3.21    0.75
 -10 -18   6   14.85    1.26
  10  18  -6   11.47    1.18
  -8 -18   6   33.56    2.20
   8  18  -6   28.94    1.66
  -6 -18   6   16.89    1.01
  -6 -18   6   17.38    1.18
  -4 -18   6    1.15    0.49
  -4 -18   6    1.27    0.49
  -2 -18   6   46.22    2.22
  -2 -18   6   47.45    2.20
   0 -18   6   28.04    1.56
   0 -18   6   26.49    1.72
   2 -18   6   12.31    1.04
   2 -18   6   11.26    0.86
   4 -18   6    1.58    0.47
   6 -18   6   22.43    2.15
  -6  18  -6   25.79    1.93
   8 -18   6   16.57    1.53
  -8  18  -6   15.73    1.64
 -11 -19   6   -0.46    0.40
  11  19  -6    0.48    0.47
  -9 -19   6    8.22    0.96
   9  19  -6    8.03    0.91
  -7 -19   6    6.27    0.91
  -7 -19   6    9.42    0.86
  -5 -19   6   -0.75    0.54
  -5 -19   6    0.38    0.32
  -3 -19   6   30.58    1.48
  -3 -19   6   29.54    1.60
  -1 -19   6   14.10    0.98
  -1 -19   6   14.45    0.85
   1 -19   6    2.98    0.64
   1 -19   6    2.11    0.66
   3 -19   6   18.42    1.23
   3 -19   6   19.57    1.64
   5 -19   6    2.77    0.53
   7 -19   6    0.24    0.49
  -7  19  -6    1.31    0.56
 -10 -20   6   -0.59    0.54
  10  20  -6    0.10    0.47
  -8 -20   6    1.86    0.64
  -6 -20   6    4.30    0.76
  -4 -20   6    2.90    0.62
  -4 -20   6    2.59    0.55
  -2 -20   6   14.05    0.97
  -2 -20   6   12.32    1.04
   0 -20   6    4.17    0.78
   0 -20   6    4.48    0.55
   2 -20   6    2.01    0.60
   4 -20   6    3.61    0.93
   6 -20   6    1.12    0.56
 -11 -21   6    2.60    0.56
  11  21  -6    1.99    0.44
  -9 -21   6    4.62    0.73
  -7 -21   6    2.17    0.46
  -7 -21   6    2.10    0.61
  -5 -21   6    4.79    0.56
  -5 -21   6    4.53    0.67
  -3 -21   6    3.05    0.70
  -3 -21   6    3.02    0.51
  -1 -21   6    8.21    0.80
  -1 -21   6    6.68    0.85
   1 -21   6    3.20    0.59
   1 -21   6    3.00    0.65
   3 -21   6    0.81    0.41
   3 -21   6    0.92    0.69
   5 -21   6    1.09    0.62
   7 -21   6    2.74    0.76
  -7  21  -6    1.42    0.61
 -10 -22   6    1.34    0.57
  -8 -22   6   99.36    5.52
  -8 -22   6   95.86    6.16
  -6 -22   6   26.14    1.69
  -6 -22   6   29.21    1.84
  -4 -22   6    7.46    0.96
  -4 -22   6    7.22    0.78
  -2 -22   6  144.18    8.84
  -2 -22   6  137.81    6.31
   0 -22   6   40.31    2.64
   0 -22   6   47.04    2.12
   2 -22   6   35.39    2.04
   2 -22   6   31.90    1.60
   4 -22   6   21.92    1.56
   6 -22   6   31.88    3.34
  -9 -23   6   -0.78    0.60
  -7 -23   6   -0.25    0.62
  -7 -23   6   -0.32    0.37
  -5 -23   6   27.21    1.56
  -5 -23   6   26.28    1.62
  -3 -23   6   14.45    1.24
  -3 -23   6   11.48    1.18
  -1 -23   6   13.14    1.48
  -1 -23   6   12.96    1.03
   1 -23   6   28.55    2.35
   1 -23   6   29.75    1.92
   3 -23   6    2.67    0.72
   3 -23   6    2.63    0.60
   5 -23   6   18.51    1.65
 -10 -24   6    1.86    0.73
  -8 -24   6    0.29    0.56
  -8 -24   6    0.22    0.37
  -6 -24   6    1.08    0.61
  -6 -24   6    0.60    0.53
  -4 -24   6    0.75    0.64
  -4 -24   6   -0.23    0.45
  -2 -24   6    3.73    0.63
   0 -24   6    9.86    0.90
   0 -24   6    9.68    1.22
   2 -24   6    1.81    0.47
   2 -24   6    1.64    0.72
   4 -24   6    1.31    0.63
   4 -24   6    1.36    0.61
   6 -24   6    0.42    0.47
  -9 -25   6    6.31    0.99
  -9 -25   6    6.03    0.63
  -7 -25   6   28.18    1.86
  -7 -25   6   25.16    2.05
  -5 -25   6    0.34    0.40
  -5 -25   6    0.31    0.35
  -3 -25   6   34.41    2.17
  -3 -25   6   32.57    2.37
  -1 -25   6    2.08    0.64
  -1 -25   6    1.77    0.69
   1 -25   6   -0.69    0.64
   1 -25   6   -0.08    0.36
   3 -25   6   22.39    2.03
   3 -25   6   20.55    1.35
   5 -25   6    0.08    0.51
  -8 -26   6    2.98    0.74
  -8 -26   6    4.20    0.65
  -6 -26   6    1.74    0.71
  -4 -26   6    1.04    0.46
  -2 -26   6    4.63    0.73
  -2 -26   6    4.84    0.82
   0 -26   6    1.29    0.80
   2 -26   6    3.81    0.73
   4 -26   6    9.20    0.92
   4 -26   6    8.68    1.28
  -7 -27   6   13.92    1.31
  -7 -27   6   14.67    1.29
  -5 -27   6   20.92    1.51
  -5 -27   6   23.38    1.50
  -3 -27   6   67.66    4.45
  -3 -27   6   62.15    4.27
  -1 -27   6   -0.51    0.57
  -1 -27   6    0.63    0.47
   1 -27   6    8.87    1.11
   1 -27   6    9.36    1.01
   3 -27   6   88.70    5.87
   3 -27   6   93.08    4.93
  -8 -28   6    0.25    0.63
  -8 -28   6    0.75    0.60
  -6 -28   6   21.77    1.75
  -6 -28   6   25.78    1.71
  -4 -28   6    2.08    0.67
  -4 -28   6    3.39    0.59
  -2 -28   6    1.26    0.48
  -2 -28   6    1.30    0.54
   0 -28   6   19.48    1.77
   0 -28   6   20.17    1.87
   2 -28   6    0.14    0.50
   2 -28   6    0.50    0.79
   4 -28   6    1.62    0.71
   4 -28   6    2.36    0.72
  -7 -29   6    0.93    0.56
  -7 -29   6   -0.13    0.50
  -5 -29   6    5.30    0.58
  -5 -29   6    3.89    0.58
  -3 -29   6    7.11    0.82
  -1 -29   6    0.81    0.58
  -1 -29   6    0.88    0.46
   1 -29   6    1.13    0.66
   1 -29   6    0.90    0.80
   3 -29   6    3.33    0.55
   3 -29   6    4.33    1.03
  -6 -30   6   -0.12    0.43
  -6 -30   6   -0.24    0.72
  -4 -30   6    0.86    0.73
  -2 -30   6   35.66    2.16
  -2 -30   6   31.75    2.61
   0 -30   6    6.36    0.86
   0 -30   6    4.89    1.09
   2 -30   6    9.38    1.01
   2 -30   6    8.18    1.15
  -5 -31   6   -0.01    0.50
  -5 -31   6    0.13    0.50
  -3 -31   6    9.83    1.35
  -3 -31   6    9.17    1.34
  -1 -31   6   -0.50    0.60
  -1 -31   6   -0.77    0.43
   1 -31   6   -0.11    0.67
   1 -31   6   -0.34    0.41
  -2 -32   6   11.54    1.16
 -12   0   7    0.55    0.36
 -10   0   7    0.08    0.44
  -8   0   7    0.54    0.54
  -8   0   7   -0.08    0.20
  -6   0   7    0.94    0.54
  -6   0   7    0.41    0.21
  -4   0   7    0.12    0.52
  -4   0   7    0.17    0.25
  -2   0   7    1.13    0.27
  -2   0   7    0.57    0.47
   0   0   7    0.38    0.26
   0   0   7    0.05    0.33
   4   0   7    0.48    0.46
   4   0   7    0.15    0.37
  -4   0  -7    0.40    0.31
   6   0   7    0.41    0.49
   8   0   7    0.15    0.44
   8   0   7    0.70    0.59
 -11  -1   7    0.34    0.39
 -11   1   7   -0.19    0.36
  -9  -1   7   67.11    4.24
   9   1  -7   66.43    2.96
  -9   1   7   71.12    5.07
  -7  -1   7   19.14    0.94
  -7  -1   7   17.80    2.20
  -7  -1   7   22.70    1.41
  -7   1   7   18.89    1.72
  -7   1   7   22.98    1.24
  -5  -1   7   11.77    1.04
  -5  -1   7   11.73    0.76
  -5  -1   7   13.75    0.93
  -5   1   7   14.69    0.85
  -5   1   7   15.99    1.33
  -3  -1   7   47.37    2.47
  -3  -1   7   42.12    2.28
  -3   1   7   48.36    2.64
  -3   1   7   48.57    3.14
  -1  -1   7   20.85    1.38
  -1   1   7   24.96    1.34
  -1   1   7   22.38    2.38
   1  -1   7   94.45    3.75
   1  -1   7   98.62    5.40
   1   1   7   94.36    4.41
   1   1   7  103.25    7.83
  -3  -1  -7   14.67    1.04
   3  -1   7   15.74    1.02
   3  -1   7   14.64    1.04
   3   1   7   13.67    1.14
   3   1   7   14.66    1.17
  -3   1  -7   14.07    1.16
  -5  -1  -7   10.34    0.93
   5  -1   7    8.55    0.65
   5  -1   7   10.83    0.71
   5   1   7    8.38    1.08
   5   1   7   10.59    0.94
  -5   1  -7   10.38    1.04
  -7  -1  -7   38.22    2.24
   7  -1   7   39.15    3.58
   7  -1   7   35.16    3.29
   7   1   7   36.86    4.01
  -7   1  -7   39.02    3.68
   7   1   7   38.40    3.08
 -12  -2   7    5.30    0.77
 -10  -2   7    2.31    0.53
 -10   2   7    2.72    0.74
  10   2  -7    2.82    0.54
  -8  -2   7   10.92    0.74
  -8  -2   7    9.85    0.78
  -8   2   7   11.62    0.98
  -8   2   7    9.83    0.85
  -6  -2   7   13.27    1.04
  -6  -2   7   11.52    1.32
  -6   2   7   14.46    0.79
  -6   2   7   11.65    0.86
  -4  -2   7    0.46    0.22
  -4  -2   7    0.70    0.37
  -4  -2   7    0.59    0.28
  -4   2   7    0.61    0.20
  -2  -2   7   31.02    2.16
  -2  -2   7   34.03    1.62
  -2   2   7   34.46    1.89
  -2   2   7   29.93    3.07
   0  -2   7    4.46    0.52
   0  -2   7    3.77    0.55
   0   2   7    3.08    0.32
   0   2   7    3.89    0.53
   2  -2   7    1.60    0.56
   2   2   7    1.28    0.72
   2   2   7    1.71    0.28
   4  -2   7   17.08    1.08
  -4  -2  -7   20.68    1.40
   4  -2   7   20.48    1.39
   4   2   7   18.68    1.78
  -4   2  -7   22.28    1.34
   4   2   7   18.29    1.24
   6  -2   7    2.39    0.52
   6  -2   7    2.17    0.60
   6   2   7    1.44    0.59
  -6   2  -7    3.09    0.48
   6   2   7    2.67    0.44
   8  -2   7    1.56    0.50
   8  -2   7    0.40    0.38
  -8  -2  -7    0.80    0.33
  -8   2  -7    1.54    0.55
   8   2   7    0.82    0.40
   8   2   7    0.96    0.62
 -11  -3   7    0.08    0.27
  11   3  -7   -0.24    0.23
 -11   3   7    0.09    0.27
  -9  -3   7    6.63    0.78
  -9  -3   7    5.60    0.54
   9   3  -7    5.61    0.55
  -7  -3   7   42.33    2.49
  -7  -3   7   47.58    3.04
  -7  -3   7   46.09    2.95
  -7   3   7   41.98    4.48
  -7   3   7   45.66    2.62
  -5  -3   7    7.11    0.81
  -5  -3   7    7.16    0.70
  -5  -3   7    6.58    0.74
  -5   3   7    6.68    0.49
  -5   3   7    7.04    0.85
  -3  -3   7    5.16    0.50
  -3  -3   7    5.67    0.72
  -3   3   7    5.91    0.68
  -3   3   7    6.03    0.52
  -1  -3   7   34.74    2.14
  -1   3   7   34.31    1.95
  -1   3   7   34.39    1.78
   1  -3   7   19.16    1.12
   1   3   7   17.26    1.43
   1   3   7   17.05    1.01
   3  -3   7    0.93    0.38
   3  -3   7    0.39    0.41
  -3  -3  -7    1.13    0.44
   3   3   7    1.78    0.61
   3   3   7    1.74    0.43
  -5  -3  -7   14.50    1.19
   5  -3   7   17.73    1.38
   5  -3   7   15.33    1.48
  -5   3  -7   16.67    1.20
   5   3   7   15.44    1.59
   5   3   7   15.33    1.04
   7  -3   7   12.01    1.18
  -7  -3  -7    9.24    1.04
   7  -3   7    9.61    0.92
   7   3   7    8.26    1.26
   7   3   7    8.51    1.18
  -7   3  -7   12.21    1.37
 -12  -4   7   16.54    1.61
  12   4  -7   15.56    1.67
 -10  -4   7   70.40    4.31
 -10  -4   7   68.15    4.76
 -10   4   7   75.65    5.11
  10   4  -7   63.01    6.20
  -8  -4   7    6.36    0.69
  -8  -4   7    4.93    0.43
  -8   4   7    5.58    0.50
  -8   4   7    5.65    0.67
  -6  -4   7   21.05    2.02
  -6  -4   7   20.43    1.37
  -6  -4   7   21.44    1.16
  -6   4   7   20.85    2.50
  -6   4   7   23.81    1.36
  -4  -4   7  182.57    6.48
  -4  -4   7  182.31   11.18
  -4  -4   7  182.93   12.09
  -4   4   7  163.65    7.79
  -4   4   7  170.79   17.81
  -2  -4   7    3.20    0.41
  -2   4   7    2.70    0.30
  -2   4   7    3.77    0.75
   0  -4   7    1.41    0.40
   0   4   7    1.96    0.49
   0   4   7    1.68    0.26
   2  -4   7  161.46    8.11
  -2  -4  -7  165.80    9.08
   2   4   7  157.87   10.87
   2   4   7  156.55    5.95
  -4  -4  -7   22.41    1.50
   4  -4   7   22.89    1.57
   4   4   7   21.52    2.02
  -4   4  -7   24.92    1.42
   4   4   7   22.89    1.72
  -6  -4  -7   11.13    0.76
   6  -4   7   11.44    1.16
   6  -4   7   13.01    1.36
   6   4   7   11.38    1.10
  -6   4  -7   11.10    1.13
   6   4   7   11.47    0.90
  -8  -4  -7   26.69    2.34
   8  -4   7   27.68    2.01
   8  -4   7   28.21    1.76
  -8   4  -7   28.28    1.97
   8   4   7   24.05    2.33
   8   4   7   24.55    1.80
  13   5  -7    3.22    0.51
 -11  -5   7    0.93    0.29
 -11  -5   7    1.19    0.48
  11   5  -7    0.22    0.46
  -9  -5   7    0.99    0.71
   9   5  -7    0.47    0.45
  -7  -5   7    3.19    0.46
  -7  -5   7    3.38    0.53
  -7  -5   7    3.10    0.44
  -7   5   7    2.45    0.46
  -5  -5   7    3.40    1.82
  -5  -5   7    3.53    0.96
  -5  -5   7    4.57    1.57
  -5   5   7    2.52    0.59
  -5   5   7    2.89    0.31
  -3  -5   7    6.03    0.52
  -3  -5   7    6.26    0.51
  -3   5   7    5.41    0.41
  -3   5   7    6.24    0.71
  -1  -5   7    0.94    0.32
  -1   5   7    1.14    0.19
   1  -5   7    0.92    0.44
  -1  -5  -7    0.53    0.19
   1   5   7    0.37    0.46
  -3  -5  -7    4.89    0.60
   3  -5   7    5.43    0.64
   3   5   7    4.38    0.60
   3   5   7    3.43    0.33
  -5  -5  -7    1.09    0.38
   5   5   7    1.63    0.43
  -5   5  -7    1.34    0.43
   7  -5   7    3.35    0.59
   7  -5   7    3.76    0.88
  -7  -5  -7    3.89    0.58
   7   5   7    3.17    0.44
   7   5   7    2.56    0.53
 -12  -6   7    3.75    0.63
  12   6  -7    3.64    0.69
 -10  -6   7    6.23    0.83
 -10  -6   7    8.76    0.96
  10   6  -7    6.54    0.63
 -10   6   7    7.35    0.84
  -8  -6   7    0.95    0.32
  -8  -6   7    0.84    0.49
  -8  -6   7    0.68    0.28
  -8   6   7    0.91    0.41
  -6  -6   7    0.96    0.44
  -6  -6   7    1.41    0.33
  -6   6   7    0.82    0.33
  -4  -6   7   27.58    1.62
  -4  -6   7   29.26    2.62
  -4   6   7   34.63    1.93
  -2  -6   7    0.84    0.35
  -2  -6   7    0.17    0.21
  -2   6   7    0.38    0.11
  -2   6   7    1.03    0.50
   0  -6   7    0.20    0.26
   0   6   7    0.30    0.30
   0   6   7    0.01    0.16
   2  -6   7   32.40    2.23
  -2  -6  -7   36.32    3.21
   2   6   7   33.68    2.92
   2   6   7   34.83    2.52
  -4  -6  -7    4.72    0.46
   4  -6   7    4.10    0.53
   4   6   7    5.21    0.71
   4   6   7    4.87    0.84
  -6  -6  -7    1.99    0.38
   6  -6   7    2.23    0.59
  -6   6  -7    1.37    0.49
   6   6   7    2.80    0.60
   6   6   7    2.45    0.64
  -8  -6  -7   10.05    1.27
   8  -6   7   11.29    1.15
   8  -6   7    7.99    0.65
  -8   6  -7   10.03    1.15
 -11  -7   7    0.65    0.41
 -11  -7   7    0.27    0.34
  11   7  -7    0.66    0.32
  -9  -7   7   14.88    1.05
  -9  -7   7   15.10    1.30
  -9   7   7   12.47    1.15
   9   7  -7   14.19    1.15
  -7  -7   7   16.45    1.44
  -7  -7   7   15.84    1.07
  -7  -7   7   18.44    1.24
  -7   7   7   19.20    1.43
  -5  -7   7    4.06    0.48
  -5  -7   7    4.00    0.50
  -5   7   7    4.11    0.53
  -3  -7   7    9.82    0.81
  -3  -7   7    9.40    0.93
  -3   7   7   10.09    1.01
  -1  -7   7    7.37    0.63
  -1  -7   7    8.40    0.67
  -1   7   7    7.98    0.79
   1   7   7    2.99    0.61
   1   7   7    2.20    0.25
   3  -7   7   15.06    1.05
  -3  -7  -7   16.05    1.27
   3   7   7   15.36    1.01
   3   7   7   14.58    1.02
   5  -7   7   12.31    1.07
  -5  -7  -7   11.09    0.76
   5   7   7   10.81    0.78
  -5   7  -7    8.36    0.90
   5   7   7    8.87    1.01
  -7  -7  -7    2.69    0.68
  -7   7  -7    2.15    0.70
   7   7   7    3.10    0.58
 -12  -8   7    6.43    0.65
 -12  -8   7    5.91    0.82
  12   8  -7    6.03    0.82
 -10  -8   7   33.82    2.16
 -10  -8   7   34.42    3.94
  10   8  -7   37.85    2.14
  -8  -8   7    0.01    0.29
  -8  -8   7    0.36    0.37
  -8  -8   7    0.59    0.47
  -8   8   7    0.29    0.59
  -6  -8   7   19.00    1.26
  -6  -8   7   20.96    1.48
  -6   8   7   16.28    1.11
  -4  -8   7   69.68    3.69
  -4  -8   7   70.07    3.50
  -4   8   7   64.76    3.53
  -2  -8   7    8.06    0.81
  -2  -8   7    8.69    0.70
  -2   8   7    9.11    0.94
   0  -8   7    2.85    0.44
   0   8   7    3.78    1.03
  -2  -8  -7   43.51    4.76
   2  -8   7   45.01    3.36
   2   8   7   47.42    2.56
  -4  -8  -7   34.90    2.20
   4  -8   7   29.97    1.66
   4   8   7   29.59    2.41
  -6  -8  -7    2.79    0.47
   6  -8   7    2.40    0.57
   6   8   7    2.44    0.57
  -8  -8  -7   11.54    0.96
   8  -8   7   11.82    1.44
  -8   8  -7   13.38    1.37
 -11  -9   7    0.45    0.41
  11   9  -7    0.69    0.51
  -9  -9   7   54.96    4.25
  -9  -9   7   61.40    2.72
  -7  -9   7   44.57    2.18
  -7  -9   7   38.88    2.67
  -7   9   7   38.95    2.04
  -5  -9   7   23.11    1.74
  -5  -9   7   24.80    1.56
  -5   9   7   23.51    1.54
  -3  -9   7   58.07    3.23
  -3  -9   7   53.98    2.68
  -3   9   7   55.39    3.55
  -1  -9   7   75.42    4.16
  -1  -9   7   76.88    4.53
  -1   9   7   76.17    3.46
   1  -9   7   82.34    4.21
   1   9   7   84.33    4.22
   3   9   7    3.82    0.66
  -5  -9  -7   28.11    2.19
   5  -9   7   28.79    1.83
  -5   9  -7   29.69    2.20
   5   9   7   30.08    1.84
  -7  -9  -7   60.51    5.32
   7  -9   7   59.00    4.04
  -7   9  -7   62.42    5.57
   7   9   7   57.51    5.83
 -12 -10   7    2.79    0.70
  12  10  -7    2.77    0.71
 -10 -10   7    9.46    1.05
 -10 -10   7   10.21    1.03
  10  10  -7    7.58    0.81
  -8 -10   7   22.45    1.36
  -8 -10   7   21.50    1.25
  -6 -10   7    7.99    0.86
  -6 -10   7    8.39    0.70
  -6  10   7    7.83    0.76
  -4 -10   7    8.40    0.62
  -4  10   7   10.10    0.87
  -2 -10   7   11.24    0.59
  -2 -10   7   10.15    0.97
  -2  10   7   12.70    1.39
   0  10   7    8.94    4.21
   2 -10   7    0.58    0.34
   2  10   7    1.51    1.38
   4 -10   7    4.38    0.67
   4  10   7    4.51    0.78
   6 -10   7    3.73    0.63
  -6  10  -7    5.11    0.83
   6  10   7    4.35    0.63
   8 -10   7    4.04    0.82
  -8  10  -7    3.62    0.80
 -11 -11   7   -0.53    0.34
  11  11  -7    0.42    0.40
  -9 -11   7    0.55    0.49
  -9 -11   7    0.05    0.31
  -7 -11   7   -0.18    0.32
  -7 -11   7    0.09    0.42
  -5 -11   7   -0.06    0.36
  -5  11   7    1.52    0.76
  -3 -11   7    0.16    0.41
  -3 -11   7    0.52    0.33
  -3  11   7    1.29    0.46
  -1 -11   7    0.91    0.49
  -1 -11   7    0.10    0.37
  -1  11   7    0.10    0.88
   1 -11   7    1.35    0.46
   3 -11   7    0.44    0.43
   3  11   7    0.60    0.34
   5 -11   7    1.12    0.63
   5  11   7   -0.11    0.39
   7 -11   7    1.55    1.75
  -7  11  -7    1.53    0.71
 -12 -12   7    0.57    0.38
  12  12  -7    0.18    0.39
 -10 -12   7    3.06    0.49
 -10 -12   7    3.15    0.66
  10  12  -7    4.53    0.76
  -8 -12   7   17.34    1.05
  -8 -12   7   19.80    1.34
  -6 -12   7    1.15    0.32
  -4 -12   7   16.67    1.07
  -4 -12   7   14.92    0.92
  -4  12   7   16.24    1.46
  -2 -12   7   16.66    1.48
  -2 -12   7   21.67    1.45
  -2  12   7   19.04    1.08
   0 -12   7    0.02    0.36
   2 -12   7    0.80    0.54
   4 -12   7    1.76    0.58
   4  12   7    1.78    0.70
   6 -12   7    5.15    0.71
  -6  12  -7    5.16    0.75
 -11 -13   7    1.66    0.45
  11  13  -7    1.73    0.58
  -9 -13   7   53.67    3.40
  -7 -13   7   31.44    2.11
  -7 -13   7   30.37    1.70
  -5 -13   7   27.92    1.44
  -5 -13   7   26.74    1.81
  -3 -13   7   36.23    1.84
  -3 -13   7   39.07    1.96
  -3  13   7   33.24    2.02
  -1 -13   7   30.12    1.58
  -1 -13   7   32.08    1.83
  -1  13   7   30.52    1.53
   1 -13   7   76.55    4.36
   1 -13   7   78.50    4.65
   1  13   7   83.61    3.36
   3 -13   7    7.04    0.92
   3  13   7    6.40    0.68
   5 -13   7    9.15    0.96
   7 -13   7   42.28    2.55
  -7  13  -7   48.89    3.75
 -10 -14   7   34.89    2.80
  10  14  -7   35.32    3.27
  -8 -14   7    0.30    0.66
  -8 -14   7    0.23    0.41
  -6 -14   7   32.53    2.56
  -6 -14   7   37.80    1.87
  -4 -14   7   71.21    3.21
  -4 -14   7   71.38    5.48
  -2 -14   7    8.79    0.96
  -2 -14   7   13.12    0.88
   0 -14   7    2.01    0.57
   0 -14   7    2.27    0.43
   2 -14   7   26.72    1.71
   4 -14   7   47.78    3.67
   6 -14   7    3.66    0.63
  -6  14  -7    2.90    0.52
 -11 -15   7    0.20    0.47
 -11 -15   7    0.95    0.59
  11  15  -7    0.32    0.40
  -9 -15   7   -0.12    0.37
  -9 -15   7    1.11    0.48
  -7 -15   7   20.69    2.05
  -7 -15   7   22.72    1.65
  -5 -15   7    2.01    0.44
  -3 -15   7    9.82    0.88
  -3 -15   7    6.78    0.90
  -1 -15   7   10.70    0.78
  -1 -15   7   11.83    0.73
   1 -15   7    1.72    0.44
   1 -15   7    1.21    0.42
   3 -15   7   16.87    1.07
   5 -15   7    6.82    0.86
   7 -15   7    0.72    0.72
  -7  15  -7    0.44    0.49
 -10 -16   7    9.22    0.84
  10  16  -7    9.20    0.97
  -8 -16   7    0.01    0.51
  -8 -16   7    0.32    0.48
  -6 -16   7    2.09    0.59
  -6 -16   7    2.85    0.63
  -4 -16   7   29.73    1.82
  -4 -16   7   32.76    2.02
  -2 -16   7    0.47    0.37
  -2 -16   7    0.32    0.41
   0 -16   7    2.38    0.61
   0 -16   7    2.40    0.54
   2 -16   7   30.42    1.94
   4 -16   7    1.70    0.47
   6 -16   7    1.90    0.59
  -6  16  -7    0.73    0.90
 -11 -17   7    0.83    0.43
  -9 -17   7    4.02    0.60
  -7 -17   7    1.34    0.58
  -7 -17   7    1.32    0.47
  -5 -17   7   -0.02    0.34
  -5 -17   7    0.70    0.40
  -3 -17   7    4.15    0.63
  -3 -17   7    5.64    0.64
  -1 -17   7    0.23    0.33
  -1 -17   7    0.30    0.35
   1 -17   7   10.45    0.94
   1 -17   7   11.04    0.90
   3 -17   7    1.60    0.52
   5 -17   7    0.97    0.55
 -10 -18   7   37.52    3.14
 -10 -18   7   34.30    2.90
  -8 -18   7    0.93    0.44
  -6 -18   7    2.56    0.60
  -6 -18   7    1.67    0.49
  -4 -18   7   91.23    5.11
  -4 -18   7   92.61    6.88
  -2 -18   7    1.24    0.58
  -2 -18   7    0.39    0.54
   0 -18   7    0.53    0.33
   0 -18   7    0.04    0.59
   2 -18   7  103.40    4.96
   2 -18   7   96.09    7.27
   4 -18   7    4.49    0.72
   6 -18   7    5.99    0.88
  -6  18  -7    3.91    1.08
  -9 -19   7    1.91    0.52
  -9 -19   7    0.83    0.63
  -7 -19   7   22.28    1.94
  -7 -19   7   24.09    1.82
  -5 -19   7    0.84    0.50
  -1 -19   7   38.98    2.37
  -1 -19   7   34.89    3.29
   1 -19   7   13.94    1.00
   1 -19   7   13.14    1.00
   3 -19   7    1.05    0.72
   5 -19   7   12.53    1.27
  -8 -20   7    5.63    0.73
  -8 -20   7    6.91    0.95
  -6 -20   7    2.53    0.51
  -4 -20   7    0.26    0.54
  -4 -20   7    0.50    0.54
  -2 -20   7    9.94    1.05
  -2 -20   7   12.71    1.00
   0 -20   7    4.54    0.63
   0 -20   7    4.68    0.52
   2 -20   7    0.09    0.38
   2 -20   7    0.30    0.42
   4 -20   7    6.18    0.89
  -9 -21   7   49.54    2.71
  -9 -21   7   45.49    3.21
  -7 -21   7    6.01    0.73
  -7 -21   7    6.12    0.72
  -5 -21   7    5.13    0.83
  -5 -21   7    4.16    0.55
  -3 -21   7   22.60    1.58
  -3 -21   7   24.86    1.81
  -1 -21   7   14.23    1.56
  -1 -21   7   11.64    1.10
   1 -21   7   57.75    2.73
   1 -21   7   55.84    3.27
   3 -21   7   11.04    1.08
  -8 -22   7    0.87    0.53
  -8 -22   7    1.05    0.68
  -6 -22   7    4.72    0.65
  -6 -22   7    6.87    0.76
  -4 -22   7    0.82    0.43
  -4 -22   7    0.62    0.51
  -2 -22   7   -0.08    0.65
  -2 -22   7    0.61    0.42
   0 -22   7    1.58    0.83
   0 -22   7    1.19    0.42
   2 -22   7    3.94    0.79
   2 -22   7    2.76    0.54
   4 -22   7    3.21    0.65
  -7 -23   7    6.13    1.04
  -7 -23   7    5.60    0.87
  -5 -23   7    8.77    1.14
  -5 -23   7    9.47    0.97
  -3 -23   7   13.33    1.31
  -3 -23   7   15.57    1.08
  -1 -23   7    9.53    0.94
  -1 -23   7    7.92    0.89
   1 -23   7   27.31    2.09
   1 -23   7   28.06    1.66
   3 -23   7    3.48    0.77
  -6 -24   7   10.50    1.01
  -6 -24   7    7.95    0.85
  -4 -24   7   -0.81    0.47
  -2 -24   7   12.85    1.17
  -2 -24   7   10.64    1.30
   0 -24   7    3.04    0.64
   0 -24   7    2.54    0.44
   2 -24   7    0.12    0.44
   2 -24   7   -0.50    0.76
  -7 -25   7   13.54    1.61
  -7 -25   7   14.65    1.08
  -5 -25   7    6.93    1.13
  -5 -25   7    6.02    0.74
  -3 -25   7    2.40    0.96
  -3 -25   7    2.44    0.47
  -1 -25   7    4.48    0.74
  -1 -25   7    4.73    0.72
   1 -25   7    4.69    0.86
   1 -25   7    5.08    0.74
  -6 -26   7    8.89    0.87
  -6 -26   7    6.28    1.01
  -4 -26   7   86.01    6.83
  -4 -26   7   83.97    5.14
  -2 -26   7    0.10    0.42
  -2 -26   7    0.72    0.68
   0 -26   7    0.51    0.50
   0 -26   7    2.03    0.51
  -3 -27   7    1.34    0.76
  -3 -27   7    0.08    0.46
  -1 -27   7    4.13    0.88
  -1 -27   7    3.50    0.63
 -10   0   8   37.27    3.39
  -8   0   8   28.47    2.23
  -6   0   8   52.74    3.72
  -4   0   8    8.22    0.82
  -2   0   8   48.79    2.12
   0   0   8  125.38   14.86
   0   0   8  124.32    6.67
   2   0   8    0.77    0.38
   4   0   8    2.62    0.68
   6   0   8   82.23    7.10
  -6   0  -8   81.44    6.25
 -11  -1   8    2.17    0.68
 -11   1   8    2.01    0.60
  -9  -1   8    8.47    0.91
  -9   1   8    5.96    0.99
  -7  -1   8    0.23    0.62
  -7   1   8    1.35    0.51
  -5  -1   8    2.55    0.51
  -3  -1   8   21.76    2.23
  -3  -1   8   21.49    2.05
  -3   1   8   20.97    1.69
  -1   1   8    3.19    1.32
   1  -1   8    4.24    0.89
   1  -1   8    3.56    0.49
   1   1   8    3.40    0.67
   3  -1   8   11.61    1.09
  -3  -1  -8    9.85    0.97
   3  -1   8   11.20    0.88
  -3   1  -8   10.06    0.94
   3   1   8   10.27    0.91
  -5  -1  -8    0.61    0.46
   5  -1   8    1.16    0.52
   5  -1   8    0.76    0.64
  -5   1  -8    1.20    0.46
   5   1   8    0.86    0.46
 -10  -2   8    5.84    0.84
 -10   2   8    5.15    0.81
  -8  -2   8    1.76    0.52
  -6  -2   8    3.85    0.52
  -6  -2   8    2.47    0.73
  -6   2   8    3.91    0.64
  -4  -2   8    9.02    0.90
  -4  -2   8    7.03    0.81
  -4   2   8    7.56    1.02
  -2  -2   8    1.83    0.68
  -2  -2   8    0.55    0.37
  -2   2   8    0.79    0.49
   0  -2   8    1.25    0.49
   0   2   8    1.91    0.80
   2  -2   8    0.15    0.65
   2   2   8   -0.42    0.58
   4  -2   8    2.31    0.63
   4  -2   8    1.99    0.44
  -4   2  -8    1.21    0.42
   4   2   8    2.00    0.68
  -6  -2  -8    2.22    0.62
   6  -2   8    1.87    0.45
  -6   2  -8    2.89    0.74
 -11  -3   8    5.86    0.84
 -11   3   8    7.73    0.99
  -9  -3   8    2.52    0.58
  -9   3   8    2.85    0.55
  -7  -3   8    0.28    0.34
  -7  -3   8    0.15    0.30
  -7   3   8    0.09    0.64
  -5  -3   8   14.03    1.18
  -5   3   8   13.82    1.05
  -3  -3   8    0.60    0.34
  -1  -3   8    4.29    0.84
  -1  -3   8    4.77    0.56
  -1   3   8    4.38    0.54
   1  -3   8   43.75    2.53
   1  -3   8   36.66    3.24
   1   3   8   35.29    2.49
   3  -3   8    0.85    0.46
   3  -3   8    1.14    0.47
   5  -3   8    5.99    0.95
   5   3   8    5.30    0.87
 -10  -4   8    6.41    0.72
 -10   4   8    6.06    0.89
  -8  -4   8    9.90    1.10
  -8  -4   8    8.08    0.87
  -6  -4   8    8.59    0.81
  -6  -4   8    9.84    1.16
  -6   4   8    9.78    1.00
  -4  -4   8    0.88    0.31
  -4  -4   8    0.08    0.42
  -4   4   8    0.06    0.45
  -2  -4   8    5.35    0.57
  -2  -4   8    4.87    0.59
  -2   4   8    6.76    0.78
   0  -4   8   16.05    1.25
   0  -4   8   14.83    1.44
   0   4   8   17.42    1.64
   2  -4   8    3.38    0.54
   2  -4   8    2.48    0.59
   2   4   8    3.88    0.74
   4  -4   8    1.04    0.45
   4  -4   8   -0.14    0.53
  -4   4  -8    0.81    0.37
   4   4   8    0.28    0.38
 -11  -5   8   39.18    3.47
  -9  -5   8    2.28    0.48
  -9  -5   8    2.19    0.45
  -9   5   8    2.42    0.69
  -7  -5   8    1.14    0.38
  -7  -5   8    1.24    0.58
  -7   5   8    1.82    0.55
  -5  -5   8  106.16    5.80
  -5  -5   8  111.46    7.48
  -5   5   8  121.04    6.74
  -3  -5   8   23.82    1.68
  -3  -5   8   26.87    2.52
  -3   5   8   27.88    1.74
  -1  -5   8    7.98    0.75
  -1  -5   8    7.70    0.92
  -1   5   8    8.33    0.90
   1  -5   8   46.56    3.37
   1  -5   8   48.20    2.81
   1   5   8   55.60    2.88
   3  -5   8   26.17    2.56
   3  -5   8   26.28    1.78
   3   5   8   28.73    2.02
   5  -5   8   31.59    2.74
   5  -5   8   34.76    2.18
  -5   5  -8   35.08    2.11
   5   5   8   34.50    2.15
 -10  -6   8    2.41    0.44
  -8  -6   8   18.44    2.02
  -8  -6   8   20.01    1.52
  -8   6   8   22.45    1.89
  -6  -6   8    2.52    0.67
  -6   6   8    1.95    0.52
  -4  -6   8    8.65    0.93
  -4  -6   8    7.47    1.62
  -4   6   8    8.12    0.85
  -2  -6   8   20.65    1.62
  -2   6   8   19.04    1.41
   0  -6   8   -0.07    0.29
   0   6   8    0.42    0.36
   2  -6   8   14.31    1.05
   2   6   8   13.49    1.04
   4  -6   8    3.67    0.60
   4  -6   8    4.81    0.76
   4   6   8    4.58    0.75
  -4   6  -8    3.29    0.45
  -9  -7   8    1.23    0.38
  -9  -7   8    0.98    0.57
  -7  -7   8    0.53    0.24
  -7  -7   8    1.12    0.47
  -7   7   8    0.81    0.40
  -5  -7   8    9.51    1.04
  -5  -7   8    7.47    1.01
  -5  -7   8    7.55    0.73
  -5   7   8    8.50    0.84
  -3  -7   8   13.03    1.34
  -3  -7   8   13.00    0.97
  -3   7   8   11.23    0.85
  -1  -7   8    0.76    0.28
  -1   7   8    1.14    0.63
   1  -7   8    2.94    0.49
   1   7   8    2.93    0.79
   3  -7   8    7.00    0.78
   3   7   8    5.51    0.83
   5  -7   8    1.88    0.60
   5  -7   8    1.93    0.50
  -5   7  -8    2.90    0.89
 -10  -8   8   29.56    3.38
 -10  -8   8   28.00    2.50
  -8  -8   8    5.68    0.68
  -8   8   8    5.37    0.86
  -6  -8   8   17.92    1.36
  -6  -8   8   15.13    1.37
  -6  -8   8   15.00    1.51
  -6   8   8   15.09    1.69
  -4  -8   8   15.39    1.17
  -4  -8   8   15.95    1.53
  -4   8   8   17.72    1.27
  -2  -8   8    2.08    0.44
   0  -8   8   33.73    3.17
   0   8   8   38.50    2.75
   2   8   8    1.26    0.66
   4  -8   8    0.20    0.37
   4   8   8    1.13    0.74
  -4   8  -8    0.20    0.35
  -9  -9   8    0.56    0.49
  -9  -9   8    0.26    0.31
  -7  -9   8    2.91    0.46
  -7  -9   8    3.02    0.62
  -7   9   8    3.86    0.89
  -5  -9   8   34.47    2.48
  -5  -9   8   35.23    2.85
  -5   9   8   34.91    2.32
  -3  -9   8    2.93    0.48
  -3   9   8    4.01    0.63
  -1  -9   8    1.68    0.54
   1  -9   8   19.46    1.53
   1   9   8   18.04    1.39
   3  -9   8    6.87    0.97
   3   9   8    8.36    1.11
   5  -9   8    0.84    0.47
   5   9   8    1.26    0.54
 -10 -10   8   11.98    0.94
 -10 -10   8   14.30    1.50
  -8 -10   8    8.96    1.05
  -8 -10   8    8.40    1.06
  -8 -10   8    9.22    0.86
  -6 -10   8   18.74    2.02
  -6 -10   8   22.64    1.70
  -6  10   8   26.45    2.15
  -4 -10   8    1.44    0.42
  -4  10   8    0.73    0.40
  -2 -10   8   15.12    1.17
  -2 -10   8   18.61    1.78
  -2  10   8   21.21    1.21
   0 -10   8   34.28    2.90
   0  10   8   36.22    2.60
   2 -10   8    2.77    0.62
   2  10   8    5.75    2.79
   4 -10   8    3.12    0.82
   4  10   8    3.87    0.66
  -9 -11   8    9.24    1.42
  -9 -11   8   10.18    1.30
  -9 -11   8   10.77    0.93
  -7 -11   8    1.65    0.43
  -5 -11   8    4.32    1.56
  -5 -11   8    4.37    1.14
  -5  11   8    2.71    0.82
  -3 -11   8   29.94    2.73
  -3 -11   8   34.45    2.17
  -3  11   8   29.27    1.98
  -1 -11   8    6.43    0.66
  -1  11   8    5.88    0.86
   1  11   8    2.36    0.63
   3 -11   8    6.02    0.88
  -8 -12   8    6.55    0.92
  -8 -12   8    5.83    0.70
  -8 -12   8    5.12    0.56
  -6 -12   8   28.23    2.00
  -6 -12   8   29.01    3.01
  -4 -12   8    2.22    0.51
  -4  12   8    2.84    0.58
  -2 -12   8   19.68    1.53
  -2 -12   8   23.55    1.44
  -2  12   8   20.63    1.43
   0 -12   8   31.80    2.46
   0  12   8   33.56    2.53
   2 -12   8    1.92    0.68
   4 -12   8    0.90    0.50
   4  12   8    0.83    0.42
  -9 -13   8    1.97    0.63
  -9 -13   8    0.89    0.30
  -9 -13   8    1.33    0.41
  -7 -13   8   -0.78    0.49
  -7 -13   8    0.09    0.49
  -5 -13   8   44.21    2.65
  -5 -13   8   39.64    2.65
  -3 -13   8    8.88    0.92
  -3 -13   8    8.96    1.07
  -3  13   8    7.49    1.00
  -1 -13   8    1.16    0.36
  -1 -13   8    1.57    0.51
  -1  13   8    1.40    0.52
   1 -13   8   25.61    2.24
   1  13   8   23.51    2.40
   3 -13   8   13.46    1.43
  -8 -14   8    2.35    0.66
  -8 -14   8    2.06    0.61
  -6 -14   8    8.94    0.98
  -6 -14   8    7.45    0.84
  -4 -14   8    8.36    0.97
  -4 -14   8   10.43    1.02
  -2 -14   8    0.80    0.43
  -2 -14   8    0.65    0.41
  -2  14   8    0.76    0.51
   0 -14   8   27.23    1.74
   2 -14   8    2.06    0.63
   4 -14   8    0.08    0.37
  -7 -15   8    0.14    0.34
  -7 -15   8    1.19    0.35
  -5 -15   8    2.52    0.67
  -5 -15   8    3.27    0.57
  -3 -15   8   10.71    1.24
  -3 -15   8    9.27    0.96
  -1 -15   8   -0.06    0.33
  -1 -15   8    0.55    0.37
   1 -15   8    3.35    0.96
   3 -15   8    9.82    1.36
  -8 -16   8    7.48    1.00
  -8 -16   8    6.54    0.95
  -6 -16   8    0.06    0.47
  -6 -16   8   -0.73    0.47
  -4 -16   8    5.79    0.82
  -4 -16   8    6.77    0.79
  -2 -16   8    4.34    0.67
  -2 -16   8    4.96    0.69
   2 -16   8    5.42    0.59
  -7 -17   8    1.40    0.41
  -7 -17   8    0.70    0.44
  -5 -17   8   55.40    3.34
  -5 -17   8   55.86    4.26
  -3 -17   8   14.59    1.16
  -3 -17   8   12.15    1.20
  -1 -17   8    7.52    1.15
  -1 -17   8    8.25    0.71
   1 -17   8   40.75    3.05
  -6 -18   8    2.17    0.52
  -6 -18   8    3.20    0.92
  -4 -18   8    0.27    0.32
  -4 -18   8    0.27    0.47
  -2 -18   8   14.50    1.20
  -2 -18   8   17.21    1.43
   0 -18   8   12.23    1.08
   0 -18   8   12.58    1.49
   2 -18   8    3.24    0.69
  -5 -19   8    7.59    0.78
  -5 -19   8    8.38    0.79
  -3 -19   8    0.80    0.39
  -3 -19   8    1.37    0.64
  -1 -19   8    1.43    0.71
   1 -19   8    9.90    1.16
  -6 -20   8    1.05    0.39
  -4 -20   8    3.47    0.81
  -4 -20   8    4.62    0.70
  -2 -20   8    0.52    0.44
  -2 -20   8    0.19    0.63
   0 -20   8    1.27    0.42
   0 -20   8    0.83    0.43
  -5 -21   8    0.77    0.36
  -3 -21   8    4.48    0.81
  -3 -21   8    5.52    0.72
  -1 -21   8    0.92    0.43
  -6   0   9   -0.59    0.57
  -4   0   9    0.90    0.61
  -2   0   9    0.94    0.53
   0   0   9    1.16    0.84
  -7  -1   9   30.39    2.96
  -7   1   9   33.05    2.76
  -5  -1   9    0.58    0.41
  -5   1   9    0.17    0.60
  -3  -1   9    0.61    0.47
  -3   1   9    1.05    0.56
  -1  -1   9   39.66    3.83
  -1   1   9   47.20    4.41
   1  -1   9    4.77    0.54
   1   1   9    6.36    0.87
  -6  -2   9    1.61    0.64
  -6   2   9    0.52    0.71
  -4  -2   9   10.17    1.23
  -4   2   9    8.82    1.17
   0  -2   9    3.77    0.97
   0   2   9    3.64    0.59
  -7  -3   9   10.20    1.34
  -7   3   9   10.95    1.16
  -5  -3   9    3.13    0.69
  -5   3   9    2.36    0.52
  -3  -3   9    7.47    0.83
  -3   3   9    7.83    0.78
  -1   3   9    5.55    0.81
   1  -3   9    7.67    1.09
   1   3   9   10.98    0.96
  -6  -4   9   44.98    3.72
  -6   4   9   45.76    3.34
  -4  -4   9   15.03    1.39
  -4   4   9   14.04    1.48
  -2  -4   9   20.22    2.24
  -2   4   9   22.21    1.93
   0  -4   9   12.62    1.75
   0   4   9   15.54    1.39
  -5  -5   9    1.54    0.77
  -5   5   9    2.64    0.78
  -3  -5   9    0.08    0.59
  -3   5   9    0.30    0.84
  -1  -5   9    1.93    1.07
  -1   5   9    1.56    0.59
   1  -5   9    3.79    0.63
   1   5   9    4.75    0.62
  -6  -6   9    6.15    1.18
  -6   6   9    6.03    1.06
  -4  -6   9    1.10    0.45
  -4   6   9    0.60    0.43
  -2  -6   9    4.68    0.95
  -2   6   9    4.07    0.63
   0  -6   9    7.68    0.98
   0   6   9    6.16    1.06
  -5  -7   9    9.47    1.16
  -5   7   9   10.67    0.96
  -3  -7   9    1.21    0.69
  -3   7   9    2.16    0.50
  -1  -7   9    2.10    0.59
  -1   7   9    2.60    0.86
   1   7   9    6.82    0.78
  -6  -8   9   19.20    2.16
  -6   8   9   17.88    1.84
  -4  -8   9    9.75    0.82
  -4   8   9   11.02    1.07
  -2  -8   9   10.72    0.96
  -2   8   9    9.46    0.93
   0  -8   9    5.04    0.67
   0   8   9    5.64    0.88
  -5  -9   9    0.44    0.51
  -5   9   9    0.75    0.73
  -3  -9   9    5.13    0.63
  -3   9   9    5.40    0.79
  -1   9   9   61.90    4.90
  -4 -10   9   10.01    1.05
  -4  10   9    7.26    0.70
  -2 -10   9    3.91    0.51
  -2  10   9    2.59    0.67
  -3  11   9    1.57    0.55
  -1  11   9    0.82    0.55
   0   0   0    0.00    0.00
;
_shelx_hkl_checksum   63191

_shelx_fab_file
;
    2    0    0     75.77      0.00
    4    0    0     10.40      0.00
    6    0    0     13.41      0.00
    8    0    0      0.60      0.00
   10    0    0     -1.65      0.00
   12    0    0     -0.27      0.00
   14    0    0     -0.08      0.00
    1    1    0    123.52      0.00
    3    1    0     29.70      0.00
    5    1    0     11.08      0.00
    7    1    0      8.43      0.00
    9    1    0     -2.81      0.00
   11    1    0      0.01      0.00
   13    1    0     -0.94      0.00
   15    1    0      1.39      0.00
    2    2    0     68.79      0.00
    4    2    0     11.37      0.00
    6    2    0     13.14      0.00
    8    2    0      0.92      0.00
   10    2    0     -1.40      0.00
   12    2    0     -0.39      0.00
   14    2    0     -0.33      0.00
   16    2    0      1.90      0.00
    1    3    0     98.46      0.00
    3    3    0     27.29      0.00
    5    3    0     11.90      0.00
    7    3    0      8.00      0.00
    9    3    0     -1.91      0.00
   11    3    0     -0.01      0.00
   13    3    0     -1.23      0.00
   15    3    0      0.99      0.00
    2    4    0     51.62      0.00
    4    4    0     13.32      0.00
    6    4    0     11.99      0.00
    8    4    0      1.61      0.00
   10    4    0     -0.85      0.00
   12    4    0     -0.56      0.00
   14    4    0     -0.75      0.00
   16    4    0      1.64      0.00
    1    5    0     61.70      0.00
    3    5    0     23.30      0.00
    5    5    0     12.12      0.00
    7    5    0      6.87      0.00
    9    5    0     -0.70      0.00
   11    5    0     -0.04      0.00
   13    5    0     -1.27      0.00
   15    5    0      0.61      0.00
    0    6    0     49.42      0.00
    2    6    0     32.70      0.00
    4    6    0     14.21      0.00
    6    6    0      9.53      0.00
    8    6    0      2.05      0.00
   10    6    0     -0.37      0.00
   12    6    0     -0.46      0.00
   14    6    0     -0.68      0.00
   16    6    0      1.39      0.00
    1    7    0     30.17      0.00
    3    7    0     18.86      0.00
    5    7    0     10.46      0.00
    7    7    0      5.01      0.00
    9    7    0      0.17      0.00
   11    7    0     -0.06      0.00
   13    7    0     -0.69      0.00
   15    7    0      0.61      0.00
    0    8    0     19.67      0.00
    2    8    0     19.15      0.00
    4    8    0     12.82      0.00
    6    8    0      6.11      0.00
    8    8    0      1.95      0.00
   10    8    0     -0.19      0.00
   12    8    0     -0.05      0.00
   14    8    0     -0.01      0.00
   16    8    0      1.19      0.00
    1    9    0     13.13      0.00
    3    9    0     14.75      0.00
    5    9    0      7.21      0.00
    7    9    0      2.96      0.00
    9    9    0      0.49      0.00
   11    9    0     -0.08      0.00
   13    9    0      0.20      0.00
   15    9    0      0.85      0.00
    2   10    0     12.56      0.00
    4   10    0      9.68      0.00
    6   10    0      2.92      0.00
    8   10    0      1.52      0.00
   10   10    0     -0.15      0.00
   12   10    0      0.30      0.00
   14   10    0      0.63      0.00
   16   10    0      0.94      0.00
    1   11    0      8.42      0.00
    3   11    0     11.10      0.00
    5   11    0      3.96      0.00
    7   11    0      1.44      0.00
    9   11    0      0.58      0.00
   11   11    0     -0.08      0.00
   13   11    0      0.59      0.00
   15   11    0      0.75      0.00
    0   12    0      7.01      0.00
    2   12    0      9.80      0.00
    4   12    0      6.31      0.00
    6   12    0      1.05      0.00
    8   12    0      1.14      0.00
   10   12    0      0.03      0.00
   12   12    0      0.23      0.00
   14   12    0      0.43      0.00
    1   13    0      7.78      0.00
    3   13    0      7.67      0.00
    5   13    0      2.03      0.00
    7   13    0      0.73      0.00
    9   13    0      0.73      0.00
   11   13    0     -0.03      0.00
   13   13    0      0.00      0.00
   15   13    0     -0.05      0.00
    0   14    0      6.58      0.00
    2   14    0      7.00      0.00
    4   14    0      3.80      0.00
    6   14    0      0.51      0.00
    8   14    0      0.89      0.00
   10   14    0      0.42      0.00
   12   14    0     -0.31      0.00
   14   14    0     -0.78      0.00
    1   15    0      5.12      0.00
    3   15    0      4.38      0.00
    5   15    0      1.36      0.00
    7   15    0      0.43      0.00
    9   15    0      0.88      0.00
   11   15    0      0.02      0.00
   13   15    0     -1.29      0.00
   15   15    0     -1.29      0.00
    0   16    0      2.67      0.00
    2   16    0      3.02      0.00
    4   16    0      2.18      0.00
    6   16    0      0.42      0.00
    8   16    0      0.56      0.00
   10   16    0      0.70      0.00
   12   16    0     -1.05      0.00
   14   16    0     -2.30      0.00
    1   17    0      0.37      0.00
    3   17    0      1.56      0.00
    5   17    0      0.95      0.00
    7   17    0      0.02      0.00
    9   17    0      0.73      0.00
   11   17    0     -0.12      0.00
   13   17    0     -2.50      0.00
   15   17    0     -2.22      0.00
    0   18    0     -2.20      0.00
    2   18    0     -0.60      0.00
    4   18    0      0.91      0.00
    6   18    0      0.01      0.00
    8   18    0      0.04      0.00
   10   18    0      0.49      0.00
   12   18    0     -1.67      0.00
   14   18    0     -3.16      0.00
    1   19    0     -3.07      0.00
    3   19    0     -0.32      0.00
    5   19    0      0.14      0.00
    7   19    0     -0.50      0.00
    9   19    0      0.19      0.00
   11   19    0     -0.59      0.00
   13   19    0     -3.02      0.00
    0   20    0     -4.11      0.00
    2   20    0     -2.11      0.00
    4   20    0     -0.26      0.00
    6   20    0     -0.63      0.00
    8   20    0     -0.42      0.00
   10   20    0     -0.19      0.00
   12   20    0     -2.08      0.00
   14   20    0     -2.94      0.00
    1   21    0     -3.10      0.00
    3   21    0     -1.07      0.00
    5   21    0     -0.77      0.00
    7   21    0     -0.73      0.00
    9   21    0     -0.36      0.00
   11   21    0     -1.23      0.00
   13   21    0     -2.81      0.00
    0   22    0     -2.45      0.00
    2   22    0     -1.55      0.00
    4   22    0     -1.03      0.00
    6   22    0     -0.89      0.00
    8   22    0     -0.43      0.00
   10   22    0     -0.80      0.00
   12   22    0     -2.24      0.00
   14   22    0     -1.94      0.00
    1   23    0     -1.03      0.00
    3   23    0     -1.05      0.00
    5   23    0     -1.08      0.00
    7   23    0     -0.39      0.00
    9   23    0     -0.38      0.00
   11   23    0     -1.61      0.00
   13   23    0     -2.19      0.00
    0   24    0      0.07      0.00
    2   24    0     -0.51      0.00
    4   24    0     -1.11      0.00
    6   24    0     -0.49      0.00
    8   24    0      0.08      0.00
   10   24    0     -0.75      0.00
   12   24    0     -2.10      0.00
    1   25    0      0.40      0.00
    3   25    0     -0.84      0.00
    5   25    0     -0.59      0.00
    7   25    0      0.22      0.00
    9   25    0      0.24      0.00
   11   25    0     -1.37      0.00
   13   25    0     -1.47      0.00
    0   26    0      0.78      0.00
    2   26    0     -0.36      0.00
    4   26    0     -0.62      0.00
    6   26    0      0.16      0.00
    8   26    0      0.71      0.00
   10   26    0     -0.01      0.00
   12   26    0     -1.58      0.00
    1   27    0     -0.01      0.00
    3   27    0     -0.76      0.00
    5   27    0      0.18      0.00
    7   27    0      0.53      0.00
    9   27    0      1.04      0.00
   11   27    0     -0.61      0.00
    0   28    0     -0.34      0.00
    2   28    0     -0.98      0.00
    4   28    0     -0.04      0.00
    6   28    0      0.42      0.00
    8   28    0      0.92      0.00
   10   28    0      0.86      0.00
   12   28    0     -0.82      0.00
    1   29    0     -1.12      0.00
    3   29    0     -0.71      0.00
    5   29    0      0.53      0.00
    7   29    0      0.26      0.00
    9   29    0      1.39      0.00
   11   29    0      0.16      0.00
    0   30    0     -1.23      0.00
    2   30    0     -1.25      0.00
    4   30    0      0.22      0.00
    6   30    0      0.12      0.00
    8   30    0      0.61      0.00
   10   30    0      1.19      0.00
    1   31    0     -1.09      0.00
    3   31    0     -0.42      0.00
    5   31    0      0.27      0.00
    7   31    0     -0.24      0.00
    9   31    0      1.08      0.00
   11   31    0      0.45      0.00
    0   32    0     -0.37      0.00
    2   32    0     -0.44      0.00
    4   32    0      0.10      0.00
    6   32    0     -0.37      0.00
    8   32    0      0.17      0.00
   10   32    0      0.82      0.00
    1   33    0      0.50      0.00
    3   33    0      0.09      0.00
    5   33    0     -0.30      0.00
    7   33    0     -0.42      0.00
    9   33    0      0.49      0.00
    0   34    0      1.72      0.00
    2   34    0      0.97      0.00
    4   34    0     -0.22      0.00
    6   34    0     -0.58      0.00
    8   34    0      0.06      0.00
    1   35    0      2.34      0.00
    3   35    0      0.48      0.00
    5   35    0     -0.74      0.00
    7   35    0     -0.09      0.00
    0   36    0      3.19      0.00
    2   36    0      1.84      0.00
    4   36    0     -0.56      0.00
    6   36    0     -0.41      0.00
    8   36    0      0.34      0.00
    1   37    0      2.88      0.00
    3   37    0      0.39      0.00
    5   37    0     -0.89      0.00
    7   37    0      0.43      0.00
    0   38    0      2.86      0.00
    2   38    0      1.50      0.00
    4   38    0     -0.83      0.00
    6   38    0     -0.11      0.00
    1   39    0      1.82      0.00
    3   39    0     -0.16      0.00
    5   39    0     -0.81      0.00
    0   40    0      1.26      0.00
    2   40    0      0.34      0.00
    4   40    0     -0.98      0.00
    1   41    0      0.28      0.00
  -15    1    1     -0.24      0.00
  -13    1    1     -0.38      0.00
  -11    1    1     -0.20      0.00
   -9    1    1     -0.01      0.00
   -7    1    1      1.36      0.00
   -5    1    1      1.40      0.00
   -3    1    1      4.42      0.00
    1    1    1     -0.97      0.00
    3    1    1     -0.47      0.00
    5    1    1      0.47      0.00
    7    1    1      0.31      0.00
    9    1    1     -0.06      0.00
   11    1    1      0.35      0.00
   13    1    1      0.59      0.00
   15    1    1      0.83      0.00
  -16    2    1      0.41      0.00
  -14    2    1     -1.08      0.00
  -12    2    1     -0.13      0.00
  -10    2    1     -0.69      0.00
   -8    2    1      1.55      0.00
   -6    2    1      2.41      0.00
   -4    2    1      4.84      0.00
   -2    2    1      9.40      0.00
    0    2    1      1.97      0.00
    2    2    1     -1.96      0.00
    4    2    1      0.55      0.00
    6    2    1      0.87      0.00
    8    2    1      0.11      0.00
   10    2    1      0.15      0.00
   12    2    1      0.98      0.00
   14    2    1      1.21      0.00
   16    2    1      1.35      0.00
  -15    3    1     -0.87      0.00
  -13    3    1     -0.86      0.00
  -11    3    1     -0.28      0.00
   -9    3    1     -0.09      0.00
   -7    3    1      3.57      0.00
   -5    3    1      3.41      0.00
   -3    3    1     10.73      0.00
   -1    3    1      9.52      0.00
    1    3    1     -1.15      0.00
    3    3    1     -0.37      0.00
    5    3    1      1.50      0.00
    7    3    1      0.65      0.00
    9    3    1     -0.14      0.00
   11    3    1      0.94      0.00
   13    3    1      1.22      0.00
   15    3    1      1.92      0.00
  -16    4    1      0.16      0.00
  -14    4    1     -1.90      0.00
  -12    4    1      0.23      0.00
  -10    4    1     -0.98      0.00
   -8    4    1      2.41      0.00
[truncated: 117,452 more chars]
