# Supplementary material
Source: MDPI journal article supplement (https://www.mdpi.com/2073-4352/9/6/319)
Supplement: s1 [file s1 › crystals-519846-su.pdf]

**Figure S3.** Packing of **2** along the crystallographic c-axis.
